# Supplementary material for: High-Density, Targeted Monitoring of Tyrosine Phosphorylation Reveals Activated Signaling Networks in Human Tumors
Source: Oxford University Press journal article supplement (doi:10.1158/0008-5472.can-20-3804), 2021-01-28
Supplement: 00085472can203804-sup-255483_2_supp_6838242_qmsgw0.xlsx [file 00085472can203804-sup-255483_2_supp_6838242_qmsgw0.xlsx]

## Sheet: Table S3
Table S3: Peptides identified in four multiplexed, discovery pTyr analyses of colorectal tumors.
Values in Analyses 1-4 represent the log2 transformed ratio of Tumor pTyr signal over Normal tissue pTyr signal
		Analysis 1					Analysis 2					Analysis 3					Analysis 4
Sequence	Gene	21CO007	11CO033	11CO032	11CO031	11CO030	05CO037	05CO034	01CO019	01CO014	01CO013	27CO004	20CO004	20CO003	14CO002	11CO036	05CO041	05CO029	01CO005	01CO006	01CO008	Median Log2(FC)	# Runs seen (max 4)	Source Protein	Modifications
	SIGLEC9	4.77756	3.33523	5.20525	5.55577	4.04434																4.58363	1	Sialic acid-binding Ig-like lectin 9 OS=Homo sapiens OX=9606 GN=SIGLEC9 PE=1 SV=2	N-Term(TMT6plex); [Y]9(Phospho); K13(TMT6plex)
	FGR	4.93731	3.61041	2.49898	5.29575	3.73274						3.20931	3.5522	1.95665	3.00294	3.30146						3.50977	2	Tyrosine-protein kinase Fgr OS=Homo sapiens OX=9606 GN=FGR PE=1 SV=2	N-Term(TMT6plex); K3(TMT6plex); [Y]7(Phospho); C10(Carbamidomethyl); K14(TMT6plex)
	FGR	3.81398	3.22088	2.49729	4.82154	2.83504																3.43775	1	Tyrosine-protein kinase Fgr OS=Homo sapiens OX=9606 GN=FGR PE=1 SV=2	N-Term(TMT6plex); [Y]8(Phospho); K14(TMT6plex)
	RPS10	3.06518	2.38171	2.83983	4.06886	4.70139																3.4114	1	40S ribosomal protein S10 OS=Homo sapiens OX=9606 GN=RPS10 PE=1 SV=1	N-Term(TMT6plex); [Y]4(Phospho); K9(TMT6plex)
	PDZK1IP1	3.0192	1.26526	2.19663	2.74804	3.673	4.16068	4.05295	3.1967	3.23993	5.24158											3.2794	2	PDZK1-interacting protein 1 OS=Homo sapiens OX=9606 GN=PDZK1IP1 PE=1 SV=1	N-Term(TMT6plex); [Y]1(Phospho)
	PKP3	4.16068	4.05295	3.1967	3.23993	5.24158						1.72162	3.01816	1.71137	4.2564	2.10144						3.27008	2	Plakophilin-3 OS=Homo sapiens OX=9606 GN=PKP3 PE=1 SV=1	N-Term(TMT6plex); [Y]4(Phospho); K10(TMT6plex)
	EFNB1	4.09205	1.92271	2.73277	3.07469	4.42641																3.24973	1	Ephrin-B1 OS=Homo sapiens OX=9606 GN=EFNB1 PE=1 SV=1	N-Term(TMT6plex); [Y]6(Phospho); C7(Carbamidomethyl); K12(TMT6plex)
	GPRC5C	5.41547	2.67704	3.116	1.50948	3.51166																3.24593	1	G-protein coupled receptor family C group 5 member C OS=Homo sapiens OX=9606 GN=GPRC5C PE=1 SV=2	N-Term(TMT6plex); [Y]12(Phospho)
	ARHGEF5	3.00678	2.86426	2.3832	5.54879	2.40113																3.24083	1	Rho guanine nucleotide exchange factor 5 OS=Homo sapiens OX=9606 GN=ARHGEF5 PE=1 SV=3	N-Term(TMT6plex); [Y]6(Phospho); K10(TMT6plex)
	FGR	3.25964	2.77113	2.66224	3.89812	3.4161																3.20145	1	Tyrosine-protein kinase Fgr OS=Homo sapiens OX=9606 GN=FGR PE=1 SV=2	N-Term(TMT6plex); [Y]2(Phospho); K14(TMT6plex)
	GPRC5A	4.34387	2.02096	3.62002	2.81027	3.20055																3.19913	1	Retinoic acid-induced protein 3 OS=Homo sapiens OX=9606 GN=GPRC5A PE=1 SV=2	N-Term(TMT6plex); [Y]19(Phospho); K35(TMT6plex)
	TYROBP	2.31328	2.77318	2.48228	3.91773	4.21666																3.14063	1	TYRO protein tyrosine kinase-binding protein OS=Homo sapiens OX=9606 GN=TYROBP PE=1 SV=1	N-Term(TMT6plex); [Y]4(Phospho); K15(TMT6plex)
	FRK	3.04358	1.87749	3.11318	4.13024	3.1558																3.06406	1	Tyrosine-protein kinase FRK OS=Homo sapiens OX=9606 GN=FRK PE=1 SV=1	N-Term(TMT6plex); [Y]7(Phospho); K14(TMT6plex)
	LSR	3.22309	1.5855	3.60017	2.72899	3.72053																2.97166	1	Lipolysis-stimulated lipoprotein receptor OS=Homo sapiens OX=9606 GN=LSR PE=1 SV=4	N-Term(TMT6plex); [Y]6(Phospho)
	HBB						2.21554	2.55525	2.30422	4.03301	3.55631											2.93287	1	Hemoglobin subunit beta OS=Homo sapiens OX=9606 GN=HBB PE=1 SV=2	N-Term(TMT6plex); [Y]10(Phospho); K12(TMT6plex)
	GPRC5C	4.85909	0.374548	2.70848	2.94714	3.45775																2.8694	1	G-protein coupled receptor family C group 5 member C OS=Homo sapiens OX=9606 GN=GPRC5C PE=1 SV=2	N-Term(TMT6plex); [Y]7(Phospho)
	ADAM9	2.88115	2.00033	2.27625	3.47789	3.59061																2.84525	1	Disintegrin and metalloproteinase domain-containing protein 9 OS=Homo sapiens OX=9606 GN=ADAM9 PE=1 SV=1	N-Term(TMT6plex); [Y]6(Phospho); K9(TMT6plex)
	TMC5	3.63959	1.9154	2.8265	2.18074	3.0041																2.71327	1	Transmembrane channel-like protein 5 OS=Homo sapiens OX=9606 GN=TMC5 PE=2 SV=3	N-Term(TMT6plex); [Y]13(Phospho)
	EPS8	4.11436	2.64511	2.21274	2.02312	2.38663																2.67639	1	Epidermal growth factor receptor kinase substrate 8 OS=Homo sapiens OX=9606 GN=EPS8 PE=1 SV=1	N-Term(TMT6plex); [Y]2(Phospho)
	CLDN2	3.01122	1.36553	2.44429	3.52107	2.62712																2.59384	1	Claudin-2 OS=Homo sapiens OX=9606 GN=CLDN2 PE=1 SV=1	N-Term(TMT6plex); [Y]3(Phospho)
	RPL35A	3.49434	3.06588	3.33357	3.71224	4.30652	1.09661	1.47654	1.93353	1.127	1.51982	2.47542	2.55117	1.7928	3.81104	2.69012	1.07699	2.87157	1.42905	3.78311	3.56298	2.55551	4	60S ribosomal protein L35a OS=Homo sapiens OX=9606 GN=RPL35A PE=1 SV=2	N-Term(TMT6plex); [Y]5(Phospho)
	CD247											2.33106	1.48453	3.71315	1.92622	3.31925						2.55484	1	T-cell surface glycoprotein CD3 zeta chain OS=Homo sapiens OX=9606 GN=CD247 PE=1 SV=2	N-Term(TMT6plex); K1(TMT6plex); [Y]8(Phospho); K13(TMT6plex)
	ASS1	1.20488	2.39818	0.346189	6.28134	2.33555																2.51323	1	Argininosuccinate synthase OS=Homo sapiens OX=9606 GN=ASS1 PE=1 SV=2	N-Term(TMT6plex); C5(Carbamidomethyl); [Y]6(Phospho); K13(TMT6plex)
	GPRC5C	5.07634	2.69634	2.64622	2.2486	3.845											-0.0673965	2.78683	1.11605	2.12976	2.60643	2.50842	2	G-protein coupled receptor family C group 5 member C OS=Homo sapiens OX=9606 GN=GPRC5C PE=1 SV=2	N-Term(TMT6plex); [Y]3(Phospho)
	EPHA1																2.02474	3.54695	1.05972	2.13275	3.69368	2.49157	1	Ephrin type-A receptor 1 OS=Homo sapiens OX=9606 GN=EPHA1 PE=1 SV=4	N-Term(TMT6plex); [Y]9(Phospho); K15(TMT6plex)
	SHB																2.48296	2.36426	1.18086	1.83204	4.55395	2.48281	1	SH2 domain-containing adapter protein B OS=Homo sapiens OX=9606 GN=SHB PE=1 SV=2	N-Term(TMT6plex); [Y]7(Phospho); K14(TMT6plex)
	EPHA2	2.91259	0.600104	2.40035	3.96379	3.70275	3.66829	2.97689	2.04357	3.47198	3.37959						3.44944	1.25126	0.472115	1.62611	1.2553	2.47828	3	Ephrin type-A receptor 2 OS=Homo sapiens OX=9606 GN=EPHA2 PE=1 SV=2	N-Term(TMT6plex); [Y]8(Phospho); K17(TMT6plex)
	PHB2	3.66829	2.97689	2.04357	3.47198	3.37959											0.116947	2.03568	2.18801	1.98408	2.80704	2.46721	2	Prohibitin-2 OS=Homo sapiens OX=9606 GN=PHB2 PE=1 SV=2	N-Term(TMT6plex); [Y]5(Phospho)
	PERP	2.69477	1.74338	1.98545	2.44262	3.40961																2.45517	1	p53 apoptosis effector related to PMP-22 OS=Homo sapiens OX=9606 GN=PERP PE=2 SV=1	N-Term(TMT6plex); [Y]1(Phospho)
	CLDN3	4.35159	1.65563	3.81844	3.58363	4.9554	0.930122	2.02653	2.12946	1.8439	2.25493	3.24373	2.99927	1.89735	3.13622	2.15862	0.764462	2.29186	0.108091	1.83884	2.82153	2.44048	4	Claudin-3 OS=Homo sapiens OX=9606 GN=CLDN3 PE=1 SV=1	N-Term(TMT6plex); [Y]3(Phospho)
	DSP	1.23768	1.86132	1.53307	6.35929	1.13798																2.42587	1	Desmoplakin OS=Homo sapiens OX=9606 GN=DSP PE=1 SV=3	N-Term(TMT6plex); [Y]8(Phospho)
	PTPN18						1.77156	2.14631	0.0622454	5.79577	2.29968											2.41511	1	Tyrosine-protein phosphatase non-receptor type 18 OS=Homo sapiens OX=9606 GN=PTPN18 PE=1 SV=2	N-Term(TMT6plex); [Y]8(Phospho); K10(TMT6plex)
	RNPS1	1.77156	2.14631	0.0622454	5.79577	2.29968																2.41511	1	RNA-binding protein with serine-rich domain 1 OS=Homo sapiens OX=9606 GN=RNPS1 PE=1 SV=1	N-Term(TMT6plex); [Y]2(Phospho); K15(TMT6plex)
	CDK2	3.58321	2.97082	3.51046	3.35255	3.4201	2.1148	2.17326	2.18786	1.6676	1.97255	1.99132	2.07254	1.75695	4.10136	2.64623	2.72604	1.9579	-0.488232	1.29013	3.2619	2.41347	4	Cyclin-dependent kinase 2 OS=Homo sapiens OX=9606 GN=CDK2 PE=1 SV=2; Cyclin-dependent kinase 1 OS=Homo sapiens OX=9606 GN=CDK1 PE=1 SV=3; Cyclin-dependent kinase 3 OS=Homo sapiens OX=9606 GN=CDK3 PE=1 SV=1	N-Term(TMT6plex); T5(Phospho); [Y]6(Phospho); K11(TMT6plex)
	LST1	2.82049	2.44345	2.47043	4.46519	2.82149						1.36097	1.9189	2.57168	1.7871	1.43222						2.40919	2	Leukocyte-specific transcript 1 protein OS=Homo sapiens OX=9606 GN=LST1 PE=1 SV=2	N-Term(TMT6plex); [Y]3(Phospho); C5(Carbamidomethyl); K10(TMT6plex)
	EPHB4	3.52828	0.694204	2.23163	3.04795	2.5894											2.88358	1.45475	1.55179	1.27898	4.82868	2.40893	2	Ephrin type-B receptor 4 OS=Homo sapiens OX=9606 GN=EPHB4 PE=1 SV=2; Ephrin type-B receptor 3 OS=Homo sapiens OX=9606 GN=EPHB3 PE=1 SV=2	N-Term(TMT6plex); [Y]8(Phospho)
	EPHB3	4.07932	0.809662	2.85187	3.33668	2.55495	1.65881	1.78094	2.14608	3.85519	0.901329						3.7868	2.03515	1.38403	1.15378	3.73888	2.4049	3	Ephrin type-B receptor 3 OS=Homo sapiens OX=9606 GN=EPHB3 PE=1 SV=2	N-Term(TMT6plex); [Y]11(Phospho); K18(TMT6plex)
	ANXA11	2.53143	2.03418	1.8443	3.12169	2.41694																2.38971	1	Annexin A11 OS=Homo sapiens OX=9606 GN=ANXA11 PE=1 SV=1	N-Term(TMT6plex); [Y]3(Phospho)
	MPZL1						1.71837	2.37967	2.02639	3.75876	1.9875											2.37414	1	Myelin protein zero-like protein 1 OS=Homo sapiens OX=9606 GN=MPZL1 PE=1 SV=1	N-Term(TMT6plex); S3(Phospho); [Y]6(Phospho)
	LYN	3.30931	0.314396	2.45824	3.69106	2.81584						3.86686	2.25853	0.298997	2.27833	2.43619						2.37278	2	Tyrosine-protein kinase Lyn OS=Homo sapiens OX=9606 GN=LYN PE=1 SV=3	N-Term(TMT6plex); [Y]5(Phospho); K13(TMT6plex)
	CD247	1.74297	3.37932	1.79835	3.78692	3.41053						2.25541	0.688057	3.5563	1.27246	2.28186	2.22429	4.05756	2.20364	0.777411	2.05158	2.36578	3	T-cell surface glycoprotein CD3 zeta chain OS=Homo sapiens OX=9606 GN=CD247 PE=1 SV=2	N-Term(TMT6plex); [Y]6(Phospho); K14(TMT6plex)
	ADAM9	3.12456	1.12739	2.65372	4.4998	4.00321	1.85564	0.531101	1.7759	3.73719	1.83732	3.19794	2.87804	2.28277	2.8255	2.4439	3.04547	0.484237	1.51811	0.542023	2.70479	2.35343	4	Disintegrin and metalloproteinase domain-containing protein 9 OS=Homo sapiens OX=9606 GN=ADAM9 PE=1 SV=1	N-Term(TMT6plex); [Y]5(Phospho)
	MCEMP1	2.90031	1.32096	1.51259	3.43084	2.5815																2.34924	1	Mast cell-expressed membrane protein 1 OS=Homo sapiens OX=9606 GN=MCEMP1 PE=1 SV=1	N-Term(TMT6plex); [Y]9(Phospho); K17(TMT6plex)
	CTNNA1						2.61059	1.63393	3.31847	3.0406	3.56408						2.87167	1.87683	-0.446809	2.2455	2.6596	2.33745	2	Catenin alpha-1 OS=Homo sapiens OX=9606 GN=CTNNA1 PE=1 SV=1	N-Term(TMT6plex); [Y]3(Phospho)
	DSC3						1.4771	1.53268	2.02549	2.29208	4.3576											2.33699	1	Desmocollin-3 OS=Homo sapiens OX=9606 GN=DSC3 PE=1 SV=3; Desmocollin-2 OS=Homo sapiens OX=9606 GN=DSC2 PE=1 SV=1	N-Term(TMT6plex); [Y]3(Phospho)
	DDR1	1.4768	1.96131	1.64203	2.46291	3.9834																2.30529	1	Epithelial discoidin domain-containing receptor 1 OS=Homo sapiens OX=9606 GN=DDR1 PE=1 SV=1	N-Term(TMT6plex); [Y]8(Phospho)
	PIK3AP1	2.41514	1.58392	1.94874	2.47435	3.06094																2.29662	1	Phosphoinositide 3-kinase adapter protein 1 OS=Homo sapiens OX=9606 GN=PIK3AP1 PE=1 SV=2	N-Term(TMT6plex); [Y]9(Phospho)
	WAS	2.50719	1.14628	1.88777	3.09925	3.4914						2.94658	0.6336	1.81723	2.09833	3.1376						2.27652	2	Wiskott-Aldrich syndrome protein OS=Homo sapiens OX=9606 GN=WAS PE=1 SV=4	N-Term(TMT6plex); [Y]3(Phospho)
	CDK17											3.42223	3.44076	1.27255	2.15258	1.03522						2.26467	1	Cyclin-dependent kinase 17 OS=Homo sapiens OX=9606 GN=CDK17 PE=1 SV=2; Cyclin-dependent kinase 16 OS=Homo sapiens OX=9606 GN=CDK16 PE=1 SV=1	N-Term(TMT6plex); [Y]6(Phospho); K11(TMT6plex)
	CD247						6.23365	-0.475191	5.82427	2.28409	2.1637						2.06974	1.55287	0.761899	0.162978	2.05235	2.26304	2	T-cell surface glycoprotein CD3 zeta chain OS=Homo sapiens OX=9606 GN=CD247 PE=1 SV=2	N-Term(TMT6plex); [Y]7(Phospho); K12(TMT6plex)
	PIK3AP1	3.10496	2.55959	2.29679	3.29806	2.96233	1.24902	1.55001	1.41787	2.55601	1.62424											2.26189	2	Phosphoinositide 3-kinase adapter protein 1 OS=Homo sapiens OX=9606 GN=PIK3AP1 PE=1 SV=2	N-Term(TMT6plex); [Y]6(Phospho)
	MX1	0.793359	1.62568	1.60082	5.66143	1.48114																2.23249	1	Interferon-induced GTP-binding protein Mx1 OS=Homo sapiens OX=9606 GN=MX1 PE=1 SV=4	N-Term(TMT6plex); K2(TMT6plex); [Y]8(Phospho); K20(TMT6plex)
	KRT18	0.727876	2.53059	1.82045	4.99038	1.07397																2.22865	1	Keratin, type I cytoskeletal 18 OS=Homo sapiens OX=9606 GN=KRT18 PE=1 SV=2	N-Term(TMT6plex); [Y]5(Phospho); K7(TMT6plex)
	ACTN1	1.16436	0.958628	1.37494	5.03515	2.59661																2.22594	1	Alpha-actinin-1 OS=Homo sapiens OX=9606 GN=ACTN1 PE=1 SV=2; Alpha-actinin-4 OS=Homo sapiens OX=9606 GN=ACTN4 PE=1 SV=2	N-Term(TMT6plex); [Y]9(Phospho); C10(Carbamidomethyl)
	PLIN3	2.10802	1.40363	2.62064	2.22704	2.67241																2.20635	1	Perilipin-3 OS=Homo sapiens OX=9606 GN=PLIN3 PE=1 SV=3	N-Term(TMT6plex); [Y]11(Phospho)
	EPHA2	3.84853	2.23139	3.21126	4.56809	5.49331	0.226744	-0.725233	0.636321	0.370342	1.64695	2.2874	2.97664	0.785357	3.3154	2.16814						2.20271	3	Ephrin type-A receptor 2 OS=Homo sapiens OX=9606 GN=EPHA2 PE=1 SV=2	N-Term(TMT6plex); [Y]7(Phospho); K10(TMT6plex)
	CHMP1A	1.59322	1.55004	2.71619	2.48716	2.62607																2.19454	1	Charged multivesicular body protein 1a OS=Homo sapiens OX=9606 GN=CHMP1A PE=1 SV=1	N-Term(TMT6plex); [Y]2(Phospho)
	GSDMD	1.78004	2.32958	1.60197	3.75622	1.50028																2.19362	1	Gasdermin-D OS=Homo sapiens OX=9606 GN=GSDMD PE=1 SV=1	N-Term(TMT6plex); [Y]7(Phospho); K17(TMT6plex)
	MUC1	1.84346	2.40398	1.95017	2.72112	2.039																2.19155	1	Mucin-1 OS=Homo sapiens OX=9606 GN=MUC1 PE=1 SV=3	N-Term(TMT6plex); [Y]9(Phospho)
	CRK	0.820972	1.72653	2.06268	4.79979	1.54616																2.19123	1	Adapter molecule crk OS=Homo sapiens OX=9606 GN=CRK PE=1 SV=2	N-Term(TMT6plex); [Y]9(Phospho)
	LSR						3.58321	2.97082	3.51046	3.35255	3.4201						1.48452	1.20924	-0.458202	1.81305	1.02628	2.1912	2	Lipolysis-stimulated lipoprotein receptor OS=Homo sapiens OX=9606 GN=LSR PE=1 SV=4	N-Term(TMT6plex); [Y]10(Phospho)
	ATP1A1	6.23365	-0.475191	5.82427	2.28409	2.1637	3.01546	2.40579	2.87752	3.50726	3.88457	1.88576	1.6118	-0.422911	1.05747	0.321683	0.930777	0.586092	3.23415	1.60061	1.23756	2.18821	4	Sodium/potassium-transporting ATPase subunit alpha-1 OS=Homo sapiens OX=9606 GN=ATP1A1 PE=1 SV=1	N-Term(TMT6plex); [Y]5(Phospho)
	CLDN4	3.7064	0.859471	3.20203	3.0146	4.09654	1.57619	1.03291	1.58217	0.298693	2.91	2.47389	2.66328	1.90104	2.60782	1.95629	2.87473	2.36069	-0.616026	2.38706	2.83484	2.18613	4	Claudin-4 OS=Homo sapiens OX=9606 GN=CLDN4 PE=1 SV=1	N-Term(TMT6plex); [Y]7(Phospho)
	DSP	1.89567	0.339143	2.85144	2.15073	3.62345																2.17209	1	Desmoplakin OS=Homo sapiens OX=9606 GN=DSP PE=1 SV=3	N-Term(TMT6plex); [Y]4(Phospho); K15(TMT6plex)
	KCT2	1.74135	1.25435	1.92372	3.76605	2.07407																2.15191	1	Keratinocyte-associated transmembrane protein 2 OS=Homo sapiens OX=9606 GN=KCT2 PE=1 SV=2	N-Term(TMT6plex); [Y]5(Phospho)
	EPHB4	3.01546	2.40579	2.87752	3.50726	3.88457	1.20867	0.177327	0.559602	3.11373	0.756017											2.1506	2	Ephrin type-B receptor 4 OS=Homo sapiens OX=9606 GN=EPHB4 PE=1 SV=2	N-Term(TMT6plex); [Y]6(Phospho); K8(TMT6plex)
	CDK2	1.90086	0.964853	2.77244	2.38856	1.71421						2.9817	3.26552	1.44578	2.19004	1.80689						2.14309	2	Cyclin-dependent kinase 2 OS=Homo sapiens OX=9606 GN=CDK2 PE=1 SV=2; Cyclin-dependent kinase 1 OS=Homo sapiens OX=9606 GN=CDK1 PE=1 SV=3; Cyclin-dependent kinase 3 OS=Homo sapiens OX=9606 GN=CDK3 PE=1 SV=1	N-Term(TMT6plex); [Y]10(Phospho); K11(TMT6plex)
	MUC1	2.12577	2.06241	1.83086	2.8393	1.65886																2.10344	1	Mucin-1 OS=Homo sapiens OX=9606 GN=MUC1 PE=1 SV=3	N-Term(TMT6plex); [Y]3(Phospho)
	FCER1G	2.21968	2.06374	1.34313	3.03705	2.17768						3.41518	0.377954	2.38462	1.34582	2.61821						2.09831	2	High affinity immunoglobulin epsilon receptor subunit gamma OS=Homo sapiens OX=9606 GN=FCER1G PE=1 SV=1	N-Term(TMT6plex); [Y]5(Phospho); K9(TMT6plex); K12(TMT6plex)
	GPRC5A																2.19203	2.69559	1.33553	1.26591	2.97252	2.09231	1	Retinoic acid-induced protein 3 OS=Homo sapiens OX=9606 GN=GPRC5A PE=1 SV=2	N-Term(TMT6plex); [Y]8(Phospho); K9(TMT6plex); K14(TMT6plex)
	EPHB1																-0.16558	2.08981	2.22002	1.69826	4.55523	2.07955	1	Ephrin type-B receptor 1 OS=Homo sapiens OX=9606 GN=EPHB1 PE=1 SV=1; Ephrin type-B receptor 2 OS=Homo sapiens OX=9606 GN=EPHB2 PE=1 SV=5	N-Term(TMT6plex); [Y]8(Phospho)
	NUCB2	1.86568	1.77491	1.52747	2.11981	3.08685																2.07494	1	Nucleobindin-2 OS=Homo sapiens OX=9606 GN=NUCB2 PE=1 SV=3	N-Term(TMT6plex); [Y]9(Phospho); K11(TMT6plex)
	BCAR1	2.26856	1.29482	2.55569	2.16905	2.00012																2.05765	1	Breast cancer anti-estrogen resistance protein 1 OS=Homo sapiens OX=9606 GN=BCAR1 PE=1 SV=2	N-Term(TMT6plex); [Y]7(Phospho)
	VIM	2.76272	1.87753	2.3943	2.9967	3.21056	1.18185	1.54738	1.79682	2.51295	1.01077	1.52171	2.10713	2.14351	2.05728	2.42982	2.44049	2.41986	0.575482	2.16127	1.90167	2.05249	4	Vimentin OS=Homo sapiens OX=9606 GN=VIM PE=1 SV=4	N-Term(TMT6plex); [Y]4(Phospho); K7(TMT6plex)
	CFL1	1.71837	2.37967	2.02639	3.75876	1.9875						1.47921	1.30538	0.978057	2.50384	2.2009						2.03381	2	Cofilin-1 OS=Homo sapiens OX=9606 GN=CFL1 PE=1 SV=3	N-Term(TMT6plex); C7(Carbamidomethyl); [Y]8(Phospho); K12(TMT6plex)
	EPS8	4.36152	1.57712	3.52682	1.92646	2.79819	0.456119	-0.70303	1.83143	0.296186	1.18357	2.5825	2.81195	2.41399	3.1203	2.01095						2.01294	3	Epidermal growth factor receptor kinase substrate 8 OS=Homo sapiens OX=9606 GN=EPS8 PE=1 SV=1	N-Term(TMT6plex); [Y]5(Phospho); K11(TMT6plex)
	ITSN2	1.93941	2.97943	2.58953	4.37955	4.40077	0.629073	0.35997	0.654386	1.06232	0.400893	2.79544	1.75111	2.84064	1.31094	2.55765	1.69093	2.44351	1.56466	1.17127	2.69841	2.01099	4	Intersectin-2 OS=Homo sapiens OX=9606 GN=ITSN2 PE=1 SV=3	N-Term(TMT6plex); [Y]7(Phospho); K12(TMT6plex)
	GPRC5A	3.57931	1.1985	3.1349	2.13285	2.90989	1.82945	0.176016	0.910468	1.77946	2.35774											2.00086	2	Retinoic acid-induced protein 3 OS=Homo sapiens OX=9606 GN=GPRC5A PE=1 SV=2	N-Term(TMT6plex); [Y]2(Phospho); K35(TMT6plex)
	TEC	1.76327	0.812496	2.07229	2.54895	2.80146																1.99969	1	Tyrosine-protein kinase Tec OS=Homo sapiens OX=9606 GN=TEC PE=1 SV=2	N-Term(TMT6plex); [Y]7(Phospho); K14(TMT6plex)
	BTK	2.05375	1.08805	1.96257	2.98392	1.87053																1.99176	1	Tyrosine-protein kinase BTK OS=Homo sapiens OX=9606 GN=BTK PE=1 SV=3	N-Term(TMT6plex); [Y]7(Phospho); K14(TMT6plex)
	LSR	3.43992	0.356726	3.44513	3.43492	4.02276											-0.226327	0.0610301	0.857382	2.0463	2.4679	1.99057	2	Lipolysis-stimulated lipoprotein receptor OS=Homo sapiens OX=9606 GN=LSR PE=1 SV=4	N-Term(TMT6plex); [Y]3(Phospho); K7(TMT6plex)
	PLA2G4A	0.793736	1.45644	2.02711	3.0909	2.57414																1.98847	1	Cytosolic phospholipase A2 OS=Homo sapiens OX=9606 GN=PLA2G4A PE=1 SV=2	N-Term(TMT6plex); [Y]2(Phospho); K8(TMT6plex)
	GPRC5C	5.02485	1.44557	2.46359	2.23472	4.31368	0.594323	1.02665	0.793503	2.1709	1.73137						0.667812	1.5716	2.98753	0.737198	1.95851	1.98145	3	G-protein coupled receptor family C group 5 member C OS=Homo sapiens OX=9606 GN=GPRC5C PE=1 SV=2	N-Term(TMT6plex); [Y]4(Phospho); K9(TMT6plex)
	MXRA8	2.11322	1.84532	2.19735	2.08823	3.80864											2.70079	1.24178	1.08774	1.27268	1.44154	1.97973	2	Matrix remodeling-associated protein 8 OS=Homo sapiens OX=9606 GN=MXRA8 PE=1 SV=1	N-Term(TMT6plex); [Y]1(Phospho); K6(TMT6plex)
	SPTAN1	1.21427	1.57308	1.89112	3.90311	1.27297																1.97091	1	Spectrin alpha chain, non-erythrocytic 1 OS=Homo sapiens OX=9606 GN=SPTAN1 PE=1 SV=3	N-Term(TMT6plex); [Y]9(Phospho)
	DEFA1	3.44058	3.56994	2.3177	3.4535	3.09526	1.26095	1.38727	1.69136	1.70773	1.91604	1.80313	2.56851	0.802805	3.61274	2.2661	2.19833	1.59648	-0.445621	2.05647	-0.902294	1.96985	4	Neutrophil defensin 1 OS=Homo sapiens OX=9606 GN=DEFA1 PE=1 SV=1; Neutrophil defensin 3 OS=Homo sapiens OX=9606 GN=DEFA3 PE=1 SV=1	N-Term(TMT6plex); [Y]1(Phospho); C4(Carbamidomethyl)
	SDC4						2.92879	1.06648	1.94873	2.03541	3.78192	1.24763	2.07678	2.51048	1.15336	0.946695						1.96963	2	Syndecan-4 OS=Homo sapiens OX=9606 GN=SDC4 PE=1 SV=2	N-Term(TMT6plex); [Y]7(Phospho)
	CD3E	2.21554	2.55525	2.30422	4.03301	3.55631	2.49275	-0.00890583	0.960529	0.689902	1.19011						1.99848	2.74396	2.17938	1.00226	1.52645	1.96262	3	T-cell surface glycoprotein CD3 epsilon chain OS=Homo sapiens OX=9606 GN=CD3E PE=1 SV=2	N-Term(TMT6plex); [Y]3(Phospho)
	FAM20B	2.07254	1.92306	2.16482	1.92698	1.7218																1.96184	1	Glycosaminoglycan xylosylkinase OS=Homo sapiens OX=9606 GN=FAM20B PE=1 SV=1	N-Term(TMT6plex); [Y]9(Phospho)
	PRAG1						2.53617	1.73749	1.31776	2.60397	1.59833											1.95874	1	Inactive tyrosine-protein kinase PRAG1 OS=Homo sapiens OX=9606 GN=PRAG1 PE=1 SV=4	N-Term(TMT6plex); [Y]9(Phospho); K14(TMT6plex)
	MUC12	2.5439	0.514005	0.25649	1.80735	3.47499	2.08771	1.04245	2.21185	2.52031	3.09931											1.95584	2	Mucin-12 OS=Homo sapiens OX=9606 GN=MUC12 PE=1 SV=2	N-Term(TMT6plex); [Y]3(Phospho)
	RPLP0											0.993266	1.59821	1.30004	3.43092	2.44592						1.95367	1	60S acidic ribosomal protein P0 OS=Homo sapiens OX=9606 GN=RPLP0 PE=1 SV=1; 60S acidic ribosomal protein P0-like OS=Homo sapiens OX=9606 GN=RPLP0P6 PE=5 SV=1	N-Term(TMT6plex); [Y]8(Phospho); K10(TMT6plex)
	SHB																1.56645	1.7738	0.707546	1.36698	4.33611	1.95018	1	SH2 domain-containing adapter protein B OS=Homo sapiens OX=9606 GN=SHB PE=1 SV=2	N-Term(TMT6plex); K2(TMT6plex); [Y]9(Phospho); K16(TMT6plex)
	KRT75	3.31215	1.57504	2.16798	5.34101	2.68795	0.336918	0.838181	0.751783	1.96643	0.508051											1.94855	2	Keratin, type II cytoskeletal 75 OS=Homo sapiens OX=9606 GN=KRT75 PE=1 SV=2; Keratin, type II cytoskeletal 8 OS=Homo sapiens OX=9606 GN=KRT8 PE=1 SV=7	N-Term(TMT6plex); [Y]3(Phospho)
	EML4	1.85564	0.531101	1.7759	3.73719	1.83732																1.94743	1	Echinoderm microtubule-associated protein-like 4 OS=Homo sapiens OX=9606 GN=EML4 PE=1 SV=3	N-Term(TMT6plex); [Y]10(Phospho); K12(TMT6plex)
	YES1	2.61059	1.63393	3.31847	3.0406	3.56408						1.36927	1.64816	1.55148	1.98373	1.97408	1.80777	0.302756	1.42045	1.54388	1.39713	1.94442	3	Tyrosine-protein kinase Yes OS=Homo sapiens OX=9606 GN=YES1 PE=1 SV=3; Tyrosine-protein kinase Fyn OS=Homo sapiens OX=9606 GN=FYN PE=1 SV=3; Tyrosine-protein kinase Fgr OS=Homo sapiens OX=9606 GN=FGR PE=1 SV=2	N-Term(TMT6plex); [Y]3(Phospho)
	EEF1A1	1.70097	2.26486	1.58325	2.46979	1.6827																1.94031	1	Elongation factor 1-alpha 1 OS=Homo sapiens OX=9606 GN=EEF1A1 PE=1 SV=1; Putative elongation factor 1-alpha-like 3 OS=Homo sapiens OX=9606 GN=EEF1A1P5 PE=5 SV=1	N-Term(TMT6plex); [Y]2(Phospho)
	TSG101	4.23485	1.78031	3.10239	2.08458	4.31268	1.03815	0.859555	1.47558	0.958443	0.928501	1.72597	3.40174	1.65192	1.47421	1.05447	2.94093	1.36211	0.0457969	1.97419	2.11597	1.92612	4	Tumor susceptibility gene 101 protein OS=Homo sapiens OX=9606 GN=TSG101 PE=1 SV=2	N-Term(TMT6plex); K1(TMT6plex); [Y]9(Phospho)
	FAM20B	2.53617	1.73749	1.31776	2.60397	1.59833	3.31215	1.57504	2.16798	5.34101	2.68795						0.588414	0.927432	-0.821722	1.65263	1.61618	1.92272	3	Glycosaminoglycan xylosylkinase OS=Homo sapiens OX=9606 GN=FAM20B PE=1 SV=1	N-Term(TMT6plex); [Y]12(Phospho)
	MUC13											1.75143	4.01218	0.833683	1.72013	1.24951						1.91339	1	Mucin-13 OS=Homo sapiens OX=9606 GN=MUC13 PE=1 SV=3	N-Term(TMT6plex); [Y]8(Phospho)
	SERINC5	4.67283	2.19534	2.57532	2.96612	4.85802	0.42682	0.00878572	0.23194	0.911452	0.112938	2.09359	3.90468	0.427222	2.98096	1.55921	3.21552	2.14308	0.456649	2.00522	0.425972	1.90858	4	Serine incorporator 5 OS=Homo sapiens OX=9606 GN=SERINC5 PE=2 SV=1	N-Term(TMT6plex); [Y]1(Phospho)
	EPS8L3	2.66151	1.42785	2.19051	1.8666	1.73269	1.76516	2.06834	1.82406	2.10081	1.43428											1.90718	2	Epidermal growth factor receptor kinase substrate 8-like protein 3 OS=Homo sapiens OX=9606 GN=EPS8L3 PE=1 SV=2	N-Term(TMT6plex); [Y]1(Phospho)
	LTF	3.09186	2.57685	2.02269	4.13558	1.61459	2.21968	2.06374	1.34313	3.03705	2.17768	1.16289	2.56085	0.439099	2.66491	1.85162	2.34674	1.63868	-0.260679	1.38679	-0.124566	1.89746	4	Lactotransferrin OS=Homo sapiens OX=9606 GN=LTF PE=1 SV=6	N-Term(TMT6plex); [Y]4(Phospho)
	LYN	4.07506	3.78291	2.65908	3.7599	2.95962	-0.413657	-1.70133	0.85541	1.39124	0.402866	3.41495	1.93277	2.10981	1.96264	2.26996	2.107	1.54156	1.10951	0.886842	2.58887	1.88475	4	Tyrosine-protein kinase Lyn OS=Homo sapiens OX=9606 GN=LYN PE=1 SV=3; Tyrosine-protein kinase HCK OS=Homo sapiens OX=9606 GN=HCK PE=1 SV=5	N-Term(TMT6plex); [Y]7(Phospho)
	ESYT2	1.7818	0.78627	2.19686	2.46842	2.16739																1.88015	1	Extended synaptotagmin-2 OS=Homo sapiens OX=9606 GN=ESYT2 PE=1 SV=1	N-Term(TMT6plex); [Y]13(Phospho)
	CLDN2	3.06474	1.77967	1.85632	3.42804	2.49105	3.06518	2.38171	2.83983	4.06886	4.70139	0.876189	1.51393	0.798988	0.875682	0.0164664	2.36067	0.407443	-0.0288025	-0.0924398	1.04193	1.87234	4	Claudin-2 OS=Homo sapiens OX=9606 GN=CLDN2 PE=1 SV=1	N-Term(TMT6plex); [Y]7(Phospho)
	PRKCD	2.30687	2.45934	2.73079	3.18712	3.54445											-0.92747	-0.00424014	-0.119359	1.95865	3.54761	1.86838	2	Protein kinase C delta type OS=Homo sapiens OX=9606 GN=PRKCD PE=1 SV=2	N-Term(TMT6plex); [Y]15(Phospho); K17(TMT6plex)
	LYN											1.28275	2.25147	1.23069	2.59666	1.9241						1.85713	1	Tyrosine-protein kinase Lyn OS=Homo sapiens OX=9606 GN=LYN PE=1 SV=3	N-Term(TMT6plex); [Y]25(Phospho)
	YES1	2.70057	2.1223	2.13368	2.41063	3.08103											2.22346	0.854912	0.913785	0.657155	1.39612	1.84936	2	Tyrosine-protein kinase Yes OS=Homo sapiens OX=9606 GN=YES1 PE=1 SV=3; Tyrosine-protein kinase Fyn OS=Homo sapiens OX=9606 GN=FYN PE=1 SV=3; Proto-oncogene tyrosine-protein kinase Src OS=Homo sapiens OX=9606 GN=SRC PE=1 SV=3	N-Term(TMT6plex); [Y]9(Phospho)
	EFNB1	2.99062	1.84888	2.5851	2.28161	4.47179	0.632779	0.23203	1.54277	0.693107	1.42313						1.56933	2.83169	-0.15126	2.02992	2.6766	1.84387	3	Ephrin-B1 OS=Homo sapiens OX=9606 GN=EFNB1 PE=1 SV=1	N-Term(TMT6plex); C7(Carbamidomethyl); [Y]10(Phospho); K12(TMT6plex)
	LMO7	1.76516	2.06834	1.82406	2.10081	1.43428																1.83853	1	LIM domain only protein 7 OS=Homo sapiens OX=9606 GN=LMO7 PE=1 SV=3	N-Term(TMT6plex); [Y]5(Phospho); C6(Carbamidomethyl); C9(Carbamidomethyl)
	PIK3R1	1.4589	1.88594	1.44136	1.71262	2.67784																1.83533	1	Phosphatidylinositol 3-kinase regulatory subunit alpha OS=Homo sapiens OX=9606 GN=PIK3R1 PE=1 SV=2; Phosphatidylinositol 3-kinase regulatory subunit gamma OS=Homo sapiens OX=9606 GN=PIK3R3 PE=1 SV=2	N-Term(TMT6plex); [Y]5(Phospho)
	EPHA6						1.31454	2.15114	-1.16509	5.21014	1.61601											1.82535	1	Ephrin type-A receptor 6 OS=Homo sapiens OX=9606 GN=EPHA6 PE=2 SV=3; Ephrin type-A receptor 4 OS=Homo sapiens OX=9606 GN=EPHA4 PE=1 SV=1; Ephrin type-B receptor 1 OS=Homo sapiens OX=9606 GN=EPHB1 PE=1 SV=1; Ephrin type-B receptor 3 OS=Homo sapiens OX=9606 GN=EPHB3 PE=1 SV=2	N-Term(TMT6plex); [Y]9(Phospho)
	HDLBP	1.31454	2.15114	-1.16509	5.21014	1.61601																1.82535	1	Vigilin OS=Homo sapiens OX=9606 GN=HDLBP PE=1 SV=2	N-Term(TMT6plex); [Y]3(Phospho); K11(TMT6plex)
	KRT19	1.39861	1.76513	1.56642	3.14915	1.23895																1.82365	1	Keratin, type I cytoskeletal 19 OS=Homo sapiens OX=9606 GN=KRT19 PE=1 SV=4	N-Term(TMT6plex); [Y]6(Phospho)
	PDZK1IP1	3.92608	4.10498	3.37731	3.58616	3.61591	0.101012	-0.712329	-0.299667	-0.416473	-0.682395	1.40978	2.99363	1.54736	2.07873	1.62206	-0.387255	4.41041	-1.14102	3.43506	3.72337	1.81464	4	PDZK1-interacting protein 1 OS=Homo sapiens OX=9606 GN=PDZK1IP1 PE=1 SV=1	N-Term(TMT6plex); [Y]8(Phospho); K17(TMT6plex)
	ICK	4.10437	2.52	3.44771	2.20167	2.80361	0.872727	1.65778	1.75219	1.19118	1.0883	1.13968	1.38868	0.972749	2.94846	1.60895	1.00783	1.43982	-0.361117	2.49005	1.9488	1.81117	4	Serine/threonine-protein kinase ICK OS=Homo sapiens OX=9606 GN=ICK PE=1 SV=1	N-Term(TMT6plex); K2(TMT6plex); T6(Phospho); [Y]8(Phospho)
	TJP2	3.29341	2.30615	1.83429	2.25514	2.44681	1.10832	-0.174268	0.960922	1.74915	2.18497	2.81289	2.02108	1.55653	1.19287	2.17431	0.645777	2.42094	0.0269909	1.64488	3.58182	1.80215	4	Tight junction protein ZO-2 OS=Homo sapiens OX=9606 GN=TJP2 PE=1 SV=2	N-Term(TMT6plex); [Y]5(Phospho); K10(TMT6plex)
	SKAP1																1.37132	2.89384	0.710864	1.22664	2.73232	1.787	1	Src kinase-associated phosphoprotein 1 OS=Homo sapiens OX=9606 GN=SKAP1 PE=1 SV=3	N-Term(TMT6plex); K6(TMT6plex); [Y]12(Phospho)
	CTNND1	1.87314	1.52576	0.867695	2.24054	2.39261																1.77995	1	Catenin delta-1 OS=Homo sapiens OX=9606 GN=CTNND1 PE=1 SV=1	N-Term(TMT6plex); [Y]4(Phospho)
	ACTN1	1.40795	2.38566	-3.49393	6.72379	1.82716																1.77013	1	Alpha-actinin-1 OS=Homo sapiens OX=9606 GN=ACTN1 PE=1 SV=2; Alpha-actinin-3 OS=Homo sapiens OX=9606 GN=ACTN3 PE=1 SV=2; Alpha-actinin-4 OS=Homo sapiens OX=9606 GN=ACTN4 PE=1 SV=2	N-Term(TMT6plex); [Y]1(Phospho); K6(TMT6plex)
	FLNB																2.21531	1.53842	1.28268	1.22762	2.5854	1.76988	1	Filamin-B OS=Homo sapiens OX=9606 GN=FLNB PE=1 SV=2	N-Term(TMT6plex); [Y]10(Phospho); K15(TMT6plex)
	CSTF1	1.36563	0.957305	1.78783	3.51355	1.21394																1.76765	1	Cleavage stimulation factor subunit 1 OS=Homo sapiens OX=9606 GN=CSTF1 PE=1 SV=1	N-Term(TMT6plex); [Y]11(Phospho)
	MPP5	2.45562	1.32339	1.94817	3.06451	3.5109	1.4788	0.763793	1.73887	2.41876	2.195	1.73339	1.54713	1.32513	0.92238	1.74503	0.445348	1.43356	0.506675	2.26423	2.4193	1.762	4	MAGUK p55 subfamily member 5 OS=Homo sapiens OX=9606 GN=MPP5 PE=1 SV=3	N-Term(TMT6plex); [Y]2(Phospho); K14(TMT6plex)
	STX4	1.54203	0.500679	2.40909	2.07844	2.27714																1.76148	1	Syntaxin-4 OS=Homo sapiens OX=9606 GN=STX4 PE=1 SV=2	N-Term(TMT6plex); [Y]8(Phospho)
	KRT18	1.79045	2.00557	0.0680334	5.21649	1.39261											1.91267	2.00319	0.328312	0.88156	1.9913	1.75902	2	Keratin, type I cytoskeletal 18 OS=Homo sapiens OX=9606 GN=KRT18 PE=1 SV=2	N-Term(TMT6plex); [Y]4(Phospho)
	FYB1	2.52061	0.804514	1.98174	3.23324	2.51015	4.23485	1.78031	3.10239	2.08458	4.31268	2.27333	-0.0143266	1.79612	1.37683	1.40133	1.3169	0.19597	0.383354	-0.390197	0.160055	1.75322	4	FYN-binding protein 1 OS=Homo sapiens OX=9606 GN=FYB1 PE=1 SV=2	N-Term(TMT6plex); [Y]8(Phospho); K12(TMT6plex)
	CLDN3	3.33373	2.57166	3.97466	2.93975	4.91664	-1.63311	-0.134545	-0.0299109	0.768625	-0.263065						1.60339	3.18305	-0.297949	2.7457	2.55686	1.74903	3	Claudin-3 OS=Homo sapiens OX=9606 GN=CLDN3 PE=1 SV=1	N-Term(TMT6plex); [Y]12(Phospho)
	FCER1G	3.07665	2.83074	2.24904	4.22675	2.72011	1.01324	-0.180191	0.402835	1.28537	0.322327	3.21854	1.77215	1.94399	1.6863	2.3127	1.77925	1.6629	1.0845	1.17855	0.369048	1.74774	4	High affinity immunoglobulin epsilon receptor subunit gamma OS=Homo sapiens OX=9606 GN=FCER1G PE=1 SV=1	N-Term(TMT6plex); [Y]5(Phospho)
	TNS1	2.40282	2.13453	2.15603	0.991594	0.979082																1.73281	1	Tensin-1 OS=Homo sapiens OX=9606 GN=TNS1 PE=1 SV=2	N-Term(TMT6plex); [Y]7(Phospho); S18(Phospho)
	VIL1	1.16691	1.1485	0.840939	3.502	2.00507																1.73269	1	Villin-1 OS=Homo sapiens OX=9606 GN=VIL1 PE=1 SV=4	N-Term(TMT6plex); [Y]2(Phospho); K16(TMT6plex)
	EPS8L3	4.54933	0.823984	3.0844	2.5651	3.17514	0.686438	1.1812	1.18358	2.18933	0.373086	2.58016	3.0592	2.65162	1.40269	0.818957	-0.00365252	3.13522	-0.798686	-0.163761	2.14596	1.73196	4	Epidermal growth factor receptor kinase substrate 8-like protein 3 OS=Homo sapiens OX=9606 GN=EPS8L3 PE=1 SV=2	N-Term(TMT6plex); [Y]3(Phospho)
	PECAM1	2.08771	1.04245	2.21185	2.52031	3.09931	1.02974	2.50286	-0.539491	6.24223	2.2458	2.76768	0.448098	1.24653	1.11287	1.8707	0.121938	1.61294	0.754331	0.965848	1.24377	1.72937	4	Platelet endothelial cell adhesion molecule OS=Homo sapiens OX=9606 GN=PECAM1 PE=1 SV=2	N-Term(TMT6plex); [Y]6(Phospho)
	DEFA1	2.96719	3.06009	2.03194	3.00091	2.7447	1.25669	1.40887	1.45442	1.60936	1.83291						2.07025	1.96331	-1.08104	1.6141	-0.108636	1.72167	3	Neutrophil defensin 1 OS=Homo sapiens OX=9606 GN=DEFA1 PE=1 SV=1; Neutrophil defensin 3 OS=Homo sapiens OX=9606 GN=DEFA3 PE=1 SV=1	N-Term(TMT6plex); C4(Carbamidomethyl); [Y]6(Phospho)
	SDCBP	1.4788	0.763793	1.73887	2.41876	2.195																1.71905	1	Syntenin-1 OS=Homo sapiens OX=9606 GN=SDCBP PE=1 SV=1	N-Term(TMT6plex); [Y]8(Phospho)
	EPHB3	2.14173	1.35034	1.54675	1.98621	1.56197																1.7174	1	Ephrin type-B receptor 3 OS=Homo sapiens OX=9606 GN=EPHB3 PE=1 SV=2	N-Term(TMT6plex); [Y]7(Phospho)
	CTPS1	0.607416	1.26114	1.72221	3.29338	1.67527																1.71188	1	CTP synthase 1 OS=Homo sapiens OX=9606 GN=CTPS1 PE=1 SV=2	N-Term(TMT6plex); [Y]7(Phospho)
	DAPP1	0.533414	1.08532	0.202297	2.14939	0.947246	1.20488	2.39818	0.346189	6.28134	2.33555	3.7357	0.65626	1.63122	0.104858	1.98123						1.7062	3	Dual adapter for phosphotyrosine and 3-phosphotyrosine and 3-phosphoinositide OS=Homo sapiens OX=9606 GN=DAPP1 PE=1 SV=1	N-Term(TMT6plex); K1(TMT6plex); [Y]8(Phospho)
	ARPC3	1.93221	1.53782	1.59718	1.96289	1.45827																1.69767	1	Actin-related protein 2/3 complex subunit 3 OS=Homo sapiens OX=9606 GN=ARPC3 PE=1 SV=3	N-Term(TMT6plex); [Y]10(Phospho); K13(TMT6plex)
	ITGB4	1.13922	0.0049192	0.715474	1.92362	1.74287	4.93731	3.61041	2.49898	5.29575	3.73274	0.880176	0.913134	0.392398	0.953656	1.00586	1.57764	0.715246	0.554211	1.84606	-0.804341	1.68177	4	Integrin beta-4 OS=Homo sapiens OX=9606 GN=ITGB4 PE=1 SV=5	N-Term(TMT6plex); C2(Carbamidomethyl); [Y]12(Phospho); C18(Carbamidomethyl)
	PDZK1IP1	3.66562	3.61222	3.22932	2.84242	3.30562	-0.582324	-0.949341	-0.269122	0.43733	0.254338	1.55802	3.04504	1.28213	2.76509	1.68289	-0.400976	3.83244	-0.885119	2.54971	2.65555	1.68154	4	PDZK1-interacting protein 1 OS=Homo sapiens OX=9606 GN=PDZK1IP1 PE=1 SV=1	N-Term(TMT6plex); [Y]8(Phospho); K17(TMT6plex)
	FRK						1.45166	-0.154847	0.652371	1.04481	1.4085						1.2744	2.55231	3.20787	2.6666	2.68264	1.67863	2	Tyrosine-protein kinase FRK OS=Homo sapiens OX=9606 GN=FRK PE=1 SV=1	N-Term(TMT6plex); [Y]4(Phospho); K8(TMT6plex)
	CYSTM1	3.01514	2.84925	2.16439	3.85148	2.88685	-0.536502	0.226554	-0.0551039	1.71993	-0.611489						2.0996	2.90335	-0.122178	1.8327	2.94441	1.67789	3	Cysteine-rich and transmembrane domain-containing protein 1 OS=Homo sapiens OX=9606 GN=CYSTM1 PE=1 SV=1	N-Term(TMT6plex); [Y]4(Phospho)
	INPP5D	1.42492	0.3264	1.89289	2.72182	2.45448	0.820972	1.72653	2.06268	4.79979	1.54616						2.20249	1.2099	0.710859	0.685166	0.379991	1.66434	3	Phosphatidylinositol 3,4,5-trisphosphate 5-phosphatase 1 OS=Homo sapiens OX=9606 GN=INPP5D PE=1 SV=2	N-Term(TMT6plex); [Y]3(Phospho)
	TF						1.02317	2.0814	1.79146	2.16775	1.22642											1.65804	1	Serotransferrin OS=Homo sapiens OX=9606 GN=TF PE=1 SV=3	N-Term(TMT6plex); [Y]6(Phospho); K8(TMT6plex)
	ALOX5	1.67316	1.41885	1.33073	2.49995	1.32787																1.65011	1	Arachidonate 5-lipoxygenase OS=Homo sapiens OX=9606 GN=ALOX5 PE=1 SV=2	N-Term(TMT6plex); [Y]6(Phospho); C11(Carbamidomethyl)
	ANXA1	0.882744	0.84832	2.2825	2.39657	2.55724						2.19673	0.522604	1.90241	1.40516	1.48764						1.64819	2	Annexin A1 OS=Homo sapiens OX=9606 GN=ANXA1 PE=1 SV=2	N-Term(TMT6plex); [Y]12(Phospho); K17(TMT6plex)
	EEF1A1	1.51629	2.31904	1.64363	1.46838	1.27579																1.64463	1	Elongation factor 1-alpha 1 OS=Homo sapiens OX=9606 GN=EEF1A1 PE=1 SV=1; Putative elongation factor 1-alpha-like 3 OS=Homo sapiens OX=9606 GN=EEF1A1P5 PE=5 SV=1	N-Term(TMT6plex); [Y]1(Phospho)
	EPHB1	2.18751	1.16278	0.838465	2.38537	1.6389																1.64261	1	Ephrin type-B receptor 1 OS=Homo sapiens OX=9606 GN=EPHB1 PE=1 SV=1; Ephrin type-B receptor 2 OS=Homo sapiens OX=9606 GN=EPHB2 PE=1 SV=5	N-Term(TMT6plex); [Y]2(Phospho)
	ALB						1.62536	1.58359	1.5582	1.47884	1.95785											1.64077	1	Serum albumin OS=Homo sapiens OX=9606 GN=ALB PE=1 SV=2	N-Term(TMT6plex); [Y]1(Phospho); C3(Carbamidomethyl); K12(TMT6plex)
	EPHB4	4.10178	1.16889	2.64003	3.37481	2.62609	0.168624	0.217556	0.0767991	-0.60364	0.610365						2.72114	1.74937	0.758576	1.15556	3.82074	1.63911	3	Ephrin type-B receptor 4 OS=Homo sapiens OX=9606 GN=EPHB4 PE=1 SV=2; Ephrin type-B receptor 3 OS=Homo sapiens OX=9606 GN=EPHB3 PE=1 SV=2	N-Term(TMT6plex); [Y]2(Phospho)
	PAG1	2.70286	2.01805	2.61277	3.63726	2.85269	1.93221	1.53782	1.59718	1.96289	1.45827	1.97972	0.990785	0.914203	1.1461	1.35438	0.299139	0.569138	0.061523	1.65018	1.47464	1.63759	4	Phosphoprotein associated with glycosphingolipid-enriched microdomains 1 OS=Homo sapiens OX=9606 GN=PAG1 PE=1 SV=2	N-Term(TMT6plex); [Y]4(Phospho)
	SYNPO2	1.10937	1.06878	1.66759	1.98708	2.308																1.62816	1	Synaptopodin-2 OS=Homo sapiens OX=9606 GN=SYNPO2 PE=1 SV=2	N-Term(TMT6plex); [Y]1(Phospho)
	IRS2						4.54933	0.823984	3.0844	2.5651	3.17514	-0.175719	-0.163143	0.139026	1.02186	1.23844						1.62584	2	Insulin receptor substrate 2 OS=Homo sapiens OX=9606 GN=IRS2 PE=1 SV=2	N-Term(TMT6plex); C5(Carbamidomethyl); [Y]12(Phospho)
	PRKCD	1.43862	0.383925	2.35099	2.30269	2.38712	5.02485	1.44557	2.46359	2.23472	4.31368	1.16735	0.49244	-0.75322	2.3796	0.886498	-0.372674	-0.00941932	-0.0556555	1.4474	2.25783	1.5893	4	Protein kinase C delta type OS=Homo sapiens OX=9606 GN=PRKCD PE=1 SV=2	N-Term(TMT6plex); S4(Phospho); [Y]13(Phospho); K18(TMT6plex)
	PI4KA	1.48516	0.161625	1.69108	1.72108	2.76967																1.56572	1	Phosphatidylinositol 4-kinase alpha OS=Homo sapiens OX=9606 GN=PI4KA PE=1 SV=4	N-Term(TMT6plex); [Y]6(Phospho)
	MAPK13	1.76678	2.25404	2.08698	2.13115	1.22059											1.22372	1.87784	-1.13781	1.85311	2.38006	1.56565	2	Mitogen-activated protein kinase 13 OS=Homo sapiens OX=9606 GN=MAPK13 PE=1 SV=1	N-Term(TMT6plex); T7(Phospho); [Y]9(Phospho)
	LPP	-0.968939	0.17486	0.314282	-0.269994	-0.190129	5.07634	2.69634	2.64622	2.2486	3.845											1.55726	2	Lipoma-preferred partner OS=Homo sapiens OX=9606 GN=LPP PE=1 SV=1	N-Term(TMT6plex); [Y]5(Phospho)
	PTPRC	1.59936	1.46538	0.929697	2.07926	1.68114																1.55097	1	Receptor-type tyrosine-protein phosphatase C OS=Homo sapiens OX=9606 GN=PTPRC PE=1 SV=3	N-Term(TMT6plex); [Y]1(Phospho)
	SDCBP	1.67718	1.20511	1.61723	2.40437	2.80538											1.77936	1.30026	-2.84928	2.88663	2.57926	1.54055	2	Syntenin-1 OS=Homo sapiens OX=9606 GN=SDCBP PE=1 SV=1	N-Term(TMT6plex); [Y]2(Phospho)
	SPTBN1	0.781331	1.22175	0.881486	3.09318	1.71961																1.53947	1	Spectrin beta chain, non-erythrocytic 1 OS=Homo sapiens OX=9606 GN=SPTBN1 PE=1 SV=2	N-Term(TMT6plex); [Y]10(Phospho)
	CKB	2.74416	0.467695	1.20183	0.691924	2.5905																1.53922	1	Creatine kinase B-type OS=Homo sapiens OX=9606 GN=CKB PE=1 SV=1	N-Term(TMT6plex); [Y]7(Phospho)
	HSPD1	1.02974	2.50286	-0.539491	6.24223	2.2458						0.417263	1.55809	-0.196189	1.64456	0.476652						1.53815	2	60 kDa heat shock protein, mitochondrial OS=Homo sapiens OX=9606 GN=HSPD1 PE=1 SV=2	N-Term(TMT6plex); C1(Carbamidomethyl); [Y]7(Phospho); K13(TMT6plex)
	CRKL	0.974367	0.792343	1.12405	3.68199	1.05639																1.52583	1	Crk-like protein OS=Homo sapiens OX=9606 GN=CRKL PE=1 SV=1	N-Term(TMT6plex); C5(Carbamidomethyl); [Y]9(Phospho)
	PKM	1.28593	1.1521	-1.50058	4.62751	2.0214																1.51727	1	Pyruvate kinase PKM OS=Homo sapiens OX=9606 GN=PKM PE=1 SV=4	N-Term(TMT6plex); [Y]13(Phospho); K23(TMT6plex)
	VARS	1.39737	2.07071	1.01207	1.66518	1.42913																1.51489	1	Valine--tRNA ligase OS=Homo sapiens OX=9606 GN=VARS PE=1 SV=4	N-Term(TMT6plex); [Y]8(Phospho)
	EFNB2	1.44718	0.490738	1.87504	1.93741	3.32798						1.15434	2.19783	0.412606	2.19789	1.89695	1.92949	0.956833	0.276348	1.27005	1.29763	1.51122	3	Ephrin-B2 OS=Homo sapiens OX=9606 GN=EFNB2 PE=1 SV=1	N-Term(TMT6plex); C7(Carbamidomethyl); [Y]10(Phospho); K12(TMT6plex)
	PRKCD	1.38959	0.468646	3.01116	2.96275	2.43763	0.634866	0.916095	1.81352	1.12451	1.16072	3.67027	1.75962	-1.06846	2.60961	1.02092	0.732378	-0.547599	2.00513	1.22953	2.7637	1.50473	4	Protein kinase C delta type OS=Homo sapiens OX=9606 GN=PRKCD PE=1 SV=2	N-Term(TMT6plex); [Y]13(Phospho); K18(TMT6plex)
	WARS	1.06998	1.26418	1.51065	2.39587	1.26722																1.50158	1	Tryptophan--tRNA ligase, cytoplasmic OS=Homo sapiens OX=9606 GN=WARS PE=1 SV=2	N-Term(TMT6plex); C5(Carbamidomethyl); C9(Carbamidomethyl); [Y]16(Phospho)
	ITSN2	2.17681	1.71639	2.41106	3.49658	2.70227	0.324565	-0.135757	0.649394	0.186872	-0.355896	1.72806	1.42022	2.49013	1.35025	1.80242	1.94244	2.13854	0.492426	0.814906	2.63822	1.4995	4	Intersectin-2 OS=Homo sapiens OX=9606 GN=ITSN2 PE=1 SV=3	N-Term(TMT6plex); [Y]8(Phospho); K13(TMT6plex)
	TSG101	2.74477	1.97408	1.88647	1.97663	2.98674	-0.755109	-0.600977	1.74808	0.134636	2.38418						1.82436	2.06953	-0.112873	2.10441	2.10739	1.49815	3	Tumor susceptibility gene 101 protein OS=Homo sapiens OX=9606 GN=TSG101 PE=1 SV=2	N-Term(TMT6plex); [Y]8(Phospho)
	KRT19	1.18185	1.54738	1.79682	2.51295	1.01077	0.54736	1.02764	1.52248	1.19197	2.63172											1.49709	2	Keratin, type I cytoskeletal 19 OS=Homo sapiens OX=9606 GN=KRT19 PE=1 SV=4	N-Term(TMT6plex); [Y]5(Phospho)
	GPRC5A	2.22799	1.27883	1.67927	0.678948	1.61898																1.4968	1	Retinoic acid-induced protein 3 OS=Homo sapiens OX=9606 GN=GPRC5A PE=1 SV=2	N-Term(TMT6plex); [Y]2(Phospho); T24(Phospho); K35(TMT6plex)
	DDR1	1.51407	1.11773	1.48358	1.41827	1.95001																1.49673	1	Epithelial discoidin domain-containing receptor 1 OS=Homo sapiens OX=9606 GN=DDR1 PE=1 SV=1	N-Term(TMT6plex); C9(Carbamidomethyl); [Y]23(Phospho)
	CAP1	0.206478	-1.06417	0.480853	1.62859	0.663978	4.77756	3.33523	5.20525	5.55577	4.04434	0.212927	0.566579	1.21073	0.381269	0.777228	0.619372	0.0504119	0.825242	0.402989	-0.010039	1.49353	4	Adenylyl cyclase-associated protein 1 OS=Homo sapiens OX=9606 GN=CAP1 PE=1 SV=5	N-Term(TMT6plex); [Y]6(Phospho); K7(TMT6plex)
	TLN2	1.5496	1.19776	1.77768	0.817321	2.09473																1.48742	1	Talin-2 OS=Homo sapiens OX=9606 GN=TLN2 PE=1 SV=4	N-Term(TMT6plex); C2(Carbamidomethyl); [Y]4(Phospho)
	TLN1	1.65881	1.78094	2.14608	3.85519	0.901329						1.83721	1.38976	1.20049	1.62354	1.6201	0.77561	1.56961	-0.13571	0.822189	1.17155	1.48111	3	Talin-1 OS=Homo sapiens OX=9606 GN=TLN1 PE=1 SV=3	N-Term(TMT6plex); [Y]4(Phospho)
	CTNND1						1.28467	1.72587	1.84904	1.35612	1.1481											1.47276	1	Catenin delta-1 OS=Homo sapiens OX=9606 GN=CTNND1 PE=1 SV=1	N-Term(TMT6plex); [Y]6(Phospho)
	SLC25A5	0.451576	-0.737236	2.0284	0.633549	1.74978	1.86568	1.77491	1.52747	2.11981	3.08685											1.45008	2	ADP/ATP translocase 2 OS=Homo sapiens OX=9606 GN=SLC25A5 PE=1 SV=7	N-Term(TMT6plex); [Y]3(Phospho); K11(TMT6plex)
	LYN																1.98422	1.63171	0.852238	1.14358	1.61915	1.44618	1	Tyrosine-protein kinase Lyn OS=Homo sapiens OX=9606 GN=LYN PE=1 SV=3	N-Term(TMT6plex); [Y]2(Phospho)
	ADSL	1.06273	0.347692	0.793874	3.26945	1.69909																1.43457	1	Adenylosuccinate lyase OS=Homo sapiens OX=9606 GN=ADSL PE=1 SV=2	N-Term(TMT6plex); [Y]1(Phospho); C7(Carbamidomethyl)
	SYK	1.34573	1.20444	1.43811	1.77484	1.39071																1.43077	1	Tyrosine-protein kinase SYK OS=Homo sapiens OX=9606 GN=SYK PE=1 SV=1	N-Term(TMT6plex); [Y]3(Phospho)
	THEMIS2	2.42291	2.54092	2.93983	2.50978	2.49424						1.98021	1.30501	1.52348	2.14001	1.98365	0.0946025	-0.199897	-0.829757	0.84209	-0.31066	1.42909	3	Protein THEMIS2 OS=Homo sapiens OX=9606 GN=THEMIS2 PE=1 SV=1	N-Term(TMT6plex); [Y]10(Phospho); K19(TMT6plex)
	EPHB4																0.829769	1.75937	-0.433701	1.28389	3.67778	1.42342	1	Ephrin type-B receptor 4 OS=Homo sapiens OX=9606 GN=EPHB4 PE=1 SV=2; Ephrin type-B receptor 3 OS=Homo sapiens OX=9606 GN=EPHB3 PE=1 SV=2	N-Term(TMT6plex); [Y]2(Phospho); [Y]8(Phospho)
	PLPBP	-0.112286	1.28395	-1.29944	4.42631	2.77986																1.41568	1	Pyridoxal phosphate homeostasis protein OS=Homo sapiens OX=9606 GN=PLPBP PE=1 SV=1	N-Term(TMT6plex); [Y]6(Phospho); K13(TMT6plex)
	PLCG1	0.571722	1.05494	1.18783	2.44923	1.80253																1.41325	1	1-phosphatidylinositol 4,5-bisphosphate phosphodiesterase gamma-1 OS=Homo sapiens OX=9606 GN=PLCG1 PE=1 SV=1	N-Term(TMT6plex); [Y]5(Phospho); K15(TMT6plex)
	EPS8L3	2.1148	2.17326	2.18786	1.6676	1.97255	-0.125822	-0.104214	1.98493	0.650398	1.51495											1.40363	2	Epidermal growth factor receptor kinase substrate 8-like protein 3 OS=Homo sapiens OX=9606 GN=EPS8L3 PE=1 SV=2	N-Term(TMT6plex); [Y]2(Phospho)
	DSP						4.36152	1.57712	3.52682	1.92646	2.79819						0.123686	0.319065	-1.03574	0.207578	0.228833	1.40335	2	Desmoplakin OS=Homo sapiens OX=9606 GN=DSP PE=1 SV=3	N-Term(TMT6plex); S3(Phospho); [Y]9(Phospho)
	YES1						4.07932	0.809662	2.85187	3.33668	2.55495	-0.04682	-0.0894236	0.245232	0.111816	0.168505						1.40218	2	Tyrosine-protein kinase Yes OS=Homo sapiens OX=9606 GN=YES1 PE=1 SV=3; Tyrosine-protein kinase Fyn OS=Homo sapiens OX=9606 GN=FYN PE=1 SV=3	N-Term(TMT6plex); [Y]6(Phospho)
	LSR	3.10824	1.84277	2.80332	2.12871	2.5092	0.595366	0.870691	0.639076	2.57668	0.471979						0.124112	1.72189	-1.57359	0.879017	2.29445	1.39946	3	Lipolysis-stimulated lipoprotein receptor OS=Homo sapiens OX=9606 GN=LSR PE=1 SV=4	N-Term(TMT6plex); [Y]6(Phospho)
	TNS1	1.40726	1.20264	1.78494	1.10567	1.48224																1.39655	1	Tensin-1 OS=Homo sapiens OX=9606 GN=TNS1 PE=1 SV=2	N-Term(TMT6plex); [Y]4(Phospho)
	HSPA7	0.910118	1.34176	1.64156	3.48516	1.6645	0.533414	1.08532	0.202297	2.14939	0.947246											1.39608	2	Putative heat shock 70 kDa protein 7 OS=Homo sapiens OX=9606 GN=HSPA7 PE=5 SV=2; Heat shock 70 kDa protein 6 OS=Homo sapiens OX=9606 GN=HSPA6 PE=1 SV=2; Heat shock-related 70 kDa protein 2 OS=Homo sapiens OX=9606 GN=HSPA2 PE=1 SV=1; Heat shock cognate 71 kDa protein OS=Homo sapiens OX=9606 GN=HSPA8 PE=1 SV=1; Heat shock 70 kDa protein 1A OS=Homo sapiens OX=9606 GN=HSPA1A PE=1 SV=1; Heat shock 70 …	N-Term(TMT6plex); [Y]5(Phospho)
	GLG1	0.947659	1.99832	1.60476	1.84352	0.569104																1.39267	1	Golgi apparatus protein 1 OS=Homo sapiens OX=9606 GN=GLG1 PE=1 SV=2	N-Term(TMT6plex); [Y]1(Phospho); C3(Carbamidomethyl)
	MAPK14	1.29258	1.9657	2.14182	1.46677	1.33553	3.12456	1.12739	2.65372	4.4998	4.00321	0.343859	0.371659	0.730912	1.74995	0.749345	-0.972858	1.75245	-2.51669	0.618222	1.28241	1.38602	4	Mitogen-activated protein kinase 14 OS=Homo sapiens OX=9606 GN=MAPK14 PE=1 SV=3	N-Term(TMT6plex); T7(Phospho); [Y]9(Phospho)
	PTPRF	0.696963	1.25538	1.87737	1.77323	1.3216																1.38491	1	Receptor-type tyrosine-protein phosphatase F OS=Homo sapiens OX=9606 GN=PTPRF PE=1 SV=2; Receptor-type tyrosine-protein phosphatase delta OS=Homo sapiens OX=9606 GN=PTPRD PE=1 SV=2; Receptor-type tyrosine-protein phosphatase S OS=Homo sapiens OX=9606 GN=PTPRS PE=1 SV=3	N-Term(TMT6plex); [Y]1(Phospho)
	LCK	1.51566	0.588854	0.159824	0.731062	0.742853						1.26167	4.8859	2.02307	1.8827	0.0507865						1.38424	2	Tyrosine-protein kinase Lck OS=Homo sapiens OX=9606 GN=LCK PE=1 SV=6	N-Term(TMT6plex); [Y]14(Phospho)
	LYN	0.728655	0.731716	1.44592	2.85479	1.87687						1.90924	1.32718	0.705333	2.70604	1.43265	1.7909	0.292258	1.04713	0.90424	0.966677	1.38131	3	Tyrosine-protein kinase Lyn OS=Homo sapiens OX=9606 GN=LYN PE=1 SV=3	N-Term(TMT6plex); K2(TMT6plex); [Y]27(Phospho)
	CD84											2.43818	-0.103422	1.65649	1.02167	1.87873						1.37833	1	SLAM family member 5 OS=Homo sapiens OX=9606 GN=CD84 PE=1 SV=1	N-Term(TMT6plex); [Y]2(Phospho); K9(TMT6plex)
	LILRB2	0.400912	0.726284	1.24763	3.0607	1.4335																1.37381	1	Leukocyte immunoglobulin-like receptor subfamily B member 2 OS=Homo sapiens OX=9606 GN=LILRB2 PE=1 SV=4; Leukocyte immunoglobulin-like receptor subfamily B member 5 OS=Homo sapiens OX=9606 GN=LILRB5 PE=1 SV=1	N-Term(TMT6plex); [Y]12(Phospho)
	FLNA	0.741342	0.981541	2.10791	1.31181	1.71565																1.37165	1	Filamin-A OS=Homo sapiens OX=9606 GN=FLNA PE=1 SV=4	N-Term(TMT6plex); [Y]1(Phospho)
	LYN	2.50482	1.93011	1.84167	2.1814	3.01332	0.679791	0.579259	0.956819	2.66209	1.10459						1.21731	0.471742	1.18238	1.06127	-0.84912	1.36916	3	Tyrosine-protein kinase Lyn OS=Homo sapiens OX=9606 GN=LYN PE=1 SV=3	N-Term(TMT6plex); C4(Carbamidomethyl); [Y]9(Phospho); K13(TMT6plex)
	PKM	0.830321	-0.60121	-0.261944	3.12635	1.47018	1.93941	2.97943	2.58953	4.37955	4.40077						1.07498	-1.0495	-0.797016	0.312361	0.0988685	1.36614	3	Pyruvate kinase PKM OS=Homo sapiens OX=9606 GN=PKM PE=1 SV=4	N-Term(TMT6plex); [Y]3(Phospho)
	MPZL1	1.02646	0.636578	1.73028	2.24935	1.91597	1.76678	2.25404	2.08698	2.13115	1.22059	1.8811	1.9955	0.0687006	1.50442	1.2435	1.65949	0.404662	-0.139535	0.287478	1.31383	1.36187	4	Myelin protein zero-like protein 1 OS=Homo sapiens OX=9606 GN=MPZL1 PE=1 SV=1	N-Term(TMT6plex); [Y]6(Phospho)
	CDK2						-0.659914	-0.584713	1.26627	1.8336	1.42836	3.5926	3.80524	1.32141	2.03587	0.804386	1.61628	1.00201	0.110154	0.372859	2.39849	1.35619	3	Cyclin-dependent kinase 2 OS=Homo sapiens OX=9606 GN=CDK2 PE=1 SV=2; Cyclin-dependent kinase 1 OS=Homo sapiens OX=9606 GN=CDK1 PE=1 SV=3; Cyclin-dependent kinase 3 OS=Homo sapiens OX=9606 GN=CDK3 PE=1 SV=1	N-Term(TMT6plex); [Y]6(Phospho); K11(TMT6plex)
	LIME1											1.29094	0.669875	1.9648	0.777469	2.06967	0.181775	1.78904	1.73217	0.935296	2.10727	1.35183	2	Lck-interacting transmembrane adapter 1 OS=Homo sapiens OX=9606 GN=LIME1 PE=1 SV=1	N-Term(TMT6plex); [Y]13(Phospho)
	SPTAN1	0.965812	1.73499	0.66142	5.61519	1.22418											0.0121868	0.130228	0.378405	1.18867	1.58212	1.34932	2	Spectrin alpha chain, non-erythrocytic 1 OS=Homo sapiens OX=9606 GN=SPTAN1 PE=1 SV=3	N-Term(TMT6plex); [Y]6(Phospho); K15(TMT6plex)
	PRAM1											0.642545	1.18404	0.576334	2.52134	1.80504						1.34586	1	PML-RARA-regulated adapter molecule 1 OS=Homo sapiens OX=9606 GN=PRAM1 PE=1 SV=3	N-Term(TMT6plex); [Y]13(Phospho)
	BRK1	1.64017	1.42072	0.680383	3.53046	0.812962											1.94259	1.57983	-0.042771	1.03712	0.818206	1.34197	2	Protein BRICK1 OS=Homo sapiens OX=9606 GN=BRK1 PE=1 SV=1	N-Term(TMT6plex); [Y]4(Phospho)
	CNN1	1.05759	0.954845	1.98081	1.54448	1.17122																1.34179	1	Calponin-1 OS=Homo sapiens OX=9606 GN=CNN1 PE=1 SV=2	N-Term(TMT6plex); [Y]10(Phospho)
	PIK3R2	1.1206	1.93087	1.47801	1.34204	2.55811	3.49434	3.06588	3.33357	3.71224	4.30652	0.35852	0.490709	-0.137828	1.10056	0.0250565	-1.09334	0.462469	-1.74175	0.785744	0.237943	1.34151	4	Phosphatidylinositol 3-kinase regulatory subunit beta OS=Homo sapiens OX=9606 GN=PIK3R2 PE=1 SV=2	N-Term(TMT6plex); [Y]8(Phospho)
	LDHB	1.43556	0.522259	0.973721	2.19272	1.58213																1.34128	1	L-lactate dehydrogenase B chain OS=Homo sapiens OX=9606 GN=LDHB PE=1 SV=2	N-Term(TMT6plex); [Y]7(Phospho); K11(TMT6plex)
	PTPRE	1.17867	1.66122	2.44109	2.65999	2.68457						1.53526	0.809413	0.633484	1.97017	1.78414	-0.120184	1.41452	-0.305682	0.432508	1.30108	1.33868	3	Receptor-type tyrosine-protein phosphatase epsilon OS=Homo sapiens OX=9606 GN=PTPRE PE=1 SV=1	N-Term(TMT6plex); [Y]12(Phospho); K16(TMT6plex)
	G6PD											1.1876	1.79445	0.669676	1.29621	1.72281						1.33415	1	Glucose-6-phosphate 1-dehydrogenase OS=Homo sapiens OX=9606 GN=G6PD PE=1 SV=4	N-Term(TMT6plex); [Y]5(Phospho); K10(TMT6plex)
	OCIAD1	1.2364	1.83333	0.789912	1.72152	1.0829																1.33281	1	OCIA domain-containing protein 1 OS=Homo sapiens OX=9606 GN=OCIAD1 PE=1 SV=1	N-Term(TMT6plex); [Y]4(Phospho)
	RPL15																1.8941	1.77053	0.0169589	0.829189	2.10291	1.32274	1	60S ribosomal protein L15 OS=Homo sapiens OX=9606 GN=RPL15 PE=1 SV=2	N-Term(TMT6plex); [Y]3(Phospho)
	EEF1A1	1.26915	0.370105	1.88028	1.48183	1.61118																1.32251	1	Elongation factor 1-alpha 1 OS=Homo sapiens OX=9606 GN=EEF1A1 PE=1 SV=1; Putative elongation factor 1-alpha-like 3 OS=Homo sapiens OX=9606 GN=EEF1A1P5 PE=5 SV=1	N-Term(TMT6plex); [Y]5(Phospho); K7(TMT6plex)
	DCBLD1	1.84425	1.13732	1.68351	0.878645	1.00759																1.31026	1	Discoidin, CUB and LCCL domain-containing protein 1 OS=Homo sapiens OX=9606 GN=DCBLD1 PE=1 SV=2	N-Term(TMT6plex); [Y]10(Phospho)
	ALB	1.42061	0.0226585	0.849266	-0.0365406	0.2921	2.12577	2.06241	1.83086	2.8393	1.65886											1.30653	2	Serum albumin OS=Homo sapiens OX=9606 GN=ALB PE=1 SV=2	N-Term(TMT6plex); [Y]3(Phospho); C9(Carbamidomethyl); C10(Carbamidomethyl); K12(TMT6plex)
	VCL	2.26688	1.71288	-2.58612	4.22465	1.66885	1.31585	1.75116	0.814358	1.87932	0.486886	2.12217	2.19916	0.334395	1.81069	1.7064	1.63144	0.651436	0.388127	0.996095	0.703912	1.30393	4	Vinculin OS=Homo sapiens OX=9606 GN=VCL PE=1 SV=4	N-Term(TMT6plex); [Y]7(Phospho)
	LCP1	1.64079	2.69843	0.155483	1.36939	0.534289																1.27968	1	Plastin-2 OS=Homo sapiens OX=9606 GN=LCP1 PE=1 SV=6	N-Term(TMT6plex); [Y]4(Phospho); C11(Carbamidomethyl); K13(TMT6plex)
	PRKCD	2.25191	2.11515	2.11505	2.54181	4.21382	1.0255	-0.845694	-0.122333	-0.705782	-0.37308						1.43418	0.585659	0.827808	1.74352	2.32266	1.27534	3	Protein kinase C delta type OS=Homo sapiens OX=9606 GN=PRKCD PE=1 SV=2	N-Term(TMT6plex); [Y]2(Phospho); K13(TMT6plex)
	PARD3	0.589343	-0.016585	0.870925	2.99683	1.93532																1.27517	1	Partitioning defective 3 homolog OS=Homo sapiens OX=9606 GN=PARD3 PE=1 SV=2	N-Term(TMT6plex); [Y]11(Phospho); K13(TMT6plex)
	EPB41	0.560109	0.811704	1.47944	2.20645	1.29083																1.26971	1	Protein 4.1 OS=Homo sapiens OX=9606 GN=EPB41 PE=1 SV=4	N-Term(TMT6plex); [Y]7(Phospho)
	CR2						0.727876	2.53059	1.82045	4.99038	1.07397	1.84639	0.317398	0.362692	-1.0746	0.0889723						1.26841	2	Complement receptor type 2 OS=Homo sapiens OX=9606 GN=CR2 PE=1 SV=2	N-Term(TMT6plex); [Y]8(Phospho)
	PKP3	1.82295	2.07689	2.19352	2.65193	2.67054	-0.603771	-2.736	1.99829	-0.376389	-0.0451637	1.58383	2.45849	0.11902	2.54417	0.951571	3.5979	1.27114	0.36518	-0.405342	3.02575	1.25823	4	Plakophilin-3 OS=Homo sapiens OX=9606 GN=PKP3 PE=1 SV=1	N-Term(TMT6plex); [Y]3(Phospho)
	DDR1	-0.347583	-0.327179	1.33337	1.17944	2.33204	1.74297	3.37932	1.79835	3.78692	3.41053	0.332431	2.74073	0.889647	1.01682	0.403655	1.42092	0.559408	-0.615441	0.0174698	0.0598297	1.25568	4	Epithelial discoidin domain-containing receptor 1 OS=Homo sapiens OX=9606 GN=DDR1 PE=1 SV=1	N-Term(TMT6plex); [Y]7(Phospho)
	PTK2	2.04515	0.331506	1.45704	2.95404	2.18075						0.851547	1.47174	-0.529644	1.55499	0.191651						1.25088	2	Focal adhesion kinase 1 OS=Homo sapiens OX=9606 GN=PTK2 PE=1 SV=2	N-Term(TMT6plex); [Y]1(Phospho); K9(TMT6plex)
	TC2N						1.65927	0.794096	2.5741	0.795142	1.67335						2.82102	1.04266	0.207147	0.410059	0.517868	1.24947	2	Tandem C2 domains nuclear protein OS=Homo sapiens OX=9606 GN=TC2N PE=1 SV=2	N-Term(TMT6plex); [Y]2(Phospho); C6(Carbamidomethyl)
	SLC38A2																2.11795	0.661435	0.222251	1.37476	1.86911	1.2491	1	Sodium-coupled neutral amino acid transporter 2 OS=Homo sapiens OX=9606 GN=SLC38A2 PE=1 SV=2	N-Term(TMT6plex); [Y]3(Phospho); K21(TMT6plex)
	KLC2																2.11824	1.38636	0.0863363	1.44223	1.20332	1.2473	1	Kinesin light chain 2 OS=Homo sapiens OX=9606 GN=KLC2 PE=1 SV=1	N-Term(TMT6plex); [Y]6(Phospho)
	DSG2	1.58885	0.763193	0.876975	1.96752	1.68047	0.607416	1.26114	1.72221	3.29338	1.67527	0.316994	0.124176	-0.0344967	1.92499	0.928857						1.24646	3	Desmoglein-2 OS=Homo sapiens OX=9606 GN=DSG2 PE=1 SV=2	N-Term(TMT6plex); [Y]2(Phospho)
	NAXE	0.838974	1.23681	1.65647	1.37777	1.06734																1.23547	1	NAD(P)H-hydrate epimerase OS=Homo sapiens OX=9606 GN=NAXE PE=1 SV=2	N-Term(TMT6plex); [Y]1(Phospho)
	CTNND1	1.73636	0.928562	2.42769	1.84077	2.14939											0.702705	1.12198	-1.34268	2.05255	0.636382	1.22537	2	Catenin delta-1 OS=Homo sapiens OX=9606 GN=CTNND1 PE=1 SV=1	N-Term(TMT6plex); [Y]6(Phospho)
	BAIAP2L1						0.297963	0.857411	1.03582	1.76215	2.16431											1.22353	1	Brain-specific angiogenesis inhibitor 1-associated protein 2-like protein 1 OS=Homo sapiens OX=9606 GN=BAIAP2L1 PE=1 SV=2	N-Term(TMT6plex); [Y]5(Phospho); K12(TMT6plex)
	PLEKHA6	2.39595	0.535122	1.94914	2.3587	2.75844	1.30775	1.37814	1.383	0.951454	0.81099	1.63278	0.582448	-0.381546	2.40856	1.03102	1.64907	-0.394778	-1.55874	0.971618	2.60037	1.21847	4	Pleckstrin homology domain-containing family A member 6 OS=Homo sapiens OX=9606 GN=PLEKHA6 PE=1 SV=4	N-Term(TMT6plex); [Y]5(Phospho)
	PDGFRB	1.31055	1.42882	1.0179	0.987069	1.31014																1.2109	1	Platelet-derived growth factor receptor beta OS=Homo sapiens OX=9606 GN=PDGFRB PE=1 SV=1	N-Term(TMT6plex); [Y]9(Phospho)
	BLK						1.99455	1.27507	2.21944	3.11849	3.37464	1.54325	0.470492	1.45515	0.571055	0.6739	1.15955	-0.06188	1.29569	-0.237975	-0.747522	1.20693	3	Tyrosine-protein kinase Blk OS=Homo sapiens OX=9606 GN=BLK PE=1 SV=3	N-Term(TMT6plex); [Y]2(Phospho)
	TMC5	2.79405	2.29987	2.33848	2.20909	2.44797	-0.0369318	-1.81837	1.04475	-0.11492	0.86329											1.20273	2	Transmembrane channel-like protein 5 OS=Homo sapiens OX=9606 GN=TMC5 PE=2 SV=3	N-Term(TMT6plex); [Y]14(Phospho)
	TNK2	1.81365	1.01439	1.44911	2.27657	1.96374						0.682798	0.97562	0.332991	0.771374	0.680345						1.19606	2	Activated CDC42 kinase 1 OS=Homo sapiens OX=9606 GN=TNK2 PE=1 SV=3	N-Term(TMT6plex); [Y]9(Phospho)
	TYROBP	2.29881	2.91723	2.35125	3.31424	3.04104	0.135139	0.521598	1.26008	0.904244	0.393053	0.81939	1.36651	1.41719	1.01998	0.157483	0.644552	-0.0461946	0.352269	0.649673	0.385847	1.19517	4	TYRO protein tyrosine kinase-binding protein OS=Homo sapiens OX=9606 GN=TYROBP PE=1 SV=1	N-Term(TMT6plex); [Y]8(Phospho)
	TSPAN6	2.92879	1.06648	1.94873	2.03541	3.78192	0.813662	0.365985	0.731942	1.59789	0.484332	-0.539972	1.09274	2.19051	1.31427	0.028103	0.683248	1.50079	0.270595	0.21703	1.33535	1.19239	4	Tetraspanin-6 OS=Homo sapiens OX=9606 GN=TSPAN6 PE=1 SV=1	N-Term(TMT6plex); [Y]7(Phospho)
	ARHGAP12																0.522517	1.00959	-0.450111	0.972539	3.89491	1.18989	1	Rho GTPase-activating protein 12 OS=Homo sapiens OX=9606 GN=ARHGAP12 PE=1 SV=1	N-Term(TMT6plex); T3(Phospho); S12(Phospho); [Y]15(Phospho); K22(TMT6plex)
	MUC1	1.72712	1.77364	2.04781	2.29364	1.51339											-0.455718	1.92776	-1.69056	1.11875	1.6058	1.18616	2	Mucin-1 OS=Homo sapiens OX=9606 GN=MUC1 PE=1 SV=3	N-Term(TMT6plex); [Y]12(Phospho)
	PARD3	1.67361	0.82947	2.35229	1.39638	1.38796	1.72712	1.77364	2.04781	2.29364	1.51339						-0.314832	0.479465	-1.7285	0.590743	1.75644	1.18524	3	Partitioning defective 3 homolog OS=Homo sapiens OX=9606 GN=PARD3 PE=1 SV=2	N-Term(TMT6plex); [Y]4(Phospho)
	DYRK2	1.94984	1.47596	2.00134	2.49953	2.26167	0.0490989	0.253924	1.19162	0.0145077	0.640944	1.72294	1.37222	0.712771	1.46631	1.03768	1.25941	1.34526	-0.19667	1.2648	1.36174	1.18424	4	Dual specificity tyrosine-phosphorylation-regulated kinase 2 OS=Homo sapiens OX=9606 GN=DYRK2 PE=1 SV=3; Dual specificity tyrosine-phosphorylation-regulated kinase 4 OS=Homo sapiens OX=9606 GN=DYRK4 PE=1 SV=2	N-Term(TMT6plex); [Y]4(Phospho)
	VASP	1.04805	0.362077	0.727398	1.94357	0.911616	1.03178	2.10316	1.19417	2.80522	1.20615	0.759994	1.32476	0.194082	1.39222	0.752735						1.1838	3	Vasodilator-stimulated phosphoprotein OS=Homo sapiens OX=9606 GN=VASP PE=1 SV=3	N-Term(TMT6plex); [Y]4(Phospho)
	LCK	2.52196	1.51869	2.41038	2.86826	2.70542	-1.81763	-2.40877	-0.121666	-1.52569	-0.22565	2.71359	1.09268	1.71033	1.53013	1.65631	2.9949	1.67075	0.951278	1.18483	2.14334	1.17867	4	Tyrosine-protein kinase Lck OS=Homo sapiens OX=9606 GN=LCK PE=1 SV=6; Tyrosine-protein kinase Yes OS=Homo sapiens OX=9606 GN=YES1 PE=1 SV=3; Tyrosine-protein kinase Fyn OS=Homo sapiens OX=9606 GN=FYN PE=1 SV=3; Proto-oncogene tyrosine-protein kinase Src OS=Homo sapiens OX=9606 GN=SRC PE=1 SV=3	N-Term(TMT6plex); [Y]7(Phospho)
	TMEM106B	1.62536	1.58359	1.5582	1.47884	1.95785	3.02289	-0.730732	1.59586	0.295587	1.0843						0.735036	0.993299	-0.226116	1.36254	1.33867	1.17835	3	Transmembrane protein 106B OS=Homo sapiens OX=9606 GN=TMEM106B PE=1 SV=2	N-Term(TMT6plex); [Y]9(Phospho)
	EPHA2	1.55826	0.425043	2.12971	2.61809	2.72272											2.10168	0.268417	-0.632068	0.00450488	0.516859	1.17132	2	Ephrin type-A receptor 2 OS=Homo sapiens OX=9606 GN=EPHA2 PE=1 SV=2	N-Term(TMT6plex); [Y]2(Phospho); K17(TMT6plex)
	ARHGAP12																0.709764	0.669174	0.631707	1.07671	2.76493	1.17046	1	Rho GTPase-activating protein 12 OS=Homo sapiens OX=9606 GN=ARHGAP12 PE=1 SV=1	N-Term(TMT6plex); S12(Phospho); [Y]15(Phospho); K22(TMT6plex)
	PRPF4B	2.27813	-0.202624	2.15369	1.89212	2.35607	1.73636	0.928562	2.42769	1.84077	2.14939	0.235125	0.97057	0.482154	1.70454	1.15621	1.02149	0.0615677	-0.890325	1.16595	-0.112987	1.16772	4	Serine/threonine-protein kinase PRP4 homolog OS=Homo sapiens OX=9606 GN=PRPF4B PE=1 SV=3	N-Term(TMT6plex); C2(Carbamidomethyl); [Y]18(Phospho)
	CKMT1A	1.46831	2.79329	1.38737	2.16443	1.40659	0.355118	-0.143265	1.2755	0.497832	0.461324											1.16665	2	Creatine kinase U-type, mitochondrial OS=Homo sapiens OX=9606 GN=CKMT1A PE=1 SV=1	N-Term(TMT6plex); [Y]3(Phospho)
	ELMO2	1.10832	-0.174268	0.960922	1.74915	2.18497																1.16582	1	Engulfment and cell motility protein 2 OS=Homo sapiens OX=9606 GN=ELMO2 PE=1 SV=2	N-Term(TMT6plex); C3(Carbamidomethyl); [Y]14(Phospho)
	EPHA2																1.78589	0.662804	-0.0202388	2.32035	1.07701	1.16516	1	Ephrin type-A receptor 2 OS=Homo sapiens OX=9606 GN=EPHA2 PE=1 SV=2	N-Term(TMT6plex); [Y]2(Phospho); [Y]8(Phospho); K17(TMT6plex)
	WARS	1.20867	0.177327	0.559602	3.11373	0.756017																1.16307	1	Tryptophan--tRNA ligase, cytoplasmic OS=Homo sapiens OX=9606 GN=WARS PE=1 SV=2	N-Term(TMT6plex); C7(Carbamidomethyl); C11(Carbamidomethyl); [Y]18(Phospho)
	EIF1	0.858587	0.16545	1.29181	2.09678	1.40006																1.16254	1	Eukaryotic translation initiation factor 1 OS=Homo sapiens OX=9606 GN=EIF1 PE=1 SV=1; Eukaryotic translation initiation factor 1b OS=Homo sapiens OX=9606 GN=EIF1B PE=1 SV=2	N-Term(TMT6plex); [Y]12(Phospho)
	HIPK3						1.79045	2.00557	0.0680334	5.21649	1.39261	0.484375	0.81465	0.975701	1.37843	0.588875	0.970579	0.588625	-0.0965591	0.580929	0.610857	1.15798	3	Homeodomain-interacting protein kinase 3 OS=Homo sapiens OX=9606 GN=HIPK3 PE=1 SV=1	N-Term(TMT6plex); C3(Carbamidomethyl); [Y]6(Phospho)
	DNAJC5	0.297963	0.857411	1.03582	1.76215	2.16431						0.664003	0.999955	0.437365	2.45221	0.895297						1.15665	2	DnaJ homolog subfamily C member 5 OS=Homo sapiens OX=9606 GN=DNAJC5 PE=1 SV=1	N-Term(TMT6plex); [Y]10(Phospho)
	PKP2						1.82295	2.07689	2.19352	2.65193	2.67054						-0.617231	1.44988	-2.03869	-0.128258	1.48296	1.15645	2	Plakophilin-2 OS=Homo sapiens OX=9606 GN=PKP2 PE=1 SV=2	N-Term(TMT6plex); [Y]3(Phospho)
	PARD3B																1.34671	2.07168	-0.334541	0.999295	1.60549	1.13773	1	Partitioning defective 3 homolog B OS=Homo sapiens OX=9606 GN=PARD3B PE=1 SV=2	N-Term(TMT6plex); [Y]7(Phospho); K9(TMT6plex)
	MYH9	1.82945	0.176016	0.910468	1.77946	2.35774	-0.33412	0.418444	0.169008	0.688371	1.11563	1.76691	2.05406	1.38458	0.609552	1.34076	1.52848	0.520727	2.32264	1.38883	0.720958	1.1374	4	Myosin-9 OS=Homo sapiens OX=9606 GN=MYH9 PE=1 SV=4	N-Term(TMT6plex); [Y]9(Phospho)
	MEMO1	1.12888	1.60582	1.33025	2.4325	1.44261											1.63024	0.761053	0.151419	0.352293	0.530926	1.1366	2	Protein MEMO1 OS=Homo sapiens OX=9606 GN=MEMO1 PE=1 SV=1	N-Term(TMT6plex); [Y]12(Phospho)
	PKP2	1.93269	2.52983	2.08419	1.44984	2.51212	-0.689128	-1.18174	0.244	2.10692	0.370005											1.13587	2	Plakophilin-2 OS=Homo sapiens OX=9606 GN=PKP2 PE=1 SV=2	N-Term(TMT6plex); [Y]6(Phospho)
	ARHGAP12																0.409693	0.790296	-0.493133	0.913141	4.00669	1.12534	1	Rho GTPase-activating protein 12 OS=Homo sapiens OX=9606 GN=ARHGAP12 PE=1 SV=1	N-Term(TMT6plex); T2(Phospho); S12(Phospho); [Y]15(Phospho); K22(TMT6plex)
	PRKCD	1.32761	0.639202	1.98585	2.14909	2.31669											-0.4469	-0.0191432	-0.195364	0.910058	2.40206	1.10692	2	Protein kinase C delta type OS=Homo sapiens OX=9606 GN=PRKCD PE=1 SV=2	N-Term(TMT6plex); S3(Phospho); [Y]12(Phospho); K17(TMT6plex)
	AFDN	0.879786	2.04225	1.70908	1.94744	1.97781	1.7818	0.78627	2.19686	2.46842	2.16739	1.60496	0.811026	-0.187623	1.59945	0.217235	-0.938519	1.18159	-1.8808	0.617569	0.929009	1.09555	4	Afadin OS=Homo sapiens OX=9606 GN=AFDN PE=1 SV=3	N-Term(TMT6plex); [Y]4(Phospho)
	LYN	0.77472	1.07334	2.40957	2.24153	2.73826						0.953919	1.0059	-0.143322	0.441126	0.23859	2.07661	0.761383	0.380725	0.46883	1.00614	1.09516	3	Tyrosine-protein kinase Lyn OS=Homo sapiens OX=9606 GN=LYN PE=1 SV=3	N-Term(TMT6plex); [Y]8(Phospho)
	BCAR1	1.05395	0.486381	1.66235	1.30799	2.18544											1.17993	-0.158896	0.94268	1.0273	1.23606	1.09232	2	Breast cancer anti-estrogen resistance protein 1 OS=Homo sapiens OX=9606 GN=BCAR1 PE=1 SV=2	N-Term(TMT6plex); [Y]13(Phospho); K21(TMT6plex)
	PRAG1	0.390256	-0.607606	0.702528	0.616779	0.0275138	2.07254	1.92306	2.16482	1.92698	1.7218	3.25862	0.739083	0.148544	0.285234	1.01399						1.09228	3	Inactive tyrosine-protein kinase PRAG1 OS=Homo sapiens OX=9606 GN=PRAG1 PE=1 SV=4	N-Term(TMT6plex); [Y]9(Phospho); K14(TMT6plex)
	GRB2											0.87583	1.31349	0.298968	2.54309	0.399021						1.08608	1	Growth factor receptor-bound protein 2 OS=Homo sapiens OX=9606 GN=GRB2 PE=1 SV=1	N-Term(TMT6plex); [Y]11(Phospho)
	ERBB2	0.634866	0.916095	1.81352	1.12451	1.16072	1.42492	0.3264	1.89289	2.72182	2.45448	0.957243	-0.348865	0.739006	0.537641	-0.117822						1.08249	3	Receptor tyrosine-protein kinase erbB-2 OS=Homo sapiens OX=9606 GN=ERBB2 PE=1 SV=1	N-Term(TMT6plex); [Y]10(Phospho)
	RPL10A																1.67216	1.02669	-1.02508	0.677564	3.03868	1.07801	1	60S ribosomal protein L10a OS=Homo sapiens OX=9606 GN=RPL10A PE=1 SV=2	N-Term(TMT6plex); [Y]4(Phospho)
	ANXA11	0.729707	0.560019	0.494024	2.51443	1.04484																1.0686	1	Annexin A11 OS=Homo sapiens OX=9606 GN=ANXA11 PE=1 SV=1	N-Term(TMT6plex); [Y]3(Phospho); K16(TMT6plex)
	GPRC5A	2.49275	-0.00890583	0.960529	0.689902	1.19011																1.06488	1	Retinoic acid-induced protein 3 OS=Homo sapiens OX=9606 GN=GPRC5A PE=1 SV=2	N-Term(TMT6plex); [Y]2(Phospho); T14(Phospho); K35(TMT6plex)
	GPA33						0.712348	-0.710405	1.44458	1.13901	0.943521						-0.835696	3.06782	-0.723676	2.20067	3.36134	1.05995	2	Cell surface A33 antigen OS=Homo sapiens OX=9606 GN=GPA33 PE=1 SV=1	N-Term(TMT6plex); [Y]3(Phospho)
	AFAP1L2	0.978759	0.720197	0.597437	1.03776	1.11455	2.52196	1.51869	2.41038	2.86826	2.70542	0.280521	0.820397	0.667338	1.23236	0.117587	-0.260674	-0.436928	0.539447	0.247748	1.45299	1.05671	4	Actin filament-associated protein 1-like 2 OS=Homo sapiens OX=9606 GN=AFAP1L2 PE=1 SV=1	N-Term(TMT6plex); C11(Carbamidomethyl); [Y]23(Phospho)
	CDHR5	3.02289	-0.730732	1.59586	0.295587	1.0843																1.05358	1	Cadherin-related family member 5 OS=Homo sapiens OX=9606 GN=CDHR5 PE=1 SV=3	N-Term(TMT6plex); [Y]14(Phospho)
	PXN						2.25191	2.11515	2.11505	2.54181	4.21382	-0.92244	-0.477164	-0.461044	-1.09165	0.247188						1.05326	2	Paxillin OS=Homo sapiens OX=9606 GN=PXN PE=1 SV=3	N-Term(TMT6plex); [Y]13(Phospho); K18(TMT6plex)
	NFAM1	1.03815	0.859555	1.47558	0.958443	0.928501																1.05205	1	NFAT activation molecule 1 OS=Homo sapiens OX=9606 GN=NFAM1 PE=1 SV=1	N-Term(TMT6plex); [Y]11(Phospho)
	DYRK1B	1.29769	1.18627	1.62952	1.50018	1.1039	1.05759	0.954845	1.98081	1.54448	1.17122	0.784641	1.14461	0.995899	1.48137	0.649875	0.605969	0.943848	-0.661251	0.842908	0.803529	1.0509	4	Dual specificity tyrosine-phosphorylation-regulated kinase 1B OS=Homo sapiens OX=9606 GN=DYRK1B PE=1 SV=1; Dual specificity tyrosine-phosphorylation-regulated kinase 1A OS=Homo sapiens OX=9606 GN=DYRK1A PE=1 SV=2	N-Term(TMT6plex); [Y]4(Phospho)
	EPHB1																-0.63741	1.75148	0.24595	0.77119	3.08664	1.04357	1	Ephrin type-B receptor 1 OS=Homo sapiens OX=9606 GN=EPHB1 PE=1 SV=1; Ephrin type-B receptor 2 OS=Homo sapiens OX=9606 GN=EPHB2 PE=1 SV=5	N-Term(TMT6plex); [Y]2(Phospho); T7(Phospho)
	CLTC	2.28305	1.01338	1.83134	1.68932	2.38893						2.11363	2.06611	-0.60671	1.51532	0.89772	-0.185728	0.25566	-1.05142	0.732343	0.657344	1.04002	3	Clathrin heavy chain 1 OS=Homo sapiens OX=9606 GN=CLTC PE=1 SV=5	N-Term(TMT6plex); [Y]16(Phospho)
	EGFR	1.40588	0.33592	1.78204	1.65463	1.36562	0.823331	0.951389	-1.49423	2.87125	1.13805						-0.962766	0.905055	1.18015	1.96729	1.64993	1.03824	3	Epidermal growth factor receptor OS=Homo sapiens OX=9606 GN=EGFR PE=1 SV=2	N-Term(TMT6plex); [Y]12(Phospho); K19(TMT6plex)
	LPP	0.0934688	0.597263	1.25128	0.548841	0.806988	0.571722	1.05494	1.18783	2.44923	1.80253											1.03641	2	Lipoma-preferred partner OS=Homo sapiens OX=9606 GN=LPP PE=1 SV=1	N-Term(TMT6plex); [Y]12(Phospho)
	PAG1						0.373139	-0.615397	0.832829	1.54172	0.952379	2.61422	1.19736	0.745391	0.773256	1.91342						1.03283	2	Phosphoprotein associated with glycosphingolipid-enriched microdomains 1 OS=Homo sapiens OX=9606 GN=PAG1 PE=1 SV=2	N-Term(TMT6plex); [Y]6(Phospho)
	APRT	0.595366	0.870691	0.639076	2.57668	0.471979																1.03076	1	Adenine phosphoribosyltransferase OS=Homo sapiens OX=9606 GN=APRT PE=1 SV=2	N-Term(TMT6plex); [Y]3(Phospho)
	PAG1	0.846342	0.30135	0.675346	1.94602	1.40174	0.639837	0.854084	1.68593	2.02449	0.894357	1.6365	1.21651	0.77584	0.0516159	0.384658						1.02231	3	Phosphoprotein associated with glycosphingolipid-enriched microdomains 1 OS=Homo sapiens OX=9606 GN=PAG1 PE=1 SV=2	N-Term(TMT6plex); [Y]12(Phospho)
	CNP	0.880277	0.647309	1.48835	1.08978	0.982199																1.01758	1	2,3-cyclic-nucleotide 3-phosphodiesterase OS=Homo sapiens OX=9606 GN=CNP PE=1 SV=2	N-Term(TMT6plex); [Y]9(Phospho); C10(Carbamidomethyl)
	KRT8						1.35412	1.2546	1.64124	2.30951	0.733015	2.19384	1.1585	-1.588	0.981114	0.457294	1.59819	0.194104	0.297322	1.61721	0.866148	1.00455	3	Keratin, type II cytoskeletal 8 OS=Homo sapiens OX=9606 GN=KRT8 PE=1 SV=7	N-Term(TMT6plex); [Y]6(Phospho); K9(TMT6plex)
	BCAR1	1.49839	1.99458	2.32323	1.28717	2.3973	0.0198489	0.565087	0.941121	0.59924	0.884325	0.00123844	0.212813	0.584099	0.743185	0.822051	0.213512	0.527184	0.0343015	2.75064	1.64928	1.00243	4	Breast cancer anti-estrogen resistance protein 1 OS=Homo sapiens OX=9606 GN=BCAR1 PE=1 SV=2	N-Term(TMT6plex); [Y]17(Phospho)
	NPY	0.914861	1.09551	0.901227	1.32882	0.758397																0.999763	1	Pro-neuropeptide Y OS=Homo sapiens OX=9606 GN=NPY PE=1 SV=1	N-Term(TMT6plex); [Y]2(Phospho)
	SIRPA	1.04103	0.422291	0.512679	1.63822	1.36833																0.99651	1	Tyrosine-protein phosphatase non-receptor type substrate 1 OS=Homo sapiens OX=9606 GN=SIRPA PE=1 SV=2	N-Term(TMT6plex); [Y]11(Phospho); K18(TMT6plex)
	TJP1	1.56463	1.23309	0.883705	2.78281	1.5906	1.027	1.8663	2.3371	1.20039	1.93408						-0.864409	0.507185	-1.78026	0.249996	0.317342	0.989971	3	Tight junction protein ZO-1 OS=Homo sapiens OX=9606 GN=TJP1 PE=1 SV=3	N-Term(TMT6plex); [Y]4(Phospho)
	EGFR	0.915163	-0.208497	1.94106	1.34716	1.67812	1.16436	0.958628	1.37494	5.03515	2.59661	0.661689	-0.308835	-0.431875	0.776089	-0.21272	-0.245089	0.273877	0.87109	0.880644	0.725348	0.989645	4	Epidermal growth factor receptor OS=Homo sapiens OX=9606 GN=EGFR PE=1 SV=2	N-Term(TMT6plex); [Y]9(Phospho)
	LCP1	1.62388	0.598451	-0.711463	1.3544	0.00379391	1.4589	1.88594	1.44136	1.71262	2.67784						1.13458	0.249698	0.993077	-0.0743401	0.383344	0.982139	3	Plastin-2 OS=Homo sapiens OX=9606 GN=LCP1 PE=1 SV=6	N-Term(TMT6plex); [Y]2(Phospho); K14(TMT6plex)
	PTPN6	1.99455	1.27507	2.21944	3.11849	3.37464						1.7473	-0.300173	0.994236	0.577353	1.60332	-0.134117	-0.892026	0.0195518	-0.531193	-0.415372	0.976738	3	Tyrosine-protein phosphatase non-receptor type 6 OS=Homo sapiens OX=9606 GN=PTPN6 PE=1 SV=1	N-Term(TMT6plex); [Y]6(Phospho); K16(TMT6plex)
	CXADR	2.30012	0.960784	2.59339	1.59973	3.24997	-0.941738	-0.220575	0.506367	-0.888915	0.513139						0.364979	1.62443	-0.470831	1.26981	2.16393	0.974973	3	Coxsackievirus and adenovirus receptor OS=Homo sapiens OX=9606 GN=CXADR PE=1 SV=1	N-Term(TMT6plex); [Y]3(Phospho)
	PRKCD											1.42295	0.529446	-0.912284	2.77576	1.04055						0.971284	1	Protein kinase C delta type OS=Homo sapiens OX=9606 GN=PRKCD PE=1 SV=2	N-Term(TMT6plex); S7(Phospho); [Y]13(Phospho); K18(TMT6plex)
	PTK2B	1.42741	-0.0878101	0.799715	1.59399	2.34631						1.62797	0.27479	0.165135	0.0122439	1.52255						0.96823	2	Protein-tyrosine kinase 2-beta OS=Homo sapiens OX=9606 GN=PTK2B PE=1 SV=2	N-Term(TMT6plex); [Y]8(Phospho); K9(TMT6plex)
	TNS3	0.935798	1.33217	1.32681	1.90784	1.83309											1.12519	0.952424	-1.1492	0.330196	1.06283	0.965715	2	Tensin-3 OS=Homo sapiens OX=9606 GN=TNS3 PE=1 SV=2	N-Term(TMT6plex); S3(Phospho); [Y]25(Phospho); K27(TMT6plex)
	DLG3	1.33537	0.907403	1.99069	1.44821	1.49593	1.40588	0.33592	1.78204	1.65463	1.36562	1.01568	0.148863	0.0911471	1.60131	0.839203	-0.61772	0.976735	-0.280315	0.152966	1.60604	0.962779	4	Disks large homolog 3 OS=Homo sapiens OX=9606 GN=DLG3 PE=1 SV=2	N-Term(TMT6plex); [Y]10(Phospho)
	ADD3	1.77108	1.06125	2.58665	1.81827	1.79964											0.20069	1.07024	-2.13018	0.239461	1.18874	0.960584	2	Gamma-adducin OS=Homo sapiens OX=9606 GN=ADD3 PE=1 SV=1	N-Term(TMT6plex); [Y]8(Phospho)
	IGF1R	1.12682	-0.0952668	1.82969	1.39437	1.20534	0.953584	0.39547	1.54708	1.60866	2.6578						0.383619	0.243907	0.242674	-0.452197	1.26629	0.953856	3	Insulin-like growth factor 1 receptor OS=Homo sapiens OX=9606 GN=IGF1R PE=1 SV=1; Insulin receptor OS=Homo sapiens OX=9606 GN=INSR PE=1 SV=4	N-Term(TMT6plex); [Y]7(Phospho)
	RAB8A	0.573093	0.571609	1.32563	1.30356	1.31798	2.10802	1.40363	2.62064	2.22704	2.67241						-0.735621	-0.719309	1.05404	-1.56978	0.129205	0.952144	3	Ras-related protein Rab-8A OS=Homo sapiens OX=9606 GN=RAB8A PE=1 SV=1; Ras-related protein Rab-8B OS=Homo sapiens OX=9606 GN=RAB8B PE=1 SV=2	N-Term(TMT6plex); [Y]2(Phospho); K7(TMT6plex)
	DSC2																1.64803	0.142835	0.166032	1.34689	1.42954	0.946666	1	Desmocollin-2 OS=Homo sapiens OX=9606 GN=DSC2 PE=1 SV=1	N-Term(TMT6plex); [Y]5(Phospho)
	ITGB1	0.658778	0.186457	0.81484	1.17237	1.86579																0.939646	1	Integrin beta-1 OS=Homo sapiens OX=9606 GN=ITGB1 PE=1 SV=2	N-Term(TMT6plex); [Y]9(Phospho); K10(TMT6plex)
	PTPN11	1.65021	-1.4435	2.18621	0.955545	1.33893																0.937478	1	Tyrosine-protein phosphatase non-receptor type 11 OS=Homo sapiens OX=9606 GN=PTPN11 PE=1 SV=2	N-Term(TMT6plex); [Y]4(Phospho); K8(TMT6plex)
	KIAA1217	1.25669	1.40887	1.45442	1.60936	1.83291											0.162883	0.949185	-0.696285	0.4359	0.947273	0.93612	2	Sickle tail protein homolog OS=Homo sapiens OX=9606 GN=KIAA1217 PE=1 SV=2	N-Term(TMT6plex); [Y]9(Phospho)
	NOS2						-0.894091	0.233575	-0.336707	2.18191	0.734745						1.20597	2.83848	-0.603166	2.54225	1.4112	0.931416	2	Nitric oxide synthase, inducible OS=Homo sapiens OX=9606 GN=NOS2 PE=1 SV=2	N-Term(TMT6plex); [Y]2(Phospho)
	ATP1A1	1.65346	1.27478	1.73222	2.01692	1.21793											-0.105923	0.49297	-0.879102	0.538347	1.32832	0.926993	2	Sodium/potassium-transporting ATPase subunit alpha-1 OS=Homo sapiens OX=9606 GN=ATP1A1 PE=1 SV=1	N-Term(TMT6plex); [Y]1(Phospho)
	ACTB	0.629073	0.35997	0.654386	1.06232	0.400893	3.57931	1.1985	3.1349	2.13285	2.90989						-0.43023	-0.778265	-0.617887	-0.0614126	-0.316748	0.923837	3	Actin, cytoplasmic 1 OS=Homo sapiens OX=9606 GN=ACTB PE=1 SV=1; Actin, cytoplasmic 2 OS=Homo sapiens OX=9606 GN=ACTG1 PE=1 SV=1	N-Term(TMT6plex); [Y]3(Phospho)
	AFAP1L2						2.22799	1.27883	1.67927	0.678948	1.61898						0.226503	1.06504	-0.864687	0.355288	0.964668	0.923082	2	Actin filament-associated protein 1-like 2 OS=Homo sapiens OX=9606 GN=AFAP1L2 PE=1 SV=1	N-Term(TMT6plex); [Y]7(Phospho)
	TJP1						1.49309	0.33228	0.166811	0.909975	1.69829											0.92009	1	Tight junction protein ZO-1 OS=Homo sapiens OX=9606 GN=TJP1 PE=1 SV=3	N-Term(TMT6plex); [Y]6(Phospho)
	LIME1	0.923359	0.90492	1.36276	2.17689	1.9905	-0.163074	-0.451994	0.270802	0.963242	0.733753						1.46572	2.0076	1.49895	-0.429431	0.513272	0.917818	3	Lck-interacting transmembrane adapter 1 OS=Homo sapiens OX=9606 GN=LIME1 PE=1 SV=1	N-Term(TMT6plex); [Y]13(Phospho)
	PSMA2	1.4902	0.703768	0.66567	2.68072	1.15411	1.40192	1.27896	1.71489	1.10073	1.0428	-0.278947	0.584353	0.316372	1.13282	0.474644	1.34191	-0.508975	0.35584	0.47021	1.13271	0.912736	4	Proteasome subunit alpha type-2 OS=Homo sapiens OX=9606 GN=PSMA2 PE=1 SV=2	N-Term(TMT6plex); [Y]4(Phospho)
	FRK											0.442789	1.09991	0.628749	1.42021	1.29896	-0.143869	0.976552	0.814283	1.68138	0.908148	0.912712	2	Tyrosine-protein kinase FRK OS=Homo sapiens OX=9606 GN=FRK PE=1 SV=1	N-Term(TMT6plex); [Y]11(Phospho)
	ARPC3	1.85139	0.281476	0.234288	1.29446	0.895301																0.911382	1	Actin-related protein 2/3 complex subunit 3 OS=Homo sapiens OX=9606 GN=ARPC3 PE=1 SV=3	N-Term(TMT6plex); K3(TMT6plex); [Y]13(Phospho); K16(TMT6plex)
	TYK2	1.24902	1.55001	1.41787	2.55601	1.62424	-0.814778	-0.370609	0.90466	-0.166918	0.569453	1.31915	0.758466	1.83307	1.01801	1.39498	-0.184182	0.494817	1.47901	0.080821	1.51118	0.911213	4	Non-receptor tyrosine-protein kinase TYK2 OS=Homo sapiens OX=9606 GN=TYK2 PE=1 SV=3	N-Term(TMT6plex); C10(Carbamidomethyl); [Y]11(Phospho)
	PKP2																2.56779	0.205632	1.29502	-0.787798	1.22454	0.901036	1	Plakophilin-2 OS=Homo sapiens OX=9606 GN=PKP2 PE=1 SV=2	N-Term(TMT6plex); [Y]2(Phospho); K6(TMT6plex)
	CNN1	0.266441	0.911697	2.2852	0.54343	0.428381																0.887029	1	Calponin-1 OS=Homo sapiens OX=9606 GN=CNN1 PE=1 SV=2	N-Term(TMT6plex); [Y]10(Phospho)
	AXL	0.991236	0.342068	1.24332	1.05299	2.7364	1.4768	1.96131	1.64203	2.46291	3.9834	0.288887	1.03126	0.322931	0.939973	0.534552	-0.704896	-0.564327	-1.48155	-0.646064	0.0886173	0.885093	4	Tyrosine-protein kinase receptor UFO OS=Homo sapiens OX=9606 GN=AXL PE=1 SV=4	N-Term(TMT6plex); [Y]1(Phospho); C4(Carbamidomethyl)
	LILRB2	1.40283	0.755351	0.749872	1.63368	2.29909											1.07815	-0.0295912	0.246397	0.0709375	0.617787	0.88245	2	Leukocyte immunoglobulin-like receptor subfamily B member 2 OS=Homo sapiens OX=9606 GN=LILRB2 PE=1 SV=4; Leukocyte immunoglobulin-like receptor subfamily B member 1 OS=Homo sapiens OX=9606 GN=LILRB1 PE=1 SV=1	N-Term(TMT6plex); [Y]13(Phospho); K17(TMT6plex)
	TAGLN2	1.45166	-0.154847	0.652371	1.04481	1.4085																0.880498	1	Transgelin-2 OS=Homo sapiens OX=9606 GN=TAGLN2 PE=1 SV=3	N-Term(TMT6plex); [Y]4(Phospho)
	PHPT1	0.336918	0.838181	0.751783	1.96643	0.508051																0.880273	1	14 kDa phosphohistidine phosphatase OS=Homo sapiens OX=9606 GN=PHPT1 PE=1 SV=1	N-Term(TMT6plex); K2(TMT6plex); [Y]6(Phospho)
	LMCD1																0.205788	1.49531	0.461323	0.895066	1.34171	0.87984	1	LIM and cysteine-rich domains protein 1 OS=Homo sapiens OX=9606 GN=LMCD1 PE=1 SV=1	N-Term(TMT6plex); C1(Carbamidomethyl); C4(Carbamidomethyl); [Y]13(Phospho)
	FLNA	1.37322	1.84094	1.91505	1.34428	1.15246											-0.26275	1.69655	-2.58822	0.368816	1.84793	0.868829	2	Filamin-A OS=Homo sapiens OX=9606 GN=FLNA PE=1 SV=4	N-Term(TMT6plex); [Y]14(Phospho); C15(Carbamidomethyl)
	CLTC	3.20889	2.61436	2.98189	2.97243	3.42997	-1.90111	-3.58016	-1.60722	-2.06348	-1.56864						0.211482	2.48183	0.0854797	3.62139	2.14219	0.86862	3	Clathrin heavy chain 1 OS=Homo sapiens OX=9606 GN=CLTC PE=1 SV=5; Clathrin heavy chain 2 OS=Homo sapiens OX=9606 GN=CLTCL1 PE=1 SV=2	N-Term(TMT6plex); [Y]2(Phospho)
	SDC4											0.186384	1.29732	0.99338	1.5633	0.285812						0.865239	1	Syndecan-4 OS=Homo sapiens OX=9606 GN=SDC4 PE=1 SV=2	N-Term(TMT6plex); K1(TMT6plex); [Y]8(Phospho)
	CLTC	2.13469	0.386936	1.73017	2.71369	2.22665	-0.660694	-0.668304	0.97462	-0.246482	0.771831						-0.275919	1.75917	-1.00975	1.81366	1.28052	0.862052	3	Clathrin heavy chain 1 OS=Homo sapiens OX=9606 GN=CLTC PE=1 SV=5	N-Term(TMT6plex); [Y]6(Phospho)
	ANKRD39	0.686438	1.1812	1.18358	2.18933	0.373086											0.992719	0.890701	-0.788958	0.528236	1.34307	0.857939	2	Ankyrin repeat domain-containing protein 39 OS=Homo sapiens OX=9606 GN=ANKRD39 PE=1 SV=1	N-Term(TMT6plex); [Y]12(Phospho)
	INPP5D	1.03178	2.10316	1.19417	2.80522	1.20615	0.830321	-0.60121	-0.261944	3.12635	1.47018						0.246218	0.25631	1.57164	-1.99794	-0.23316	0.849817	3	Phosphatidylinositol 3,4,5-trisphosphate 5-phosphatase 1 OS=Homo sapiens OX=9606 GN=INPP5D PE=1 SV=2	N-Term(TMT6plex); [Y]2(Phospho); K6(TMT6plex)
	PGK1	0.823331	0.951389	-1.49423	2.87125	1.13805	0.974367	0.792343	1.12405	3.68199	1.05639	-0.779094	0.467315	0.396516	1.24196	0.0291944	1.61423	-0.4192	0.844161	0.634824	0.802549	0.837569	4	Phosphoglycerate kinase 1 OS=Homo sapiens OX=9606 GN=PGK1 PE=1 SV=3	N-Term(TMT6plex); [Y]4(Phospho); K7(TMT6plex)
	GPRC5C	3.1665	0.99788	1.64155	1.12104	1.60192	-0.996342	-0.802638	1.12404	0.567858	-0.129279											0.829253	2	G-protein coupled receptor family C group 5 member C OS=Homo sapiens OX=9606 GN=GPRC5C PE=1 SV=2	N-Term(TMT6plex); [Y]7(Phospho)
	RAB13																0.469265	0.71481	3.18249	-1.56814	1.33538	0.826762	1	Ras-related protein Rab-13 OS=Homo sapiens OX=9606 GN=RAB13 PE=1 SV=1	N-Term(TMT6plex); [Y]2(Phospho); K7(TMT6plex)
	PDGFRA	0.594596	-0.964533	0.123441	0.384869	1.49626	1.23768	1.86132	1.53307	6.35929	1.13798						-0.048535	-0.379747	-0.0726904	-0.367051	-0.567305	0.82191	3	Platelet-derived growth factor receptor alpha OS=Homo sapiens OX=9606 GN=PDGFRA PE=1 SV=1	N-Term(TMT6plex); [Y]7(Phospho)
	MAPK13	1.30775	1.37814	1.383	0.951454	0.81099	1.67361	0.82947	2.35229	1.39638	1.38796						-0.642157	1.06708	-1.74389	-0.0861435	0.258336	0.821617	3	Mitogen-activated protein kinase 13 OS=Homo sapiens OX=9606 GN=MAPK13 PE=1 SV=1	N-Term(TMT6plex); [Y]9(Phospho)
	LAMTOR1	1.26973	0.180936	0.938704	0.948819	0.764802																0.820598	1	Ragulator complex protein LAMTOR1 OS=Homo sapiens OX=9606 GN=LAMTOR1 PE=1 SV=2	N-Term(TMT6plex); [Y]9(Phospho)
	ACTR3	1.21929	1.42276	1.73475	2.0752	0.873679											0.107104	1.01527	-0.93321	-0.140852	0.805437	0.817942	2	Actin-related protein 3 OS=Homo sapiens OX=9606 GN=ACTR3 PE=1 SV=3	N-Term(TMT6plex); [Y]7(Phospho)
	VAV1	1.76682	0.666326	1.82121	2.13066	1.46814						1.33939	-0.885578	-0.388121	2.25061	2.71447	0.848617	1.21869	-1.50876	-0.102121	-1.15364	0.812447	3	Proto-oncogene vav OS=Homo sapiens OX=9606 GN=VAV1 PE=1 SV=4	N-Term(TMT6plex); [Y]16(Phospho); C17(Carbamidomethyl)
	VIM	0.558894	0.791329	0.499711	0.436452	0.182551	0.727462	1.51218	1.72049	2.22397	1.37552	1.85514	-0.660768	0.406913	-0.0748051	0.620461						0.8117	3	Vimentin OS=Homo sapiens OX=9606 GN=VIM PE=1 SV=4	N-Term(TMT6plex); [Y]3(Phospho)
	ANXA2P2	0.249344	1.41683	0.0331699	1.72457	0.494721	0.914861	1.09551	0.901227	1.32882	0.758397						0.551353	0.478106	0.469151	0.373439	1.36353	0.810203	3	Putative annexin A2-like protein OS=Homo sapiens OX=9606 GN=ANXA2P2 PE=5 SV=2; Annexin A2 OS=Homo sapiens OX=9606 GN=ANXA2 PE=1 SV=2	N-Term(TMT6plex); [Y]4(Phospho); K11(TMT6plex)
	KIRREL1	0.953584	0.39547	1.54708	1.60866	2.6578											0.409609	-0.406727	0.402478	0.990571	-0.464954	0.809357	2	Kin of IRRE-like protein 1 OS=Homo sapiens OX=9606 GN=KIRREL1 PE=1 SV=2	N-Term(TMT6plex); [Y]4(Phospho)
	HIPK2	1.76836	1.20214	2.03918	2.11282	2.54396	-2.89238	-3.68899	-0.604128	-1.22018	-1.20251	1.84528	1.85691	2.05689	2.26147	1.51963	1.11157	1.43597	1.14943	2.22839	0.621002	0.80724	4	Homeodomain-interacting protein kinase 2 OS=Homo sapiens OX=9606 GN=HIPK2 PE=1 SV=2; Homeodomain-interacting protein kinase 1 OS=Homo sapiens OX=9606 GN=HIPK1 PE=1 SV=1	N-Term(TMT6plex); C3(Carbamidomethyl); [Y]6(Phospho)
	DSP	2.25911	1.44328	1.94473	1.90734	2.44644	-0.800095	-0.0351207	1.338	-0.0629683	0.773654	1.98176	0.826381	-0.839023	-0.142592	0.200627	-0.561149	1.25775	0.331339	0.568633	1.22248	0.803029	4	Desmoplakin OS=Homo sapiens OX=9606 GN=DSP PE=1 SV=3	N-Term(TMT6plex); [Y]1(Phospho)
	FCGR2A	1.63547	1.28992	1.83521	2.46243	2.52583	-1.83866	-1.08043	0.712765	-0.977523	0.0148329	1.92336	0.342337	0.495178	1.01205	1.57434						0.795142	3	Low affinity immunoglobulin gamma Fc region receptor II-a OS=Homo sapiens OX=9606 GN=FCGR2A PE=1 SV=4	N-Term(TMT6plex); [Y]16(Phospho)
	DDR1	1.4771	1.53268	2.02549	2.29208	4.3576	-1.44668	-0.429519	-0.0775019	-0.33821	-0.0293403	1.41837	3.2959	0.5731	1.08391	0.68414	0.571469	-0.112347	-0.516317	-0.66178	0.198877	0.79495	4	Epithelial discoidin domain-containing receptor 1 OS=Homo sapiens OX=9606 GN=DDR1 PE=1 SV=1	N-Term(TMT6plex); [Y]3(Phospho)
	PKP3																1.09865	1.42983	-1.06506	0.883275	1.61136	0.791611	1	Plakophilin-3 OS=Homo sapiens OX=9606 GN=PKP3 PE=1 SV=1	N-Term(TMT6plex); [Y]3(Phospho); S7(Phospho)
	SORBS1	0.623221	-0.224931	1.58975	1.01109	0.935395																0.786905	1	Sorbin and SH3 domain-containing protein 1 OS=Homo sapiens OX=9606 GN=SORBS1 PE=1 SV=3	N-Term(TMT6plex); [Y]7(Phospho)
	TLN1						1.21929	1.42276	1.73475	2.0752	0.873679						0.364388	-1.60106	0.874429	0.860944	0.0398208	0.786419	2	Talin-1 OS=Homo sapiens OX=9606 GN=TLN1 PE=1 SV=3	N-Term(TMT6plex); [Y]4(Phospho)
	FAM83F											1.5476	1.4536	-1.15235	1.24689	0.803633						0.779874	1	Protein FAM83F OS=Homo sapiens OX=9606 GN=FAM83F PE=1 SV=1	N-Term(TMT6plex); S12(Phospho); [Y]15(Phospho)
	IGF1R	0.712348	-0.710405	1.44458	1.13901	0.943521	1.76836	1.20214	2.03918	2.11282	2.54396	1.02204	0.0910911	0.197865	0.325763	0.805708	0.0588318	0.116513	-0.51799	-0.512499	0.63323	0.770804	4	Insulin-like growth factor 1 receptor OS=Homo sapiens OX=9606 GN=IGF1R PE=1 SV=1; Insulin receptor OS=Homo sapiens OX=9606 GN=INSR PE=1 SV=4	N-Term(TMT6plex); [Y]3(Phospho)
	PSMA2	1.31585	1.75116	0.814358	1.87932	0.486886											0.143529	1.21846	0.453371	-0.842577	0.436671	0.765702	2	Proteasome subunit alpha type-2 OS=Homo sapiens OX=9606 GN=PSMA2 PE=1 SV=2	N-Term(TMT6plex); [Y]6(Phospho)
	MYL6	-0.249093	-0.0214097	1.04788	2.12465	0.920764																0.764559	1	Myosin light polypeptide 6 OS=Homo sapiens OX=9606 GN=MYL6 PE=1 SV=2	N-Term(TMT6plex); K2(TMT6plex); [Y]10(Phospho)
	PIK3R1	0.930122	2.02653	2.12946	1.8439	2.25493	0.225478	-1.50609	0.872715	0.30033	1.44001	0.0722289	0.416434	1.02228	0.568605	0.259527	-0.509855	1.00925	-0.365306	1.85951	0.403586	0.762683	4	Phosphatidylinositol 3-kinase regulatory subunit alpha OS=Homo sapiens OX=9606 GN=PIK3R1 PE=1 SV=2; Phosphatidylinositol 3-kinase regulatory subunit gamma OS=Homo sapiens OX=9606 GN=PIK3R3 PE=1 SV=2	N-Term(TMT6plex); [Y]2(Phospho)
	BCAR1	0.126351	0.695178	0.721826	2.26052	1.63876	0.915163	-0.208497	1.94106	1.34716	1.67812	0.721259	0.0123924	0.292284	-1.05794	0.325781						0.760627	3	Breast cancer anti-estrogen resistance protein 1 OS=Homo sapiens OX=9606 GN=BCAR1 PE=1 SV=2	N-Term(TMT6plex); [Y]8(Phospho)
	VPS35	0.77326	0.509986	0.696943	0.54223	1.26649																0.757781	1	Vacuolar protein sorting-associated protein 35 OS=Homo sapiens OX=9606 GN=VPS35 PE=1 SV=2	N-Term(TMT6plex); [Y]8(Phospho)
	SHB																0.338168	0.318745	0.250227	0.706761	2.15897	0.754575	1	SH2 domain-containing adapter protein B OS=Homo sapiens OX=9606 GN=SHB PE=1 SV=2	N-Term(TMT6plex); [Y]12(Phospho)
	RIN1											2.22399	1.78425	0.0732346	1.06464	0.679339	0.665144	0.102059	0.458129	-0.596628	1.06504	0.751919	2	Ras and Rab interactor 1 OS=Homo sapiens OX=9606 GN=RIN1 PE=1 SV=4	N-Term(TMT6plex); K2(TMT6plex); [Y]9(Phospho)
	BCAR1											0.935516	-0.23079	1.47506	1.16529	0.385148						0.746044	1	Breast cancer anti-estrogen resistance protein 1 OS=Homo sapiens OX=9606 GN=BCAR1 PE=1 SV=2	N-Term(TMT6plex); S12(Phospho); [Y]19(Phospho)
	CTNND1																0.576403	2.06103	-1.32397	0.636848	1.77026	0.744112	1	Catenin delta-1 OS=Homo sapiens OX=9606 GN=CTNND1 PE=1 SV=1	N-Term(TMT6plex); [Y]13(Phospho); S15(Phospho)
	DSP						0.944001	0.0314565	1.01407	1.23976	0.473015											0.74046	1	Desmoplakin OS=Homo sapiens OX=9606 GN=DSP PE=1 SV=3	N-Term(TMT6plex); [Y]9(Phospho)
	RPSA	0.944001	0.0314565	1.01407	1.23976	0.473015																0.74046	1	40S ribosomal protein SA OS=Homo sapiens OX=9606 GN=RPSA PE=1 SV=4	N-Term(TMT6plex); [Y]11(Phospho); C20(Carbamidomethyl)
	SH3PXD2A											0.209918	0.192361	1.01127	1.55054	0.735655						0.739948	1	SH3 and PX domain-containing protein 2A OS=Homo sapiens OX=9606 GN=SH3PXD2A PE=1 SV=1	N-Term(TMT6plex); [Y]6(Phospho)
	ERBIN											1.4214	0.865303	0.223093	0.885385	0.890791	1.13744	0.740569	-0.3627	0.273941	1.26458	0.73398	2	Erbin OS=Homo sapiens OX=9606 GN=ERBIN PE=1 SV=2	N-Term(TMT6plex); [Y]9(Phospho)
	TNS1	0.727462	1.51218	1.72049	2.22397	1.37552											-1.0367	1.47605	-2.07155	0.384199	1.015	0.732662	2	Tensin-1 OS=Homo sapiens OX=9606 GN=TNS1 PE=1 SV=2	N-Term(TMT6plex); [Y]7(Phospho); T9(Phospho)
	ALDOA	-0.0249083	0.578404	0.81014	2.19372	0.103636																0.732199	1	Fructose-bisphosphate aldolase A OS=Homo sapiens OX=9606 GN=ALDOA PE=1 SV=2	N-Term(TMT6plex); [Y]2(Phospho); K12(TMT6plex)
	CTNNA1	1.36955	0.791551	-1.07407	5.13147	2.50983	0.481234	0.206932	1.72206	-0.273937	1.35472	1.77232	0.745206	-1.0975	0.182588	0.58681	0.548013	0.589428	-0.706944	-0.560803	0.339891	0.730918	4	Catenin alpha-1 OS=Homo sapiens OX=9606 GN=CTNNA1 PE=1 SV=1	N-Term(TMT6plex); [Y]12(Phospho); K13(TMT6plex)
	FLNA	0.737759	1.06884	1.73093	0.94907	1.27624						0.503043	0.751405	0.697686	1.14476	1.02478	0.291875	1.09283	-1.61589	0.656977	0.592166	0.726831	3	Filamin-A OS=Homo sapiens OX=9606 GN=FLNA PE=1 SV=4	N-Term(TMT6plex); [Y]11(Phospho)
	TNS1	0.872727	1.65778	1.75219	1.19118	1.0883						0.491649	0.583763	0.876932	1.11175	0.57288	-0.351788	1.4619	-1.53968	-0.254466	1.35099	0.724407	3	Tensin-1 OS=Homo sapiens OX=9606 GN=TNS1 PE=1 SV=2	N-Term(TMT6plex); [Y]4(Phospho)
	TMEM204																0.98798	0.655123	0.703822	0.294391	0.976328	0.723529	1	Transmembrane protein 204 OS=Homo sapiens OX=9606 GN=TMEM204 PE=2 SV=1	N-Term(TMT6plex); [Y]6(Phospho); C11(Carbamidomethyl)
	CASKIN2	0.864524	0.547115	1.13547	0.841535	1.03575	0.688776	0.221413	1.44438	1.49333	0.78663	0.843427	0.735615	-0.0111578	1.50847	0.758507	1.08345	0.480673	-0.520041	0.159331	0.361648	0.722943	4	Caskin-2 OS=Homo sapiens OX=9606 GN=CASKIN2 PE=1 SV=2	N-Term(TMT6plex); [Y]3(Phospho)
	PLEKHA7						3.20889	2.61436	2.98189	2.97243	3.42997	0.501169	0.082507	-1.50848	0.423463	0.294744	-0.716037	-0.500643	-2.08597	-0.836269	-0.148477	0.714237	3	Pleckstrin homology domain-containing family A member 7 OS=Homo sapiens OX=9606 GN=PLEKHA7 PE=1 SV=2	N-Term(TMT6plex); [Y]4(Phospho); K8(TMT6plex)
	PTPRA	0.620818	-0.282581	2.01883	1.48922	3.02424	-1.02795	-0.995829	0.470146	-0.608032	-0.1574	0.899532	0.279073	0.736825	1.51722	1.79525	-0.218928	1.59408	0.424681	0.216751	2.44078	0.711837	4	Receptor-type tyrosine-protein phosphatase alpha OS=Homo sapiens OX=9606 GN=PTPRA PE=1 SV=3	N-Term(TMT6plex); [Y]12(Phospho); K16(TMT6plex)
	GRB7																-0.837347	2.60318	-1.1213	1.87247	1.00291	0.703983	1	Growth factor receptor-bound protein 7 OS=Homo sapiens OX=9606 GN=GRB7 PE=1 SV=2	N-Term(TMT6plex); [Y]2(Phospho); C8(Carbamidomethyl)
	SLAMF6	0.594323	1.02665	0.793503	2.1709	1.73137	-0.651876	-1.28708	0.849581	0.103337	-0.0203694	2.30699	-0.178329	1.5879	0.044607	1.95875	0.660934	1.62823	1.34117	-0.783501	0.119922	0.69985	4	SLAM family member 6 OS=Homo sapiens OX=9606 GN=SLAMF6 PE=1 SV=3	N-Term(TMT6plex); [Y]8(Phospho); K15(TMT6plex)
	DYRK1A	0.994885	0.952815	0.867927	2.45794	0.845963											0.270189	0.336261	-0.316655	-0.190688	0.745072	0.696371	2	Dual specificity tyrosine-phosphorylation-regulated kinase 1A OS=Homo sapiens OX=9606 GN=DYRK1A PE=1 SV=2	N-Term(TMT6plex); [Y]11(Phospho); K16(TMT6plex)
	KIAA1217	1.26095	1.38727	1.69136	1.70773	1.91604	0.541836	-0.125075	0.0654578	0.189216	-0.531792						0.434083	0.556978	-0.948662	0.542076	1.63285	0.688021	3	Sickle tail protein homolog OS=Homo sapiens OX=9606 GN=KIAA1217 PE=1 SV=2	N-Term(TMT6plex); [Y]5(Phospho)
	LPP	-0.66636	0.40908	0.711504	0.311466	0.477728	3.63959	1.9154	2.8265	2.18074	3.0041						-0.5244	-0.538727	-1.14308	-1.22132	-1.0877	0.686301	3	Lipoma-preferred partner OS=Homo sapiens OX=9606 GN=LPP PE=1 SV=1	N-Term(TMT6plex); [Y]1(Phospho)
	LCK	1.01544	0.286908	0.240157	1.1126	0.71798	0.147598	-0.516496	0.534599	0.826283	0.212419	1.63441	1.95389	0.83299	0.355129	0.373259	3.68277	1.13091	0.0405704	-0.848815	-0.0856886	0.682345	4	Tyrosine-protein kinase Lck OS=Homo sapiens OX=9606 GN=LCK PE=1 SV=6	N-Term(TMT6plex); [Y]8(Phospho)
	CSRP1	-0.788191	0.433719	0.680059	0.280371	-0.184642	0.560109	0.811704	1.47944	2.20645	1.29083											0.676986	2	Cysteine and glycine-rich protein 1 OS=Homo sapiens OX=9606 GN=CSRP1 PE=1 SV=3	N-Term(TMT6plex); [Y]3(Phospho); C10(Carbamidomethyl); K17(TMT6plex)
	EGFR																-0.227281	-0.133141	1.2466	0.702908	1.79463	0.676742	1	Epidermal growth factor receptor OS=Homo sapiens OX=9606 GN=EGFR PE=1 SV=2	N-Term(TMT6plex); S6(Phospho); [Y]12(Phospho); K19(TMT6plex)
	ELMO2	1.17863	0.365147	0.296717	0.992917	1.42689						-0.179604	0.486006	0.768382	0.424797	0.823849						0.658373	2	Engulfment and cell motility protein 2 OS=Homo sapiens OX=9606 GN=ELMO2 PE=1 SV=2	N-Term(TMT6plex); C3(Carbamidomethyl); [Y]13(Phospho)
	PDLIM4	-0.579295	0.531083	0.332368	0.207371	0.612173	2.50719	1.14628	1.88777	3.09925	3.4914						0.61712	-0.941396	-1.2388	-1.08676	-0.762536	0.654881	3	PDZ and LIM domain protein 4 OS=Homo sapiens OX=9606 GN=PDLIM4 PE=1 SV=2	N-Term(TMT6plex); [Y]8(Phospho)
	TJP1						1.39861	1.76513	1.56642	3.14915	1.23895						-0.329616	-0.458932	-1.70393	0.128404	-0.245245	0.650894	2	Tight junction protein ZO-1 OS=Homo sapiens OX=9606 GN=TJP1 PE=1 SV=3	N-Term(TMT6plex); [Y]9(Phospho)
	YES1						2.88115	2.00033	2.27625	3.47789	3.59061	-0.127462	-0.603413	-0.423085	-0.988853	-0.984817	0.229952	-1.24205	0.175807	-0.58935	0.039082	0.647469	3	Tyrosine-protein kinase Yes OS=Homo sapiens OX=9606 GN=YES1 PE=1 SV=3; Tyrosine-protein kinase Fyn OS=Homo sapiens OX=9606 GN=FYN PE=1 SV=3	N-Term(TMT6plex); K1(TMT6plex); [Y]8(Phospho)
	FLNA	-0.00227107	-0.0868198	1.69679	0.861247	1.9917						0.0966294	0.401575	0.540736	0.448841	0.469502						0.641793	2	Filamin-A OS=Homo sapiens OX=9606 GN=FLNA PE=1 SV=4	N-Term(TMT6plex); [Y]1(Phospho); C4(Carbamidomethyl)
	ACP1	0.0371173	0.253325	-0.181228	0.791318	-0.128946	1.51407	1.11773	1.48358	1.41827	1.95001						0.502253	0.712675	0.151588	0.533242	-0.562179	0.639521	3	Low molecular weight phosphotyrosine protein phosphatase OS=Homo sapiens OX=9606 GN=ACP1 PE=1 SV=3	N-Term(TMT6plex); [Y]8(Phospho); C22(Carbamidomethyl)
	TPPP3	1.72785	-0.299885	1.07885	-0.24353	0.932761																0.639209	1	Tubulin polymerization-promoting protein family member 3 OS=Homo sapiens OX=9606 GN=TPPP3 PE=1 SV=1	N-Term(TMT6plex); [Y]9(Phospho); K14(TMT6plex)
	SRC	1.34856	-0.0166729	0.931027	0.85171	2.1305											0.438338	-0.283091	-0.332481	1.20629	0.0240824	0.629827	2	Proto-oncogene tyrosine-protein kinase Src OS=Homo sapiens OX=9606 GN=SRC PE=1 SV=3	N-Term(TMT6plex); [Y]3(Phospho); C4(Carbamidomethyl); K14(TMT6plex)
	GSK3A	0.225478	-1.50609	0.872715	0.30033	1.44001	3.30931	0.314396	2.45824	3.69106	2.81584	-0.450692	0.138	-0.343349	0.462591	-0.13253	1.51151	-1.40547	0.86743	-0.271597	-1.75337	0.627191	4	Glycogen synthase kinase-3 alpha OS=Homo sapiens OX=9606 GN=GSK3A PE=1 SV=2; Glycogen synthase kinase-3 beta OS=Homo sapiens OX=9606 GN=GSK3B PE=1 SV=2	N-Term(TMT6plex); [Y]7(Phospho); C9(Carbamidomethyl)
	CORO1C	-0.366567	0.221547	0.489261	2.44749	0.306842																0.619715	1	Coronin-1C OS=Homo sapiens OX=9606 GN=CORO1C PE=1 SV=1	N-Term(TMT6plex); [Y]10(Phospho); K20(TMT6plex)
	VIM	0.675527	0.784853	0.116612	0.846153	0.601869	2.40282	2.13453	2.15603	0.991594	0.979082	1.98421	0.110229	0.5053	-0.157431	1.07521	0.236238	0.165506	-0.452896	-1.84496	-0.966543	0.617196	4	Vimentin OS=Homo sapiens OX=9606 GN=VIM PE=1 SV=4	N-Term(TMT6plex); [Y]11(Phospho)
	ARHGAP35						-1.10618	-0.571605	1.75966	0.225279	0.0822787	1.29228	0.63094	0.578322	0.910876	0.768347	0.477152	1.14399	0.300637	1.30796	1.40482	0.613651	3	Rho GTPase-activating protein 35 OS=Homo sapiens OX=9606 GN=ARHGAP35 PE=1 SV=3	N-Term(TMT6plex); [Y]7(Phospho); K17(TMT6plex)
	SLC25A5	0.456119	-0.70303	1.83143	0.296186	1.18357																0.612855	1	ADP/ATP translocase 2 OS=Homo sapiens OX=9606 GN=SLC25A5 PE=1 SV=7	N-Term(TMT6plex); [Y]7(Phospho); K11(TMT6plex)
	KCTD12	1.15754	1.05664	1.52345	2.51784	1.30611											-0.0507452	-0.233611	-1.41661	0.095348	0.139589	0.609555	2	BTB/POZ domain-containing protein KCTD12 OS=Homo sapiens OX=9606 GN=KCTD12 PE=1 SV=1	N-Term(TMT6plex); [Y]4(Phospho)
	DSP	1.57619	1.03291	1.58217	0.298693	2.91						2.24086	0.740658	-2.42202	0.305509	0.107777	0.350479	0.342867	0.433012	-0.29909	-0.0666538	0.608891	3	Desmoplakin OS=Homo sapiens OX=9606 GN=DSP PE=1 SV=3	N-Term(TMT6plex); [Y]11(Phospho); C12(Carbamidomethyl)
	PKP2						1.85139	0.281476	0.234288	1.29446	0.895301						-0.932968	2.42354	-1.97546	0.588405	1.41574	0.607617	2	Plakophilin-2 OS=Homo sapiens OX=9606 GN=PKP2 PE=1 SV=2	N-Term(TMT6plex); [Y]5(Phospho)
	GDI2	0.435049	0.845847	1.22767	1.76602	0.992444	2.18751	1.16278	0.838465	2.38537	1.6389	-0.587567	0.147927	-0.242241	0.827011	0.424386	-0.0677405	-0.68815	-1.18255	0.359139	-0.31922	0.607552	4	Rab GDP dissociation inhibitor beta OS=Homo sapiens OX=9606 GN=GDI2 PE=1 SV=2	N-Term(TMT6plex); C9(Carbamidomethyl); [Y]10(Phospho)
	NEDD9	0.847946	0.606799	1.39784	0.937378	0.994465	0.820599	0.333611	0.215432	1.24735	1.02297	1.05169	1.28703	1.14905	1.25507	1.30735	-0.65178	0.0506631	-1.53639	-0.462052	0.21684	0.604593	4	Enhancer of filamentation 1 OS=Homo sapiens OX=9606 GN=NEDD9 PE=1 SV=1	N-Term(TMT6plex); [Y]7(Phospho)
	MAPK3	1.027	1.8663	2.3371	1.20039	1.93408	0.354172	-0.913892	0.779516	1.11135	1.10958	-0.0944207	-1.00217	-0.791286	1.11453	1.20163	0.0773689	-0.303505	-0.737272	0.384981	1.41155	0.603351	4	Mitogen-activated protein kinase 3 OS=Homo sapiens OX=9606 GN=MAPK3 PE=1 SV=4	N-Term(TMT6plex); T13(Phospho); [Y]15(Phospho)
	PRKCD	0.653749	0.458989	2.30744	2.42207	2.32125	-2.135	-1.76325	-0.235542	-1.92237	-1.86797	2.69433	1.53118	-0.796178	2.39714	1.04902	0.0440031	-0.204085	0.714836	1.39936	2.94688	0.600793	4	Protein kinase C delta type OS=Homo sapiens OX=9606 GN=PRKCD PE=1 SV=2	N-Term(TMT6plex); [Y]12(Phospho); K17(TMT6plex)
	LDHA						-1.27192	0.0731005	0.375729	0.114971	0.592395	1.82449	1.87812	0.88861	0.203611	1.25604						0.593514	2	L-lactate dehydrogenase A chain OS=Homo sapiens OX=9606 GN=LDHA PE=1 SV=2	N-Term(TMT6plex); [Y]7(Phospho); K11(TMT6plex)
	MAPK1	0.71295	1.18717	1.7198	0.437263	1.6504	1.33086	1.21385	1.40625	1.36532	1.36818	-0.487506	-0.85437	-0.60712	0.93841	1.4226	0.379197	-0.93556	-0.934785	-0.0254483	0.418208	0.585283	4	Mitogen-activated protein kinase 1 OS=Homo sapiens OX=9606 GN=MAPK1 PE=1 SV=3	N-Term(TMT6plex); T13(Phospho); [Y]15(Phospho)
	DPYSL2	-0.755109	-0.600977	1.74808	0.134636	2.38418																0.582161	1	Dihydropyrimidinase-related protein 2 OS=Homo sapiens OX=9606 GN=DPYSL2 PE=1 SV=1; Dihydropyrimidinase-related protein 3 OS=Homo sapiens OX=9606 GN=DPYSL3 PE=1 SV=1	N-Term(TMT6plex); [Y]9(Phospho); K20(TMT6plex)
	MAPK14	1.40192	1.27896	1.71489	1.10073	1.0428	-0.74787	-1.00689	1.11149	0.380995	0.592001	1.09422	0.910633	0.202667	1.09586	0.550839	-0.446663	1.60151	-1.60376	0.44364	0.795682	0.575682	4	Mitogen-activated protein kinase 14 OS=Homo sapiens OX=9606 GN=MAPK14 PE=1 SV=3	N-Term(TMT6plex); [Y]9(Phospho)
	HIPK3																0.340768	0.712657	-0.608384	0.594063	1.7854	0.564901	1	Homeodomain-interacting protein kinase 3 OS=Homo sapiens OX=9606 GN=HIPK3 PE=1 SV=1	N-Term(TMT6plex); C3(Carbamidomethyl); [Y]6(Phospho); S9(Phospho)
	MAPK10						0.793736	1.45644	2.02711	3.0909	2.57414						-0.834236	-0.757484	-1.3883	-1.43233	0.107403	0.563738	2	Mitogen-activated protein kinase 10 OS=Homo sapiens OX=9606 GN=MAPK10 PE=1 SV=2; Mitogen-activated protein kinase 8 OS=Homo sapiens OX=9606 GN=MAPK8 PE=1 SV=2	N-Term(TMT6plex); [Y]11(Phospho)
	PIK3R1	1.09661	1.47654	1.93353	1.127	1.51982						0.160385	0.0225326	0.269829	0.679351	0.364198	-0.789139	0.750068	-1.55065	0.515382	0.808798	0.55895	3	Phosphatidylinositol 3-kinase regulatory subunit alpha OS=Homo sapiens OX=9606 GN=PIK3R1 PE=1 SV=2; Phosphatidylinositol 3-kinase regulatory subunit gamma OS=Homo sapiens OX=9606 GN=PIK3R3 PE=1 SV=2	N-Term(TMT6plex); [Y]6(Phospho)
	PRKAR1B	-0.276416	-0.143919	1.37074	0.537093	1.29512																0.556525	1	cAMP-dependent protein kinase type I-beta regulatory subunit OS=Homo sapiens OX=9606 GN=PRKAR1B PE=1 SV=4	N-Term(TMT6plex); [Y]7(Phospho)
	DBNL	-0.594245	-0.444171	-0.523121	0.384508	-0.821737	1.15754	1.05664	1.52345	2.51784	1.30611											0.556281	2	Drebrin-like protein OS=Homo sapiens OX=9606 GN=DBNL PE=1 SV=1	N-Term(TMT6plex); [Y]14(Phospho); K16(TMT6plex)
	ANXA2	0.291787	0.723563	1.50019	1.48402	0.540717						0.374496	0.369519	0.262982	0.074197	1.03058	0.331028	0.525433	0.28117	-0.0962185	0.639545	0.555534	3	Annexin A2 OS=Homo sapiens OX=9606 GN=ANXA2 PE=1 SV=2	N-Term(TMT6plex); [Y]10(Phospho)
	STAM2	-0.0386763	0.0278343	-0.986472	1.31724	-0.0843733	1.34856	-0.0166729	0.931027	0.85171	2.1305											0.548068	2	Signal transducing adapter molecule 2 OS=Homo sapiens OX=9606 GN=STAM2 PE=1 SV=1	N-Term(TMT6plex); [Y]11(Phospho); K13(TMT6plex)
	PDLIM4	-0.396855	-0.353431	0.733888	-0.725422	-0.201433	2.70286	2.01805	2.61277	3.63726	2.85269						-0.491521	-0.622185	-1.51015	-1.60075	-0.538969	0.54112	3	PDZ and LIM domain protein 4 OS=Homo sapiens OX=9606 GN=PDLIM4 PE=1 SV=2	N-Term(TMT6plex); [Y]2(Phospho)
	GSK3A	-0.530564	0.406556	1.70443	0.527879	0.581886																0.538038	1	Glycogen synthase kinase-3 alpha OS=Homo sapiens OX=9606 GN=GSK3A PE=1 SV=2; Glycogen synthase kinase-3 beta OS=Homo sapiens OX=9606 GN=GSK3B PE=1 SV=2	N-Term(TMT6plex); [Y]11(Phospho); C13(Carbamidomethyl)
	ARHGDIA	0.883626	0.540882	1.46854	0.658925	0.411491											-0.0515229	0.984684	-0.79064	0.41826	0.809	0.533324	2	Rho GDP-dissociation inhibitor 1 OS=Homo sapiens OX=9606 GN=ARHGDIA PE=1 SV=3	N-Term(TMT6plex); [Y]6(Phospho)
	TNS1	1.28467	1.72587	1.84904	1.35612	1.1481											-1.34764	1.18994	-2.23353	-0.347984	0.704387	0.532898	2	Tensin-1 OS=Homo sapiens OX=9606 GN=TNS1 PE=1 SV=2	N-Term(TMT6plex); [Y]7(Phospho)
	ESYT1	0.639837	0.854084	1.68593	2.02449	0.894357	1.17863	0.365147	0.296717	0.992917	1.42689	0.539764	0.181565	0.567605	0.814428	0.0753531	-0.834255	0.0178031	-1.1013	-0.174321	0.0920511	0.526885	4	Extended synaptotagmin-1 OS=Homo sapiens OX=9606 GN=ESYT1 PE=1 SV=1	N-Term(TMT6plex); [Y]5(Phospho); K16(TMT6plex)
	POF1B	1.49309	0.33228	0.166811	0.909975	1.69829											0.600283	0.110803	-0.277671	-0.208098	0.421871	0.524764	2	Protein POF1B OS=Homo sapiens OX=9606 GN=POF1B PE=1 SV=3	N-Term(TMT6plex); [Y]12(Phospho); K14(TMT6plex)
	AFAP1L2	1.49838	-0.750766	0.953065	-0.317172	1.23465																0.523631	1	Actin filament-associated protein 1-like 2 OS=Homo sapiens OX=9606 GN=AFAP1L2 PE=1 SV=1	N-Term(TMT6plex); [Y]8(Phospho); K13(TMT6plex)
	CRIP1	0.354172	-0.913892	0.779516	1.11135	1.10958	0.589343	-0.016585	0.870925	2.99683	1.93532	1.62714	0.828452	0.734178	0.316227	0.129558	-0.460211	-0.695645	0.0866164	-1.62038	0.558197	0.516035	4	Cysteine-rich protein 1 OS=Homo sapiens OX=9606 GN=CRIP1 PE=1 SV=3	N-Term(TMT6plex); [Y]3(Phospho)
	PLCG1											1.15693	0.143522	0.441146	0.736443	0.783239	0.323999	0.0366898	0.0560183	0.957416	0.475576	0.511098	2	1-phosphatidylinositol 4,5-bisphosphate phosphodiesterase gamma-1 OS=Homo sapiens OX=9606 GN=PLCG1 PE=1 SV=1	N-Term(TMT6plex); [Y]8(Phospho)
	PDLIM5	1.10224	0.854094	1.15117	0.722194	1.14957						0.745471	0.103981	0.0840407	-0.205854	0.393629	0.434893	0.659807	-0.151563	-0.578834	1.17843	0.509551	3	PDZ and LIM domain protein 5 OS=Homo sapiens OX=9606 GN=PDLIM5 PE=1 SV=5	N-Term(TMT6plex); [Y]5(Phospho); K15(TMT6plex)
	CTTN	0.138161	-0.453402	1.3987	1.19762	2.40847	-0.791172	-0.4263	-0.306001	-1.01525	-1.61124	1.28228	0.803579	2.26241	0.569336	0.849391	-0.026608	0.979983	-0.209008	0.743198	2.20838	0.500126	4	Src substrate cortactin OS=Homo sapiens OX=9606 GN=CTTN PE=1 SV=2	N-Term(TMT6plex); [Y]7(Phospho); K14(TMT6plex)
	TNK2	-0.0320771	0.791303	1.21074	1.73314	2.23737	1.36955	0.791551	-1.07407	5.13147	2.50983	-1.42611	-0.104778	0.013905	-0.465886	-0.682484	0.49988	-0.737155	-1.77219	-0.395091	0.387594	0.499324	4	Activated CDC42 kinase 1 OS=Homo sapiens OX=9606 GN=TNK2 PE=1 SV=3	N-Term(TMT6plex); [Y]1(Phospho)
	ENO3	0.535631	1.6152	0.529282	2.94807	1.59305	-1.35528	-0.942678	0.256049	-0.745197	-0.620296	0.100955	0.797416	0.935204	0.382159	0.750789	0.695973	0.595824	0.997374	0.40197	0.505406	0.498846	4	Beta-enolase OS=Homo sapiens OX=9606 GN=ENO3 PE=1 SV=5; Gamma-enolase OS=Homo sapiens OX=9606 GN=ENO2 PE=1 SV=3; Alpha-enolase OS=Homo sapiens OX=9606 GN=ENO1 PE=1 SV=2	N-Term(TMT6plex); [Y]12(Phospho)
	CNP																1.68952	0.38817	0.682049	-0.0155737	-0.250557	0.498723	1	2,3-cyclic-nucleotide 3-phosphodiesterase OS=Homo sapiens OX=9606 GN=CNP PE=1 SV=2	N-Term(TMT6plex); [Y]8(Phospho); C9(Carbamidomethyl)
	MAPK9	0.989482	0.206794	0.433493	0.727359	0.409641	1.74135	1.25435	1.92372	3.76605	2.07407						-0.432239	-1.30106	-1.60061	-1.24437	-1.53692	0.494074	3	Mitogen-activated protein kinase 9 OS=Homo sapiens OX=9606 GN=MAPK9 PE=1 SV=2	N-Term(TMT6plex); C3(Carbamidomethyl); [Y]11(Phospho)
	TNS1	0.355118	-0.143265	1.2755	0.497832	0.461324																0.489303	1	Tensin-1 OS=Homo sapiens OX=9606 GN=TNS1 PE=1 SV=2	N-Term(TMT6plex); [Y]6(Phospho); K14(TMT6plex)
	ERBB3	1.02329	0.166456	1.78421	1.8751	1.77008	1.40726	1.20264	1.78494	1.10567	1.48224	0.261604	-0.0700929	-0.894308	-0.0487189	-0.267143	-0.703576	-0.103381	-0.844029	-1.22565	0.00804551	0.485732	4	Receptor tyrosine-protein kinase erbB-3 OS=Homo sapiens OX=9606 GN=ERBB3 PE=1 SV=1	N-Term(TMT6plex); [Y]14(Phospho)
	VCL	1.07438	0.89762	0.784089	2.01835	1.02636	1.65021	-1.4435	2.18621	0.955545	1.33893	0.896034	0.185636	-1.06019	0.504109	0.737204	-0.85602	-0.00255811	-0.483772	-0.194564	-0.626015	0.479403	4	Vinculin OS=Homo sapiens OX=9606 GN=VCL PE=1 SV=4	N-Term(TMT6plex); [Y]8(Phospho); K15(TMT6plex)
	TUBB2A	-0.742713	-0.0399888	-0.233549	2.78521	0.574163																0.468624	1	Tubulin beta-2A chain OS=Homo sapiens OX=9606 GN=TUBB2A PE=1 SV=1; Tubulin beta-3 chain OS=Homo sapiens OX=9606 GN=TUBB3 PE=1 SV=2; Tubulin beta-4A chain OS=Homo sapiens OX=9606 GN=TUBB4A PE=1 SV=2; Tubulin beta-6 chain OS=Homo sapiens OX=9606 GN=TUBB6 PE=1 SV=1; Tubulin beta chain OS=Homo sapiens OX=9606 GN=TUBB PE=1 SV=2; Tubulin beta-4B chain OS=Homo sapiens OX=9606 GN=TUBB4B PE=1 SV=1; Tubuli…	N-Term(TMT6plex); [Y]4(Phospho); K14(TMT6plex)
	PIK3R2											0.589252	0.454578	-0.790202	1.21975	0.49585	0.219307	0.830467	-1.0415	2.0741	0.593196	0.46448	2	Phosphatidylinositol 3-kinase regulatory subunit beta OS=Homo sapiens OX=9606 GN=PIK3R2 PE=1 SV=2	N-Term(TMT6plex); [Y]6(Phospho)
	GMDS											1.02281	1.64772	-1.36881	-0.451701	0.330277	0.327024	0.837143	1.85977	0.720484	-0.315168	0.460954	2	GDP-mannose 4,6 dehydratase OS=Homo sapiens OX=9606 GN=GMDS PE=1 SV=1	N-Term(TMT6plex); [Y]1(Phospho); C14(Carbamidomethyl); K16(TMT6plex)
	AKR1A1	0.0117571	-0.179631	0.321426	1.94028	0.195879																0.457941	1	Alcohol dehydrogenase [NADP(+)] OS=Homo sapiens OX=9606 GN=AKR1A1 PE=1 SV=3	N-Term(TMT6plex); [Y]7(Phospho)
	ACTB	1.01324	-0.180191	0.402835	1.28537	0.322327	0.254908	-0.0117063	0.429581	-0.358445	1.10088	0.796065	0.795365	0.363898	0.230795	0.57951	1.45938	-0.326178	0.056821	0.247251	0.692387	0.457705	4	Actin, cytoplasmic 1 OS=Homo sapiens OX=9606 GN=ACTB PE=1 SV=1; Actin, cytoplasmic 2 OS=Homo sapiens OX=9606 GN=ACTG1 PE=1 SV=1	N-Term(TMT6plex); [Y]2(Phospho)
	YES1											0.243175	-1.43203	-0.901675	2.2194	2.1484						0.455456	1	Tyrosine-protein kinase Yes OS=Homo sapiens OX=9606 GN=YES1 PE=1 SV=3	N-Term(TMT6plex); [Y]26(Phospho)
	MCAM	0.148937	-1.26355	1.58474	0.430911	1.37182																0.454571	1	Cell surface glycoprotein MUC18 OS=Homo sapiens OX=9606 GN=MCAM PE=1 SV=2	N-Term(TMT6plex); [Y]1(Phospho)
	BCAR1	1.64421	0.674908	1.62245	0.813681	0.791521	1.42061	0.0226585	0.849266	-0.0365406	0.2921	0.443565	0.642559	0.631325	0.679466	0.578835	-0.214026	0.277132	-1.56289	-0.742912	0.219567	0.452374	4	Breast cancer anti-estrogen resistance protein 1 OS=Homo sapiens OX=9606 GN=BCAR1 PE=1 SV=2	N-Term(TMT6plex); [Y]11(Phospho)
	CDH1	0.030938	-0.173064	0.213211	1.22709	0.363539	1.54203	0.500679	2.40909	2.07844	2.27714						-1.11746	-0.442716	-1.90144	-0.97505	0.628743	0.444078	3	Cadherin-1 OS=Homo sapiens OX=9606 GN=CDH1 PE=1 SV=3	N-Term(TMT6plex); [Y]1(Phospho); K20(TMT6plex)
	ACTB	0.820599	0.333611	0.215432	1.24735	1.02297											0.522721	0.00883839	-0.073124	0.25706	-0.0364106	0.431905	2	Actin, cytoplasmic 1 OS=Homo sapiens OX=9606 GN=ACTB PE=1 SV=1; Actin, cytoplasmic 2 OS=Homo sapiens OX=9606 GN=ACTG1 PE=1 SV=1	N-Term(TMT6plex); K1(TMT6plex); [Y]4(Phospho)
	DLG3																-0.569619	1.23038	-0.701634	0.521929	1.65561	0.427335	1	Disks large homolog 3 OS=Homo sapiens OX=9606 GN=DLG3 PE=1 SV=2	N-Term(TMT6plex); [Y]9(Phospho)
	HGS																0.884917	0.906114	1.05683	-0.450644	-0.267819	0.42588	1	Hepatocyte growth factor-regulated tyrosine kinase substrate OS=Homo sapiens OX=9606 GN=HGS PE=1 SV=1	N-Term(TMT6plex); C2(Carbamidomethyl); C5(Carbamidomethyl); [Y]6(Phospho)
	PFN1	1.35412	1.2546	1.64124	2.30951	0.733015	-1.01707	-1.06142	0.0723152	0.500627	-0.283482	0.0482879	1.05491	0.837926	1.3159	1.01925	-0.181618	0.47362	-2.01386	0.10938	0.289101	0.422818	4	Profilin-1 OS=Homo sapiens OX=9606 GN=PFN1 PE=1 SV=2	N-Term(TMT6plex); C1(Carbamidomethyl); [Y]2(Phospho)
	TAOK1																-0.065831	1.55162	-1.72562	1.27501	1.05547	0.41813	1	Serine/threonine-protein kinase TAO1 OS=Homo sapiens OX=9606 GN=TAOK1 PE=1 SV=1	N-Term(TMT6plex); [Y]2(Phospho); C7(Carbamidomethyl)
	PTK2	0.948537	1.70098	1.19084	0.897565	1.16348						-0.903979	-0.482373	0.107871	0.703728	-0.0236198	-0.554788	1.06256	-1.48126	0.833648	1.08542	0.416574	3	Focal adhesion kinase 1 OS=Homo sapiens OX=9606 GN=PTK2 PE=1 SV=2	N-Term(TMT6plex); [Y]12(Phospho)
	TMED7	0.63647	1.6594	-0.0944925	2.84561	1.14292	-0.49493	-0.0185778	-0.57059	0.126024	0.137142						0.875369	-0.482888	1.17251	-0.392843	-0.341965	0.413277	3	Transmembrane emp24 domain-containing protein 7 OS=Homo sapiens OX=9606 GN=TMED7 PE=1 SV=2	N-Term(TMT6plex); C2(Carbamidomethyl); [Y]4(Phospho); K12(TMT6plex)
	CDKL5											-0.639872	0.457391	-0.525405	1.57892	1.42928	-0.25104	0.902245	-1.61595	0.395723	2.38759	0.411889	2	Cyclin-dependent kinase-like 5 OS=Homo sapiens OX=9606 GN=CDKL5 PE=1 SV=1	N-Term(TMT6plex); [Y]13(Phospho)
	PDHA1	1.10771	1.52793	1.8188	0.920231	1.11859											-1.04704	1.05687	-2.45409	-0.28744	0.307327	0.406888	2	Pyruvate dehydrogenase E1 component subunit alpha, somatic form, mitochondrial OS=Homo sapiens OX=9606 GN=PDHA1 PE=1 SV=3; Pyruvate dehydrogenase E1 component subunit alpha, testis-specific form, mitochondrial OS=Homo sapiens OX=9606 GN=PDHA2 PE=1 SV=1	N-Term(TMT6plex); S5(Phospho); [Y]13(Phospho)
	CDCP1																0.352706	0.029594	-0.640931	0.195076	2.09497	0.406283	1	CUB domain-containing protein 1 OS=Homo sapiens OX=9606 GN=CDCP1 PE=1 SV=3	N-Term(TMT6plex); [Y]7(Phospho)
	LURAP1L											0.430497	-0.287787	0.152877	1.18816	0.54738						0.406225	1	Leucine rich adaptor protein 1-like OS=Homo sapiens OX=9606 GN=LURAP1L PE=1 SV=2	N-Term(TMT6plex); [Y]5(Phospho); C7(Carbamidomethyl)
	COPA																-0.580356	0.890365	-0.154218	0.313446	1.53528	0.400904	1	Coatomer subunit alpha OS=Homo sapiens OX=9606 GN=COPA PE=1 SV=2	N-Term(TMT6plex); [Y]3(Phospho); C8(Carbamidomethyl)
	MAPK7	0.688776	0.221413	1.44438	1.49333	0.78663						0.251321	1.10559	-0.631889	0.680898	0.222062	0.420815	-0.394301	0.36491	-0.584096	-0.162396	0.393829	3	Mitogen-activated protein kinase 7 OS=Homo sapiens OX=9606 GN=MAPK7 PE=1 SV=2	N-Term(TMT6plex); C3(Carbamidomethyl); [Y]16(Phospho)
	PEAK1						1.01544	0.286908	0.240157	1.1126	0.71798						0.601738	0.905361	-0.541851	-1.01222	0.547183	0.387329	2	Inactive tyrosine-protein kinase PEAK1 OS=Homo sapiens OX=9606 GN=PEAK1 PE=1 SV=4	N-Term(TMT6plex); [Y]1(Phospho)
	FLNA	0.632779	0.23203	1.54277	0.693107	1.42313						0.0805104	1.06536	0.272192	0.629212	0.635296	-0.0748387	-0.613676	-0.74546	-0.0298481	0.0499469	0.386167	3	Filamin-A OS=Homo sapiens OX=9606 GN=FLNA PE=1 SV=4	N-Term(TMT6plex); K1(TMT6plex); [Y]12(Phospho)
	ANKS1A											0.182069	0.0927893	-0.841189	1.18247	-0.0310976	-0.403102	0.0569812	0.576506	1.44018	1.58857	0.384418	2	Ankyrin repeat and SAM domain-containing protein 1A OS=Homo sapiens OX=9606 GN=ANKS1A PE=1 SV=4	N-Term(TMT6plex); [Y]7(Phospho); K16(TMT6plex)
	CTTN	-0.894091	0.233575	-0.336707	2.18191	0.734745																0.383886	1	Src substrate cortactin OS=Homo sapiens OX=9606 GN=CTTN PE=1 SV=2	N-Term(TMT6plex); K3(TMT6plex); [Y]18(Phospho); K20(TMT6plex)
	DDR2											1.5021	0.866972	-0.169789	1.01745	0.966212	1.06479	0.343986	0.366066	-1.22281	-0.913917	0.382105	2	Discoidin domain-containing receptor 2 OS=Homo sapiens OX=9606 GN=DDR2 PE=1 SV=2	N-Term(TMT6plex); [Y]3(Phospho)
	PARD3B																0.0294761	1.28357	-0.561769	0.260616	0.870988	0.376575	1	Partitioning defective 3 homolog B OS=Homo sapiens OX=9606 GN=PARD3B PE=1 SV=2	N-Term(TMT6plex); [Y]6(Phospho)
	CTTN																-0.578385	0.328239	0.139095	-0.122177	2.1132	0.375994	1	Src substrate cortactin OS=Homo sapiens OX=9606 GN=CTTN PE=1 SV=2	N-Term(TMT6plex); S4(Phospho); [Y]7(Phospho); K14(TMT6plex)
	GSK3A	1.65927	0.794096	2.5741	0.795142	1.67335						-0.77619	0.0641783	-0.0644185	1.10641	0.195048	-0.00362701	-1.47374	-1.25673	0.347035	-0.0262013	0.373848	3	Glycogen synthase kinase-3 alpha OS=Homo sapiens OX=9606 GN=GSK3A PE=1 SV=2; Glycogen synthase kinase-3 beta OS=Homo sapiens OX=9606 GN=GSK3B PE=1 SV=2	N-Term(TMT6plex); [Y]7(Phospho); C9(Carbamidomethyl); S10(Phospho)
	LMO7	1.02317	2.0814	1.79146	2.16775	1.22642											-0.831603	-1.45728	-1.2808	-1.34978	0.290681	0.366142	2	LIM domain only protein 7 OS=Homo sapiens OX=9606 GN=LMO7 PE=1 SV=3	N-Term(TMT6plex); C6(Carbamidomethyl); C9(Carbamidomethyl); [Y]10(Phospho)
	EPHA4	0.141247	-0.775236	0.820865	1.94365	0.799943	-0.840013	-1.27712	0.88768	0.976658	1.24176						0.239307	-1.09787	0.83438	-0.54805	2.12172	0.364594	3	Ephrin type-A receptor 4 OS=Homo sapiens OX=9606 GN=EPHA4 PE=1 SV=1; Ephrin type-A receptor 5 OS=Homo sapiens OX=9606 GN=EPHA5 PE=1 SV=3; Ephrin type-A receptor 3 OS=Homo sapiens OX=9606 GN=EPHA3 PE=1 SV=2	N-Term(TMT6plex); [Y]10(Phospho)
	ESYT1	-0.703507	-0.951395	1.06242	1.57855	0.836878																0.36459	1	Extended synaptotagmin-1 OS=Homo sapiens OX=9606 GN=ESYT1 PE=1 SV=1	N-Term(TMT6plex); [Y]6(Phospho); K15(TMT6plex)
	YES1	0.286122	-1.25056	1.25042	1.0384	2.16397											0.635533	0.117768	-0.899807	-0.657191	0.941043	0.362569	2	Tyrosine-protein kinase Yes OS=Homo sapiens OX=9606 GN=YES1 PE=1 SV=3	N-Term(TMT6plex); K1(TMT6plex); [Y]27(Phospho)
	PIK3R1	0.478558	0.0592499	0.614874	0.165741	0.486742																0.361033	1	Phosphatidylinositol 3-kinase regulatory subunit alpha OS=Homo sapiens OX=9606 GN=PIK3R1 PE=1 SV=2	N-Term(TMT6plex); [Y]5(Phospho); K12(TMT6plex)
	ANXA6						-0.0224196	0.0652385	0.645625	0.769862	0.346371											0.360935	1	Annexin A6 OS=Homo sapiens OX=9606 GN=ANXA6 PE=1 SV=3	N-Term(TMT6plex); [Y]3(Phospho); K7(TMT6plex)
	GCHFR																0.065384	1.16781	-0.138632	-0.326072	1.01427	0.356552	1	GTP cyclohydrolase 1 feedback regulatory protein OS=Homo sapiens OX=9606 GN=GCHFR PE=1 SV=3	N-Term(TMT6plex); [Y]9(Phospho)
	ACTB											-0.124359	0.284779	-1.12353	2.20729	0.533639						0.355565	1	Actin, cytoplasmic 1 OS=Homo sapiens OX=9606 GN=ACTB PE=1 SV=1; POTE ankyrin domain family member E OS=Homo sapiens OX=9606 GN=POTEE PE=2 SV=3; Actin, cytoplasmic 2 OS=Homo sapiens OX=9606 GN=ACTG1 PE=1 SV=1	N-Term(TMT6plex); C2(Carbamidomethyl); [Y]3(Phospho); K23(TMT6plex)
	TAGLN	-1.35528	-0.942678	0.256049	-0.745197	-0.620296	0.400912	0.726284	1.24763	3.0607	1.4335											0.346163	2	Transgelin OS=Homo sapiens OX=9606 GN=TAGLN PE=1 SV=4	N-Term(TMT6plex); [Y]5(Phospho); K9(TMT6plex)
	PXN	-0.145602	0.121235	0.819149	0.644826	0.85946	-1.00459	0.725198	1.94018	0.881356	1.8187	-0.0701947	0.286736	0.194214	-0.177738	0.491945	-0.406589	-0.376226	0.272581	-0.486786	0.522275	0.345507	4	Paxillin OS=Homo sapiens OX=9606 GN=PXN PE=1 SV=3	N-Term(TMT6plex); [Y]8(Phospho); K13(TMT6plex)
	MAPK3											0.084436	0.0533301	-0.0589261	0.794615	0.84388						0.343467	1	Mitogen-activated protein kinase 3 OS=Homo sapiens OX=9606 GN=MAPK3 PE=1 SV=4	N-Term(TMT6plex); T9(Phospho); T13(Phospho); [Y]15(Phospho)
	LCP1	-0.228756	1.35401	-1.40053	0.84275	-0.867017						2.4634	1.07208	0.22975	-0.49266	0.456909						0.342993	2	Plastin-2 OS=Homo sapiens OX=9606 GN=LCP1 PE=1 SV=6	N-Term(TMT6plex); [Y]8(Phospho); K19(TMT6plex)
	PEAK1	-0.047788	-1.82733	1.16196	-0.175797	1.54871						0.880568	0.122046	0.580022	-0.0262635	1.15292						0.336905	2	Inactive tyrosine-protein kinase PEAK1 OS=Homo sapiens OX=9606 GN=PEAK1 PE=1 SV=4	N-Term(TMT6plex); [Y]10(Phospho); K17(TMT6plex)
	JAK2	-0.74787	-1.00689	1.11149	0.380995	0.592001	1.84346	2.40398	1.95017	2.72112	2.039	-0.565021	-0.999418	0.372054	-0.476016	0.130043	-0.438459	-1.48835	-0.231118	-1.27088	0.371736	0.334602	4	Tyrosine-protein kinase JAK2 OS=Homo sapiens OX=9606 GN=JAK2 PE=1 SV=2	N-Term(TMT6plex); [Y]5(Phospho); K16(TMT6plex)
	PDHA1	1.23992	1.16073	0.997722	0.80626	1.00929						0.624577	0.59595	-0.174932	1.08216	-0.0871672	-0.979328	1.24059	-2.27353	-0.790992	0.541452	0.332846	3	Pyruvate dehydrogenase E1 component subunit alpha, somatic form, mitochondrial OS=Homo sapiens OX=9606 GN=PDHA1 PE=1 SV=3; Pyruvate dehydrogenase E1 component subunit alpha, testis-specific form, mitochondrial OS=Homo sapiens OX=9606 GN=PDHA2 PE=1 SV=1	N-Term(TMT6plex); [Y]13(Phospho)
	PLCG2																1.08808	0.619089	-1.84496	0.570696	1.21975	0.33053	1	1-phosphatidylinositol 4,5-bisphosphate phosphodiesterase gamma-2 OS=Homo sapiens OX=9606 GN=PLCG2 PE=1 SV=4	N-Term(TMT6plex); [Y]6(Phospho)
	FHL1	-0.791172	-0.4263	-0.306001	-1.01525	-1.61124	1.5496	1.19776	1.77768	0.817321	2.09473											0.328713	2	Four and a half LIM domains protein 1 OS=Homo sapiens OX=9606 GN=FHL1 PE=1 SV=4	N-Term(TMT6plex); [Y]9(Phospho); C10(Carbamidomethyl); C13(Carbamidomethyl); K15(TMT6plex)
	SSBP1	-1.14711	1.35865	2.33745	1.91987	3.56817						-1.15271	-0.63393	0.50706	0.553749	-0.308016	-0.476313	-0.826349	-0.545918	1.08448	-1.30853	0.328703	3	Single-stranded DNA-binding protein, mitochondrial OS=Homo sapiens OX=9606 GN=SSBP1 PE=1 SV=1	N-Term(TMT6plex); [Y]7(Phospho); K15(TMT6plex)
	PTPRB																-0.352626	0.478483	0.157268	0.275649	1.0699	0.325734	1	Receptor-type tyrosine-protein phosphatase beta OS=Homo sapiens OX=9606 GN=PTPRB PE=1 SV=3	N-Term(TMT6plex); [Y]11(Phospho)
	LPP						1.07438	0.89762	0.784089	2.01835	1.02636	-0.723739	-0.46099	-0.147056	-0.874826	-0.364772						0.322941	2	Lipoma-preferred partner OS=Homo sapiens OX=9606 GN=LPP PE=1 SV=1	N-Term(TMT6plex); [Y]2(Phospho)
	NEDD9											1.01443	0.892366	-0.122081	-0.171225	-0.0119479						0.320308	1	Enhancer of filamentation 1 OS=Homo sapiens OX=9606 GN=NEDD9 PE=1 SV=1	N-Term(TMT6plex); [Y]2(Phospho)
	TNS2	0.226744	-0.725233	0.636321	0.370342	1.64695	0.728655	0.731716	1.44592	2.85479	1.87687	0.327974	-0.402276	-0.674115	-0.0744434	0.137769	-0.812458	-0.443336	1.03403	-1.86557	-0.628176	0.319624	4	Tensin-2 OS=Homo sapiens OX=9606 GN=TNS2 PE=1 SV=2	N-Term(TMT6plex); [Y]8(Phospho)
	PTK2B											1.92117	0.429616	-0.479308	-0.185445	1.17455	0.312155	1.05198	-0.305543	-0.774865	0.0431112	0.318742	2	Protein-tyrosine kinase 2-beta OS=Homo sapiens OX=9606 GN=PTK2B PE=1 SV=2	N-Term(TMT6plex); [Y]7(Phospho); K9(TMT6plex)
	WRNIP1																0.2681	0.377916	-0.191464	0.780304	0.331724	0.313316	1	ATPase WRNIP1 OS=Homo sapiens OX=9606 GN=WRNIP1 PE=1 SV=2	N-Term(TMT6plex); [Y]10(Phospho)
	ITGB4																-0.424086	1.97695	-1.71185	0.452845	1.2396	0.30669	1	Integrin beta-4 OS=Homo sapiens OX=9606 GN=ITGB4 PE=1 SV=5	N-Term(TMT6plex); [Y]2(Phospho)
	CTNND1											1.0183	0.506367	-0.170235	1.04204	0.180374	-0.382408	1.24138	-2.09776	0.402947	1.23806	0.297908	2	Catenin delta-1 OS=Homo sapiens OX=9606 GN=CTNND1 PE=1 SV=1	N-Term(TMT6plex); [Y]13(Phospho)
	GADD45GIP1	-1.00459	0.725198	1.94018	0.881356	1.8187											-0.721831	-0.380148	-1.18432	-0.649901	1.54244	0.296708	2	Growth arrest and DNA damage-inducible proteins-interacting protein 1 OS=Homo sapiens OX=9606 GN=GADD45GIP1 PE=1 SV=1	N-Term(TMT6plex); [Y]11(Phospho)
	GMDS											1.0788	1.72862	-1.2336	-0.470859	0.0836008	0.163535	0.0692225	1.85877	0.262693	-0.59205	0.294874	2	GDP-mannose 4,6 dehydratase OS=Homo sapiens OX=9606 GN=GMDS PE=1 SV=1	N-Term(TMT6plex); [Y]2(Phospho); C14(Carbamidomethyl); K16(TMT6plex)
	MAPK7																0.452439	-0.441608	0.0625822	0.2958	1.05482	0.284807	1	Mitogen-activated protein kinase 7 OS=Homo sapiens OX=9606 GN=MAPK7 PE=1 SV=2	N-Term(TMT6plex); C3(Carbamidomethyl); T14(Phospho); [Y]16(Phospho)
	ATP5IF1	0.254908	-0.0117063	0.429581	-0.358445	1.10088																0.283044	1	ATPase inhibitor, mitochondrial OS=Homo sapiens OX=9606 GN=ATP5IF1 PE=1 SV=1	N-Term(TMT6plex); [Y]8(Phospho)
	FLNC	-0.36226	-0.157873	1.34477	0.718592	-0.135797																0.281487	1	Filamin-C OS=Homo sapiens OX=9606 GN=FLNC PE=1 SV=3	N-Term(TMT6plex); [Y]10(Phospho); K15(TMT6plex)
	ANXA2	0.813662	0.365985	0.731942	1.59789	0.484332	-0.757051	-2.11626	0.641981	1.40871	0.158444						0.272122	0.373372	-0.0655404	-0.323885	0.632707	0.281227	3	Annexin A2 OS=Homo sapiens OX=9606 GN=ANXA2 PE=1 SV=2	N-Term(TMT6plex); [Y]9(Phospho)
	SYK	0.00766055	-0.14347	1.52313	1.11498	1.46749											-0.318492	-1.33862	0.0856248	0.178138	0.228818	0.280527	2	Tyrosine-protein kinase SYK OS=Homo sapiens OX=9606 GN=SYK PE=1 SV=1	N-Term(TMT6plex); [Y]10(Phospho); K21(TMT6plex)
	SHC1	-1.0555	0.91517	0.762085	1.18987	1.71485	0.882696	0.173017	0.614399	0.998371	0.645032	0.879827	-0.40077	-2.17924	1.247	-0.546365	-0.939939	0.0964146	0.536736	0.371428	-0.302812	0.280113	4	SHC-transforming protein 1 OS=Homo sapiens OX=9606 GN=SHC1 PE=1 SV=4	N-Term(TMT6plex); [Y]8(Phospho); K16(TMT6plex)
	GAREM1																-0.131555	0.400122	0.842672	0.196854	0.0751502	0.276649	1	GRB2-associated and regulator of MAPK protein 1 OS=Homo sapiens OX=9606 GN=GAREM1 PE=1 SV=2	N-Term(TMT6plex); [Y]5(Phospho); K14(TMT6plex)
	KRT19											2.12382	0.180138	-1.33495	0.785092	-0.380798						0.27466	1	Keratin, type I cytoskeletal 19 OS=Homo sapiens OX=9606 GN=KRT19 PE=1 SV=4	N-Term(TMT6plex); [Y]10(Phospho); K17(TMT6plex)
	AXL	-0.163074	-0.451994	0.270802	0.963242	0.733753																0.270546	1	Tyrosine-protein kinase receptor UFO OS=Homo sapiens OX=9606 GN=AXL PE=1 SV=4	N-Term(TMT6plex); [Y]6(Phospho)
	TRPM4	0.373139	-0.615397	0.832829	1.54172	0.952379	0.451576	-0.737236	2.0284	0.633549	1.74978						-0.324315	-0.256602	-0.332699	-2.14859	-0.156913	0.266108	3	Transient receptor potential cation channel subfamily M member 4 OS=Homo sapiens OX=9606 GN=TRPM4 PE=1 SV=1	N-Term(TMT6plex); C2(Carbamidomethyl); [Y]10(Phospho)
	DSP	1.67672	0.401167	1.64058	0.777446	2.0967						2.29527	-0.0626001	-2.38364	0.312131	-0.178505	0.600804	0.0421067	-1.07826	-1.18172	-1.05884	0.259957	3	Desmoplakin OS=Homo sapiens OX=9606 GN=DSP PE=1 SV=3	N-Term(TMT6plex); [Y]12(Phospho); C13(Carbamidomethyl)
	CRK											0.029398	0.257385	0.391184	0.0668324	0.520501						0.25306	1	Adapter molecule crk OS=Homo sapiens OX=9606 GN=CRK PE=1 SV=2	N-Term(TMT6plex); [Y]6(Phospho)
	MYLK	0.983426	-0.841897	1.16862	-0.0989008	0.0345235																0.249154	1	Myosin light chain kinase, smooth muscle OS=Homo sapiens OX=9606 GN=MYLK PE=1 SV=4	N-Term(TMT6plex); [Y]8(Phospho); K11(TMT6plex)
	TXNRD1											-0.12595	-0.0422804	-0.0994201	0.125159	1.37417						0.246336	1	Thioredoxin reductase 1, cytoplasmic OS=Homo sapiens OX=9606 GN=TXNRD1 PE=1 SV=3	N-Term(TMT6plex); [Y]4(Phospho); K20(TMT6plex)
	NEDD9	0.54736	1.02764	1.52248	1.19197	2.63172	-2.11566	-2.03657	-1.98532	0.632836	-2.91847	1.11581	1.08642	0.610471	0.429297	0.678132	-0.556266	1.09951	-0.423921	0.559589	1.77279	0.243491	4	Enhancer of filamentation 1 OS=Homo sapiens OX=9606 GN=NEDD9 PE=1 SV=1	N-Term(TMT6plex); [Y]4(Phospho); K15(TMT6plex)
	PTK2	-0.00335819	-1.12552	1.56914	0.249518	1.94629						-0.532396	0.655249	-0.87389	0.343479	0.1905						0.241901	2	Focal adhesion kinase 1 OS=Homo sapiens OX=9606 GN=PTK2 PE=1 SV=2	N-Term(TMT6plex); [Y]8(Phospho); K9(TMT6plex)
	FLNA	0.0198489	0.565087	0.941121	0.59924	0.884325						-1.20743	-0.121854	-0.0531073	0.494734	0.230615						0.235258	2	Filamin-A OS=Homo sapiens OX=9606 GN=FLNA PE=1 SV=4	N-Term(TMT6plex); C14(Carbamidomethyl); [Y]15(Phospho)
	FLNA	-0.954348	-0.74739	0.701196	1.01051	1.32497	2.03713	0.983082	2.10553	1.20387	0.774802	-2.58589	-1.23178	-0.138648	-0.437652	-0.538249						0.233808	3	Filamin-A OS=Homo sapiens OX=9606 GN=FLNA PE=1 SV=4	N-Term(TMT6plex); [Y]12(Phospho)
	GAB1	0.218697	-0.788591	0.848794	0.921949	1.31714	0.0510528	-0.552534	0.568962	1.55919	1.40662	-0.675265	-0.760586	0.213985	1.23019	-0.63283	-2.16428	-0.400814	1.60828	-0.185375	0.858106	0.232135	4	GRB2-associated-binding protein 1 OS=Homo sapiens OX=9606 GN=GAB1 PE=1 SV=2	N-Term(TMT6plex); [Y]3(Phospho); K10(TMT6plex)
	NCK1	-0.0973106	-1.13413	1.03895	1.09955	2.00911											-0.914485	0.244721	0.187449	-0.0219923	-0.0995286	0.231233	2	Cytoplasmic protein NCK1 OS=Homo sapiens OX=9606 GN=NCK1 PE=1 SV=1	N-Term(TMT6plex); [Y]2(Phospho); K11(TMT6plex)
	ANXA5	-0.996342	-0.802638	1.12404	0.567858	-0.129279	0.858587	0.16545	1.29181	2.09678	1.40006	-1.39616	-0.110812	1.19131	0.296025	0.0564231	0.478467	-1.54518	0.050509	0.329664	-0.340813	0.229288	4	Annexin A5 OS=Homo sapiens OX=9606 GN=ANXA5 PE=1 SV=2	N-Term(TMT6plex); [Y]5(Phospho); K8(TMT6plex)
	SLC26A3	-0.112928	-1.76946	-1.2548	1.24929	1.20266	0.793359	1.62568	1.60082	5.66143	1.48114	1.42896	1.0573	-2.26459	-0.0390907	-2.35518	-0.840032	1.79242	-1.7874	-0.71682	-2.20333	0.227471	4	Chloride anion exchanger OS=Homo sapiens OX=9606 GN=SLC26A3 PE=1 SV=1	N-Term(TMT6plex); [Y]4(Phospho); K11(TMT6plex)
	SYP	2.03713	0.983082	2.10553	1.20387	0.774802	-0.594245	-0.444171	-0.523121	0.384508	-0.821737	-0.313493	-0.187424	1.24015	1.46602	0.00108492	-0.77432	-0.376252	-2.00238	-0.6011	0.986859	0.22724	4	Synaptophysin OS=Homo sapiens OX=9606 GN=SYP PE=1 SV=3	N-Term(TMT6plex); [Y]5(Phospho); C11(Carbamidomethyl)
	PRPF4B																0.768388	0.273463	-1.37519	0.84821	0.61903	0.226781	1	Serine/threonine-protein kinase PRP4 homolog OS=Homo sapiens OX=9606 GN=PRPF4B PE=1 SV=3	N-Term(TMT6plex); C2(Carbamidomethyl); S8(Phospho); [Y]18(Phospho)
	PPIB																0.693539	-0.431803	-0.0529175	0.0702292	0.814046	0.218619	1	Peptidyl-prolyl cis-trans isomerase B OS=Homo sapiens OX=9606 GN=PPIB PE=1 SV=2	N-Term(TMT6plex); [Y]2(Phospho)
	MAPK1											-0.259937	-0.0161437	-0.395355	1.04148	0.722605						0.218531	1	Mitogen-activated protein kinase 1 OS=Homo sapiens OX=9606 GN=MAPK1 PE=1 SV=3	N-Term(TMT6plex); T9(Phospho); T13(Phospho); [Y]15(Phospho)
	EPHA4																-0.565072	-0.723053	-0.221313	0.0570655	2.51756	0.213038	1	Ephrin type-A receptor 4 OS=Homo sapiens OX=9606 GN=EPHA4 PE=1 SV=1	N-Term(TMT6plex); [Y]8(Phospho)
	SRC	-0.0565137	-0.488194	1.25757	0.397042	1.96308						0.0244818	-0.17855	-1.28262	1.7983	-0.165733	0.0776746	0.259711	-1.80335	0.180211	1.14552	0.208576	3	Proto-oncogene tyrosine-protein kinase Src OS=Homo sapiens OX=9606 GN=SRC PE=1 SV=3	N-Term(TMT6plex); K1(TMT6plex); [Y]27(Phospho)
	HBA1	0.655403	1.13452	0.365417	0.313115	0.630644	0.138161	-0.453402	1.3987	1.19762	2.40847	1.06097	-0.268314	-0.993575	0.561919	0.341068	-0.565349	0.724146	-2.2983	-0.836128	-1.37342	0.207083	4	Hemoglobin subunit alpha OS=Homo sapiens OX=9606 GN=HBA1 PE=1 SV=2	N-Term(TMT6plex); [Y]8(Phospho)
	DDR1																0.109976	0.953028	-1.5383	0.371756	1.08576	0.196443	1	Epithelial discoidin domain-containing receptor 1 OS=Homo sapiens OX=9606 GN=DDR1 PE=1 SV=1	N-Term(TMT6plex); [Y]3(Phospho); [Y]8(Phospho)
	STAT6											0.572361	-0.46489	1.09751	-0.689364	0.442667						0.191657	1	Signal transducer and activator of transcription 6 OS=Homo sapiens OX=9606 GN=STAT6 PE=1 SV=1	N-Term(TMT6plex); [Y]2(Phospho); K8(TMT6plex)
	PIK3R2																-0.0550366	0.0979101	-0.636696	0.994543	0.545224	0.189189	1	Phosphatidylinositol 3-kinase regulatory subunit beta OS=Homo sapiens OX=9606 GN=PIK3R2 PE=1 SV=2	N-Term(TMT6plex); [Y]4(Phospho)
	PLCG1	0.801462	0.383269	1.43628	1.11156	1.68976	-0.686238	0.417312	0.312825	-0.108953	-0.227028						0.281904	-0.858885	-1.08825	0.00251488	-0.630077	0.189164	3	1-phosphatidylinositol 4,5-bisphosphate phosphodiesterase gamma-1 OS=Homo sapiens OX=9606 GN=PLCG1 PE=1 SV=1	N-Term(TMT6plex); [Y]1(Phospho)
	PTPN11	-0.276444	-0.916791	0.80391	0.685433	1.43781	1.67718	1.20511	1.61723	2.40437	2.80538	0.10209	-1.44295	-1.71581	-0.0610335	-0.302028	-0.40622	-2.07642	0.1106	-0.595893	-1.29434	0.18806	4	Tyrosine-protein phosphatase non-receptor type 11 OS=Homo sapiens OX=9606 GN=PTPN11 PE=1 SV=2	N-Term(TMT6plex); [Y]2(Phospho); K12(TMT6plex)
	FLNA	0.912422	0.893666	1.12119	1.58025	1.26065											-0.0359807	-1.12627	-1.70395	-0.315702	-0.741502	0.184477	2	Filamin-A OS=Homo sapiens OX=9606 GN=FLNA PE=1 SV=4	N-Term(TMT6plex); [Y]4(Phospho)
	FYB1											-0.56037	0.468055	0.540885	-0.110873	0.577277						0.182995	1	FYN-binding protein 1 OS=Homo sapiens OX=9606 GN=FYB1 PE=1 SV=2	N-Term(TMT6plex); C18(Carbamidomethyl); [Y]20(Phospho)
	KIAA1217											-0.483093	1.01796	-0.0915076	0.56074	-0.0963031						0.181559	1	Sickle tail protein homolog OS=Homo sapiens OX=9606 GN=KIAA1217 PE=1 SV=2	N-Term(TMT6plex); [Y]3(Phospho)
	GAB1						1.26973	0.180936	0.938704	0.948819	0.764802						-1.06395	-1.26748	1.24026	0.401196	-1.59904	0.181397	2	GRB2-associated-binding protein 1 OS=Homo sapiens OX=9606 GN=GAB1 PE=1 SV=2	N-Term(TMT6plex); C7(Carbamidomethyl); [Y]8(Phospho)
	TAGLN3	0.650603	-0.548213	0.067119	0.347001	0.357948																0.174892	1	Transgelin-3 OS=Homo sapiens OX=9606 GN=TAGLN3 PE=1 SV=2; Transgelin-2 OS=Homo sapiens OX=9606 GN=TAGLN2 PE=1 SV=3	N-Term(TMT6plex); [Y]10(Phospho)
	NIPSNAP1																-0.000268541	0.765676	-0.476447	0.258389	0.317207	0.172911	1	Protein NipSnap homolog 1 OS=Homo sapiens OX=9606 GN=NIPSNAP1 PE=1 SV=1	N-Term(TMT6plex); [Y]7(Phospho)
	PRKCA	-0.689128	-1.18174	0.244	2.10692	0.370005																0.170012	1	Protein kinase C alpha type OS=Homo sapiens OX=9606 GN=PRKCA PE=1 SV=4; Protein kinase C gamma type OS=Homo sapiens OX=9606 GN=PRKCG PE=1 SV=3	N-Term(TMT6plex); [Y]14(Phospho); K16(TMT6plex)
	CAV1	0.0279512	-2.11794	1.97189	0.000607483	0.957046																0.16791	1	Caveolin-1 OS=Homo sapiens OX=9606 GN=CAV1 PE=1 SV=4	N-Term(TMT6plex); [Y]3(Phospho); K8(TMT6plex)
	ITSN2	0.0510528	-0.552534	0.568962	1.55919	1.40662	-1.20358	-0.40864	0.596712	-0.206908	0.520911						0.376809	0.390489	0.332659	-1.07349	0.148775	0.167136	3	Intersectin-2 OS=Homo sapiens OX=9606 GN=ITSN2 PE=1 SV=3	N-Term(TMT6plex); [Y]3(Phospho); K8(TMT6plex)
	ANXA2P2	-0.690349	-0.0428866	0.139105	0.373332	0.118368	-0.245463	0.0989052	-0.10053	2.96026	0.0289619	1.38567	-1.2467	-0.370929	0.15569	0.280537	-0.186401	-0.278508	0.124283	0.105428	0.464249	0.153651	4	Putative annexin A2-like protein OS=Homo sapiens OX=9606 GN=ANXA2P2 PE=5 SV=2; Annexin A2 OS=Homo sapiens OX=9606 GN=ANXA2 PE=1 SV=2	N-Term(TMT6plex); [Y]14(Phospho); K18(TMT6plex)
	PEAR1											0.230276	-0.484282	0.280293	0.620658	0.103609						0.150111	1	Platelet endothelial aggregation receptor 1 OS=Homo sapiens OX=9606 GN=PEAR1 PE=1 SV=1	N-Term(TMT6plex); [Y]21(Phospho)
	HCK						0.286122	-1.25056	1.25042	1.0384	2.16397						-0.24449	0.0751718	-0.0537473	-0.805416	-0.960619	0.149924	2	Tyrosine-protein kinase HCK OS=Homo sapiens OX=9606 GN=HCK PE=1 SV=5	N-Term(TMT6plex); [Y]8(Phospho)
	VCL	-0.125822	-0.104214	1.98493	0.650398	1.51495	-0.36226	-0.157873	1.34477	0.718592	-0.135797	-1.10538	-0.0773729	0.518817	0.401135	-0.41366	-0.190445	-0.6509	-1.1678	0.202442	0.122094	0.148331	4	Vinculin OS=Homo sapiens OX=9606 GN=VCL PE=1 SV=4	N-Term(TMT6plex); [Y]2(Phospho)
	SPTAN1											-0.0727984	-0.472393	-0.466316	0.618086	1.13408						0.148131	1	Spectrin alpha chain, non-erythrocytic 1 OS=Homo sapiens OX=9606 GN=SPTAN1 PE=1 SV=3	N-Term(TMT6plex); [Y]24(Phospho)
	EPB41L2	0.544469	0.956014	0.530074	1.52974	1.59611	-1.63999	-1.47099	-0.67148	-0.118291	-0.743049	1.7169	0.257526	0.732657	0.229314	0.87071	-0.763782	0.575162	-0.701239	-0.510081	0.0308681	0.147532	4	Band 4.1-like protein 2 OS=Homo sapiens OX=9606 GN=EPB41L2 PE=1 SV=1	N-Term(TMT6plex); [Y]7(Phospho)
	CSK	0.324565	-0.135757	0.649394	0.186872	-0.355896																0.133836	1	Tyrosine-protein kinase CSK OS=Homo sapiens OX=9606 GN=CSK PE=1 SV=1	N-Term(TMT6plex); [Y]6(Phospho)
	TTYH2	0.629659	0.0382211	1.12851	1.34864	0.986508											-0.415011	-1.04701	-0.369148	-0.868075	-0.168352	0.126394	2	Protein tweety homolog 2 OS=Homo sapiens OX=9606 GN=TTYH2 PE=1 SV=3	N-Term(TMT6plex); [Y]1(Phospho)
	SVIL	-0.103254	-0.415273	1.15258	0.103178	-0.106485																0.126149	1	Supervillin OS=Homo sapiens OX=9606 GN=SVIL PE=1 SV=2	N-Term(TMT6plex); [Y]5(Phospho); K14(TMT6plex)
	NPEPL1	-0.660778	-1.02316	0.223603	1.87162	0.216333																0.125525	1	Probable aminopeptidase NPEPL1 OS=Homo sapiens OX=9606 GN=NPEPL1 PE=1 SV=3	N-Term(TMT6plex); [Y]6(Phospho); K10(TMT6plex)
	PKP4																0.0398028	0.303763	-1.13986	0.521442	0.884278	0.121884	1	Plakophilin-4 OS=Homo sapiens OX=9606 GN=PKP4 PE=1 SV=2	N-Term(TMT6plex); [Y]16(Phospho)
	CAV1	-0.25086	-1.21598	1.237	1.47294	1.09898	-0.347583	-0.327179	1.33337	1.17944	2.33204	-1.4223	-1.24975	0.4648	-0.5819	-0.763241	-0.334838	-1.24626	0.346227	0.529302	0.162153	0.120818	4	Caveolin-1 OS=Homo sapiens OX=9606 GN=CAV1 PE=1 SV=4	N-Term(TMT6plex); [Y]9(Phospho)
	MYH11	0.538339	0.178288	1.85094	0.929648	1.26434						0.0155096	-0.200844	0.355278	0.360522	-0.0390156	-0.514172	-0.55967	-1.80968	-1.01822	0.450275	0.120103	3	Myosin-11 OS=Homo sapiens OX=9606 GN=MYH11 PE=1 SV=3	N-Term(TMT6plex); [Y]5(Phospho)
	PTK2	0.803846	-0.128859	1.11966	0.730668	1.17914						-0.614899	0.772539	-0.900459	0.410139	0.178038	0.271197	-2.3545	0.31565	-0.197174	0.139301	0.114953	3	Focal adhesion kinase 1 OS=Homo sapiens OX=9606 GN=PTK2 PE=1 SV=2	N-Term(TMT6plex); [Y]7(Phospho); K9(TMT6plex)
	WDR1	-0.227576	-0.157286	-0.618108	1.87183	-0.266886	1.43556	0.522259	0.973721	2.19272	1.58213	-3.06785	-1.05047	-0.433669	-0.209927	-0.822311						0.114943	3	WD repeat-containing protein 1 OS=Homo sapiens OX=9606 GN=WDR1 PE=1 SV=4	N-Term(TMT6plex); [Y]7(Phospho); K16(TMT6plex)
	DPYSL2																-0.561247	0.650157	-0.632097	0.109781	1.00632	0.114584	1	Dihydropyrimidinase-related protein 2 OS=Homo sapiens OX=9606 GN=DPYSL2 PE=1 SV=1	N-Term(TMT6plex); [Y]8(Phospho); C16(Carbamidomethyl)
	AKAP12	-0.413657	-1.70133	0.85541	1.39124	0.402866																0.106906	1	A-kinase anchor protein 12 OS=Homo sapiens OX=9606 GN=AKAP12 PE=1 SV=4	N-Term(TMT6plex); [Y]5(Phospho); K7(TMT6plex)
	TNS1	-0.276577	-0.933186	1.05165	-0.520173	0.399718	1.81365	1.01439	1.44911	2.27657	1.96374	-1.21214	-0.492621	-0.74256	1.35418	-0.442676	-0.225144	-1.8799	-2.04093	0.353354	-0.791551	0.105945	4	Tensin-1 OS=Homo sapiens OX=9606 GN=TNS1 PE=1 SV=2	N-Term(TMT6plex); [Y]20(Phospho); K22(TMT6plex)
	CARTPT	0.491784	-0.759895	-1.09937	1.48698	0.403377																0.104575	1	Cocaine- and amphetamine-regulated transcript protein OS=Homo sapiens OX=9606 GN=CARTPT PE=1 SV=1	N-Term(TMT6plex); [Y]1(Phospho); C7(Carbamidomethyl); C13(Carbamidomethyl)
	LPP	-0.800095	-0.0351207	1.338	-0.0629683	0.773654	-0.660778	-1.02316	0.223603	1.87162	0.216333	0.0127875	-0.0904602	0.440081	-0.394211	-0.28142						0.101859	3	Lipoma-preferred partner OS=Homo sapiens OX=9606 GN=LPP PE=1 SV=1	N-Term(TMT6plex); [Y]7(Phospho); K17(TMT6plex)
	NDUFB4	-0.659914	-0.584713	1.26627	1.8336	1.42836											-0.513722	-0.94074	-0.492639	-0.473694	0.135888	0.099869	2	NADH dehydrogenase [ubiquinone] 1 beta subcomplex subunit 4 OS=Homo sapiens OX=9606 GN=NDUFB4 PE=1 SV=3	N-Term(TMT6plex); [Y]6(Phospho)
	PRKAA1																0.940923	-0.676705	-0.393114	0.114412	0.508625	0.0988283	1	5-AMP-activated protein kinase catalytic subunit alpha-1 OS=Homo sapiens OX=9606 GN=PRKAA1 PE=1 SV=4	N-Term(TMT6plex); [Y]6(Phospho)
	PDHA1																0.178354	1.09996	-1.97663	-0.00509844	1.18654	0.096625	1	Pyruvate dehydrogenase E1 component subunit alpha, somatic form, mitochondrial OS=Homo sapiens OX=9606 GN=PDHA1 PE=1 SV=3; Pyruvate dehydrogenase E1 component subunit alpha, testis-specific form, mitochondrial OS=Homo sapiens OX=9606 GN=PDHA2 PE=1 SV=1	N-Term(TMT6plex); S12(Phospho); [Y]13(Phospho)
	NAXD						2.76272	1.87753	2.3943	2.9967	3.21056	-3.25846	-1.49756	-0.0412198	-3.22476	-4.26028						0.0959525	2	ATP-dependent (S)-NAD(P)H-hydrate dehydratase OS=Homo sapiens OX=9606 GN=NAXD PE=1 SV=1	N-Term(TMT6plex); C7(Carbamidomethyl); [Y]10(Phospho); K23(TMT6plex)
	GCHFR	0.902176	1.20274	0.122421	2.18968	0.569304	-2.25076	-2.32789	0.829765	-1.09209	0.0482796						0.213876	0.508382	-0.559868	0.193358	0.872628	0.0948007	3	GTP cyclohydrolase 1 feedback regulatory protein OS=Homo sapiens OX=9606 GN=GCHFR PE=1 SV=3	N-Term(TMT6plex); [Y]7(Phospho)
	SHC1	0.168624	0.217556	0.0767991	-0.60364	0.610365																0.0939409	1	SHC-transforming protein 1 OS=Homo sapiens OX=9606 GN=SHC1 PE=1 SV=4	N-Term(TMT6plex); [Y]21(Phospho); K28(TMT6plex)
	ST5											-0.645219	-1.32531	1.97222	-0.141189	0.60384						0.0928675	1	Suppression of tumorigenicity 5 protein OS=Homo sapiens OX=9606 GN=ST5 PE=1 SV=3	N-Term(TMT6plex); [Y]8(Phospho); K17(TMT6plex)
	ACTR3	0.679791	0.579259	0.956819	2.66209	1.10459	-1.4477	-0.921265	-0.946057	-1.3885	-1.8821						0.648213	-0.178994	0.553464	0.715256	0.233395	0.0912175	3	Actin-related protein 3 OS=Homo sapiens OX=9606 GN=ACTR3 PE=1 SV=3	N-Term(TMT6plex); C4(Carbamidomethyl); C8(Carbamidomethyl); [Y]12(Phospho); K14(TMT6plex)
	TNS1	-2.25076	-2.32789	0.829765	-1.09209	0.0482796	2.82049	2.44345	2.47043	4.46519	2.82149	-1.39546	-2.07891	-1.20295	-2.67411	-1.54204						0.0889923	3	Tensin-1 OS=Homo sapiens OX=9606 GN=TNS1 PE=1 SV=2	N-Term(TMT6plex); [Y]7(Phospho); K13(TMT6plex)
	TNS1	-0.0535534	-0.710503	0.572592	-0.0972173	-0.346097	3.29341	2.30615	1.83429	2.25514	2.44681	-1.7875	-1.27037	0.28961	-0.267942	-0.242213	-1.23091	-1.70658	-0.814466	-2.08951	-0.615391	0.0882869	4	Tensin-1 OS=Homo sapiens OX=9606 GN=TNS1 PE=1 SV=2	N-Term(TMT6plex); [Y]3(Phospho)
	TLN1	0.134136	-0.455114	1.77141	1.06154	0.502687						-0.132578	0.308224	-0.270201	1.47049	0.397314	-0.315781	-1.07326	-1.15384	-0.420072	-0.609965	0.0809989	3	Talin-1 OS=Homo sapiens OX=9606 GN=TLN1 PE=1 SV=3	N-Term(TMT6plex); [Y]19(Phospho)
	DYRK1A	-0.536502	0.226554	-0.0551039	1.71993	-0.611489						-0.0293183	0.71539	-0.32838	0.234801	-0.611526						0.0724355	2	Dual specificity tyrosine-phosphorylation-regulated kinase 1A OS=Homo sapiens OX=9606 GN=DYRK1A PE=1 SV=2	N-Term(TMT6plex); K1(TMT6plex); [Y]12(Phospho); K17(TMT6plex)
	APLP2	1.06887	0.506981	1.23137	2.49802	1.16138											-1.19533	-2.79931	-1.88417	0.229468	-0.100032	0.0717244	2	Amyloid-like protein 2 OS=Homo sapiens OX=9606 GN=APLP2 PE=1 SV=2	N-Term(TMT6plex); [Y]1(Phospho)
	PKP3						-0.50074	-0.263387	-0.950219	2.09306	0.225907						-0.0914102	1.25007	-1.48791	0.0888824	0.311798	0.0676054	2	Plakophilin-3 OS=Homo sapiens OX=9606 GN=PKP3 PE=1 SV=1	N-Term(TMT6plex); [Y]3(Phospho)
	CTNND1						0.445859	-0.828395	-0.225481	1.25788	-0.640547						-0.645816	0.739796	-1.32956	0.0834361	1.77313	0.0630303	2	Catenin delta-1 OS=Homo sapiens OX=9606 GN=CTNND1 PE=1 SV=1	N-Term(TMT6plex); [Y]7(Phospho)
	CTNNB1																-0.85273	1.64201	-2.23326	0.387025	1.34976	0.0585625	1	Catenin beta-1 OS=Homo sapiens OX=9606 GN=CTNNB1 PE=1 SV=1	N-Term(TMT6plex); [Y]6(Phospho)
	DOK1											0.924397	-0.541653	-0.361249	0.8618	0.963813	0.243284	-0.813289	0.528188	-0.387235	-0.894272	0.0523784	2	Docking protein 1 OS=Homo sapiens OX=9606 GN=DOK1 PE=1 SV=1	N-Term(TMT6plex); K2(TMT6plex); [Y]17(Phospho)
	EPHA2						-0.0386763	0.0278343	-0.986472	1.31724	-0.0843733											0.0471109	1	Ephrin type-A receptor 2 OS=Homo sapiens OX=9606 GN=EPHA2 PE=1 SV=2	N-Term(TMT6plex); [Y]10(Phospho); K16(TMT6plex)
	GAB1											-1.02289	-0.0996031	-0.271349	1.20634	0.279614	-0.318555	-0.600939	1.03173	-0.462219	0.691137	0.043327	2	GRB2-associated-binding protein 1 OS=Homo sapiens OX=9606 GN=GAB1 PE=1 SV=2	N-Term(TMT6plex); [Y]4(Phospho); K13(TMT6plex)
	DES	-0.818936	0.0541062	-0.0457949	-0.0795861	1.06943																0.0358443	1	Desmin OS=Homo sapiens OX=9606 GN=DES PE=1 SV=3	N-Term(TMT6plex); [Y]5(Phospho)
	CAVIN1	-0.660694	-0.668304	0.97462	-0.246482	0.771831																0.0341939	1	Caveolae-associated protein 1 OS=Homo sapiens OX=9606 GN=CAVIN1 PE=1 SV=1	N-Term(TMT6plex); K1(TMT6plex); [Y]10(Phospho)
	PTK2																-0.556862	1.04811	-1.73127	0.411859	0.986778	0.0317219	1	Focal adhesion kinase 1 OS=Homo sapiens OX=9606 GN=PTK2 PE=1 SV=2	N-Term(TMT6plex); S5(Phospho); [Y]12(Phospho)
	LPP	-1.20368	0.942809	0.801865	-0.139249	0.136908	1.21427	1.57308	1.89112	3.90311	1.27297	-0.495518	-0.772074	-0.469396	-1.01527	-0.730117	-0.675909	-1.34326	-1.19083	-1.91208	-1.21774	0.0285505	4	Lipoma-preferred partner OS=Homo sapiens OX=9606 GN=LPP PE=1 SV=1	N-Term(TMT6plex); [Y]6(Phospho)
	PGM5	0.135889	-0.587496	0.725922	-0.292444	0.150965																0.0265671	1	Phosphoglucomutase-like protein 5 OS=Homo sapiens OX=9606 GN=PGM5 PE=1 SV=2	N-Term(TMT6plex); [Y]4(Phospho)
	DLG1																-0.570601	1.22459	-1.77144	0.41301	0.834412	0.0259934	1	Disks large homolog 1 OS=Homo sapiens OX=9606 GN=DLG1 PE=1 SV=2	N-Term(TMT6plex); [Y]9(Phospho)
	TF											0.140465	-0.560872	-0.184319	0.243293	0.468065	0.382242	0.447623	0.186145	-0.00474689	-0.879114	0.023878	2	Serotransferrin OS=Homo sapiens OX=9606 GN=TF PE=1 SV=3	N-Term(TMT6plex); [Y]6(Phospho)
	PLCD3																-0.398481	-0.00496351	-0.570337	0.524326	0.5447	0.0190489	1	1-phosphatidylinositol 4,5-bisphosphate phosphodiesterase delta-3 OS=Homo sapiens OX=9606 GN=PLCD3 PE=1 SV=3	N-Term(TMT6plex); [Y]5(Phospho)
	ALDH7A1	-0.649274	-0.793744	0.361403	0.700411	0.395286																0.0028163	1	Alpha-aminoadipic semialdehyde dehydrogenase OS=Homo sapiens OX=9606 GN=ALDH7A1 PE=1 SV=5	N-Term(TMT6plex); [Y]7(Phospho); C8(Carbamidomethyl)
	LANCL1	0.445859	-0.828395	-0.225481	1.25788	-0.640547																0.00186361	1	LanC-like protein 1 OS=Homo sapiens OX=9606 GN=LANCL1 PE=1 SV=1	N-Term(TMT6plex); [Y]11(Phospho)
	POTEF	-0.237952	-0.168749	0.847203	0.519268	1.0233	1.77108	1.06125	2.58665	1.81827	1.79964	-2.0333	-0.951326	-0.37047	-0.292218	-0.954942	-0.416925	-2.08796	-1.61824	-1.47131	-1.15545	-0.0166079	4	POTE ankyrin domain family member F OS=Homo sapiens OX=9606 GN=POTEF PE=1 SV=2; Actin, gamma-enteric smooth muscle OS=Homo sapiens OX=9606 GN=ACTG2 PE=1 SV=1; Putative beta-actin-like protein 3 OS=Homo sapiens OX=9606 GN=POTEKP PE=5 SV=1; Actin, cytoplasmic 1 OS=Homo sapiens OX=9606 GN=ACTB PE=1 SV=1; POTE ankyrin domain family member E OS=Homo sapiens OX=9606 GN=POTEE PE=2 SV=3; Actin, aortic sm…	N-Term(TMT6plex); [Y]2(Phospho)
	MISP						1.12682	-0.0952668	1.82969	1.39437	1.20534	0.546978	-0.284126	-0.43103	-0.430865	0.191383	-1.18178	-0.317039	-2.40822	-0.272265	-1.18131	-0.0204879	3	Mitotic interactor and substrate of PLK1 OS=Homo sapiens OX=9606 GN=MISP PE=1 SV=1	N-Term(TMT6plex); [Y]8(Phospho)
	MAPK9	0.742306	0.476079	-0.0734058	0.737481	0.589534						-1.25483	-0.0907643	-0.704201	0.890052	1.12647	-0.337949	-0.766361	-1.59369	0.378069	-0.44816	-0.021958	3	Mitogen-activated protein kinase 9 OS=Homo sapiens OX=9606 GN=MAPK9 PE=1 SV=2	N-Term(TMT6plex); C3(Carbamidomethyl); T9(Phospho); [Y]11(Phospho)
	MAPK10	0.781911	0.535213	1.01133	0.66781	0.935482						-0.968029	0.0552908	-0.279255	0.634545	0.135986	-0.77574	-0.907483	-1.79205	-0.243686	-0.131713	-0.0226925	3	Mitogen-activated protein kinase 10 OS=Homo sapiens OX=9606 GN=MAPK10 PE=1 SV=2; Mitogen-activated protein kinase 8 OS=Homo sapiens OX=9606 GN=MAPK8 PE=1 SV=2	N-Term(TMT6plex); T9(Phospho); [Y]11(Phospho)
	SLC26A2	-0.285431	-0.536552	0.212117	-0.340454	-0.0244413						0.506967	0.54016	0.00551938	0.794357	0.729124	-0.530372	0.758791	-2.51614	0.55213	-0.220343	-0.023638	3	Sulfate transporter OS=Homo sapiens OX=9606 GN=SLC26A2 PE=1 SV=2	N-Term(TMT6plex); [Y]9(Phospho)
	BCAR1											0.290601	0.0484395	0.0961647	-0.855624	0.295298						-0.0250241	1	Breast cancer anti-estrogen resistance protein 1 OS=Homo sapiens OX=9606 GN=BCAR1 PE=1 SV=2	N-Term(TMT6plex); [Y]6(Phospho); K21(TMT6plex)
	CAVIN1	-0.913447	-0.106671	1.10816	-0.626913	0.835851	1.64421	0.674908	1.62245	0.813681	0.791521	-0.787316	-1.04904	-0.0593217	1.12865	-0.615984	-1.17511	-0.959786	-1.95473	-0.303799	-0.589748	-0.0261219	4	Caveolae-associated protein 1 OS=Homo sapiens OX=9606 GN=CAVIN1 PE=1 SV=1	N-Term(TMT6plex); [Y]9(Phospho)
	UBXN6	0.0126528	0.263257	1.20462	1.11751	0.731223											-0.486488	-0.755477	-1.29332	-0.747427	-0.309338	-0.0262787	2	UBX domain-containing protein 6 OS=Homo sapiens OX=9606 GN=UBXN6 PE=1 SV=1	N-Term(TMT6plex); [Y]3(Phospho)
	DOK2	-1.27192	0.0731005	0.375729	0.114971	0.592395	-1.0555	0.91517	0.762085	1.18987	1.71485	1.64849	-0.455629	-0.617292	-1.05828	0.387583	0.261386	-0.404956	-0.384765	-1.82558	-1.52928	-0.0283784	4	Docking protein 2 OS=Homo sapiens OX=9606 GN=DOK2 PE=1 SV=2	N-Term(TMT6plex); [Y]6(Phospho)
	POF1B						-1.53956	-0.831881	0.365593	-0.281996	-0.169323						1.09799	1.74691	-0.709923	-1.21438	1.14095	-0.0395613	2	Protein POF1B OS=Homo sapiens OX=9606 GN=POF1B PE=1 SV=3	N-Term(TMT6plex); [Y]4(Phospho)
	FRK						-0.546395	-0.442776	0.837536	-0.362203	0.313396											-0.0400884	1	Tyrosine-protein kinase FRK OS=Homo sapiens OX=9606 GN=FRK PE=1 SV=1	N-Term(TMT6plex); [Y]10(Phospho)
	GLUD1	0.882696	0.173017	0.614399	0.998371	0.645032											-1.42173	-0.00417951	-1.16612	-0.706345	-0.431372	-0.0416233	2	Glutamate dehydrogenase 1, mitochondrial OS=Homo sapiens OX=9606 GN=GLUD1 PE=1 SV=2	N-Term(TMT6plex); [Y]4(Phospho)
	SIGLEC5						-1.04836	-0.023544	0.233641	0.638975	-0.0155551											-0.0429693	1	Sialic acid-binding Ig-like lectin 5 OS=Homo sapiens OX=9606 GN=SIGLEC5 PE=1 SV=1	N-Term(TMT6plex); [Y]10(Phospho); K14(TMT6plex)
	LPP	0.0232056	0.0313056	-0.195576	0.442275	-0.520832																-0.0439243	1	Lipoma-preferred partner OS=Homo sapiens OX=9606 GN=LPP PE=1 SV=1	N-Term(TMT6plex); C1(Carbamidomethyl); C4(Carbamidomethyl); C16(Carbamidomethyl); [Y]17(Phospho); C25(Carbamidomethyl); K26(TMT6plex)
	PLEKHA6																-0.023989	-0.944545	-0.456974	-0.00732363	1.16206	-0.0541534	1	Pleckstrin homology domain-containing family A member 6 OS=Homo sapiens OX=9606 GN=PLEKHA6 PE=1 SV=4	N-Term(TMT6plex); [Y]9(Phospho)
	DLG1						-0.276577	-0.933186	1.05165	-0.520173	0.399718											-0.0557136	1	Disks large homolog 1 OS=Homo sapiens OX=9606 GN=DLG1 PE=1 SV=2	N-Term(TMT6plex); [Y]2(Phospho)
	MAPK11	0.600254	-1.69751	0.611007	-0.983696	0.0630027	0.0117571	-0.179631	0.321426	1.94028	0.195879	0.739574	0.0357926	-2.00286	0.138467	-0.630828						-0.0558061	3	Mitogen-activated protein kinase 11 OS=Homo sapiens OX=9606 GN=MAPK11 PE=1 SV=2	N-Term(TMT6plex); [Y]9(Phospho)
	EPHA4																-0.761729	-0.549107	-0.201718	-0.246121	1.44147	-0.0634418	1	Ephrin type-A receptor 4 OS=Homo sapiens OX=9606 GN=EPHA4 PE=1 SV=1	N-Term(TMT6plex); [Y]2(Phospho)
	PTK6						-0.0973106	-1.13413	1.03895	1.09955	2.00911	1.80914	1.34528	-2.81673	-1.00638	-0.947632	-1.3485	-0.682747	1.01633	-1.33195	0.0724231	-0.0649739	3	Protein-tyrosine kinase 6 OS=Homo sapiens OX=9606 GN=PTK6 PE=1 SV=1	N-Term(TMT6plex); K4(TMT6plex); [Y]9(Phospho)
	SYNM	-1.14173	0.026464	0.449795	-0.0443415	-0.316265	1.29769	1.18627	1.62952	1.50018	1.1039						-1.39207	-2.0692	-1.35076	-1.23514	-0.650564	-0.0670831	3	Synemin OS=Homo sapiens OX=9606 GN=SYNM PE=1 SV=2	N-Term(TMT6plex); [Y]6(Phospho)
	BAIAP2	-0.467163	-0.432403	0.243649	0.459044	-0.142318																-0.0678381	1	Brain-specific angiogenesis inhibitor 1-associated protein 2 OS=Homo sapiens OX=9606 GN=BAIAP2 PE=1 SV=1	N-Term(TMT6plex); [Y]18(Phospho)
	TNS3											0.2079	0.335667	-1.01575	-0.140709	0.267841						-0.0690109	1	Tensin-3 OS=Homo sapiens OX=9606 GN=TNS3 PE=1 SV=2	N-Term(TMT6plex); C4(Carbamidomethyl); [Y]17(Phospho); K19(TMT6plex)
	SORBS1	-1.33074	-0.911542	0.42744	-0.754129	-1.46672	1.29258	1.9657	2.14182	1.46677	1.33553	-0.837748	-1.47062	0.476586	-1.44816	-1.98624						-0.0732991	3	Sorbin and SH3 domain-containing protein 1 OS=Homo sapiens OX=9606 GN=SORBS1 PE=1 SV=3	N-Term(TMT6plex); [Y]3(Phospho); K9(TMT6plex)
	YWHAE	-0.112722	-0.755045	0.194542	0.370832	-0.0997005																-0.0804187	1	14-3-3 protein epsilon OS=Homo sapiens OX=9606 GN=YWHAE PE=1 SV=1	N-Term(TMT6plex); [Y]1(Phospho)
	PTK6	-0.840013	-1.27712	0.88768	0.976658	1.24176	0.650603	-0.548213	0.067119	0.347001	0.357948	0.916057	1.40521	-2.29245	-0.260417	-1.23803	-0.736596	0.00402455	-0.198534	-0.889342	-0.244516	-0.0835589	4	Protein-tyrosine kinase 6 OS=Homo sapiens OX=9606 GN=PTK6 PE=1 SV=1	N-Term(TMT6plex); [Y]7(Phospho)
	TLN1	0.372905	0.0870481	0.866164	0.122145	0.865233	0.887376	-2.15592	2.04401	-0.0124917	0.806591						-0.597143	-1.99314	-1.29953	0.0515226	-1.32952	-0.0856503	3	Talin-1 OS=Homo sapiens OX=9606 GN=TLN1 PE=1 SV=3	N-Term(TMT6plex); [Y]11(Phospho); C14(Carbamidomethyl)
	GAB1	-0.667024	-1.04204	-0.2524	-0.782252	0.417813	1.90086	0.964853	2.77244	2.38856	1.71421	-1.21617	-1.80537	-1.24828	0.555296	-0.699773	-1.44347	-1.12984	-0.407194	-1.25799	-0.527615	-0.08827	4	GRB2-associated-binding protein 1 OS=Homo sapiens OX=9606 GN=GAB1 PE=1 SV=2	N-Term(TMT6plex); [Y]15(Phospho); K22(TMT6plex)
	ALDH6A1	-0.33412	0.418444	0.169008	0.688371	1.11563											-0.827357	-0.429815	-0.389673	-1.42389	0.0332509	-0.0980158	2	Methylmalonate-semialdehyde dehydrogenase [acylating], mitochondrial OS=Homo sapiens OX=9606 GN=ALDH6A1 PE=1 SV=2	N-Term(TMT6plex); [Y]4(Phospho)
	ANXA2P2	-1.04836	-0.023544	0.233641	0.638975	-0.0155551	0.902176	1.20274	0.122421	2.18968	0.569304	0.726448	-1.21381	-1.55762	-1.25625	-0.218716	-0.543906	-0.619882	-0.206375	-1.49794	-0.668744	-0.114266	4	Putative annexin A2-like protein OS=Homo sapiens OX=9606 GN=ANXA2P2 PE=5 SV=2; Annexin A2 OS=Homo sapiens OX=9606 GN=ANXA2 PE=1 SV=2	N-Term(TMT6plex); [Y]2(Phospho)
	SORBS1											-0.735708	-0.313682	0.0954423	0.261367	0.11853						-0.11481	1	Sorbin and SH3 domain-containing protein 1 OS=Homo sapiens OX=9606 GN=SORBS1 PE=1 SV=3	N-Term(TMT6plex); [Y]5(Phospho)
	ACTG2																-1.12679	0.860582	-1.99664	0.467817	1.20259	-0.118488	1	Actin, gamma-enteric smooth muscle OS=Homo sapiens OX=9606 GN=ACTG2 PE=1 SV=1; Actin, aortic smooth muscle OS=Homo sapiens OX=9606 GN=ACTA2 PE=1 SV=1	N-Term(TMT6plex); [Y]7(Phospho)
	ACTG2	-0.651876	-1.28708	0.849581	0.103337	-0.0203694	0.0232056	0.0313056	-0.195576	0.442275	-0.520832											-0.122603	2	Actin, gamma-enteric smooth muscle OS=Homo sapiens OX=9606 GN=ACTG2 PE=1 SV=1; Actin, cytoplasmic 1 OS=Homo sapiens OX=9606 GN=ACTB PE=1 SV=1; Actin, aortic smooth muscle OS=Homo sapiens OX=9606 GN=ACTA2 PE=1 SV=1; Actin, alpha skeletal muscle OS=Homo sapiens OX=9606 GN=ACTA1 PE=1 SV=1; Actin, alpha cardiac muscle 1 OS=Homo sapiens OX=9606 GN=ACTC1 PE=1 SV=1; Actin, cytoplasmic 2 OS=Homo sapiens …	N-Term(TMT6plex); [Y]3(Phospho); K11(TMT6plex)
	SRCIN1																-0.0097017	-0.739481	-0.956421	-0.405787	1.49539	-0.1232	1	SRC kinase signaling inhibitor 1 OS=Homo sapiens OX=9606 GN=SRCIN1 PE=1 SV=4	N-Term(TMT6plex); [Y]5(Phospho)
	EPHA7	-1.02484	-1.45273	0.82461	1.14238	-0.130384																-0.128194	1	Ephrin type-A receptor 7 OS=Homo sapiens OX=9606 GN=EPHA7 PE=1 SV=3	N-Term(TMT6plex); [Y]10(Phospho); K16(TMT6plex)
	PGM5	-1.10618	-0.571605	1.75966	0.225279	0.0822787	0.912422	0.893666	1.12119	1.58025	1.26065	-2.16048	-0.472466	0.48719	0.179155	-0.898904	-1.36363	-2.14629	-0.991055	-1.08526	-0.307317	-0.130073	4	Phosphoglucomutase-like protein 5 OS=Homo sapiens OX=9606 GN=PGM5 PE=1 SV=2	N-Term(TMT6plex); [Y]4(Phospho)
	GSK3A	0.481234	0.206932	1.72206	-0.273937	1.35472											-0.904558	-1.44583	-1.43175	-0.480536	-0.550049	-0.132172	2	Glycogen synthase kinase-3 alpha OS=Homo sapiens OX=9606 GN=GSK3A PE=1 SV=2; Glycogen synthase kinase-3 beta OS=Homo sapiens OX=9606 GN=GSK3B PE=1 SV=2	N-Term(TMT6plex); [Y]7(Phospho); C9(Carbamidomethyl); S10(Phospho)
	PARD3B																-0.292333	0.0795344	-1.35585	0.203038	0.700488	-0.133024	1	Partitioning defective 3 homolog B OS=Homo sapiens OX=9606 GN=PARD3B PE=1 SV=2	N-Term(TMT6plex); [Y]16(Phospho); K18(TMT6plex)
	EPHX1																-0.355462	-0.519793	-0.276236	0.244814	0.197227	-0.14189	1	Epoxide hydrolase 1 OS=Homo sapiens OX=9606 GN=EPHX1 PE=1 SV=1	N-Term(TMT6plex); [Y]1(Phospho)
	MAPK3	-0.261916	-0.792186	0.408074	-0.595605	0.208982	1.26915	0.370105	1.88028	1.48183	1.61118	-0.282333	0.0884238	-2.39995	0.546555	-0.736839	-0.847447	-0.344875	-2.24785	-1.61538	-0.603706	-0.143175	4	Mitogen-activated protein kinase 3 OS=Homo sapiens OX=9606 GN=MAPK3 PE=1 SV=4	N-Term(TMT6plex); [Y]15(Phospho)
	LANCL2	-0.310221	-0.253547	0.470901	0.113386	-0.790199																-0.153936	1	LanC-like protein 2 OS=Homo sapiens OX=9606 GN=LANCL2 PE=1 SV=1	N-Term(TMT6plex); C4(Carbamidomethyl); [Y]15(Phospho)
	CAV1											-0.35445	0.174964	0.332802	0.236495	-0.199437	-0.957703	-0.678488	-0.319269	0.113784	0.0781119	-0.157319	2	Caveolin-1 OS=Homo sapiens OX=9606 GN=CAV1 PE=1 SV=4	N-Term(TMT6plex); [Y]1(Phospho)
	LPP	0.147598	-0.516496	0.534599	0.826283	0.212419	-0.0617869	-1.01637	0.199245	-0.709698	0.308299	-1.01492	-0.231945	-0.645238	-0.0801898	-0.373976						-0.161479	3	Lipoma-preferred partner OS=Homo sapiens OX=9606 GN=LPP PE=1 SV=1	N-Term(TMT6plex); [Y]5(Phospho)
	TNK2	-0.0369318	-1.81837	1.04475	-0.11492	0.86329						0.115069	-0.249507	-0.550653	-0.494194	-0.377974						-0.161944	2	Activated CDC42 kinase 1 OS=Homo sapiens OX=9606 GN=TNK2 PE=1 SV=3	N-Term(TMT6plex); K1(TMT6plex); [Y]4(Phospho); K19(TMT6plex)
	PTPN11	-1.2165	-1.05278	0.976781	-0.416065	2.20968	-0.841908	-0.521618	0.56259	-0.230302	-0.194023	-1.76382	-1.25812	0.158566	0.0430261	-0.733356	0.415607	-0.788798	-0.043508	1.30417	0.0955692	-0.16474	4	Tyrosine-protein phosphatase non-receptor type 11 OS=Homo sapiens OX=9606 GN=PTPN11 PE=1 SV=2	N-Term(TMT6plex); [Y]7(Phospho); K15(TMT6plex)
	PREP	-0.21389	-0.879961	-0.199191	-0.081823	0.522834																-0.170406	1	Prolyl endopeptidase OS=Homo sapiens OX=9606 GN=PREP PE=1 SV=2	N-Term(TMT6plex); [Y]5(Phospho); K9(TMT6plex)
	VTA1						-0.21389	-0.879961	-0.199191	-0.081823	0.522834											-0.170406	1	Vacuolar protein sorting-associated protein VTA1 homolog OS=Homo sapiens OX=9606 GN=VTA1 PE=1 SV=1	N-Term(TMT6plex); [Y]1(Phospho); K20(TMT6plex)
	NPEPPSL1	-0.399973	-1.04762	0.761741	0.960867	0.492256						-1.64076	-0.107316	0.436394	0.05673	-0.423532	-0.643056	-0.628383	-0.671501	-0.043086	0.339213	-0.170536	3	Puromycin-sensitive aminopeptidase-like protein OS=Homo sapiens OX=9606 GN=NPEPPSL1 PE=2 SV=3; Puromycin-sensitive aminopeptidase OS=Homo sapiens OX=9606 GN=NPEPPS PE=1 SV=2	N-Term(TMT6plex); [Y]1(Phospho)
	DPYSL3																-0.567577	-0.287527	-0.316006	-0.0758856	0.366704	-0.176058	1	Dihydropyrimidinase-related protein 3 OS=Homo sapiens OX=9606 GN=DPYSL3 PE=1 SV=1	N-Term(TMT6plex); [Y]8(Phospho)
	WASL						-0.690349	-0.0428866	0.139105	0.373332	0.118368	-0.598267	0.134242	-1.57243	0.277969	0.0414743						-0.181944	2	Neural Wiskott-Aldrich syndrome protein OS=Homo sapiens OX=9606 GN=WASL PE=1 SV=2	N-Term(TMT6plex); [Y]3(Phospho); K8(TMT6plex)
	SYNM	-1.53009	-1.5492	-0.455374	-1.51264	-0.837824	1.05395	0.486381	1.66235	1.30799	2.18544	-1.50563	-1.03132	0.346361	-0.491482	-0.894785						-0.184392	3	Synemin OS=Homo sapiens OX=9606 GN=SYNM PE=1 SV=2	N-Term(TMT6plex); [Y]5(Phospho)
	GAB2																-0.458694	-0.077949	-0.391117	-0.162774	0.168042	-0.184498	1	GRB2-associated-binding protein 2 OS=Homo sapiens OX=9606 GN=GAB2 PE=1 SV=1	N-Term(TMT6plex); [Y]4(Phospho)
	SCARF2						-0.396855	-0.353431	0.733888	-0.725422	-0.201433											-0.188651	1	Scavenger receptor class F member 2 OS=Homo sapiens OX=9606 GN=SCARF2 PE=1 SV=4	N-Term(TMT6plex); [Y]13(Phospho)
	GSS	1.0255	-0.845694	-0.122333	-0.705782	-0.37308																-0.204277	1	Glutathione synthetase OS=Homo sapiens OX=9606 GN=GSS PE=1 SV=1	N-Term(TMT6plex); [Y]3(Phospho)
	PDHA1																-0.814605	1.50909	-2.30861	-0.113954	0.689692	-0.207679	1	Pyruvate dehydrogenase E1 component subunit alpha, somatic form, mitochondrial OS=Homo sapiens OX=9606 GN=PDHA1 PE=1 SV=3; Pyruvate dehydrogenase E1 component subunit alpha, testis-specific form, mitochondrial OS=Homo sapiens OX=9606 GN=PDHA2 PE=1 SV=1	N-Term(TMT6plex); S12(Phospho); [Y]13(Phospho)
	JAK2																-0.279488	-0.608349	-0.560705	-0.526544	0.881626	-0.218692	1	Tyrosine-protein kinase JAK2 OS=Homo sapiens OX=9606 GN=JAK2 PE=1 SV=2	N-Term(TMT6plex); [Y]6(Phospho); K17(TMT6plex)
	CTTN	-0.744026	-0.514063	-0.181569	0.787843	0.87976	-0.649274	-0.793744	0.361403	0.700411	0.395286	-0.10019	-0.052353	-1.49848	0.575008	-0.319392	-0.585359	0.269505	-0.977889	-1.39822	-0.589634	-0.221749	4	Src substrate cortactin OS=Homo sapiens OX=9606 GN=CTTN PE=1 SV=2	N-Term(TMT6plex); [Y]15(Phospho); K17(TMT6plex)
	PFKM	-0.757051	-2.11626	0.641981	1.40871	0.158444	0.535631	1.6152	0.529282	2.94807	1.59305	-1.82832	-0.29075	0.381728	-1.57976	-2.16314	-0.506696	-2.11578	-0.87824	-1.54258	-0.533679	-0.225007	4	ATP-dependent 6-phosphofructokinase, muscle type OS=Homo sapiens OX=9606 GN=PFKM PE=1 SV=2	N-Term(TMT6plex); [Y]3(Phospho); K7(TMT6plex)
	PLEKHA7																-0.519014	0.848154	-1.53067	-0.608212	0.659677	-0.230013	1	Pleckstrin homology domain-containing family A member 7 OS=Homo sapiens OX=9606 GN=PLEKHA7 PE=1 SV=2	N-Term(TMT6plex); [Y]1(Phospho)
	SLC4A1																0.324187	0.661615	-0.870983	-0.447664	-0.848419	-0.236253	1	Band 3 anion transport protein OS=Homo sapiens OX=9606 GN=SLC4A1 PE=1 SV=3	N-Term(TMT6plex); [Y]12(Phospho)
	DES	-0.841908	-0.521618	0.56259	-0.230302	-0.194023																-0.245052	1	Desmin OS=Homo sapiens OX=9606 GN=DES PE=1 SV=3	N-Term(TMT6plex); [Y]4(Phospho); K7(TMT6plex)
	PIK3R1	1.33086	1.21385	1.40625	1.36532	1.36818	-3.00658	-2.71873	-1.6394	-2.39745	-2.1485						-0.0660789	0.721381	0.206014	0.63796	0.0214505	-0.247032	3	Phosphatidylinositol 3-kinase regulatory subunit alpha OS=Homo sapiens OX=9606 GN=PIK3R1 PE=1 SV=2	N-Term(TMT6plex); [Y]4(Phospho); K11(TMT6plex)
	IGF1R																-0.22566	-0.142411	-0.383981	-0.247905	-0.291932	-0.258378	1	Insulin-like growth factor 1 receptor OS=Homo sapiens OX=9606 GN=IGF1R PE=1 SV=1; Insulin receptor OS=Homo sapiens OX=9606 GN=INSR PE=1 SV=4	N-Term(TMT6plex); [Y]8(Phospho)
	NAXD	-1.63311	-0.134545	-0.0299109	0.768625	-0.263065																-0.258402	1	ATP-dependent (S)-NAD(P)H-hydrate dehydratase OS=Homo sapiens OX=9606 GN=NAXD PE=1 SV=1	N-Term(TMT6plex); C7(Carbamidomethyl); [Y]15(Phospho); K23(TMT6plex)
	ALB	0.119707	0.00672821	-1.76032	-0.702026	-0.957786	1.2364	1.83333	0.789912	1.72152	1.0829						-0.456126	-1.47432	-1.52697	-2.09598	-1.7271	-0.260676	3	Serum albumin OS=Homo sapiens OX=9606 GN=ALB PE=1 SV=2	N-Term(TMT6plex); [Y]1(Phospho)
	RAB2B	0.33793	-0.374918	1.00411	1.50386	0.281463											-1.42698	-1.14745	-0.396331	-1.96238	-0.428565	-0.260926	2	Ras-related protein Rab-2B OS=Homo sapiens OX=9606 GN=RAB2B PE=1 SV=1	N-Term(TMT6plex); [Y]2(Phospho); K7(TMT6plex)
	NPEPPSL1	0.127919	-0.499794	1.41964	0.143329	-0.213804						-1.20505	-0.592744	-0.732228	-0.396911	-0.6653						-0.261495	2	Puromycin-sensitive aminopeptidase-like protein OS=Homo sapiens OX=9606 GN=NPEPPSL1 PE=2 SV=3; Puromycin-sensitive aminopeptidase OS=Homo sapiens OX=9606 GN=NPEPPS PE=1 SV=2	N-Term(TMT6plex); [Y]1(Phospho)
	MAPK1	-0.328029	-1.01503	-0.0346312	-0.981061	-0.0568538	1.39737	2.07071	1.01207	1.66518	1.42913	-0.977948	0.140205	-2.12322	0.10692	-1.00779	-0.486702	-0.587927	-1.82011	-2.52388	-1.30421	-0.271291	4	Mitogen-activated protein kinase 1 OS=Homo sapiens OX=9606 GN=MAPK1 PE=1 SV=3	N-Term(TMT6plex); [Y]15(Phospho)
	SETDB2																-0.883074	1.07496	-2.01894	-0.105597	0.566463	-0.273237	1	Histone-lysine N-methyltransferase SETDB2 OS=Homo sapiens OX=9606 GN=SETDB2 PE=1 SV=2	N-Term(TMT6plex); [Y]1(Phospho)
	PDLIM1	-0.917917	-1.79587	0.122654	0.278165	0.943366																-0.27392	1	PDZ and LIM domain protein 1 OS=Homo sapiens OX=9606 GN=PDLIM1 PE=1 SV=4	N-Term(TMT6plex); [Y]7(Phospho); K15(TMT6plex)
	YWHAG	0.350619	-1.00913	0.297965	-0.0247262	-0.623289						-0.723545	-0.0159201	0.33453	-0.442507	-0.910786						-0.276679	2	14-3-3 protein gamma OS=Homo sapiens OX=9606 GN=YWHAG PE=1 SV=2	N-Term(TMT6plex); [Y]1(Phospho); K10(TMT6plex)
	GDI1	0.42682	0.00878572	0.23194	0.911452	0.112938											-0.447735	-1.89964	-0.61268	-1.48626	-0.0194532	-0.277384	2	Rab GDP dissociation inhibitor alpha OS=Homo sapiens OX=9606 GN=GDI1 PE=1 SV=2; Rab GDP dissociation inhibitor beta OS=Homo sapiens OX=9606 GN=GDI2 PE=1 SV=2	N-Term(TMT6plex); [Y]4(Phospho)
	ANXA2P2	-1.01707	-1.06142	0.0723152	0.500627	-0.283482	1.84425	1.13732	1.68351	0.878645	1.00759	-2.09478	-2.70523	-1.42115	0.977064	1.0068	-1.6922	-1.17456	-1.58463	-1.45484	-0.2351	-0.280817	4	Putative annexin A2-like protein OS=Homo sapiens OX=9606 GN=ANXA2P2 PE=5 SV=2; Annexin A2 OS=Homo sapiens OX=9606 GN=ANXA2 PE=1 SV=2	N-Term(TMT6plex); [Y]4(Phospho); C6(Carbamidomethyl)
	FYN																0.442433	-0.2253	-0.510056	-0.978954	-0.179034	-0.290182	1	Tyrosine-protein kinase Fyn OS=Homo sapiens OX=9606 GN=FYN PE=1 SV=3	N-Term(TMT6plex); K1(TMT6plex); [Y]27(Phospho)
	YES1	-1.04246	-1.61736	-0.136019	-0.421609	-0.0995278	0.266441	0.911697	2.2852	0.54343	0.428381	-0.444641	-0.894091	-0.506265	-1.156	-1.18673	-0.731516	-1.30294	0.339074	-0.629436	-0.425938	-0.291015	4	Tyrosine-protein kinase Yes OS=Homo sapiens OX=9606 GN=YES1 PE=1 SV=3; Tyrosine-protein kinase Fyn OS=Homo sapiens OX=9606 GN=FYN PE=1 SV=3	N-Term(TMT6plex); K1(TMT6plex); [Y]7(Phospho)
	STAT1																0.637811	-0.471606	-1.56868	-0.243494	0.163123	-0.29657	1	Signal transducer and activator of transcription 1-alpha/beta OS=Homo sapiens OX=9606 GN=STAT1 PE=1 SV=2	N-Term(TMT6plex); [Y]4(Phospho); K6(TMT6plex)
	STAT3	0.215606	-0.66925	0.290711	0.0607104	1.1078	-0.744026	-0.514063	-0.181569	0.787843	0.87976	-1.04482	-0.688034	-0.622319	-0.853826	0.264986	0.135829	-1.65045	-0.347694	0.0265754	-2.47809	-0.301216	4	Signal transducer and activator of transcription 3 OS=Homo sapiens OX=9606 GN=STAT3 PE=1 SV=2	N-Term(TMT6plex); C2(Carbamidomethyl); [Y]20(Phospho); K22(TMT6plex)
	FGD5																-0.870366	-0.0145869	-1.33197	0.406696	0.287659	-0.304514	1	FYVE, RhoGEF and PH domain-containing protein 5 OS=Homo sapiens OX=9606 GN=FGD5 PE=1 SV=3	N-Term(TMT6plex); [Y]4(Phospho); C6(Carbamidomethyl)
	CAT	-0.245463	0.0989052	-0.10053	2.96026	0.0289619											-1.69428	-1.23226	-0.685955	-1.59112	-0.744513	-0.320599	2	Catalase OS=Homo sapiens OX=9606 GN=CAT PE=1 SV=3	N-Term(TMT6plex); [Y]7(Phospho); K16(TMT6plex)
	ACTG2	-1.40373	-1.01835	-0.340726	-0.727096	-1.0952	4.34387	2.02096	3.62002	2.81027	3.20055	-2.80101	-0.864348	-0.679512	-0.697109	-1.60163	-2.00269	-3.07236	-2.36293	-2.03813	-1.83167	-0.327041	4	Actin, gamma-enteric smooth muscle OS=Homo sapiens OX=9606 GN=ACTG2 PE=1 SV=1; Actin, cytoplasmic 1 OS=Homo sapiens OX=9606 GN=ACTB PE=1 SV=1; Actin, aortic smooth muscle OS=Homo sapiens OX=9606 GN=ACTA2 PE=1 SV=1; Actin, alpha skeletal muscle OS=Homo sapiens OX=9606 GN=ACTA1 PE=1 SV=1; Beta-actin-like protein 2 OS=Homo sapiens OX=9606 GN=ACTBL2 PE=1 SV=2; Actin, alpha cardiac muscle 1 OS=Homo sa…	N-Term(TMT6plex); [Y]5(Phospho); K8(TMT6plex)
	SND1																0.3628	-0.468706	-0.978497	-0.77719	0.2107	-0.330179	1	Staphylococcal nuclease domain-containing protein 1 OS=Homo sapiens OX=9606 GN=SND1 PE=1 SV=1	N-Term(TMT6plex); [Y]7(Phospho)
	DSP	0.541836	-0.125075	0.0654578	0.189216	-0.531792	-1.05736	-0.468211	0.587659	-0.33172	0.222276	0.865319	-0.0534117	-1.3719	-1.95372	-0.314264	-1.58701	-0.237115	0.835759	-1.01197	-0.90956	-0.33228	4	Desmoplakin OS=Homo sapiens OX=9606 GN=DSP PE=1 SV=3	N-Term(TMT6plex); [Y]5(Phospho); C7(Carbamidomethyl); K18(TMT6plex)
	SLC4A1																-0.486447	0.347168	-1.05354	0.0021375	-0.491084	-0.336352	1	Band 3 anion transport protein OS=Homo sapiens OX=9606 GN=SLC4A1 PE=1 SV=3	N-Term(TMT6plex); [Y]3(Phospho)
	DCTN2																0.0682117	-0.61017	-0.555491	-0.32782	-0.287004	-0.342455	1	Dynactin subunit 2 OS=Homo sapiens OX=9606 GN=DCTN2 PE=1 SV=4	N-Term(TMT6plex); [Y]1(Phospho)
	TNS1	-1.66686	-1.814	0.263105	-0.34955	-0.848659	2.29881	2.91723	2.35125	3.31424	3.04104	-2.07051	-1.51624	-0.894211	-1.93464	-1.06445	-1.27855	-2.22441	-0.953316	-2.25532	-2.23341	-0.345922	4	Tensin-1 OS=Homo sapiens OX=9606 GN=TNS1 PE=1 SV=2	N-Term(TMT6plex); [Y]7(Phospho); C10(Carbamidomethyl); K21(TMT6plex)
	EEF1A2	-0.0617869	-1.01637	0.199245	-0.709698	0.308299	0.38742	-0.693349	-0.34024	-0.455888	0.228918						-0.644889	-1.21509	-0.82888	-0.544289	0.0111962	-0.358361	3	Elongation factor 1-alpha 2 OS=Homo sapiens OX=9606 GN=EEF1A2 PE=1 SV=1; Elongation factor 1-alpha 1 OS=Homo sapiens OX=9606 GN=EEF1A1 PE=1 SV=1; Putative elongation factor 1-alpha-like 3 OS=Homo sapiens OX=9606 GN=EEF1A1P5 PE=5 SV=1	N-Term(TMT6plex); [Y]7(Phospho); K12(TMT6plex)
	HBE1																0.0673202	0.808513	-0.813137	-0.865351	-0.991553	-0.358841	1	Hemoglobin subunit epsilon OS=Homo sapiens OX=9606 GN=HBE1 PE=1 SV=2; Hemoglobin subunit delta OS=Homo sapiens OX=9606 GN=HBD PE=1 SV=2; Hemoglobin subunit gamma-1 OS=Homo sapiens OX=9606 GN=HBG1 PE=1 SV=2; Hemoglobin subunit beta OS=Homo sapiens OX=9606 GN=HBB PE=1 SV=2; Hemoglobin subunit gamma-2 OS=Homo sapiens OX=9606 GN=HBG2 PE=1 SV=2	N-Term(TMT6plex); [Y]5(Phospho)
	PDHA1																-1.52132	1.13986	-2.6285	0.610579	0.602332	-0.35941	1	Pyruvate dehydrogenase E1 component subunit alpha, somatic form, mitochondrial OS=Homo sapiens OX=9606 GN=PDHA1 PE=1 SV=3; Pyruvate dehydrogenase E1 component subunit alpha, testis-specific form, mitochondrial OS=Homo sapiens OX=9606 GN=PDHA2 PE=1 SV=1	N-Term(TMT6plex); S5(Phospho); S12(Phospho); [Y]13(Phospho)
	CALU	0.188665	-0.738246	-0.216925	0.338132	0.0423448											-0.261545	-1.61724	-0.677593	-1.0494	0.349349	-0.364246	2	Calumenin OS=Homo sapiens OX=9606 GN=CALU PE=1 SV=2	N-Term(TMT6plex); [Y]3(Phospho)
	MAPK12	0.724765	-0.802108	-0.38556	-0.038239	0.84053	-0.171492	-0.653263	0.815684	0.678659	0.399831	1.10631	-0.0288273	-2.42471	-0.602196	-0.40064	-0.307451	-1.91351	0.727777	-2.28492	-2.66003	-0.36897	4	Mitogen-activated protein kinase 12 OS=Homo sapiens OX=9606 GN=MAPK12 PE=1 SV=3	N-Term(TMT6plex); [Y]9(Phospho)
	SLC25A6																0.315742	-1.95295	0.862625	-1.12488	0.0284859	-0.374196	1	ADP/ATP translocase 3 OS=Homo sapiens OX=9606 GN=SLC25A6 PE=1 SV=4; ADP/ATP translocase 1 OS=Homo sapiens OX=9606 GN=SLC25A4 PE=1 SV=4	N-Term(TMT6plex); [Y]3(Phospho); K11(TMT6plex)
	PGAM4	-0.0224196	0.0652385	0.645625	0.769862	0.346371	-1.53009	-1.5492	-0.455374	-1.51264	-0.837824	-0.61695	0.136607	0.925413	-0.427175	-0.198461	-0.463506	-0.605242	-1.22292	-0.585846	-0.355891	-0.374721	4	Probable phosphoglycerate mutase 4 OS=Homo sapiens OX=9606 GN=PGAM4 PE=3 SV=1; Phosphoglycerate mutase 1 OS=Homo sapiens OX=9606 GN=PGAM1 PE=1 SV=2; Phosphoglycerate mutase 2 OS=Homo sapiens OX=9606 GN=PGAM2 PE=1 SV=3	N-Term(TMT6plex); [Y]2(Phospho); K10(TMT6plex)
	ANXA2P2						-0.707674	-2.17333	0.852751	-0.0543294	0.20887											-0.374742	1	Putative annexin A2-like protein OS=Homo sapiens OX=9606 GN=ANXA2P2 PE=5 SV=2; Annexin A2 OS=Homo sapiens OX=9606 GN=ANXA2 PE=1 SV=2	N-Term(TMT6plex); [Y]5(Phospho)
	DES	-0.707674	-2.17333	0.852751	-0.0543294	0.20887																-0.374742	1	Desmin OS=Homo sapiens OX=9606 GN=DES PE=1 SV=3	N-Term(TMT6plex); [Y]8(Phospho)
	FLNA																0.333451	-0.483828	-0.293239	-0.805054	-0.66919	-0.383572	1	Filamin-A OS=Homo sapiens OX=9606 GN=FLNA PE=1 SV=4	N-Term(TMT6plex); C11(Carbamidomethyl); K20(TMT6plex); [Y]21(Phospho)
	SARS2	-1.05736	-0.468211	0.587659	-0.33172	0.222276	-0.703507	-0.951395	1.06242	1.57855	0.836878	-1.44385	-0.422575	-0.862153	-0.388947	-0.521323	-0.267136	-1.97704	-0.515962	-1.1016	-1.01981	-0.38724	4	Serine--tRNA ligase, mitochondrial OS=Homo sapiens OX=9606 GN=SARS2 PE=1 SV=1	N-Term(TMT6plex); [Y]3(Phospho)
	UQCRFS1P1						-1.82586	-1.79166	0.386188	-1.1671	-0.638403	-0.978616	-0.553871	0.224911	0.30233	-0.0449722	0.716829	-0.899642	1.20009	-0.687992	-0.0690209	-0.388453	3	Putative cytochrome b-c1 complex subunit Rieske-like protein 1 OS=Homo sapiens OX=9606 GN=UQCRFS1P1 PE=5 SV=1; Cytochrome b-c1 complex subunit Rieske, mitochondrial OS=Homo sapiens OX=9606 GN=UQCRFS1 PE=1 SV=2	N-Term(TMT6plex); [Y]7(Phospho)
	DES	0.135139	0.521598	1.26008	0.904244	0.393053											-1.8132	-2.16687	-1.61791	-0.692507	-0.902326	-0.39787	2	Desmin OS=Homo sapiens OX=9606 GN=DES PE=1 SV=3	N-Term(TMT6plex); [Y]8(Phospho)
	MAPK1											-0.202074	0.100154	-1.47231	0.0898132	-0.507475						-0.398378	1	Mitogen-activated protein kinase 1 OS=Homo sapiens OX=9606 GN=MAPK1 PE=1 SV=3	N-Term(TMT6plex); T9(Phospho); [Y]15(Phospho)
	TNS1																-0.916741	-0.294049	-0.755614	-0.228225	0.189984	-0.400929	1	Tensin-1 OS=Homo sapiens OX=9606 GN=TNS1 PE=1 SV=2	N-Term(TMT6plex); S3(Phospho); [Y]7(Phospho); C10(Carbamidomethyl); K21(TMT6plex)
	MYLK	0.101012	-0.712329	-0.299667	-0.416473	-0.682395																-0.40197	1	Myosin light chain kinase, smooth muscle OS=Homo sapiens OX=9606 GN=MYLK PE=1 SV=4	N-Term(TMT6plex); [Y]4(Phospho); K13(TMT6plex)
	DES	-0.179212	-0.864342	0.111831	-0.840107	-0.263154																-0.406997	1	Desmin OS=Homo sapiens OX=9606 GN=DES PE=1 SV=3	N-Term(TMT6plex); [Y]6(Phospho)
	PHB	-0.941738	-0.220575	0.506367	-0.888915	0.513139											-1.02063	-2.286	-0.146432	-0.35867	0.747041	-0.409641	2	Prohibitin OS=Homo sapiens OX=9606 GN=PHB PE=1 SV=1	N-Term(TMT6plex); K1(TMT6plex); [Y]10(Phospho)
	WDR1											-1.75336	0.0660982	0.0336418	-0.144627	-0.252777						-0.410205	1	WD repeat-containing protein 1 OS=Homo sapiens OX=9606 GN=WDR1 PE=1 SV=4	N-Term(TMT6plex); [Y]7(Phospho); K25(TMT6plex)
	GAB1																-0.925949	-0.885294	-0.856291	0.0791943	0.477347	-0.422199	1	GRB2-associated-binding protein 1 OS=Homo sapiens OX=9606 GN=GAB1 PE=1 SV=2	N-Term(TMT6plex); S7(Phospho); [Y]15(Phospho); K22(TMT6plex)
	ANXA2P2	-0.201077	-0.169362	-0.732823	1.7159	-0.122107	-1.11699	-1.11463	-0.537731	-0.787303	-0.755261						-0.385527	-0.823117	-0.741627	-0.799089	0.066501	-0.433617	3	Putative annexin A2-like protein OS=Homo sapiens OX=9606 GN=ANXA2P2 PE=5 SV=2; Annexin A2 OS=Homo sapiens OX=9606 GN=ANXA2 PE=1 SV=2	N-Term(TMT6plex); [Y]3(Phospho); K11(TMT6plex)
	TPSD1																-0.369687	-0.400976	-1.18871	-0.640429	0.422797	-0.435401	1	Tryptase delta OS=Homo sapiens OX=9606 GN=TPSD1 PE=2 SV=2; Tryptase alpha/beta-1 OS=Homo sapiens OX=9606 GN=TPSAB1 PE=1 SV=1	N-Term(TMT6plex); [Y]6(Phospho)
	ALB	0.328365	0.200413	-1.54437	-0.763864	-0.928475	-0.249093	-0.0214097	1.04788	2.12465	0.920764	-0.724655	-1.45002	-0.210975	-0.325681	-0.767642	-0.646774	-1.1971	-0.158067	-2.68368	-1.70078	-0.437526	4	Serum albumin OS=Homo sapiens OX=9606 GN=ALB PE=1 SV=2	N-Term(TMT6plex); [Y]3(Phospho)
	YWHAZ	0.00323836	-1.24797	0.487855	-0.184765	-0.153728											-0.311938	-1.36116	-0.850859	-0.782304	0.000949506	-0.440068	2	14-3-3 protein zeta/delta OS=Homo sapiens OX=9606 GN=YWHAZ PE=1 SV=1	N-Term(TMT6plex); [Y]1(Phospho); K11(TMT6plex)
	TJP1	-0.660959	-0.887144	0.54921	0.730264	0.840101											-0.528447	-0.156525	-2.0583	-1.16835	-1.06102	-0.440117	2	Tight junction protein ZO-1 OS=Homo sapiens OX=9606 GN=TJP1 PE=1 SV=3	N-Term(TMT6plex); [Y]4(Phospho); K15(TMT6plex)
	CSRP1	-0.686238	0.417312	0.312825	-0.108953	-0.227028						-0.987261	-0.132714	0.153768	0.235391	-1.25016	-1.06283	-1.08087	-1.10776	-1.26911	0.0916907	-0.446796	3	Cysteine and glycine-rich protein 1 OS=Homo sapiens OX=9606 GN=CSRP1 PE=1 SV=3	N-Term(TMT6plex); [Y]15(Phospho); C16(Carbamidomethyl); K17(TMT6plex)
	CTNND1											2.12652	0.297815	-1.57201	0.00280228	-0.244063	-1.0206	-0.675461	-2.80183	-0.711621	0.12152	-0.447692	2	Catenin delta-1 OS=Homo sapiens OX=9606 GN=CTNND1 PE=1 SV=1	N-Term(TMT6plex); [Y]1(Phospho)
	FLNA											-1.42481	0.134839	0.381906	-0.0984844	0.458477	-0.182315	-1.6425	-1.19005	-0.861134	-0.0528621	-0.447693	2	Filamin-A OS=Homo sapiens OX=9606 GN=FLNA PE=1 SV=4	N-Term(TMT6plex); C11(Carbamidomethyl); [Y]12(Phospho); K20(TMT6plex)
	DDR2											0.336918	0.243801	0.509588	0.116315	0.0137617	-0.415189	-1.13856	-0.37339	-1.95513	-1.91671	-0.45786	2	Discoidin domain-containing receptor 2 OS=Homo sapiens OX=9606 GN=DDR2 PE=1 SV=2	N-Term(TMT6plex); [Y]7(Phospho)
	GSN	0.0127665	-0.961094	-1.31057	0.199197	-0.251061																-0.462152	1	Gelsolin OS=Homo sapiens OX=9606 GN=GSN PE=1 SV=1	N-Term(TMT6plex); [Y]6(Phospho); K18(TMT6plex)
	CSRP1	-1.53956	-0.831881	0.365593	-0.281996	-0.169323																-0.491434	1	Cysteine and glycine-rich protein 1 OS=Homo sapiens OX=9606 GN=CSRP1 PE=1 SV=3	N-Term(TMT6plex); K10(TMT6plex); [Y]15(Phospho); C16(Carbamidomethyl); K17(TMT6plex)
	DSTN	-0.582324	-0.949341	-0.269122	0.43733	0.254338											-0.0203882	-2.28688	-0.326403	-0.649291	-0.568767	-0.496085	2	Destrin OS=Homo sapiens OX=9606 GN=DSTN PE=1 SV=3	N-Term(TMT6plex); [Y]3(Phospho); K6(TMT6plex)
	SHC1	0.0490989	0.253924	1.19162	0.0145077	0.640944											-1.55343	-0.265569	-1.09155	-2.82927	-1.54067	-0.513039	2	SHC-transforming protein 1 OS=Homo sapiens OX=9606 GN=SHC1 PE=1 SV=4	N-Term(TMT6plex); [Y]22(Phospho); K28(TMT6plex)
	TNS1																-0.321185	-0.847116	-2.0152	0.455031	0.154073	-0.51488	1	Tensin-1 OS=Homo sapiens OX=9606 GN=TNS1 PE=1 SV=2	N-Term(TMT6plex); S3(Phospho); [Y]31(Phospho); K33(TMT6plex)
	YWHAQ											-0.911177	0.0793554	-0.0657866	-0.410397	-1.28533						-0.518666	1	14-3-3 protein theta OS=Homo sapiens OX=9606 GN=YWHAQ PE=1 SV=1	N-Term(TMT6plex); [Y]1(Phospho); C7(Carbamidomethyl)
	PGAM1	-0.814778	-0.370609	0.90466	-0.166918	0.569453						-1.62913	-0.0847562	-0.341309	-0.101481	-0.797986	-0.867076	-1.68638	-1.3701	-0.61951	-0.706053	-0.538798	3	Phosphoglycerate mutase 1 OS=Homo sapiens OX=9606 GN=PGAM1 PE=1 SV=2	N-Term(TMT6plex); [Y]5(Phospho); K18(TMT6plex)
	FLNA	-0.416824	-0.283698	1.4795	0.224159	1.18543						-2.26669	-1.18371	-0.725911	0.392288	-1.15123	-0.769653	-1.23792	-1.29444	-1.78612	-0.47353	-0.55389	3	Filamin-A OS=Homo sapiens OX=9606 GN=FLNA PE=1 SV=4	N-Term(TMT6plex); [Y]10(Phospho); K22(TMT6plex)
	GSN	-1.31538	-2.14139	-1.64181	-1.7262	-1.85083	-0.0565137	-0.488194	1.25757	0.397042	1.96308											-0.560262	2	Gelsolin OS=Homo sapiens OX=9606 GN=GSN PE=1 SV=1	N-Term(TMT6plex); [Y]6(Phospho); K18(TMT6plex)
	MISP	-0.171492	-0.653263	0.815684	0.678659	0.399831	-2.2396	-3.22649	1.45624	-0.504332	-0.156601	0.990248	-0.607576	-1.28844	-0.536379	0.117089	-0.657173	-0.239174	-2.34122	-1.35614	-1.76538	-0.564274	4	Mitotic interactor and substrate of PLK1 OS=Homo sapiens OX=9606 GN=MISP PE=1 SV=1	N-Term(TMT6plex); [Y]15(Phospho)
	PIK3R1	0.38742	-0.693349	-0.34024	-0.455888	0.228918	-0.902219	-1.06752	-0.994981	-0.313902	-0.469867	-0.890321	-0.422383	-1.50397	-0.898906	-0.450031						-0.585816	3	Phosphatidylinositol 3-kinase regulatory subunit alpha OS=Homo sapiens OX=9606 GN=PIK3R1 PE=1 SV=2	N-Term(TMT6plex); [Y]3(Phospho); K10(TMT6plex)
	ANXA2P2																-0.587353	-0.751955	-0.0174536	-1.15649	-0.481551	-0.59896	1	Putative annexin A2-like protein OS=Homo sapiens OX=9606 GN=ANXA2P2 PE=5 SV=2; Annexin A2 OS=Homo sapiens OX=9606 GN=ANXA2 PE=1 SV=2	N-Term(TMT6plex); [Y]5(Phospho); K13(TMT6plex)
	PKP4						-1.58547	-1.94302	-2.10015	-1.21956	-1.6693						-0.278088	-0.00872545	1.17786	-0.216497	1.8465	-0.599644	2	Plakophilin-4 OS=Homo sapiens OX=9606 GN=PKP4 PE=1 SV=2	N-Term(TMT6plex); [Y]5(Phospho); K12(TMT6plex)
	ST5											-1.60141	-1.23842	-1.04047	-0.355626	1.22981						-0.601225	1	Suppression of tumorigenicity 5 protein OS=Homo sapiens OX=9606 GN=ST5 PE=1 SV=3	N-Term(TMT6plex); K17(TMT6plex); [Y]21(Phospho); K27(TMT6plex)
	ACTG2	-2.135	-1.76325	-0.235542	-1.92237	-1.86797	2.5439	0.514005	0.25649	1.80735	3.47499	-2.54221	-1.83943	-0.635454	-1.94977	-2.74254						-0.602452	3	Actin, gamma-enteric smooth muscle OS=Homo sapiens OX=9606 GN=ACTG2 PE=1 SV=1; Actin, aortic smooth muscle OS=Homo sapiens OX=9606 GN=ACTA2 PE=1 SV=1; Actin, alpha skeletal muscle OS=Homo sapiens OX=9606 GN=ACTA1 PE=1 SV=1; Actin, alpha cardiac muscle 1 OS=Homo sapiens OX=9606 GN=ACTC1 PE=1 SV=1	N-Term(TMT6plex); [Y]2(Phospho)
	PGAM1	-1.20358	-0.40864	0.596712	-0.206908	0.520911						-1.61475	-0.327674	0.0361334	0.338642	-0.484418	-1.55823	-2.10991	-1.38997	-0.777733	-0.945458	-0.635658	3	Phosphoglycerate mutase 1 OS=Homo sapiens OX=9606 GN=PGAM1 PE=1 SV=2	N-Term(TMT6plex); [Y]5(Phospho); K18(TMT6plex)
	MYH11	-0.466019	-0.992882	1.23331	-0.41343	0.328429						-1.88118	-0.367771	-0.200719	-0.0157985	-0.719712	-0.962316	-1.96288	-1.31906	-1.74	-0.470027	-0.663337	3	Myosin-11 OS=Homo sapiens OX=9606 GN=MYH11 PE=1 SV=3	N-Term(TMT6plex); [Y]5(Phospho); K14(TMT6plex)
	TMC5						-1.04246	-1.61736	-0.136019	-0.421609	-0.0995278											-0.663395	1	Transmembrane channel-like protein 5 OS=Homo sapiens OX=9606 GN=TMC5 PE=2 SV=3	N-Term(TMT6plex); [Y]16(Phospho)
	SLC26A3	0.0742413	-1.684	-0.635189	1.59994	1.7668	-1.48773	-1.36468	-0.856752	-0.0185756	-0.492998	0.169025	0.271627	-2.62904	0.535984	-1.31915	-1.80694	0.889954	-1.96767	-1.39317	-3.16477	-0.675655	4	Chloride anion exchanger OS=Homo sapiens OX=9606 GN=SLC26A3 PE=1 SV=1	N-Term(TMT6plex); [Y]2(Phospho); K9(TMT6plex)
	HSPB1	0.960063	1.30431	1.80714	0.131521	1.02851	-3.74536	-2.86221	-1.08486	-2.86591	-3.38017						-1.11597	1.24519	-2.11792	0.0166528	0.374881	-0.686942	3	Heat shock protein beta-1 OS=Homo sapiens OX=9606 GN=HSPB1 PE=1 SV=2	N-Term(TMT6plex); [Y]6(Phospho)
	ANXA2P2	-1.59019	-0.183965	-0.979512	-0.340713	-1.06628	-0.261916	-0.792186	0.408074	-0.595605	0.208982	-1.27826	-1.42278	-0.0912738	-0.537571	0.233232	-1.58044	-1.29357	-1.22869	-1.00279	-0.40509	-0.690027	4	Putative annexin A2-like protein OS=Homo sapiens OX=9606 GN=ANXA2P2 PE=5 SV=2; Annexin A2 OS=Homo sapiens OX=9606 GN=ANXA2 PE=1 SV=2	N-Term(TMT6plex); [Y]5(Phospho); K11(TMT6plex)
	PALLD	-1.64029	-0.699895	-0.225435	-0.272444	-0.414745						-1.56469	-0.33579	-0.22218	-0.295147	-1.23602						-0.690664	2	Palladin OS=Homo sapiens OX=9606 GN=PALLD PE=1 SV=3	N-Term(TMT6plex); [Y]1(Phospho); K12(TMT6plex)
	DUSP3	-0.546395	-0.442776	0.837536	-0.362203	0.313396											-1.25375	-1.55437	-2.31239	-0.899202	-0.853892	-0.707405	2	Dual specificity protein phosphatase 3 OS=Homo sapiens OX=9606 GN=DUSP3 PE=1 SV=1	N-Term(TMT6plex); [Y]12(Phospho)
	ANXA2P2	-0.902219	-1.06752	-0.994981	-0.313902	-0.469867						0.717274	-0.639256	-1.92235	-1.18403	-0.432833	0.908233	-0.814281	0.0963081	-2.37078	-1.24143	-0.708775	3	Putative annexin A2-like protein OS=Homo sapiens OX=9606 GN=ANXA2P2 PE=5 SV=2; Annexin A2 OS=Homo sapiens OX=9606 GN=ANXA2 PE=1 SV=2	N-Term(TMT6plex); [Y]2(Phospho); K19(TMT6plex)
	IDH1																-1.17164	-1.79566	-0.484763	0.304629	-0.459981	-0.721484	1	Isocitrate dehydrogenase [NADP] cytoplasmic OS=Homo sapiens OX=9606 GN=IDH1 PE=1 SV=2	N-Term(TMT6plex); [Y]3(Phospho); K12(TMT6plex)
	CNN3	-0.49493	-0.0185778	-0.57059	0.126024	0.137142											-0.277306	-1.79834	-1.06896	-1.97322	-1.62555	-0.756431	2	Calponin-3 OS=Homo sapiens OX=9606 GN=CNN3 PE=1 SV=1	N-Term(TMT6plex); [Y]5(Phospho)
	TRIOBP																-0.345695	-1.18957	-1.97328	-0.381946	0.105313	-0.757036	1	TRIO and F-actin-binding protein OS=Homo sapiens OX=9606 GN=TRIOBP PE=1 SV=3	N-Term(TMT6plex); [Y]5(Phospho)
	LPP																-0.70915	-0.890686	-0.64618	-0.63711	-0.989039	-0.774433	1	Lipoma-preferred partner OS=Homo sapiens OX=9606 GN=LPP PE=1 SV=1	N-Term(TMT6plex); [Y]13(Phospho)
	MYL9	-1.83866	-1.08043	0.712765	-0.977523	0.0148329											0.00126323	-2.39916	-0.606501	-1.01618	-0.569699	-0.775929	2	Myosin regulatory light polypeptide 9 OS=Homo sapiens OX=9606 GN=MYL9 PE=1 SV=4	N-Term(TMT6plex); [Y]5(Phospho)
	ALDH1A1	-0.50074	-0.263387	-0.950219	2.09306	0.225907						-1.71552	-0.758891	-1.07007	-0.817003	-1.19577	-1.88887	-1.85469	-0.589307	-1.73816	-0.757468	-0.785408	3	Retinal dehydrogenase 1 OS=Homo sapiens OX=9606 GN=ALDH1A1 PE=1 SV=2	N-Term(TMT6plex); [Y]5(Phospho); K14(TMT6plex)
	SLC25A6	-0.603771	-2.736	1.99829	-0.376389	-0.0451637											-0.68099	-2.2371	-1.20193	-1.70606	-0.311528	-0.790064	2	ADP/ATP translocase 3 OS=Homo sapiens OX=9606 GN=SLC25A6 PE=1 SV=4; ADP/ATP translocase 1 OS=Homo sapiens OX=9606 GN=SLC25A4 PE=1 SV=4	N-Term(TMT6plex); [Y]7(Phospho); K11(TMT6plex)
	ARRB1											-1.70688	-1.04977	0.145513	-0.228141	-1.23352						-0.814559	1	Beta-arrestin-1 OS=Homo sapiens OX=9606 GN=ARRB1 PE=1 SV=2	N-Term(TMT6plex); [Y]22(Phospho); K24(TMT6plex)
	FHL1	-1.4477	-0.921265	-0.946057	-1.3885	-1.8821	0.390256	-0.607606	0.702528	0.616779	0.0275138	-0.403573	0.262892	-0.203053	0.64155	-1.00839	-2.20717	-1.25031	-1.54346	-3.1317	-2.2225	-0.826094	4	Four and a half LIM domains protein 1 OS=Homo sapiens OX=9606 GN=FHL1 PE=1 SV=4	N-Term(TMT6plex); [Y]8(Phospho); C10(Carbamidomethyl); C13(Carbamidomethyl); K15(TMT6plex)
	VAC14	-0.955854	-1.50852	-0.686097	-0.566151	-0.438537																-0.831032	1	Protein VAC14 homolog OS=Homo sapiens OX=9606 GN=VAC14 PE=1 SV=1	N-Term(TMT6plex); [Y]2(Phospho); C4(Carbamidomethyl); K12(TMT6plex)
	UGGT1	-0.909182	-1.10629	-0.159543	0.578246	-0.282255	-1.83225	-1.66751	0.2036	-1.76346	-1.46643											-0.840508	2	UDP-glucose:glycoprotein glucosyltransferase 1 OS=Homo sapiens OX=9606 GN=UGGT1 PE=1 SV=3	N-Term(TMT6plex); [Y]4(Phospho); K8(TMT6plex)
	ALDH1A1	-1.48773	-1.36468	-0.856752	-0.0185756	-0.492998																-0.844147	1	Retinal dehydrogenase 1 OS=Homo sapiens OX=9606 GN=ALDH1A1 PE=1 SV=2	N-Term(TMT6plex); [Y]6(Phospho); C13(Carbamidomethyl); K15(TMT6plex)
	NCK2											-0.408109	-0.745256	-1.97721	0.639038	-1.74682						-0.847673	1	Cytoplasmic protein NCK2 OS=Homo sapiens OX=9606 GN=NCK2 PE=1 SV=2	N-Term(TMT6plex); S3(Phospho); [Y]23(Phospho); K32(TMT6plex)
	FER	-1.10273	-2.08109	2.31956	-0.420867	1.31157	-1.61781	-1.82087	-0.311263	-1.30485	-1.71318	-2.3723	-2.46914	0.117258	-1.39654	-0.381382						-0.882909	3	Tyrosine-protein kinase Fer OS=Homo sapiens OX=9606 GN=FER PE=1 SV=2	N-Term(TMT6plex); K7(TMT6plex); [Y]15(Phospho)
	ICK	-0.0383706	-2.69406	0.229037	-1.32083	-0.610761																-0.886998	1	Serine/threonine-protein kinase ICK OS=Homo sapiens OX=9606 GN=ICK PE=1 SV=1	N-Term(TMT6plex); K2(TMT6plex); [Y]8(Phospho)
	NAPRT																-0.62885	-0.614292	-1.24595	-0.768858	-1.2235	-0.89629	1	Nicotinate phosphoribosyltransferase OS=Homo sapiens OX=9606 GN=NAPRT PE=1 SV=2	N-Term(TMT6plex); [Y]11(Phospho)
	HIST1H4A	-1.79228	-2.63602	-0.770206	-1.68266	-1.1905	2.27813	-0.202624	2.15369	1.89212	2.35607						-3.70037	-3.74922	-2.89296	-2.47431	-1.3545	-0.917709	3	Histone H4 OS=Homo sapiens OX=9606 GN=HIST1H4A PE=1 SV=2	N-Term(TMT6plex); [Y]9(Phospho); K12(TMT6plex)
	GSTM4	-1.63999	-1.47099	-0.67148	-0.118291	-0.743049																-0.928759	1	Glutathione S-transferase Mu 4 OS=Homo sapiens OX=9606 GN=GSTM4 PE=1 SV=3; Glutathione S-transferase Mu 1 OS=Homo sapiens OX=9606 GN=GSTM1 PE=1 SV=3; Glutathione S-transferase Mu 2 OS=Homo sapiens OX=9606 GN=GSTM2 PE=1 SV=2	N-Term(TMT6plex); [Y]5(Phospho); K13(TMT6plex)
	SYNM	-1.02795	-0.995829	0.470146	-0.608032	-0.1574											-1.17427	-2.00999	-1.76241	-1.01966	-1.186	-0.94714	2	Synemin OS=Homo sapiens OX=9606 GN=SYNM PE=1 SV=2	N-Term(TMT6plex); [Y]2(Phospho); C6(Carbamidomethyl)
	KRT18						-2.94671	-3.37873	-1.87495	-3.10925	-2.18794						1.51047	1.31675	-0.553303	-0.65018	2.34382	-0.953003	2	Keratin, type I cytoskeletal 18 OS=Homo sapiens OX=9606 GN=KRT18 PE=1 SV=2	N-Term(TMT6plex); [Y]7(Phospho)
	LANCL2	-1.12035	-1.44295	-0.690825	-0.12034	-1.58293																-0.99148	1	LanC-like protein 2 OS=Homo sapiens OX=9606 GN=LANCL2 PE=1 SV=1	N-Term(TMT6plex); K11(TMT6plex); [Y]16(Phospho)
	FERMT2	0.887376	-2.15592	2.04401	-0.0124917	0.806591						-2.64712	-1.19627	0.289035	-1.42859	-1.86079	-1.84047	-2.74413	-1.71928	-1.88936	-1.5188	-0.99908	3	Fermitin family homolog 2 OS=Homo sapiens OX=9606 GN=FERMT2 PE=1 SV=1	N-Term(TMT6plex); K1(TMT6plex); [Y]9(Phospho)
	MYH11											-1.57005	-0.722685	0.080729	-0.843534	-1.95611						-1.00233	1	Myosin-11 OS=Homo sapiens OX=9606 GN=MYH11 PE=1 SV=3	N-Term(TMT6plex); [Y]9(Phospho); K12(TMT6plex); K18(TMT6plex)
	PGM5	-1.82586	-1.79166	0.386188	-1.1671	-0.638403																-1.00737	1	Phosphoglucomutase-like protein 5 OS=Homo sapiens OX=9606 GN=PGM5 PE=1 SV=2	N-Term(TMT6plex); [Y]6(Phospho)
	TJP1																-0.79912	-1.08462	-1.55417	-0.211978	-1.44602	-1.01918	1	Tight junction protein ZO-1 OS=Homo sapiens OX=9606 GN=TJP1 PE=1 SV=3	N-Term(TMT6plex); [Y]7(Phospho)
	PGM5	-0.347454	-0.730752	0.0365331	-0.222672	-0.536413						-3.04833	-1.66319	-0.487568	-1.09459	-2.2106						-1.0305	2	Phosphoglucomutase-like protein 5 OS=Homo sapiens OX=9606 GN=PGM5 PE=1 SV=2	N-Term(TMT6plex); [Y]4(Phospho)
	ACTN1	-1.71533	-2.46178	-0.210231	-0.670415	-0.996799						-2.06156	-0.188635	-0.258831	-0.705345	-1.13869	-0.483937	-2.48524	-0.501579	-1.32202	-0.702468	-1.06019	3	Alpha-actinin-1 OS=Homo sapiens OX=9606 GN=ACTN1 PE=1 SV=2	N-Term(TMT6plex); K2(TMT6plex); [Y]4(Phospho); K13(TMT6plex)
	TNS1	-1.65802	-1.95635	-0.319462	-0.541394	-1.23806	-1.2165	-1.05278	0.976781	-0.416065	2.20968	-1.80992	-1.62113	-1.05373	-2.19518	-1.04671	-0.418108	-2.31877	-1.45427	-2.45906	-1.66403	-1.06265	4	Tensin-1 OS=Homo sapiens OX=9606 GN=TNS1 PE=1 SV=2	N-Term(TMT6plex); [Y]5(Phospho); C10(Carbamidomethyl); K21(TMT6plex)
	TNS1																-0.830147	-1.32154	-2.22691	0.0606596	-1.14508	-1.0926	1	Tensin-1 OS=Homo sapiens OX=9606 GN=TNS1 PE=1 SV=2	N-Term(TMT6plex); [Y]20(Phospho)
	GAB1																-0.609808	-1.64454	-1.58188	-0.326856	-1.55987	-1.14459	1	GRB2-associated-binding protein 1 OS=Homo sapiens OX=9606 GN=GAB1 PE=1 SV=2	N-Term(TMT6plex); [Y]9(Phospho); C10(Carbamidomethyl)
	ST5											-1.94556	-1.75354	-0.0480611	-1.03319	-1.03364						-1.1628	1	Suppression of tumorigenicity 5 protein OS=Homo sapiens OX=9606 GN=ST5 PE=1 SV=3	N-Term(TMT6plex); [Y]4(Phospho); K10(TMT6plex)
	CGN						-1.81772	-3.12035	1.2403	-1.09441	-1.03428	-0.0872331	-0.532791	-0.401678	-0.46557	-0.279674	-0.455643	-2.14292	-2.252	-2.345	-2.87196	-1.1774	3	Cingulin OS=Homo sapiens OX=9606 GN=CGN PE=1 SV=2	N-Term(TMT6plex); [Y]22(Phospho); K26(TMT6plex)
	YWHAZ											-1.34309	-0.508854	0.528756	-1.36244	-2.92111	-1.15011	-2.44491	-0.586347	-2.3268	-0.0471858	-1.21621	2	14-3-3 protein zeta/delta OS=Homo sapiens OX=9606 GN=YWHAZ PE=1 SV=1	N-Term(TMT6plex); [Y]1(Phospho); K11(TMT6plex); K12(TMT6plex)
	PGAM4	-1.11699	-1.11463	-0.537731	-0.787303	-0.755261						-2.15349	-1.14636	-1.81161	-1.03822	-1.77338						-1.2235	2	Probable phosphoglycerate mutase 4 OS=Homo sapiens OX=9606 GN=PGAM4 PE=3 SV=1; Phosphoglycerate mutase 1 OS=Homo sapiens OX=9606 GN=PGAM1 PE=1 SV=2; Phosphoglycerate mutase 2 OS=Homo sapiens OX=9606 GN=PGAM2 PE=1 SV=3	N-Term(TMT6plex); [Y]2(Phospho); K10(TMT6plex); K16(TMT6plex)
	VCL																-1.70243	-2.13664	-0.421623	-1.334	-0.525618	-1.22406	1	Vinculin OS=Homo sapiens OX=9606 GN=VCL PE=1 SV=4	N-Term(TMT6plex); [Y]20(Phospho)
	LPP	-1.44668	-0.429519	-0.0775019	-0.33821	-0.0293403						-1.66973	-1.4111	-1.39217	-1.65543	-0.972608	-1.91865	-1.95532	-3.52812	-1.16644	-1.39559	-1.29243	3	Lipoma-preferred partner OS=Homo sapiens OX=9606 GN=LPP PE=1 SV=1	N-Term(TMT6plex); [Y]7(Phospho)
	PXN	-0.855386	-1.22622	-0.181305	-0.612625	-0.475905						-1.28236	-1.97335	-2.09304	-1.3096	-1.00532	-2.09783	-1.87413	-1.36717	-1.55388	-1.49565	-1.29359	3	Paxillin OS=Homo sapiens OX=9606 GN=PXN PE=1 SV=3	N-Term(TMT6plex); [Y]8(Phospho); K13(TMT6plex); K15(TMT6plex)
	TES	-1.58912	-1.62953	-0.793255	-0.4218	-2.0352																-1.29378	1	Testin OS=Homo sapiens OX=9606 GN=TES PE=1 SV=1	N-Term(TMT6plex); C5(Carbamidomethyl); [Y]6(Phospho); C7(Carbamidomethyl); C8(Carbamidomethyl); K9(TMT6plex)
	FERMT2	-1.81772	-3.12035	1.2403	-1.09441	-1.03428	-1.40373	-1.01835	-0.340726	-0.727096	-1.0952	-2.71505	-0.944024	0.569874	-1.49474	-2.39991	-2.14245	-2.97865	-1.63822	-1.64229	-1.37483	-1.35859	4	Fermitin family homolog 2 OS=Homo sapiens OX=9606 GN=FERMT2 PE=1 SV=1	N-Term(TMT6plex); [Y]8(Phospho)
	PKM											-3.14319	-2.29457	-1.24906	1.243	-1.36807						-1.36238	1	Pyruvate kinase PKM OS=Homo sapiens OX=9606 GN=PKM PE=1 SV=4	N-Term(TMT6plex); C16(Carbamidomethyl); K25(TMT6plex); [Y]28(Phospho)
	DDR2																-1.43752	-1.64744	-0.493653	-1.82438	-1.50816	-1.38223	1	Discoidin domain-containing receptor 2 OS=Homo sapiens OX=9606 GN=DDR2 PE=1 SV=2	N-Term(TMT6plex); [Y]8(Phospho)
	CNN1	-1.83225	-1.66751	0.2036	-1.76346	-1.46643						-0.94855	-1.24925	0.453683	-2.80294	-2.98451						-1.40576	2	Calponin-1 OS=Homo sapiens OX=9606 GN=CNN1 PE=1 SV=2	N-Term(TMT6plex); [Y]4(Phospho); K11(TMT6plex)
	ARRB1																-1.20566	-2.18134	-1.3533	-1.49031	-0.910849	-1.42829	1	Beta-arrestin-1 OS=Homo sapiens OX=9606 GN=ARRB1 PE=1 SV=2	N-Term(TMT6plex); [Y]22(Phospho); K24(TMT6plex)
	PGM5	-3.00658	-2.71873	-1.6394	-2.39745	-2.1485						-2.12187	-0.0501503	-0.738403	0.526518	-0.0530418						-1.43476	2	Phosphoglucomutase-like protein 5 OS=Homo sapiens OX=9606 GN=PGM5 PE=1 SV=2	N-Term(TMT6plex); K16(TMT6plex); [Y]18(Phospho); K22(TMT6plex)
	LMO7																-0.865119	-2.15475	-0.992895	-1.33434	-2.03347	-1.47612	1	LIM domain only protein 7 OS=Homo sapiens OX=9606 GN=LMO7 PE=1 SV=3	N-Term(TMT6plex); [Y]9(Phospho); K13(TMT6plex)
	CNN1	-3.74536	-2.86221	-1.08486	-2.86591	-3.38017	1.04103	0.422291	0.512679	1.63822	1.36833	-1.86742	-2.35986	-0.212567	-4.68039	-4.20381						-1.48533	3	Calponin-1 OS=Homo sapiens OX=9606 GN=CNN1 PE=1 SV=2	N-Term(TMT6plex); [Y]5(Phospho)
	MYH11	-2.2396	-3.22649	1.45624	-0.504332	-0.156601	-0.285431	-0.536552	0.212117	-0.340454	-0.0244413	-3.40412	-1.93466	0.177794	-1.98341	-3.00821	-3.51982	-4.27875	-1.90943	-2.11738	-2.12228	-1.48729	4	Myosin-11 OS=Homo sapiens OX=9606 GN=MYH11 PE=1 SV=3	N-Term(TMT6plex); [Y]9(Phospho); K12(TMT6plex)
	MYH11	-1.81763	-2.40877	-0.121666	-1.52569	-0.22565						-3.7135	-1.37899	-0.916017	-1.27218	-2.156						-1.55361	2	Myosin-11 OS=Homo sapiens OX=9606 GN=MYH11 PE=1 SV=3	N-Term(TMT6plex); K3(TMT6plex); [Y]12(Phospho); K15(TMT6plex)
	HIST1H4A	-0.70512	-1.78374	0.189458	-0.587798	-0.230131											-2.47668	-2.09174	-4.29486	-3.18366	-0.5	-1.56643	2	Histone H4 OS=Homo sapiens OX=9606 GN=HIST1H4A PE=1 SV=2	N-Term(TMT6plex); [Y]9(Phospho); K12(TMT6plex)
	EPHB3						-2.16884	-2.06151	-1.13078	-0.587139	-2.07384											-1.60442	1	Ephrin type-B receptor 3 OS=Homo sapiens OX=9606 GN=EPHB3 PE=1 SV=2	N-Term(TMT6plex); [Y]4(Phospho); K10(TMT6plex)
	SELENBP1	-2.16884	-2.06151	-1.13078	-0.587139	-2.07384																-1.60442	1	Methanethiol oxidase OS=Homo sapiens OX=9606 GN=SELENBP1 PE=1 SV=2	N-Term(TMT6plex); [Y]2(Phospho); K3(TMT6plex); K13(TMT6plex)
	ALDH1A1	-2.11566	-2.03657	-1.98532	0.632836	-2.91847																-1.68464	1	Retinal dehydrogenase 1 OS=Homo sapiens OX=9606 GN=ALDH1A1 PE=1 SV=2	N-Term(TMT6plex); [Y]6(Phospho); K15(TMT6plex)
	ISOC1	-1.58547	-1.94302	-2.10015	-1.21956	-1.6693																-1.7035	1	Isochorismatase domain-containing protein 1 OS=Homo sapiens OX=9606 GN=ISOC1 PE=1 SV=3	N-Term(TMT6plex); [Y]12(Phospho); K14(TMT6plex)
	ANXA5	-1.61781	-1.82087	-0.311263	-1.30485	-1.71318											-1.79979	-3.07242	-1.88766	-2.03937	-2.11304	-1.76802	2	Annexin A5 OS=Homo sapiens OX=9606 GN=ANXA5 PE=1 SV=2	N-Term(TMT6plex); [Y]5(Phospho); K8(TMT6plex); K12(TMT6plex)
	MYH10	-2.89238	-3.68899	-0.604128	-1.22018	-1.20251	-2.52931	-2.85166	-2.42453	-1.74679	-2.3381	-2.66757	-0.610174	0.26072	-1.07516	-1.96812						-1.83726	3	Myosin-10 OS=Homo sapiens OX=9606 GN=MYH10 PE=1 SV=3; Myosin-11 OS=Homo sapiens OX=9606 GN=MYH11 PE=1 SV=3	N-Term(TMT6plex); [Y]9(Phospho)
	SHC1																-0.915387	-1.81909	-0.683707	-2.24047	-3.74144	-1.88002	1	SHC-transforming protein 1 OS=Homo sapiens OX=9606 GN=SHC1 PE=1 SV=4	N-Term(TMT6plex); [Y]8(Phospho); K16(TMT6plex)
	ACTG2											-3.21197	-1.87836	-1.91671	0.341299	-3.25439						-1.98403	1	Actin, gamma-enteric smooth muscle OS=Homo sapiens OX=9606 GN=ACTG2 PE=1 SV=1; Actin, aortic smooth muscle OS=Homo sapiens OX=9606 GN=ACTA2 PE=1 SV=1; Actin, alpha skeletal muscle OS=Homo sapiens OX=9606 GN=ACTA1 PE=1 SV=1; Actin, alpha cardiac muscle 1 OS=Homo sapiens OX=9606 GN=ACTC1 PE=1 SV=1	N-Term(TMT6plex); C2(Carbamidomethyl); [Y]3(Phospho); K23(TMT6plex)
	YWHAE	-1.89331	-2.26087	-1.38045	-1.3959	-2.31886						-2.84419	-1.38631	-0.635219	-1.77374	-2.62105	-1.9855	-3.70091	-1.96657	-2.23642	-1.48547	-1.99232	3	14-3-3 protein epsilon OS=Homo sapiens OX=9606 GN=YWHAE PE=1 SV=1	N-Term(TMT6plex); [Y]1(Phospho); K12(TMT6plex)
	MYH10	-1.90111	-3.58016	-1.60722	-2.06348	-1.56864																-2.14412	1	Myosin-10 OS=Homo sapiens OX=9606 GN=MYH10 PE=1 SV=3; Myosin-11 OS=Homo sapiens OX=9606 GN=MYH11 PE=1 SV=3	N-Term(TMT6plex); [Y]9(Phospho); K15(TMT6plex)
	PGM5	-1.92932	-2.28363	-1.1617	-2.08998	-1.91953											-1.87292	-3.3457	-2.79058	-3.25031	-2.0014	-2.26451	2	Phosphoglucomutase-like protein 5 OS=Homo sapiens OX=9606 GN=PGM5 PE=1 SV=2	N-Term(TMT6plex); K3(TMT6plex); [Y]7(Phospho)
	ANXA2P2	-1.63499	-1.37342	-1.93733	-2.0031	-2.19772											-3.7485	-1.89717	-2.57424	-3.33937	-2.53191	-2.32378	2	Putative annexin A2-like protein OS=Homo sapiens OX=9606 GN=ANXA2P2 PE=5 SV=2; Annexin A2 OS=Homo sapiens OX=9606 GN=ANXA2 PE=1 SV=2	N-Term(TMT6plex); [Y]5(Phospho); K11(TMT6plex); K16(TMT6plex)
	HSPA1A	-2.52931	-2.85166	-2.42453	-1.74679	-2.3381																-2.37808	1	Heat shock 70 kDa protein 1A OS=Homo sapiens OX=9606 GN=HSPA1A PE=1 SV=1; Heat shock 70 kDa protein 1-like OS=Homo sapiens OX=9606 GN=HSPA1L PE=1 SV=2	N-Term(TMT6plex); [Y]3(Phospho); K14(TMT6plex)
	NAXD	-2.94671	-3.37873	-1.87495	-3.10925	-2.18794																-2.69952	1	ATP-dependent (S)-NAD(P)H-hydrate dehydratase OS=Homo sapiens OX=9606 GN=NAXD PE=1 SV=1	ATP-dependent (S)-NAD(P)H-hydrate dehydratase OS=Homo sapiens OX=9606 GN=NAXD PE=1 SV=1

## Sheet: Labeling scheme
TMT10-label	Tissue Type	Analysis 1	Analysis 2	Analysis 3	Analysis 4
126	Normal	21CO007	05CO037	27CO004	05CO041
127C		11CO033	05CO034	20CO004	05CO029
127N		11CO032	01CO019	20CO003	01CO005
128C		11CO031	01CO014	14CO002	01CO006
128N		11CO030	01CO013	11CO036	01CO008
129C	Tumor	21CO007	05CO037	27CO004	05CO041
129N		11CO033	05CO034	20CO004	05CO029
130C		11CO032	01CO019	20CO003	01CO005
130N		11CO031	01CO014	14CO002	01CO006
131		11CO030	01CO013	11CO036	01CO008
