# Supplementary material for: High-Density, Targeted Monitoring of Tyrosine Phosphorylation Reveals Activated Signaling Networks in Human Tumors
Source: Oxford University Press journal article supplement (doi:10.1158/0008-5472.can-20-3804), 2021-01-28
Supplement: 00085472can203804-sup-255483_2_supp_6838243_qmsgw0.xlsx [file 00085472can203804-sup-255483_2_supp_6838243_qmsgw0.xlsx]

## Sheet: S4
Supplementary Table S4: Quantitative reproducibility comparison between SureQuant pTyr and DDA
Table 4.1	Light to heavy ratios of A549 cells stimulated with EGF.
Table 4.2	Integrated peak areas for label-free DDA analysis of 3 A549 replicate samples
Table 4.3	SureQuant pTyr replicate analysis of Tumor 32

## Sheet: Table 4.1
Table 4.1: Light to heavy ratios of A549 cells stimulated with EGF.
Values are light/heavy ratios of top 3 transitions for each peptide
		pTyr residue number	Analysis #				Associated files
Modified Sequence	Gene		1	2	3		Analysis #	Filename
ADY[+80]DTLSLR	PKP3	pY176	0.0034496	0.00352637	0.00271349		1	A549_1_pTyr_SQ.raw
AEDGSVIDY[+80]ELIDQDAR	ANXA2	pY188	0.000696589		0.000484009		2	A549_2_pTyr_SQ.raw
AEFAEY[+80]ASVDR	PAG1	pY227	0.000359104		0.000262168		3	A549_3_pTyr_SQ.raw
AGSLPNY[+80]ATINGK	TNS1	pY1404	0.00051323	0.000449822	0.000422361
ALDY[+80]YMLR	TLN1	pY70	0.0100519	0.0100602	0.00731944
ALELDPNLY[+80]R	MYH10	pY761	0.000170087	0.000372691	0.000197796
ALELDSNLY[+80]R	MYH9	pY754	0.00136839	0.00136863	0.00128515
ALPQNDDHY[+80]VMQEHR	TNK2	pY284	0.0024636	0.00389515	0.00205266
APTNEFY[+80]A	SDC4	pY197	0.000332569	0.000405117	0.000364147
APYTC[+57]GGDSDQY[+80]VLMSSPVGR	IRS2	pY823	0.00714944		0.00424787
AQQGLY[+80]QVPGPSPQFQSPPAK	BCAR1	pY128	0.00278925		0.00224226
AQY[+80]EDIANR	KRT75	pY327	0.00069465	0.000667005	0.000563808
AY[+80]TNFDAER	ANXA2P2	pY30	0.00195143	0.0019361	0.00149368
DASSQDC[+57]Y[+80]DIPR	GAB1	pY406	0.00317241	0.00396208	0.00291253
DGHPLSPERDHLEGLY[+80]AK	PARD3B	pY1000	0.00123543		0.000313214
DHLEGLY[+80]AK	PARD3B	pY1000	0.000375128	0.000356083	0.000319118
DLEY[+80]LDLK	PLEKHA7	pY665	0.00148411	0.00152351	0.00109025
DNEVDGQDY[+80]HFVVSR	DLG3	pY673	0.000329636		0.000224021
DQY[+80]LMWLTQK	PIK3R1	pY580	0.00108734		0.000876964
DSSTSPGDY[+80]VLSVSENSR	CRK	pY47	0.000598761	0.000803395	0.0005577
DSTY[+80]DLPR	GAB2	pY266	0.00132033	0.00123818	0.00117814
DVTIGGSAPIY[+80]VK	PARD3	pY489	0.00589354	0.00445101	0.00302389
DWSHY[+80]FK	KRT18	pY129	0.000233155	0.000280364	0.00018793
DY[+80]HFVTSR	DLG1	pY760	0.000417184	0.000428333	0.000439617
DY[+80]LIDGSR	VCL	pY107	0.00024268	0.000374735	0.000202181
DY[+80]STLTSVSSHDSR	ITGB4	pY1510	0.000141219	0.000242813	0.000425018
EAAY[+80]HPEVAPDVR	TLN1	pY2224	0.000167973	0.000212335	0.000148505
EATQPEPIY[+80]AESTK	PRAG1	pY413	0.00776939	0.00741375	0.00707818
EC[+57]DY[+80]SIDGINR	TLN2	pY1665	0.00129233	0.00165123	0.00143291
EEPEALY[+80]AAVNK	ITSN2	pY968	0.00121092	0.00146713	0.00107936
EEY[+80]DVLDK	CD247	pY83	0.000155159	0.000197398	0.000176306
EIDVSY[+80]VK	EPHB4	pY614	0.000690123	0.000876909	0.00103802
EIENLTQQY[+80]EEK	MYH11	pY1408	0.00189245		0.000284603
EKPAQDPLY[+80]DVPNASGGQAGGPQRPGR	RIN1	pY36	0.0129178		0.0116069
EQY[+80]DVPQEWR	MUC12	pY5413	0.000155605	0.000460915	0.000253355
ERDY[+80]AEIQDFHR	PARD3	pY1080	0.00251724	0.00239881	0.0018617
EVPIY[+80]ANR	ADAM9	pY769	0.00181155	0.00183097	0.00156101
EYDQLY[+80]EEYTR	PIK3R2	pY464	0.0314594	0.0397929	0.0195772
EYDRLY[+80]EEYTR	PIK3R1	pY467	0.000598237	0.000703797	0.000640611
FANY[+80]IDK	VIM	pY117	0.000530881	0.001123	0.000835653
FANY[+80]IEK	DES	pY122	0.000373229	0.00043173	0.000376146
FASEASGY[+80]QDNIAR	DES	pY363	7.96031e-05	8.49551e-05	8.49296e-05
FASQQGMTAY[+80]GTR	CNN1	pY182	0.000520623	0	0.000615265
FAVPTY[+80]AAK	ADAM9	pY778	0.00138517	0.00173147	0.00162111
FEEPAPLSY[+80]DSRPR	TJP1	pY1140	0.000176713	0.000184211	0.000161568
FHPEPY[+80]GLEDDQR	CTNND1	pY280	0.00155775	0.00183478	0.00150515
FLEDDPSDPTY[+80]TSSLGGK	EPHB3	pY792	0.000189317	0.000203135	0.000156584
FQKEIENLTQQY[+80]EEK	MYH11	pY1408	0.000512948		0.000278007
GAY[+80]SLSIR	YES1	pY194	0.00109994	0.000905924	0.000874396
GDY[+80]PLEAVR	PKM	pY370	0.00138491	0.000845439	0.00090796
GEPNVSY[+80]IC[+57]SR	GSK3A	pY279	2.50451	2.53364	2.11773
GGGPYDAPGGDDSY[+80]I	CDHR5	pY844	6.99003e-05	7.69861e-05	8.23375e-05
GHEY[+80]TNIK	PTPN11	pY546	0.00365575	0.00354052	0.00307599
GIVVY[+80]TGDR	ATP1A1	pY260	0.00331292	0.00446342	0.00330603
GLIDRDLY[+80]R	DSP	pY2159	0.0013965		0.000663113
GQEATDTEY[+80]SEIK	SIGLEC9	pY456	0.000157656	0.000291948	0.000193921
GQY[+80]HTLQAGFSSR	PKP3	pY84	0.00423625	0.00802641	0.00339379
GSTAENAEY[+80]LR	EGFR	pY1197	0.0272051	0.0286702	0.0250604
GVITDQNSDGY[+80]C[+57]QTGTMSR	DSP	pY56	0.00494054	0.00219357	0.00243523
GY[+80]FFLDER	PDLIM4	pY293	0.000632077	0.000602925	0.000447944
HADAEMTGY[+80]VVTR	MAPK13	pY182	0.000603958	0.000997324	0.000688175
HELQANC[+57]Y[+80]EEVKDR	CFL1	pY140	0.00760628	0.0083778	0.00278592
HFDTY[+80]HR	PKP2	pY217	0.000531473	0.000644607	0.000722556
HPAGVY[+80]QVSGLHNK	TNS1	pY1254	0.000322287	0.000341756	0.000314029
HPDIY[+80]AVPIK	TJP2	pY1118	0.000751812	0.000271554	0.000472112
HYEDGYPGGSDNY[+80]GSLSR	CTNND1	pY228	0.000801658	0.000705325	0.000410059
IGEGTY[+80]GVVYK	CDK2	pY15	0.391132	0.371109	0.357146
IGEGT[+80]Y[+80]GVVYK	CDK2	pT14;pY15	0.000512585	0.000386055	0.000284876
IGTAEPDY[+80]GALYEGR	PLCG1	pY771	0.00122847	0.00129033	0.00112728
IIQLLDDY[+80]PK	RPLP0	pY24	0.00117226	0.00180198	0.00081226
IQNTGDY[+80]YDLYGGEK	PTPN11	pY62	0.00212259	0.00253229	0.00218231
IYNGDY[+80]YR	AXL	pY702	0.00117538	0.00102524	0.00122838
IYQY[+80]IQSR	DYRK1B	pY273	0.332055	0.414998	0.244201
KNPQEGLY[+80]NELQK	CD247	pY111	0.000252935		0.000177126
KPTY[+80]DPVSEDQDPLSSDFKR	TNK2	pY518	0.00259814		0.00245714
LDNGGY[+80]YITTR	YES1	pY222	2.91557e-05	9.93482e-05	3.88128e-05
LEPQIASASEY[+80]AHR	PLIN3	pY95	0.000206584	0.00024149	0.000157038
LGEGTY[+80]ATVYK	CDK17	pY203	9.80943e-05	0.000105162	0.000115096
LGLDY[+80]EER	PHB2	pY128	2.20585e-05		1.98287e-05
LHEY[+80]NTQFQEK	PIK3R1	pY452	0.000159469	0.000185684	0.000153925
LIEDNEY[+80]TAR	LCK	pY394	0.00245588	0.0027013	0.00223809
LIY[+80]LVPEK	ITSN2	pY553	0.00168091	0.00174266	0.00139463
LLDDFDGTY[+80]ETQGGK	EPHA1	pY781	0.000126777		0.000190094
LPSSPVY[+80]EDAASFK	CTTN	pY421	0.00104591	0.00100219	0.000920655
LQQY[+80]IAPGMK	EPHB3	pY600	0.000178182		0.000184494
LSLEGDHSTPPSAY[+80]GSVK	ANXA2P2	pY24	0.00379903		0.00221972
LVNEAPVYSVY[+80]SK	STAM2	pY374	0.000902576	0.000777922	0.0011972
LYDAY[+80]ELK	ANXA5	pY94	0.000712577	0.000650017	0.000705767
LYGDADY[+80]LEER	CTPS1	pY473	0.000137317	0.000132018	9.87192e-05
LY[+80]AVVTR	LYN	pY306	0.0012544	0.000494775	0.000390285
LY[+80]EEYTR	PIK3R1	pY467	0.00129659	0.000895593	0.00106044
MAEAY[+80]SEIGMK	CD247	pY123	0.000125222		5.84222e-05
NLIY[+80]DNADNK	PKP3	pY390	0.00278761	0.00233132	0.00229026
NPGNQAAY[+80]EHFETMK	VCL	pY692	0.00708167	0.00219911	0.00739554
NPQEGLY[+80]NELQK	CD247	pY111	0.000157843	0.000217719	0.000180844
NQETY[+80]ETLKHEKPPQ	FCER1G	pY76		0.000186836	9.70648e-05
NY[+80]VTPVNR	GRB2	pY209	0.0086102	0.00912579	0.00819527
QADEEMTGY[+80]VATR	MAPK11	pY182	0.00305221	0.003524	0.00348823
QADSEMTGY[+80]VVTR	MAPK12	pY185	0.0180647	0.0105462	0.0136693
QEMMEY[+80]R	DES	pY324	0.000156596	3.99882e-05	0.000123383
QLLY[+80]SENK	FRK	pY132	0.00108193	0.00104356	0.00101553
QSPEDVY[+80]FSK	EPHA2	pY575	0.000743402		0.0136258
QYFEQY[+80]SR	TJP1	pY1195	0.00237877	0.000732205	0.00163162
REEPEALY[+80]AAVNK	ITSN2	pY968	0.000952828	0.00112209	0.00103425
RIEY[+80]IEAR	BRK1	pY63	0.00140174	0.00102718	0.00156357
RPAGSVQNPVY[+80]HNQPLNPAPSR	EGFR	pY1110	0.0193717	0.0400928	0.0120163
RPGPGTLY[+80]DVPR	BCAR1	pY387	0.0305883		0.00816523
SAEEAPLY[+80]SK	PTPN18	pY389	0.000143886	0.000113528	0.000121329
SDSASSEPVGIY[+80]QGFEK	PRKCD	pY313	0.000185895	0.000199217	0.000198676
SDVY[+80]SDLNTQRPYYK	TYROBP	pY102	0.000208833		0.000205019
SEDIY[+80]ADPAAYVMR	PLEKHA6	pY492	0.00108062		0.000722625
SFLDSGY[+80]R	VCL	pY822	0.124905	0.196142	0.0906752
SLDNGGYY[+80]ISPR	LYN	pY194	0.000100577	8.7845e-05	7.41448e-05
SLDNNY[+80]STPNER	CTNND1	pY904	0.000432379	0.000535338	0.000458818
SLYASSPGGVY[+80]ATR	VIM	pY61	0.00428345	0.00433013	0.00416087
SLY[+80]HDISGDTSGDYR	ANXA11	pY482	9.57569e-05		8.18599e-05
SLY[+80]SMIK	ANXA6	pY302	0.00108343	0.00126664	0.00110208
SNHY[+80]DPEEDEEYYR	TJP1	pY1346	0.00204681	0.00176573	0.00205567
SNHY[+80]DPEEDEEYYRK	TJP1	pY1346	0.000174426	0.00024297	0.000182829
SNY[+80]YDAYQAQPLATR	CLDN2	pY194	0.000308976	0.000344523	0.000188516
SQSSHSY[+80]DDSTLPLIDR	CTNND1	pY865	0.000721684		0.00143683
SREYDQLY[+80]EEYTR	PIK3R2	pY464	0.00103812		0.000724409
SSGSGSSVADERVDY[+80]VVVDQQK	GAB1	pY659	0.00437241	0.0124017	0.00911161
STTNY[+80]VDFYSTK	PKP4	pY1168	0.000357202	0.000299647	0.00019622
SYSPY[+80]DMLESIR	ANXA2P2	pY238	0.0595173		0.00686995
TAC[+57]TNFMMTPY[+80]VVTR	MAPK9	pY185	0.0104121		0.0017369
TAGTSFMMTPY[+80]VVTR	MAPK10	pY223	0.00813081		0.0132084
TASDTDSSY[+80]C[+57]IPTAGMSPSR	GAB1	pY373	0.000221323	0.00016935	0.000207749
TEELIY[+80]LSQK	ARHGEF5	pY1370	0.000160804	0.000144068	0.000140779
TMQFEPSTMVY[+80]DAC[+57]R	TLN1	pY26	0.0267513		0.0199275
TYVDPHTY[+80]EDPNQAVLK	EPHA2	pY594	0.0043345	0.0028522	0.00306155
TY[+80]DMLK	PKP2	pY108	0.00037183	0.000411822	0.000351863
TY[+80]VDPHTYEDPNQAVLK	EPHA2	pY588	0.00179695	0.00282443	0.00165968
VADPDHDHTGFLTEY[+80]VATR	MAPK1	pY187	1.28784		1.84977
VADPDHDHTGFLT[+80]EY[+80]VATR	MAPK1	pT185;pY187	0.0220484		0.00895005
VDY[+80]VVVDQQK	GAB1	pY659	0.0159067	0.0144965	0.0164945
VENC[+57]PDELY[+80]DIMK	LYN	pY473	0.000359455		0.000414847
VGEEEHVY[+80]SFPNK	PXN	pY118	0.0126408	0.0118914	0.0119904
VGFQY[+80]EGTYK	G6PD	pY503	0.00722351	0.00803075	0.00392867
VIEDNEY[+80]TAR	LYN	pY397	0.000505553	0.000414974	0.000396685
VIY[+80]DFIEK	WASL	pY256	0.000564566	0.000535076	0.000636999
VLEDDPEAAY[+80]TTR	EPHA4	pY779	0.00169022	0.0023522	0.000999195
VLEDDPEATY[+80]TTSGGK	EPHA2	pY772	0.00401405	0.0048947	0.0036668
VQIY[+80]HNPTANSFR	VASP	pY39	0.00100176	0.000725255	0.000699645
VSEKPSADY[+80]VLSVR	PTK6	pY114	0.000479249	0.003778	0.00208962
VTIADDY[+80]SDPFDAK	SHB	pY246	0.0005283	0.00055304	0.000489512
VTPPEGY[+80]EVVTVFPK	PDLIM1	pY321	0.00185629		0.00158699
VVY[+80]SAPR	CLDN3	pY198	0	0.000170745	0.00016763
VYTY[+80]IQSR	DYRK2	pY382	0.000971532	0.000814161	0.000628584
VY[+80]ENVGLMQQQK	PTPN11	pY584	0.00444718	0.0041782	0.00290588
WDTGENPIY[+80]K	ITGB1	pY783	0.00143198	0.00145519	0.00110453
WTAPEAALY[+80]GR	YES1	pY446	9.93343e-05	0.000132646	9.97249e-05
YC[+57]RPESQEHPEADPGSAAPY[+80]LK	STAT3	pY705	0.0296104	0.014707	0.0233601
YHGHSMSDPGVSY[+80]R	PDHA1	pY301	0.000123617	6.60748e-05	0.000117554
YIEDEDYY[+80]KASVTR	PTK2B	pY580	0.00107049	0.0021509	0.00139782
YTEFY[+80]HVPTHSDASK	PDLIM5	pY251	0.000149662	0.000197622	0.000169476
YVDSEGHLY[+80]TVPIR	CAV1	pY14	0.00426599	0.00500084	0.00234948
YVLDDEY[+80]TSSVGSK	BTK	pY551	0.000129983		0.000140375
YYGY[+80]TGAFR	LTF	pY547	0.00228269	0.00210412	0.00159114
Y[+80]AALSDQGLDIK	PALLD	pY1348	0.00035488	0.000379561	0.000377761
Y[+80]AAPELEIAR	SERINC5	pY345	0.000925059	0.00113538	0.00133952
Y[+80]ANVIAYDHSR	PTPRF	pY1381	0.000620311	0.00025021
Y[+80]ATPQVIQAPGPR	TNK2	pY827	0.00488847	0.00471633	0.00353788
Y[+80]LVIQGDER	EGFR	pY978	0.00152763	0.0012397	0.00177852
Y[+80]QQPFEDFR	PLCG1	pY1253	0.0129067	0.014674	0.0153931
Y[+80]VLDDQY[+80]TSSSGAK	TEC	pY513;pY519	0.000177235		0.00041644

## Sheet: Table 4.2
Table 4.2: Integrated peak areas for label-free DDA analysis of 3 A549 replicate samples
			Analysis #
Sequence	Modifications	Protein	1	2	3		Associated files
AASSSSVVPYLPR	1xPhospho [Y10]	Tyrosine-protein kinase ABL2 OS=Homo sapiens OX=9606 GN=ABL2 PE=1 SV=1	7802984	7.95482e+06	3.66405e+06		Analysis #	Filename
RHQSLSPNHPPPQLGQSVGSQNDAYDVPR	1xPhospho [Y25]	Enhancer of filamentation 1 OS=Homo sapiens OX=9606 GN=NEDD9 PE=1 SV=1	3003824	8.05782e+06	4586405		1	A549_pTyr_LF_DDA_1.raw
RIEYIEAR	1xPhospho [Y4]	Protein BRICK1 OS=Homo sapiens OX=9606 GN=BRK1 PE=1 SV=1	7.41643e+06	7.66462e+06	3.13173e+06		2	A549_pTyr_LF_DDA_2.raw
RLYYEGLQDK	1xPhospho [Y]	Hepatocyte growth factor-regulated tyrosine kinase substrate OS=Homo sapiens OX=9606 GN=HGS PE=1 SV=1	6.13679e+06	7.50107e+06	5524940		3	A549_pTyr_LF_DDA_3.raw
RPAGSVQNPVYHNQPLNPAPSR	1xPhospho [Y11]	Epidermal growth factor receptor OS=Homo sapiens OX=9606 GN=EGFR PE=1 SV=2	126399106	165718860	94211218
RPGPGTLYDVPR	1xPhospho [Y/T]	Breast cancer anti-estrogen resistance protein 1 OS=Homo sapiens OX=9606 GN=BCAR1 PE=1 SV=2	12887296	1.48242e+07	1.05947e+07
RPPGLEYCYNPSHNPEEQLSSK	1xCarbamidomethyl [C8]; 1xPhospho [Y]	Fibroblast growth factor receptor 1 OS=Homo sapiens OX=9606 GN=FGFR1 PE=1 SV=3	1.76502e+07	2.50091e+07	1.63328e+07
REEPEALYAAVNK	1xPhospho [Y8]	Intersectin-2 OS=Homo sapiens OX=9606 GN=ITSN2 PE=1 SV=3	8.32938e+06	16413721	10993878
RPVSFPETPYTVSPAGADR	1xPhospho [Y10]	Signal-induced proliferation-associated 1-like protein 3 OS=Homo sapiens OX=9606 GN=SIPA1L3 PE=1 SV=3	6.16186e+06	8626807	6823762
RVPCAYDK	1xCarbamidomethyl [C4]; 1xPhospho [Y6]	Crk-like protein OS=Homo sapiens OX=9606 GN=CRKL PE=1 SV=1	25711908	1.06257e+07	5.6166e+06
RVPNAYDK	1xPhospho [Y6]	Adapter molecule crk OS=Homo sapiens OX=9606 GN=CRK PE=1 SV=2	5174366	780542	522895
SAFSNLFGGEPLSYTR	1xPhospho [T/Y]	Transferrin receptor protein 1 OS=Homo sapiens OX=9606 GN=TFRC PE=1 SV=2	8391090	1.80402e+07	9431895
SAYGGPVGAGIR	1xPhospho [Y3]	Keratin, type II cytoskeletal 7 OS=Homo sapiens OX=9606 GN=KRT7 PE=1 SV=5	4.5683e+06	5136735	3.45786e+06
SDDYMPMSPASVSAPK	1xPhospho [Y4]	Insulin receptor substrate 2 OS=Homo sapiens OX=9606 GN=IRS2 PE=1 SV=2	1842205	4.07618e+06	2.21313e+06
SDPYHATSGALSPAK	1xPhospho [Y/S]	Gap junction alpha-1 protein OS=Homo sapiens OX=9606 GN=GJA1 PE=1 SV=2	1.28891e+06	1621792	1.15847e+06
RVGFQYEGTYK	1xPhospho [Y/T]	Glucose-6-phosphate 1-dehydrogenase OS=Homo sapiens OX=9606 GN=G6PD PE=1 SV=4	35845402	37300176	25576116
RDNEVDGQDYHFVVSR	1xPhospho [Y10]	Disks large homolog 3 OS=Homo sapiens OX=9606 GN=DLG3 PE=1 SV=2	9404240	13465550	6.628e+06
RAEDGSVIDYELIDQDAR	1xPhospho [Y10]	Annexin A2 OS=Homo sapiens OX=9606 GN=ANXA2 PE=1 SV=2	3252847	5098966	3.45858e+06
QYFEQYSR	1xPhospho [Y2]	Tight junction protein ZO-1 OS=Homo sapiens OX=9606 GN=TJP1 PE=1 SV=3	3.09197e+06	2402646	1.76229e+06
QHPTYKDDADLVELK	1xPhospho [Y5]	Synaptojanin-2 OS=Homo sapiens OX=9606 GN=SYNJ2 PE=1 SV=3	1.6682e+06	1.7097e+06	1.68156e+06
QHPTYKDDADLVELKR	1xPhospho [Y5]	Synaptojanin-2 OS=Homo sapiens OX=9606 GN=SYNJ2 PE=1 SV=3	2.15607e+06	3.135e+06	1.996e+06
QLIIEDPYYGNDSDFETVYQQCVR	1xCarbamidomethyl [C22]; 1xPhospho [Y/S/T]	Low molecular weight phosphotyrosine protein phosphatase OS=Homo sapiens OX=9606 GN=ACP1 PE=1 SV=3	7698150	19631624	7521424
QIYYSDKYDDEEFEYR	1xPhospho [Y/S]	Cyclin-dependent kinases regulatory subunit 1 OS=Homo sapiens OX=9606 GN=CKS1B PE=1 SV=1	9.25563e+06	9210802	5379376
QIYYSDKYFDEHYEYR	1xPhospho [Y]	Cyclin-dependent kinases regulatory subunit 2 OS=Homo sapiens OX=9606 GN=CKS2 PE=1 SV=1	5.15457e+06	6.82916e+06	2.9451e+06
QNHLQADNFYQTV	1xPhospho [T/Y]	Cysteine-rich motor neuron 1 protein OS=Homo sapiens OX=9606 GN=CRIM1 PE=1 SV=1	3.25158e+07	3.36904e+07	2.49024e+07
QPSGSFSTPGSATYVR	1xPhospho [Y/T]	Signal-induced proliferation-associated 1-like protein 3 OS=Homo sapiens OX=9606 GN=SIPA1L3 PE=1 SV=3	2543541	1.99215e+06	1.16168e+06
QQGLASYDYVR	1xPhospho [Y7]	Plectin OS=Homo sapiens OX=9606 GN=PLEC PE=1 SV=3	2791531	2.98312e+06	1.73824e+06
QQQMVVAHQYSFAPDGEAR	1xPhospho [Y10]	Tensin-3 OS=Homo sapiens OX=9606 GN=TNS3 PE=1 SV=2	9581423	12042587	7.50878e+06
QQQMVVAHQYSFAPDGEAR	1xPhospho [Y10]; 1xOxidation [M4]	Tensin-3 OS=Homo sapiens OX=9606 GN=TNS3 PE=1 SV=2	5.05352e+06	3.91382e+06	3.07342e+06
QQSTTLSTLYPSTSSLLTNHQHEGR	1xPhospho [T/Y/S]	Signal transducing adapter molecule 1 OS=Homo sapiens OX=9606 GN=STAM PE=1 SV=3	246200656	360900528	211837208
QQSTTLSTLYPSTSSLLTNHQHEGRK	1xPhospho [T/Y]	Signal transducing adapter molecule 1 OS=Homo sapiens OX=9606 GN=STAM PE=1 SV=3	7471004	18553806	9817793
QSPEDVYFSK	1xPhospho [Y7]	Ephrin type-A receptor 2 OS=Homo sapiens OX=9606 GN=EPHA2 PE=1 SV=2	43758292	52702304	30595494
QTPSREYVDLER	1xPhospho [Y7]	Core-binding factor subunit beta OS=Homo sapiens OX=9606 GN=CBFB PE=1 SV=2	7.89993e+06	8.90019e+06	5.7254e+06
QVVESAYEVIK	1xPhospho [Y7]	L-lactate dehydrogenase A chain OS=Homo sapiens OX=9606 GN=LDHA PE=1 SV=2	135784800	143458560	101020480
SDYDGIGSR	1xPhospho [Y3]	ATP-dependent RNA helicase DDX3X OS=Homo sapiens OX=9606 GN=DDX3X PE=1 SV=3	1.00782e+07	3.4996e+06	2297350
QHHDEYEDEIR	1xPhospho [Y6]	Carboxypeptidase D OS=Homo sapiens OX=9606 GN=CPD PE=1 SV=2	3.52555e+06	1.70326e+06	1.02218e+06
SEDSTIYDLLKDPVSLR	1xPhospho [Y7]	Rho guanine nucleotide exchange factor 10 OS=Homo sapiens OX=9606 GN=ARHGEF10 PE=1 SV=4	733096	3.01336e+06	1.09962e+06
SELPYEELWLEEGKPSHQPLTR	1xPhospho [Y5]	GRB2-associated and regulator of MAPK protein 1 OS=Homo sapiens OX=9606 GN=GAREM1 PE=1 SV=2	4.71016e+07	93046638	54124807
SNDKVYENVTGLVK	1xPhospho [Y6]	Focal adhesion kinase 1 OS=Homo sapiens OX=9606 GN=PTK2 PE=1 SV=2	9459365	1.09929e+07	8.06158e+06
SPFEVYVDK	1xPhospho [Y6]	Filamin-A OS=Homo sapiens OX=9606 GN=FLNA PE=1 SV=4	3.09982e+06	2.69075e+06	1.50825e+06
SPSQDNTDSYFR	1xPhospho [Y10]	Ras GTPase-activating protein nGAP OS=Homo sapiens OX=9606 GN=RASAL2 PE=1 SV=2	1362057	1.23884e+06	1.1617e+06
SQYHDLQAPDNQQTK	1xPhospho [Y3]	SH2 domain-containing protein 4A OS=Homo sapiens OX=9606 GN=SH2D4A PE=1 SV=1	2.19233e+07	24224539	1.55575e+07
SQYYSTVGGSHPHSEQYPDLLPLEAR	1xPhospho [Y/S]	Dynamin-binding protein OS=Homo sapiens OX=9606 GN=DNMBP PE=1 SV=1	2.12303e+06	3.0116e+06	2.73811e+06
SRDPAYELLITGGTYA	1xPhospho [Y]	Tetraspanin-3 OS=Homo sapiens OX=9606 GN=TSPAN3 PE=2 SV=1	9.03905e+06	9.18604e+06	2661723
SIYYITGESK	1xPhospho [Y3]	Heat shock protein HSP 90-beta OS=Homo sapiens OX=9606 GN=HSP90AB1 PE=1 SV=4	4443099	5.02145e+06	3.39533e+06
SREYDQLYEEYTR	1xPhospho [Y]	Phosphatidylinositol 3-kinase regulatory subunit beta OS=Homo sapiens OX=9606 GN=PIK3R2 PE=1 SV=2	8.24199e+06	9.28169e+06	5.43924e+06
SSGSGSSVADERVDYVVVDQQK	1xPhospho [Y/S]	GRB2-associated-binding protein 1 OS=Homo sapiens OX=9606 GN=GAB1 PE=1 SV=2	26330720	30567356	20802202
SSSVGSSSSYPISPAVSR	1xPhospho [S/Y]	Plectin OS=Homo sapiens OX=9606 GN=PLEC PE=1 SV=3	1.34118e+07	1.20126e+07	1.31291e+07
SSTETCYSAIPK	1xCarbamidomethyl [C6]; 1xPhospho [Y/S]	Filamin-B OS=Homo sapiens OX=9606 GN=FLNB PE=1 SV=2	6685075	6895354	4.24577e+06
STCIYGGAPK	1xCarbamidomethyl [C3]; 1xPhospho [Y5]	Probable ATP-dependent RNA helicase DDX17 OS=Homo sapiens OX=9606 GN=DDX17 PE=1 SV=2	5738203	1.8349e+06	2.20216e+06
STSSPYHAGNLLQR	1xPhospho [Y6]	Inactive tyrosine-protein kinase PEAK1 OS=Homo sapiens OX=9606 GN=PEAK1 PE=1 SV=4	1.90862e+07	20828327	1.23629e+07
STTTGHLIYK	1xPhospho [Y9]	Elongation factor 1-alpha 2 OS=Homo sapiens OX=9606 GN=EEF1A2 PE=1 SV=1;Elongation factor 1-alpha 1 OS=Homo sapiens OX=9606 GN=EEF1A1 PE=1 SV=1	4.28468e+07	5.52104e+07	3.4222e+07
SREYDRLYEEYTR	1xPhospho [Y8]	Phosphatidylinositol 3-kinase regulatory subunit alpha OS=Homo sapiens OX=9606 GN=PIK3R1 PE=1 SV=2	3.63841e+06	4.40758e+06	2707501
SLYVAEYHSEPVEDEKP	1xPhospho [Y/S]	Probable ATP-dependent RNA helicase DDX6 OS=Homo sapiens OX=9606 GN=DDX6 PE=1 SV=2	17422568	1.76714e+07	1.10098e+07
SLYPSSEIQLNNK	1xPhospho [Y3]	Signal transducing adapter molecule 2 OS=Homo sapiens OX=9606 GN=STAM2 PE=1 SV=1	154575424	159414304	1.09898e+08
SLYASSPGGVYATR	1xPhospho [T/Y]	Vimentin OS=Homo sapiens OX=9606 GN=VIM PE=1 SV=4	33547191	35916979	21001687
SEPEPVYIDEDKMDR	1xPhospho [Y7]	Signal transducing adapter molecule 2 OS=Homo sapiens OX=9606 GN=STAM2 PE=1 SV=1	2.21162e+06	4873946	2.44044e+06
SEQLKPLKTYVDPHTYEDPNQAVLK	1xPhospho [Y10]	Ephrin type-A receptor 2 OS=Homo sapiens OX=9606 GN=EPHA2 PE=1 SV=2	13545543	18675088	10499641
SESVVYADIR	1xPhospho [Y/S]	Myelin protein zero-like protein 1 OS=Homo sapiens OX=9606 GN=MPZL1 PE=1 SV=1	46149864	34878268	23138342
SFTPDHVVYAR	1xPhospho [Y9]	Caveolae-associated protein 1 OS=Homo sapiens OX=9606 GN=CAVIN1 PE=1 SV=1	1.08141e+07	1.65221e+07	8.25347e+06
SGLSSPIYIDLR	1xPhospho [Y8]	Uridine 5'-monophosphate synthase OS=Homo sapiens OX=9606 GN=UMPS PE=1 SV=1	1.56729e+06	4.59898e+06	2205957
SGRDYSTVSASPTALSTLK	1xPhospho [T/Y/S]	Rho guanine nucleotide exchange factor 5 OS=Homo sapiens OX=9606 GN=ARHGEF5 PE=1 SV=3	1.72237e+06	1.6552e+06	1.09165e+06
SHRDPYATSVGHLIEK	1xPhospho [Y6]	TOM1-like protein 1 OS=Homo sapiens OX=9606 GN=TOM1L1 PE=1 SV=2	9.53108e+06	1.75399e+07	1.19372e+07
SHYADVDPENQNFLLESNLGK	1xPhospho [Y3]	Sodium-coupled neutral amino acid transporter 2 OS=Homo sapiens OX=9606 GN=SLC38A2 PE=1 SV=2	9.81736e+07	1.63612e+08	89321872
SKPPYTDYVSTR	1xPhospho [Y/T]	Serine/threonine-protein kinase ICK OS=Homo sapiens OX=9606 GN=CILK1 PE=1 SV=1	37687192	38805469	28796321
SKPPYTDYVSTR	2xPhospho [T6; Y8]	Serine/threonine-protein kinase ICK OS=Homo sapiens OX=9606 GN=CILK1 PE=1 SV=1	44221972	52246902	28124241
SLEDPYSQQIR	1xPhospho [Y6]	Integrator complex subunit 7 OS=Homo sapiens OX=9606 GN=INTS7 PE=1 SV=1	1.93489e+06	2.25478e+06	1.45109e+06
SLEQYDQVLDGAHGASLTDLANLSEGVSLAER	1xPhospho [Y/T/S]	Epidermal growth factor receptor substrate 15-like 1 OS=Homo sapiens OX=9606 GN=EPS15L1 PE=1 SV=1	6.74197e+06	14116105	9.22578e+06
SLPSGSHQGPVIYAQLDHSGGHHSDK	1xPhospho [Y/S]	Myelin protein zero-like protein 1 OS=Homo sapiens OX=9606 GN=MPZL1 PE=1 SV=1	24355928	47106544	27150777
SLSSSSIGSNSTYLTSK	1xPhospho [Y13]	Adhesion G-protein coupled receptor G6 OS=Homo sapiens OX=9606 GN=ADGRG6 PE=1 SV=3	3.32967e+06	3.55325e+06	2.47215e+06
SLTETELTKPNYLYLLPTEK	1xPhospho [Y]	Oncostatin-M-specific receptor subunit beta OS=Homo sapiens OX=9606 GN=OSMR PE=1 SV=1	3.49772e+06	7933067	4.29878e+06
SEGTYCCGPVPVR	2xCarbamidomethyl [C6; C7]; 1xPhospho [Y5]	Protein-glutamine gamma-glutamyltransferase 2 OS=Homo sapiens OX=9606 GN=TGM2 PE=1 SV=2	3.92006e+06	4.88085e+06	2.74301e+06
QGTYGGYFR	1xPhospho [Y/T]	Eukaryotic translation initiation factor 3 subunit C OS=Homo sapiens OX=9606 GN=EIF3C PE=1 SV=1	1098433	2.19185e+06	1.59116e+06
QFYINVER	1xPhospho [Y3]	Eukaryotic initiation factor 4A-I OS=Homo sapiens OX=9606 GN=EIF4A1 PE=1 SV=1	1.89335e+06	3.62148e+06	1.6761e+06
QEYLEVQR	1xPhospho [Y3]	Hepatocyte growth factor-regulated tyrosine kinase substrate OS=Homo sapiens OX=9606 GN=HGS PE=1 SV=1	26282236	28838192	17292036
MAGFDGSAWDEEEEEPPDHQYYNDFPGKEPPLGGVVDMR	1xPhospho [Y/S]	SHC-transforming protein 1 OS=Homo sapiens OX=9606 GN=SHC1 PE=1 SV=4	23698996	264102009	98994840
MAGFDGSAWDEEEEEPPDHQYYNDFPGKEPPLGGVVDMR	1xPhospho [S/Y]; 1xOxidation [M]	SHC-transforming protein 1 OS=Homo sapiens OX=9606 GN=SHC1 PE=1 SV=4	57500360	378349248	207633920
MAGFDGSAWDEEEEEPPDHQYYNDFPGKEPPLGGVVDMR	1xPhospho [S/Y]; 2xOxidation [M1; M38]	SHC-transforming protein 1 OS=Homo sapiens OX=9606 GN=SHC1 PE=1 SV=4	39694548	116211944	88372928
MKGDYDVTVPK	1xPhospho [Y5]	Neuroblast differentiation-associated protein AHNAK OS=Homo sapiens OX=9606 GN=AHNAK PE=1 SV=2	1.75051e+06	2.65988e+06	1.66579e+06
MPEQEYEFPEPR	1xPhospho [Y6]	Anthrax toxin receptor 1 OS=Homo sapiens OX=9606 GN=ANTXR1 PE=1 SV=2	5.37478e+06	9.81086e+06	5.55923e+06
MQNHGYENPTYK	1xPhospho [Y11]	Amyloid-like protein 2 OS=Homo sapiens OX=9606 GN=APLP2 PE=1 SV=2	7.01781e+06	7.45411e+06	4.53244e+06
MAGFDGSAWDEEEEEPPDHQYYNDFPGK	1xPhospho [S/Y]; 1xOxidation [M1]	SHC-transforming protein 1 OS=Homo sapiens OX=9606 GN=SHC1 PE=1 SV=4	75292328	131231840	76243440
MQQNGYENPTYK	1xPhospho [Y]	Amyloid-beta precursor protein OS=Homo sapiens OX=9606 GN=APP PE=1 SV=3	3.89737e+06	3.17514e+06	1.91927e+06
MVVESAYEVIK	1xPhospho [Y7]; 1xOxidation [M1]	L-lactate dehydrogenase B chain OS=Homo sapiens OX=9606 GN=LDHB PE=1 SV=2	19399170	21560926	19278754
NAIKVPIVINPNAYDNLAIYK	1xPhospho [Y14]	Inactive tyrosine-protein kinase PEAK1 OS=Homo sapiens OX=9606 GN=PEAK1 PE=1 SV=4	1914482	8520068	3940769
NDSDPTYGQQGHPNTWK	1xPhospho [Y/T]	Lipoma-preferred partner OS=Homo sapiens OX=9606 GN=LPP PE=1 SV=1	8351965	8.32167e+06	5467435
NEEENIYSVPHDSTQGK	1xPhospho [Y/S]	Rho GTPase-activating protein 35 OS=Homo sapiens OX=9606 GN=ARHGAP35 PE=1 SV=3	168573376	199391322	131023752
NETEDQYALMEDEDDLPHHEER	1xPhospho [Y/T]	Phosphatidylinositol 3-kinase regulatory subunit beta OS=Homo sapiens OX=9606 GN=PIK3R2 PE=1 SV=2	7.89065e+06	1.75733e+07	8.36975e+06
NETEDQYALMEDEDDLPHHEER	1xPhospho [T/Y]; 1xOxidation [M10]	Phosphatidylinositol 3-kinase regulatory subunit beta OS=Homo sapiens OX=9606 GN=PIK3R2 PE=1 SV=2	7.1886e+06	7.18744e+06	4.00786e+06
MVVESAYEVIK	1xPhospho [Y7]	L-lactate dehydrogenase B chain OS=Homo sapiens OX=9606 GN=LDHB PE=1 SV=2	25263314	40263544	19054294
MAGFDGSAWDEEEEEPPDHQYYNDFPGK	1xPhospho [Y]	SHC-transforming protein 1 OS=Homo sapiens OX=9606 GN=SHC1 PE=1 SV=4	52715344	157045521	6.32231e+07
LYVSSESR	1xPhospho [Y2]	Tyrosine-protein kinase ABL1 OS=Homo sapiens OX=9606 GN=ABL1 PE=1 SV=4	4.31357e+06	1.19523e+06	696710
IYVDDGLISLQVK	1xPhospho [Y2]	Pyruvate kinase PKM OS=Homo sapiens OX=9606 GN=PKM PE=1 SV=4	6.72063e+06	20008844	2.04495e+06
LVSSPCCIVTSTYGWTANMER	2xCarbamidomethyl [C6; C7]; 1xPhospho [Y13]	Heat shock protein HSP 90-beta OS=Homo sapiens OX=9606 GN=HSP90AB1 PE=1 SV=4	2.57197e+06	8639404	2.49741e+06
LVTSPCCIVTSTYGWTANMER	2xCarbamidomethyl [C6; C7]; 1xPhospho [Y13]	Heat shock protein HSP 90-alpha OS=Homo sapiens OX=9606 GN=HSP90AA1 PE=1 SV=5	1.85292e+06	6.35633e+06	1.57882e+06
IWHHTFYNELR	1xPhospho [Y7]	Actin, cytoplasmic 1 OS=Homo sapiens OX=9606 GN=ACTB PE=1 SV=1;Actin, alpha cardiac muscle 1 OS=Homo sapiens OX=9606 GN=ACTC1 PE=1 SV=1	25807010	38644224	26466176
IYDLNIPAFVK	1xPhospho [Y2]	Cytoplasmic protein NCK2 OS=Homo sapiens OX=9606 GN=NCK2 PE=1 SV=2	2.83423e+06	4646052	2.68534e+06
LYDLNMPAYVK	1xPhospho [Y]	Cytoplasmic protein NCK1 OS=Homo sapiens OX=9606 GN=NCK1 PE=1 SV=1	30494076	56098636	30415420
LYDLNMPAYVK	1xPhospho [Y2]; 1xOxidation [M6]	Cytoplasmic protein NCK1 OS=Homo sapiens OX=9606 GN=NCK1 PE=1 SV=1	16147888	11455541	9670843
YYTPTISR	1xPhospho [Y1]	Proteasome subunit beta type-2 OS=Homo sapiens OX=9606 GN=PSMB2 PE=1 SV=1	1.87078e+06	2.17458e+06	1312495
IYESIEEAK	1xPhospho [Y2]	Rho-associated protein kinase 2 OS=Homo sapiens OX=9606 GN=ROCK2 PE=1 SV=4	3.33873e+06	3.92037e+06	4.10961e+06
LYEWISIDKDEAGAK	1xPhospho [Y2]	Phosphatidylinositol 3,4,5-trisphosphate 5-phosphatase 2 OS=Homo sapiens OX=9606 GN=INPPL1 PE=1 SV=2	2.7071e+07	54202482	3.70417e+07
IYGISFPDPK	1xPhospho [Y2]	Threonine--tRNA ligase 1, cytoplasmic OS=Homo sapiens OX=9606 GN=TARS1 PE=1 SV=3	4348337	6.36855e+06	3.62309e+06
LYPELSQYMGLSLNEEEIR	1xPhospho [Y]	Syntenin-1 OS=Homo sapiens OX=9606 GN=SDCBP PE=1 SV=1	5362600	18153605	7.31878e+06
LYPELSQYMGLSLNEEEIR	1xPhospho [Y/S]; 1xOxidation [M9]	Syntenin-1 OS=Homo sapiens OX=9606 GN=SDCBP PE=1 SV=1	1.00845e+06	1.49994e+06	1.82895e+06
LYQVPNPQAAPR	1xPhospho [Y2]	Enhancer of filamentation 1 OS=Homo sapiens OX=9606 GN=NEDD9 PE=1 SV=1	1.64168e+07	1.85788e+07	1.32378e+07
IYQYIQSR	1xPhospho [Y4]	Dual specificity tyrosine-phosphorylation-regulated kinase 1A OS=Homo sapiens OX=9606 GN=DYRK1A PE=1 SV=2	3.80153e+09	4036671488	2732096581
IYSLSSQPIDHEGIK	1xPhospho [Y2]	Phosphofurin acidic cluster sorting protein 1 OS=Homo sapiens OX=9606 GN=PACS1 PE=1 SV=2	3.26238e+06	3.15734e+06	2.23504e+06
NFGSYVTHETK	1xPhospho [Y5]	Dynein light chain 1, cytoplasmic OS=Homo sapiens OX=9606 GN=DYNLL1 PE=1 SV=1	21232280	16522779	10826678
NGDVSQFPYVEFTGR	1xPhospho [Y9]	Transmembrane protein 106B OS=Homo sapiens OX=9606 GN=TMEM106B PE=1 SV=2	1.92777e+07	2.45367e+07	1.46231e+07
NKVDDYIKR	1xPhospho [Y6]	NEDD8-conjugating enzyme UBE2F OS=Homo sapiens OX=9606 GN=UBE2F PE=1 SV=1	8353270	1.03e+07	6.32614e+06
NKYEDEINKR	1xPhospho [Y3]	Keratin, type II cytoskeletal 1 OS=Homo sapiens OX=9606 GN=KRT1 PE=1 SV=6;Keratin, type II cytoskeletal 8 OS=Homo sapiens OX=9606 GN=KRT8 PE=1 SV=7	3327035	1.5573e+06	1.0302e+06
NSYVAGQYDDAASYQR	1xPhospho [Y8]	Glucose-6-phosphate 1-dehydrogenase OS=Homo sapiens OX=9606 GN=G6PD PE=1 SV=4	7.82348e+06	8687198	5.64738e+06
NTYNQTALDIVNQFTTSQASR	1xPhospho [Y/T]	Caskin-2 OS=Homo sapiens OX=9606 GN=CASKIN2 PE=1 SV=2	37449970	70942022	3.39281e+07
NVVHQLSVTLEDLYNGATR	1xPhospho [Y14]	DnaJ homolog subfamily A member 1 OS=Homo sapiens OX=9606 GN=DNAJA1 PE=1 SV=2	1.2546e+06	7.32687e+06	3.09008e+06
NYGSYSTQASAAAATAELLK	1xPhospho [T/Y/S]	Secretory carrier-associated membrane protein 3 OS=Homo sapiens OX=9606 GN=SCAMP3 PE=1 SV=3	1.19145e+06	3878790	2.14875e+06
NYILDQTNVYGSAQR	1xPhospho [Y10]	Heterogeneous nuclear ribonucleoprotein U-like protein 1 OS=Homo sapiens OX=9606 GN=HNRNPUL1 PE=1 SV=2	3.02025e+06	2.1934e+06	1.09556e+06
NYVTPVNR	1xPhospho [Y2]	Growth factor receptor-bound protein 2 OS=Homo sapiens OX=9606 GN=GRB2 PE=1 SV=1	44461004	25552107	17019725
PLYEGLGSGGEK	1xPhospho [Y3]	Actin-related protein 10 OS=Homo sapiens OX=9606 GN=ACTR10 PE=1 SV=1	1.52852e+06	913449	829814
PPYTVVYFPVR	1xPhospho [Y7]	Glutathione S-transferase P OS=Homo sapiens OX=9606 GN=GSTP1 PE=1 SV=2	1.23643e+06	2.42887e+06	1.39337e+06
PYQYPALTPEQK	1xPhospho [Y]	Fructose-bisphosphate aldolase A OS=Homo sapiens OX=9606 GN=ALDOA PE=1 SV=2	16535520	1.72844e+07	1.08992e+07
QADSEMTGYVVTR	1xPhospho [Y9]; 1xOxidation [M6]	Mitogen-activated protein kinase 12 OS=Homo sapiens OX=9606 GN=MAPK12 PE=1 SV=3	6.20132e+06	3.80582e+06	2815573
QASEQNWANYSAEQNR	1xPhospho [Y10]	Gap junction alpha-1 protein OS=Homo sapiens OX=9606 GN=GJA1 PE=1 SV=2	3.76047e+06	5.26104e+06	2.91625e+06
QEDAPVVYLGSFR	1xPhospho [Y8]	Inactive tyrosine-protein kinase PRAG1 OS=Homo sapiens OX=9606 GN=PRAG1 PE=1 SV=4	1.40765e+07	18609889	1.14178e+07
QEEAEYVR	1xPhospho [Y6]	Adapter molecule crk OS=Homo sapiens OX=9606 GN=CRK PE=1 SV=2	100756460	48543409	26800661
QETEVELYNEFPEPIKLDK	1xPhospho [T/Y]	Ras-related protein Rab-7a OS=Homo sapiens OX=9606 GN=RAB7A PE=1 SV=1	1.03493e+06	2.93758e+06	1.56542e+06
QEVPSWLENMAYEHHYK	1xPhospho [Y12]	ATP-dependent RNA helicase DDX3X OS=Homo sapiens OX=9606 GN=DDX3X PE=1 SV=3	2260832	7763162	4.48479e+06
NSQEAEVSCPFIDNTYSCSGK	2xCarbamidomethyl [C9; C18]; 1xPhospho [Y16]	RanBP-type and C3HC4-type zinc finger-containing protein 1 OS=Homo sapiens OX=9606 GN=RBCK1 PE=1 SV=2	100257052	121698618	74461478
STVLQQQYNR	1xPhospho [Y8]	Talin-1 OS=Homo sapiens OX=9606 GN=TLN1 PE=1 SV=3	2831062	2.43485e+06	918970
NSNSYGIPEPAHAYAQPQTTTPLPAVSGSPGAAITPLPSTQNGPVFAK	2xPhospho [Y/T/S]	Crk-like protein OS=Homo sapiens OX=9606 GN=CRKL PE=1 SV=1	2.70496e+08	1033235379	4.62506e+08
NSFNNPAYYVLEGVPHQLLPPEPPSPAR	1xPhospho [Y]	Phosphatidylinositol 3,4,5-trisphosphate 5-phosphatase 2 OS=Homo sapiens OX=9606 GN=INPPL1 PE=1 SV=2	168970378	969914296	341898764
NLHDALSGHTSNNIYEAVK	1xPhospho [Y15]	Elongator complex protein 3 OS=Homo sapiens OX=9606 GN=ELP3 PE=1 SV=2	1.48388e+06	3.45701e+06	2.21189e+06
NLHYFNSDSFASHPNYPYSDEY	1xPhospho [S/Y]	Aldo-keto reductase family 1 member C3 OS=Homo sapiens OX=9606 GN=AKR1C3 PE=1 SV=4	12921003	28277900	13299884
NIILEEGKEILVGDVGQTVDDPYATFVK	1xPhospho [Y/T]	Cofilin-1 OS=Homo sapiens OX=9606 GN=CFL1 PE=1 SV=3	3851745	24657073	1.35312e+07
NLIYDNADNK	1xPhospho [Y4]	Plakophilin-3 OS=Homo sapiens OX=9606 GN=PKP3 PE=1 SV=1	2.53686e+06	1.95097e+06	1.21222e+06
NLQYYDISAK	1xPhospho [Y5]	GTP-binding nuclear protein Ran OS=Homo sapiens OX=9606 GN=RAN PE=1 SV=3	4.68474e+06	4248917	2.40759e+06
NLSEGNNANYTEYVATR	1xPhospho [T/Y]	Cyclin-dependent kinase-like 5 OS=Homo sapiens OX=9606 GN=CDKL5 PE=1 SV=1	5.00695e+06	3.75565e+06	2.91153e+06
NIVHNYSEAEIK	1xPhospho [Y/S]	Epsin-3 OS=Homo sapiens OX=9606 GN=EPN3 PE=2 SV=1	72072756	87276896	54545582
NIVNNYSEAEIK	1xPhospho [Y6]	Epsin-2 OS=Homo sapiens OX=9606 GN=EPN2 PE=1 SV=3	13843790	19045164	11284949
NMAEQIIQEIYSQIQSK	1xPhospho [Y11]; 1xOxidation [M2]	Transketolase OS=Homo sapiens OX=9606 GN=TKT PE=1 SV=3	4.12284e+06	24048898	9.57482e+06
NPGFYVEANPMPTFK	1xPhospho [Y5]	1-phosphatidylinositol 4,5-bisphosphate phosphodiesterase gamma-1 OS=Homo sapiens OX=9606 GN=PLCG1 PE=1 SV=1	1.25143e+07	3.08331e+07	1.62624e+07
NPGFYVEANPMPTFK	1xPhospho [Y5]; 1xOxidation [M11]	1-phosphatidylinositol 4,5-bisphosphate phosphodiesterase gamma-1 OS=Homo sapiens OX=9606 GN=PLCG1 PE=1 SV=1	7.9679e+06	7.40759e+06	4.52819e+06
NPGNQAAYEHFETMK	1xPhospho [Y8]	Vinculin OS=Homo sapiens OX=9606 GN=VCL PE=1 SV=4	5.88539e+07	95032644	64137238
NPGNQAAYEHFETMK	1xPhospho [Y8]; 1xOxidation [M14]	Vinculin OS=Homo sapiens OX=9606 GN=VCL PE=1 SV=4	3.33227e+07	2.65443e+07	1.8877e+07
NQDATVYVGGLDEK	1xPhospho [Y7]	Splicing factor 3B subunit 4 OS=Homo sapiens OX=9606 GN=SF3B4 PE=1 SV=1	4476773	4321616	2.14499e+06
NRPPFGQGYTQPGPGYR	1xPhospho [Y]	Protein TFG OS=Homo sapiens OX=9606 GN=TFG PE=1 SV=2	1.40151e+07	17196362	9.75069e+06
NSNSYGIPEPAHAYAQPQTTTPLPAVSGSPGAAITPLPSTQNGPVFAK	1xPhospho [Y/S/T]	Crk-like protein OS=Homo sapiens OX=9606 GN=CRKL PE=1 SV=1	2675817484	7151010816	3001327484
LVQSPNSYFMDVK	1xPhospho [Y8]	40S ribosomal protein S27 OS=Homo sapiens OX=9606 GN=RPS27 PE=1 SV=3	4721978	9186295	4882725
SVNESLNNLFITEEDYQALR	1xPhospho [Y16]	Clathrin heavy chain 1 OS=Homo sapiens OX=9606 GN=CLTC PE=1 SV=5	1.7961e+06	5549595	2.88178e+06
SVSSSPWLPQDGFDPSDYAEPMDAVVKPR	1xPhospho [Y/S]	Rho GTPase-activating protein 35 OS=Homo sapiens OX=9606 GN=ARHGAP35 PE=1 SV=3	9669997	42226200	20467168
VYNDGYDDDNYDYIVK	1xPhospho [Y11]	Dual specificity tyrosine-phosphorylation-regulated kinase 1A OS=Homo sapiens OX=9606 GN=DYRK1A PE=1 SV=2	3.89975e+06	6312331	2648519
VYSQITVQK	1xPhospho [Y2]	Epidermal growth factor receptor kinase substrate 8 OS=Homo sapiens OX=9606 GN=EPS8 PE=1 SV=1	6.04721e+06	5770894	3.91371e+06
VYTYIQSR	1xPhospho [T/Y]	Dual specificity tyrosine-phosphorylation-regulated kinase 2 OS=Homo sapiens OX=9606 GN=DYRK2 PE=1 SV=3	123231720	119052264	74939368
VYYVDHVEK	1xPhospho [Y2]	E3 ubiquitin-protein ligase Itchy homolog OS=Homo sapiens OX=9606 GN=ITCH PE=1 SV=2	3.31803e+06	5.16027e+06	3.67486e+06
WDSYENLSADGEVLHTQGPVDGSLYAK	1xPhospho [Y/S]	Tensin-3 OS=Homo sapiens OX=9606 GN=TNS3 PE=1 SV=2	2.80753e+06	9657719	7.89575e+06
WDSYENLSADGEVLHTQGPVDGSLYAK	2xPhospho [Y25; S]	Tensin-3 OS=Homo sapiens OX=9606 GN=TNS3 PE=1 SV=2	4.9797e+07	149726715	47931500
VYDSVQSSGPMVVTSLTEELKK	1xPhospho [Y2]	Suppressor of cytokine signaling 6 OS=Homo sapiens OX=9606 GN=SOCS6 PE=1 SV=2	976322	3.92612e+06	1.69044e+06
WDTGENPIYK	1xPhospho [Y9]	Integrin beta-1 OS=Homo sapiens OX=9606 GN=ITGB1 PE=1 SV=2	18475694	26017834	17515318
WKQYLEDER	1xPhospho [Y4]	CUE domain-containing protein 1 OS=Homo sapiens OX=9606 GN=CUEDC1 PE=1 SV=1	5702469	6.95956e+06	4.53701e+06
WPTVDASYYGGR	1xPhospho [Y]	Anthrax toxin receptor 1 OS=Homo sapiens OX=9606 GN=ANTXR1 PE=1 SV=2	5.22741e+06	8.51906e+06	4.66532e+06
YAAPELEIAR	1xPhospho [Y1]	Serine incorporator 5 OS=Homo sapiens OX=9606 GN=SERINC5 PE=2 SV=1	10662051	12227767	9075309
YADLPGIAR	1xPhospho [Y1]	Dynactin subunit 2 OS=Homo sapiens OX=9606 GN=DCTN2 PE=1 SV=4	3.27361e+06	3.81699e+06	2.45947e+06
YAFVNWINK	1xPhospho [Y1]	Plastin-3 OS=Homo sapiens OX=9606 GN=PLS3 PE=1 SV=4	850814	1.31327e+06	651134
YALYDATYETK	1xPhospho [Y/T]	Cofilin-1 OS=Homo sapiens OX=9606 GN=CFL1 PE=1 SV=3;Cofilin-2 OS=Homo sapiens OX=9606 GN=CFL2 PE=1 SV=1	2.75809e+06	1.63728e+06	1813323
WEDSAHKPQSLDTDDPATLYAVVENVPPLR	1xPhospho [Y/T]	Tumor necrosis factor receptor superfamily member 1A OS=Homo sapiens OX=9606 GN=TNFRSF1A PE=1 SV=1	4.07289e+06	12115399	7.02437e+06
VYAPASTLVDQPYANEGTVVVTER	1xPhospho [Y]	Desmoglein-2 OS=Homo sapiens OX=9606 GN=DSG2 PE=1 SV=2	1.86714e+06	3168120	2.40113e+06
VVYENAYGQFIGPHR	1xPhospho [Y]	Thioredoxin reductase 1, cytoplasmic OS=Homo sapiens OX=9606 GN=TXNRD1 PE=1 SV=3	2.75855e+07	3.35624e+07	2.22374e+07
VVQEYIDAFSDYANFK	1xPhospho [Y12]	Receptor-type tyrosine-protein phosphatase alpha OS=Homo sapiens OX=9606 GN=PTPRA PE=1 SV=3	5.98141e+06	15057485	6.31323e+06
VPIVINPNAYDNLAIYK	1xPhospho [Y]	Inactive tyrosine-protein kinase PEAK1 OS=Homo sapiens OX=9606 GN=PEAK1 PE=1 SV=4	8.75298e+07	1.44735e+08	7.31551e+07
VPNAYDKTALALEVGELVK	1xPhospho [Y/T]	Adapter molecule crk OS=Homo sapiens OX=9606 GN=CRK PE=1 SV=2	5.35776e+06	13751850	7708307
VPSEGAYDIILPR	1xPhospho [Y7]	G-protein coupled receptor family C group 5 member C OS=Homo sapiens OX=9606 GN=GPRC5C PE=1 SV=2	9826290	13916251	7.40684e+06
VQIYHNPTANSFR	1xPhospho [Y4]	Vasodilator-stimulated phosphoprotein OS=Homo sapiens OX=9606 GN=VASP PE=1 SV=3	1.58168e+07	1.5936e+07	9.19964e+06
VQPNEAVYTK	1xPhospho [T/Y]	Glucose-6-phosphate 1-dehydrogenase OS=Homo sapiens OX=9606 GN=G6PD PE=1 SV=4	150818608	64266956	41018806
VSEKPSADYVLSVR	1xPhospho [Y/S]	Protein-tyrosine kinase 6 OS=Homo sapiens OX=9606 GN=PTK6 PE=1 SV=1	4.09587e+06	4.22823e+06	2.03329e+06
VSLEEIYSGCTK	1xCarbamidomethyl [C10]; 1xPhospho [Y7]	DnaJ homolog subfamily B member 1 OS=Homo sapiens OX=9606 GN=DNAJB1 PE=1 SV=4	3210967	4665572	3.01714e+06
VSSTHYYLLPERPPYLDK	1xPhospho [T/Y/S]	ERBB receptor feedback inhibitor 1 OS=Homo sapiens OX=9606 GN=ERRFI1 PE=1 SV=1	337090354	607471164	346621020
VSSTHYYLLPERPSYLER	1xPhospho [Y/T]	Activated CDC42 kinase 1 OS=Homo sapiens OX=9606 GN=TNK2 PE=1 SV=3	1.32967e+08	312442836	1.40351e+08
VTASGPGLSSYGVPASLPVDFAIDAR	1xPhospho [S/T/Y]	Filamin-B OS=Homo sapiens OX=9606 GN=FLNB PE=1 SV=2	10076051	38142996	11936117
VTIADDYSDPFDAK	1xPhospho [Y7]	SH2 domain-containing adapter protein B OS=Homo sapiens OX=9606 GN=SHB PE=1 SV=2	6353555	6.95779e+06	3.84651e+06
VTPPEGYEVVTVFPK	1xPhospho [Y7]	PDZ and LIM domain protein 1 OS=Homo sapiens OX=9606 GN=PDLIM1 PE=1 SV=4	8.61872e+06	1.35776e+07	7.18791e+06
VTSPYWEER	1xPhospho [Y5]	Ubiquitin carboxyl-terminal hydrolase CYLD OS=Homo sapiens OX=9606 GN=CYLD PE=1 SV=1	2.76709e+06	5076748	1.95068e+06
VVAIYDYTK	1xPhospho [Y5]	Abl interactor 2 OS=Homo sapiens OX=9606 GN=ABI2 PE=1 SV=1;Abl interactor 1 OS=Homo sapiens OX=9606 GN=ABI1 PE=1 SV=4	6363097	8027249	4.78983e+06
VVQDTYQIMK	1xPhospho [Y6]	Hepatocyte growth factor-regulated tyrosine kinase substrate OS=Homo sapiens OX=9606 GN=HGS PE=1 SV=1	1786285	3.14184e+06	1.90773e+06
YATPQVIQAPGPR	1xPhospho [Y1]	Activated CDC42 kinase 1 OS=Homo sapiens OX=9606 GN=TNK2 PE=1 SV=3	3.07243e+07	2.62991e+07	1.8091e+07
VPCAYDKTALALEVGDIVK	1xCarbamidomethyl [C3]; 1xPhospho [Y/T]	Crk-like protein OS=Homo sapiens OX=9606 GN=CRKL PE=1 SV=1	3.14676e+06	10709667	5.68044e+06
YCRPESQEHPEADPGSAAPYLK	1xCarbamidomethyl [C2]; 1xPhospho [Y20]	Signal transducer and activator of transcription 3 OS=Homo sapiens OX=9606 GN=STAT3 PE=1 SV=2	349674104	453698440	290476568
YENVPLIGR	1xPhospho [Y1]	Protein tweety homolog 2 OS=Homo sapiens OX=9606 GN=TTYH2 PE=1 SV=3	1.33891e+06	1.45919e+06	943530
YNFHGTAEQDLPFCK	1xCarbamidomethyl [C14]; 1xPhospho [Y1]	Tyrosine-protein kinase CSK OS=Homo sapiens OX=9606 GN=CSK PE=1 SV=1	10983955	21978126	11897470
YQDVYVELSHIK	1xPhospho [Y5]	TRIO and F-actin-binding protein OS=Homo sapiens OX=9606 GN=TRIOBP PE=1 SV=3	1.50012e+06	2.38359e+06	1.50884e+06
YQEVWTSSTSPR	1xPhospho [Y1]	Inactive tyrosine-protein kinase PEAK1 OS=Homo sapiens OX=9606 GN=PEAK1 PE=1 SV=4	60413164	69535192	41705288
YQQPFEDFR	1xPhospho [Y1]	1-phosphatidylinositol 4,5-bisphosphate phosphodiesterase gamma-1 OS=Homo sapiens OX=9606 GN=PLCG1 PE=1 SV=1	7.12252e+06	6891558	4.10451e+06
YSFHPVEDFPAPEEYK	1xPhospho [Y/S]	WAS/WASL-interacting protein family member 2 OS=Homo sapiens OX=9606 GN=WIPF2 PE=1 SV=1	1.19657e+06	1.5512e+06	906117
YSFHPVEDFPAPEEYKHFQR	1xPhospho [Y15]	WAS/WASL-interacting protein family member 2 OS=Homo sapiens OX=9606 GN=WIPF2 PE=1 SV=1	6.2074e+06	13232389	7.49403e+06
YMEDSTYYK	1xPhospho [Y]; 1xOxidation [M2]	Focal adhesion kinase 1 OS=Homo sapiens OX=9606 GN=PTK2 PE=1 SV=2	87506452	45514035	33565446
YSSSEVNHLSPR	1xPhospho [Y1]	Discoidin, CUB and LCCL domain-containing protein 2 OS=Homo sapiens OX=9606 GN=DCBLD2 PE=1 SV=1	6195221	7.52652e+06	5.24041e+06
YTGYLCR	1xCarbamidomethyl [C6]; 1xPhospho [Y4]	PAX-interacting protein 1 OS=Homo sapiens OX=9606 GN=PAXIP1 PE=1 SV=2	3.03476e+06	2.67559e+06	668415
YVDSEGHLYTVPIR	1xPhospho [Y/T]	Caveolin-1 OS=Homo sapiens OX=9606 GN=CAV1 PE=1 SV=4	2.23043e+07	2.83827e+07	1.7381e+07
YVLCPSTTPSPAQPADR	1xCarbamidomethyl [C4]; 1xPhospho [Y1]	Tyrosine-protein kinase receptor UFO OS=Homo sapiens OX=9606 GN=AXL PE=1 SV=4	6.99712e+06	5418526	3.31346e+06
YVSLITSYQPFSLEK	1xPhospho [Y]	Interferon gamma receptor 1 OS=Homo sapiens OX=9606 GN=IFNGR1 PE=1 SV=1	1.36161e+06	5.39613e+06	3.71866e+06
YYEGYYAAGPGYGGR	1xPhospho [Y]	Lipoma-preferred partner OS=Homo sapiens OX=9606 GN=LPP PE=1 SV=1	2.11916e+06	2.30501e+06	1.23324e+06
YYGYTGAFR	1xPhospho [Y]	Lactotransferrin OS=Homo sapiens OX=9606 GN=LTF PE=1 SV=6	1.82359e+07	2.50107e+07	1.86004e+07
YSYYDESQGEIYR	1xPhospho [Y12]	Protein MEMO1 OS=Homo sapiens OX=9606 GN=MEMO1 PE=1 SV=1	2.72526e+06	3047588	1.85727e+06
YMEDSTYYK	1xPhospho [Y]	Focal adhesion kinase 1 OS=Homo sapiens OX=9606 GN=PTK2 PE=1 SV=2	190069743	1.70365e+08	1.03251e+08
YLYEIAR	1xPhospho [Y]	Albumin OS=Homo sapiens OX=9606 GN=ALB PE=1 SV=2	11317134	9.49593e+06	6.59178e+06
YIDQEELNK	1xPhospho [Y1]	Heat shock protein HSP 90-alpha OS=Homo sapiens OX=9606 GN=HSP90AA1 PE=1 SV=5;Heat shock protein HSP 90-beta OS=Homo sapiens OX=9606 GN=HSP90AB1 PE=1 SV=4	11464165	11625345	7.13052e+06
YESLTDPSK	1xPhospho [Y1]	Heat shock protein HSP 90-alpha OS=Homo sapiens OX=9606 GN=HSP90AA1 PE=1 SV=5;Heat shock protein HSP 90-beta OS=Homo sapiens OX=9606 GN=HSP90AB1 PE=1 SV=4	7014013	3712283	1.42016e+06
YFDEHYEYR	1xPhospho [Y6]	Cyclin-dependent kinases regulatory subunit 2 OS=Homo sapiens OX=9606 GN=CKS2 PE=1 SV=1	1.21051e+07	1.49517e+07	9117178
YFDSGDYNMAK	1xPhospho [Y]	Alpha-endosulfine OS=Homo sapiens OX=9606 GN=ENSA PE=1 SV=1	2580071	3910277	2.58731e+06
YFEITDESPYVHYLNTFSSK	1xPhospho [Y/S]	Coronin-1C OS=Homo sapiens OX=9606 GN=CORO1C PE=1 SV=1	9499474	24881028	13254500
YFSLKPEEK	1xPhospho [Y1]	CD2-associated protein OS=Homo sapiens OX=9606 GN=CD2AP PE=1 SV=1	41728996	4.95033e+07	32479605
YFSLKPEEKDEK	1xPhospho [Y1]	CD2-associated protein OS=Homo sapiens OX=9606 GN=CD2AP PE=1 SV=1	33189043	4.01173e+07	25585723
YGDVPCLDQTR	1xCarbamidomethyl [C6]; 1xPhospho [Y1]	Tyrosine-protein phosphatase non-receptor type 9 OS=Homo sapiens OX=9606 GN=PTPN9 PE=1 SV=1	2141696	2.12412e+06	1.28392e+06
YGEVFEPTVER	1xPhospho [Y1]	Tyrosine-protein kinase receptor UFO OS=Homo sapiens OX=9606 GN=AXL PE=1 SV=4	1.92726e+06	2194149	1.38563e+06
YGLFKEENPYAR	1xPhospho [Y10]	Pituitary tumor-transforming gene 1 protein-interacting protein OS=Homo sapiens OX=9606 GN=PTTG1IP PE=1 SV=1	5.28235e+06	3.27862e+06	2.03449e+06
YGMNPHQTPAQLYTLQPK	1xPhospho [Y1]	Bifunctional purine biosynthesis protein ATIC OS=Homo sapiens OX=9606 GN=ATIC PE=1 SV=3	1.72094e+06	3125367	1.81992e+06
YKDILPFDHSR	1xPhospho [Y1]	Tyrosine-protein phosphatase non-receptor type 12 OS=Homo sapiens OX=9606 GN=PTPN12 PE=1 SV=3	1.90748e+06	3831534	2399699
YKPVTNQVECHPYLTQEK	1xCarbamidomethyl [C10]; 1xPhospho [Y13]	Aldo-keto reductase family 1 member B10 OS=Homo sapiens OX=9606 GN=AKR1B10 PE=1 SV=2	4.32761e+06	5480888	3.23328e+06
YKYGYEIPVDMLCK	1xCarbamidomethyl [C13]; 1xPhospho [Y]	Proteasome subunit alpha type-6 OS=Homo sapiens OX=9606 GN=PSMA6 PE=1 SV=1	2283893	5.0881e+06	2.26997e+06
YICENQDSISSK	1xCarbamidomethyl [C3]; 1xPhospho [Y1]	Albumin OS=Homo sapiens OX=9606 GN=ALB PE=1 SV=2	3.11891e+06	2.25927e+06	1.25049e+06
YLDPEYIDR	1xPhospho [Y6]	Dynactin subunit 3 OS=Homo sapiens OX=9606 GN=DCTN3 PE=1 SV=1	2.79042e+06	2.38187e+06	1.86592e+06
YEELQSLAGK	1xPhospho [Y1]	Keratin, type II cytoskeletal 8 OS=Homo sapiens OX=9606 GN=KRT8 PE=1 SV=7	3.61621e+06	3.52909e+06	2.19678e+06
VMEGTVAAQDEFYR	1xPhospho [Y13]; 1xOxidation [M2]	Tyrosine-protein kinase CSK OS=Homo sapiens OX=9606 GN=CSK PE=1 SV=1	6544493	4357980	3.19503e+06
VMEGTVAAQDEFYR	1xPhospho [Y13]	Tyrosine-protein kinase CSK OS=Homo sapiens OX=9606 GN=CSK PE=1 SV=1	7.37151e+06	6.64735e+06	2.28102e+06
VIYDFIEK	1xPhospho [Y3]	Neural Wiskott-Aldrich syndrome protein OS=Homo sapiens OX=9606 GN=WASL PE=1 SV=2	39558644	46268492	28585104
TIDLGAAAHYTGDK	1xPhospho [Y/T]	Clathrin interactor 1 OS=Homo sapiens OX=9606 GN=CLINT1 PE=1 SV=1	5.42238e+06	7738585	4.92311e+06
TLEPVRPPVVPNDYVPSPTR	1xPhospho [Y14]	Abl interactor 2 OS=Homo sapiens OX=9606 GN=ABI2 PE=1 SV=1	4.11011e+06	4816684	3.3704e+06
TIPIDGNFFTYTR	1xPhospho [T/Y]	Retinal dehydrogenase 1 OS=Homo sapiens OX=9606 GN=ALDH1A1 PE=1 SV=2	11376737	20161008	9884854
TLSEVDYAPAGPAR	1xPhospho [Y/S]	Phosphatidylinositol 3,4,5-trisphosphate 5-phosphatase 2 OS=Homo sapiens OX=9606 GN=INPPL1 PE=1 SV=2	6188360	6.46934e+06	4.54818e+06
TLYDFPGNDAEDLPFK	1xPhospho [Y3]	Crk-like protein OS=Homo sapiens OX=9606 GN=CRKL PE=1 SV=1	10002819	16149274	11885077
TLYDFPGNDAEDLPFKK	1xPhospho [Y3]	Crk-like protein OS=Homo sapiens OX=9606 GN=CRKL PE=1 SV=1	9792365	13061400	6251014
TKPSDEEMLFIYGHYK	1xPhospho [Y12]	Acyl-CoA-binding protein OS=Homo sapiens OX=9606 GN=DBI PE=1 SV=2	1.73711e+06	4.41585e+06	3.05224e+06
TIYLSSPDSAVGVQWPR	1xPhospho [Y3]	Inactive tyrosine-protein kinase PRAG1 OS=Homo sapiens OX=9606 GN=PRAG1 PE=1 SV=4	3.2584e+06	9.35812e+06	4.16889e+06
TMQFEPSTMVYDACR	1xCarbamidomethyl [C14]; 1xPhospho [Y11]	Talin-1 OS=Homo sapiens OX=9606 GN=TLN1 PE=1 SV=3	5.02188e+06	21549728	5.09117e+06
TMQFEPSTMVYDACR	1xCarbamidomethyl [C14]; 1xPhospho [Y11]; 1xOxidation [M]	Talin-1 OS=Homo sapiens OX=9606 GN=TLN1 PE=1 SV=3	31031033	1.57792e+07	9.05318e+06
TPSFELPDASERPPTYCELVPR	1xCarbamidomethyl [C17]; 1xPhospho [Y/T]	SH2 domain-containing protein 3A OS=Homo sapiens OX=9606 GN=SH2D3A PE=1 SV=1	1.34888e+06	3.04773e+06	1.82631e+06
TPYEAYDPIGK	1xPhospho [Y]	Kin of IRRE-like protein 1 OS=Homo sapiens OX=9606 GN=KIRREL1 PE=1 SV=2	5671748	7.41153e+06	4.40256e+06
TQDQISNIKYHEEFEK	1xPhospho [Y10]	LIM and SH3 domain protein 1 OS=Homo sapiens OX=9606 GN=LASP1 PE=1 SV=2	3.94581e+06	5.99494e+06	3230499
TTDGVYEGVAIGGDR	1xPhospho [T/Y]	ATP-citrate synthase OS=Homo sapiens OX=9606 GN=ACLY PE=1 SV=3	14614501	5.16852e+06	1880948
TLYRIPEPQKPQLKPPEDIVR	1xPhospho [Y3]	Tight junction protein ZO-1 OS=Homo sapiens OX=9606 GN=TJP1 PE=1 SV=3	1.10603e+06	5480703	2.67399e+06
THAVSVSETDDYAEIIDEEDTYTMPSTR	1xPhospho [Y12]; 1xOxidation [M24]	Focal adhesion kinase 1 OS=Homo sapiens OX=9606 GN=PTK2 PE=1 SV=2	6.59313e+06	10756179	5.60959e+06
THAVSVSETDDYAEIIDEEDTYTMPSTR	1xPhospho [Y/T]	Focal adhesion kinase 1 OS=Homo sapiens OX=9606 GN=PTK2 PE=1 SV=2	7.57174e+06	17160412	5430655
TGPLPPGPPPEIVIYQELR	1xPhospho [Y15]	Prostaglandin reductase 1 OS=Homo sapiens OX=9606 GN=PTGR1 PE=1 SV=2	1.52751e+06	3.13335e+06	1.41621e+06
SVSSSPWLPQDGFDPSDYAEPMDAVVKPR	1xPhospho [S/Y]; 1xOxidation [M22]	Rho GTPase-activating protein 35 OS=Homo sapiens OX=9606 GN=ARHGAP35 PE=1 SV=3	4.63226e+06	7.94043e+06	2.90484e+06
SYDYDLIIIGGGSGGLAAAK	1xPhospho [Y4]	Thioredoxin reductase 1, cytoplasmic OS=Homo sapiens OX=9606 GN=TXNRD1 PE=1 SV=3	1.47593e+07	1.2998e+07	5.87914e+06
SYLPQTVR	1xPhospho [Y2]	Interleukin-6 receptor subunit beta OS=Homo sapiens OX=9606 GN=IL6ST PE=1 SV=2	4.71056e+06	6.20129e+06	4.02368e+06
SYSPYDMLESIR	1xPhospho [Y5]	Annexin A2 OS=Homo sapiens OX=9606 GN=ANXA2 PE=1 SV=2	18036962	39051260	18247072
SYSPYDMLESIRK	1xPhospho [Y5]	Annexin A2 OS=Homo sapiens OX=9606 GN=ANXA2 PE=1 SV=2	2.15086e+06	4.29109e+06	2.1337e+06
SYSSPDITQAIQEEEKR	1xPhospho [Y2]	Ubiquitin carboxyl-terminal hydrolase 8 OS=Homo sapiens OX=9606 GN=USP8 PE=1 SV=1	6968212	5851359	3.75861e+06
SYSSPDITQAIQEEEKR	2xPhospho [S/Y]	Ubiquitin carboxyl-terminal hydrolase 8 OS=Homo sapiens OX=9606 GN=USP8 PE=1 SV=1	5.21589e+06	6914266	4.51234e+06
TACTNFMMTPYVVTR	1xCarbamidomethyl [C3]; 1xPhospho [Y11]	Mitogen-activated protein kinase 9 OS=Homo sapiens OX=9606 GN=MAPK9 PE=1 SV=2	4.59164e+06	15032660	5.57061e+06
TACTNFMMTPYVVTR	1xCarbamidomethyl [C3]; 1xPhospho [Y11]; 1xOxidation [M]	Mitogen-activated protein kinase 9 OS=Homo sapiens OX=9606 GN=MAPK9 PE=1 SV=2	1.13717e+07	9.60072e+06	6.65646e+06
TAGTSFMMTPYVVTR	1xPhospho [T/Y]	Mitogen-activated protein kinase 8 OS=Homo sapiens OX=9606 GN=MAPK8 PE=1 SV=2	3.68826e+06	11474805	5172090
TAGTSFMMTPYVVTR	1xPhospho [Y11]; 1xOxidation [M7]	Mitogen-activated protein kinase 8 OS=Homo sapiens OX=9606 GN=MAPK8 PE=1 SV=2	10642954	16675348	8.15096e+06
TATESFASDPILYRPVAVALDTK	1xPhospho [Y13]	Pyruvate kinase PKM OS=Homo sapiens OX=9606 GN=PKM PE=1 SV=4	12548835	49580976	23375106
TDDYLDQPCYETINR	1xCarbamidomethyl [C9]; 1xPhospho [Y/T]	Rab GDP dissociation inhibitor beta OS=Homo sapiens OX=9606 GN=GDI2 PE=1 SV=2	4.07625e+06	4.79494e+06	2.4126e+06
TGFSTSPESPYTHWK	1xPhospho [Y/T]	Protein arginine N-methyltransferase 1 OS=Homo sapiens OX=9606 GN=PRMT1 PE=1 SV=3	7.42443e+06	10155855	5.91643e+06
TGHGYVYEYPSR	1xPhospho [Y]	Enhancer of filamentation 1 OS=Homo sapiens OX=9606 GN=NEDD9 PE=1 SV=1	2.59671e+07	30136833	1.84084e+07
TTDGVYEGVAIGGDRYPGSTFMDHVLR	1xPhospho [Y/T]	ATP-citrate synthase OS=Homo sapiens OX=9606 GN=ACLY PE=1 SV=3	1.70041e+06	1.71187e+07	8576923
TTEDEVHICHNQDGYSYPSR	1xCarbamidomethyl [C9]; 1xPhospho [Y15]	Low-density lipoprotein receptor OS=Homo sapiens OX=9606 GN=LDLR PE=1 SV=1	6146294	7.2739e+06	4.36708e+06
TTGIVMDSGDGVTHTVPIYEGYALPHAILR	1xPhospho [Y19]	Actin, cytoplasmic 1 OS=Homo sapiens OX=9606 GN=ACTB PE=1 SV=1	3.7438e+06	2.03225e+07	4.53714e+06
TTKSPSDSGYSYETIGK	1xPhospho [S/Y]	Microtubule-associated protein 1B OS=Homo sapiens OX=9606 GN=MAP1B PE=1 SV=2	1.9657e+06	2.09626e+06	2.11426e+06
VFNPYTEFK	1xPhospho [Y5]	EF-hand domain-containing protein D2 OS=Homo sapiens OX=9606 GN=EFHD2 PE=1 SV=1	1.91716e+06	2.30557e+06	1.49542e+06
VGEEEHVYSFPNK	1xPhospho [Y/S]	Paxillin OS=Homo sapiens OX=9606 GN=PXN PE=1 SV=3	437270864	509040784	336059960
VGFQYEGTYK	1xPhospho [Y/T]	Glucose-6-phosphate 1-dehydrogenase OS=Homo sapiens OX=9606 GN=G6PD PE=1 SV=4	316346496	322189896	208153352
VGYPAQVYK	1xPhospho [Y3]	Signal-induced proliferation-associated 1-like protein 3 OS=Homo sapiens OX=9606 GN=SIPA1L3 PE=1 SV=3	1268123	1.61179e+06	939224
VHPIPLESGGSSDVVLVSYVPSSQR	1xPhospho [S/Y]	SH2B adapter protein 1 OS=Homo sapiens OX=9606 GN=SH2B1 PE=1 SV=3	7655122	14978206	8489893
VHSPSGALEECYVTEIDQDK	1xCarbamidomethyl [C11]; 1xPhospho [Y12]	Filamin-A OS=Homo sapiens OX=9606 GN=FLNA PE=1 SV=4	4560311	8571229	4.29481e+06
VHSPSGALEECYVTEIDQDKYAVR	1xCarbamidomethyl [C11]; 1xPhospho [Y]	Filamin-A OS=Homo sapiens OX=9606 GN=FLNA PE=1 SV=4	7508612	1.71951e+07	1.13663e+07
VKGEYDVTVPK	1xPhospho [Y5]	Neuroblast differentiation-associated protein AHNAK OS=Homo sapiens OX=9606 GN=AHNAK PE=1 SV=2	9.95118e+06	1.2801e+07	7.71493e+06
VLEDDPEATYTTSGGK	1xPhospho [Y/T]	Ephrin type-A receptor 2 OS=Homo sapiens OX=9606 GN=EPHA2 PE=1 SV=2	3.71464e+07	3.94851e+07	23765309
VIEDDPEAVYTTTGGK	1xPhospho [Y/T]	Ephrin type-A receptor 7 OS=Homo sapiens OX=9606 GN=EPHA7 PE=1 SV=3	3.32154e+06	4.23874e+06	2.96493e+06
VIEDNEYTAR	1xPhospho [Y/T]	Tyrosine-protein kinase Lyn OS=Homo sapiens OX=9606 GN=LYN PE=1 SV=3	4777707	1.768e+06	606503
VIGAGEFGEVYK	1xPhospho [Y11]	Ephrin type-A receptor 2 OS=Homo sapiens OX=9606 GN=EPHA2 PE=1 SV=2	5.43549e+06	5.56226e+06	3.41789e+06
VLLPEYGGTK	1xPhospho [Y/T]	10 kDa heat shock protein, mitochondrial OS=Homo sapiens OX=9606 GN=HSPE1 PE=1 SV=2	1.95118e+06	1.94985e+06	1.35812e+06
VIMDYESLEK	1xPhospho [Y5]	Purine nucleoside phosphorylase OS=Homo sapiens OX=9606 GN=PNP PE=1 SV=2	1.60964e+06	5.7785e+06	2.08031e+06
VIQAQTAFSANPANPAILSEASAPIPHDGNLYPR	1xPhospho [Y32]	Syntenin-1 OS=Homo sapiens OX=9606 GN=SDCBP PE=1 SV=1	17583593	45276680	1.06075e+07
VFDKDGNGYISAAELR	1xPhospho [Y9]	Calmodulin-1 OS=Homo sapiens OX=9606 GN=CALM1 PE=1 SV=1	101580964	132467042	80302990
SVSSENPTYPSAPLKPVTVPPR	1xPhospho [S/Y]	SH3 domain-containing protein 19 OS=Homo sapiens OX=9606 GN=SH3D19 PE=1 SV=2	13213453	15852737	6.24471e+06
VESGYFSLEK	1xPhospho [Y5]	Myosin phosphatase Rho-interacting protein OS=Homo sapiens OX=9606 GN=MPRIP PE=1 SV=3	3808650	5636116	2.00806e+06
VDYVVVDQQK	1xPhospho [Y3]	GRB2-associated-binding protein 1 OS=Homo sapiens OX=9606 GN=GAB1 PE=1 SV=2	46054292	58995008	37434036
TTPSYVAFTDTER	1xPhospho [Y5]	Heat shock 70 kDa protein 6 OS=Homo sapiens OX=9606 GN=HSPA6 PE=1 SV=2;Heat shock cognate 71 kDa protein OS=Homo sapiens OX=9606 GN=HSPA8 PE=1 SV=1;Heat shock 70 kDa protein 1A OS=Homo sapiens OX=9606 GN=HSPA1A PE=1 SV=1	1.58653e+06	1.71369e+06	2866165
TTVYVVEDQR	1xPhospho [Y/T]	Cysteine-rich and transmembrane domain-containing protein 1 OS=Homo sapiens OX=9606 GN=CYSTM1 PE=1 SV=1	5.75794e+06	8.08893e+06	4300429
TVCSTYLQSR	1xCarbamidomethyl [C3]; 1xPhospho [T/Y]	Homeodomain-interacting protein kinase 3 OS=Homo sapiens OX=9606 GN=HIPK3 PE=1 SV=1	114088960	105048808	68291488
TVTYEDPQAVGGLASALDNR	1xPhospho [Y/T]	TOM1-like protein 2 OS=Homo sapiens OX=9606 GN=TOM1L2 PE=1 SV=1	2.3337e+06	3.74686e+06	1.50632e+06
TVTYEDPQAVGGLASALDNRK	1xPhospho [Y4]	TOM1-like protein 2 OS=Homo sapiens OX=9606 GN=TOM1L2 PE=1 SV=1	7.35568e+06	9669223	5.90663e+06
TYDYLFK	1xPhospho [Y2]	Ras-related protein Rab-8A OS=Homo sapiens OX=9606 GN=RAB8A PE=1 SV=1	7218564	7501253	5.31228e+06
TYELLNCDK	1xCarbamidomethyl [C7]; 1xPhospho [Y2]	Ribosomal RNA small subunit methyltransferase NEP1 OS=Homo sapiens OX=9606 GN=EMG1 PE=1 SV=4	2.95948e+06	4.22331e+06	2607253
TYETVASLGAATPQGESEDCPPPLPVK	1xCarbamidomethyl [C20]; 1xPhospho [Y2]	Arf-GAP with SH3 domain, ANK repeat and PH domain-containing protein 3 OS=Homo sapiens OX=9606 GN=ASAP3 PE=1 SV=1	3.90438e+06	5813111	2835935
TYVDPHTYEDPNQAVLK	1xPhospho [Y/T]	Ephrin type-A receptor 2 OS=Homo sapiens OX=9606 GN=EPHA2 PE=1 SV=2	63991471	7.54085e+07	5.02034e+07
VAAYDKLEK	1xPhospho [Y4]	Myosin-9 OS=Homo sapiens OX=9606 GN=MYH9 PE=1 SV=4	1.52142e+07	1.19143e+07	7812248
VADPDHDHTGFLTEYVATR	1xPhospho [Y/T]	Mitogen-activated protein kinase 1 OS=Homo sapiens OX=9606 GN=MAPK1 PE=1 SV=3	7885602736	10369881424	7.15903e+09
VADPDHDHTGFLTEYVATR	2xPhospho [T13; Y15]	Mitogen-activated protein kinase 1 OS=Homo sapiens OX=9606 GN=MAPK1 PE=1 SV=3	1642381028	2506977216	1.58754e+09
VAQQPLSLVGCEVVPDPSPDHLYSFR	1xCarbamidomethyl [C11]; 1xPhospho [Y/S]	Actin filament-associated protein 1-like 2 OS=Homo sapiens OX=9606 GN=AFAP1L2 PE=1 SV=1	159525874	415594072	198070006
VCEPCYEQLNR	2xCarbamidomethyl [C2; C5]; 1xPhospho [Y6]	Hepatocyte growth factor-regulated tyrosine kinase substrate OS=Homo sapiens OX=9606 GN=HGS PE=1 SV=1	5.09863e+06	5814564	3774830
VDKLYAGLK	1xPhospho [Y5]	Spectrin beta chain, non-erythrocytic 1 OS=Homo sapiens OX=9606 GN=SPTBN1 PE=1 SV=2	2.65729e+06	2.63475e+06	1850535
VEGDNIYVR	1xPhospho [Y7]	Band 4.1-like protein 2 OS=Homo sapiens OX=9606 GN=EPB41L2 PE=1 SV=1	2.3126e+06	2.40472e+06	1.26854e+06
LVQAAQMLQSDPYSVPAR	1xPhospho [Y/S]	Vinculin OS=Homo sapiens OX=9606 GN=VCL PE=1 SV=4	1.02384e+06	1.89409e+06	1.45003e+06
LYEQLSGK	1xPhospho [Y2]	Phosphatidylethanolamine-binding protein 1 OS=Homo sapiens OX=9606 GN=PEBP1 PE=1 SV=3	5174424	5206861	1.79332e+06
FIHQQPQSSSPVYGSSAK	2xPhospho [S10; Y13]	Paxillin OS=Homo sapiens OX=9606 GN=PXN PE=1 SV=3	1.17349e+07	16461941	1.00697e+07
EEDEHPYELLLTAETK	1xPhospho [Y7]	Ankyrin repeat and SAM domain-containing protein 1A OS=Homo sapiens OX=9606 GN=ANKS1A PE=1 SV=4	3.37735e+07	43106854	24407038
EEPEALYAAVNK	1xPhospho [Y7]	Intersectin-2 OS=Homo sapiens OX=9606 GN=ITSN2 PE=1 SV=3	5982688	7110041	4271373
EFEVYGPIKR	1xPhospho [Y5]	U1 small nuclear ribonucleoprotein 70 kDa OS=Homo sapiens OX=9606 GN=SNRNP70 PE=1 SV=2	2.86289e+06	3.36199e+06	1.24233e+06
EGIIPANYVQK	1xPhospho [Y8]	Tyrosine-protein kinase CSK OS=Homo sapiens OX=9606 GN=CSK PE=1 SV=1	4191615	4200748	2.62213e+06
EHALLAYTLGVK	1xPhospho [Y/T]	Elongation factor 1-alpha 2 OS=Homo sapiens OX=9606 GN=EEF1A2 PE=1 SV=1;Elongation factor 1-alpha 1 OS=Homo sapiens OX=9606 GN=EEF1A1 PE=1 SV=1	2.36018e+07	3.9186e+07	25623255
EKDYDFPPPMR	1xPhospho [Y4]	Enhancer of filamentation 1 OS=Homo sapiens OX=9606 GN=NEDD9 PE=1 SV=1	20252171	35539406	2.05497e+07
EDGSLQGPIGNQHIYQPVGKPDPAAPPK	1xPhospho [S/Y]	Focal adhesion kinase 1 OS=Homo sapiens OX=9606 GN=PTK2 PE=1 SV=2	1.1024e+07	13355684	8821453
EKPAQDPLYDVPNASGGQAGGPQRPGR	1xPhospho [Y9]	Ras and Rab interactor 1 OS=Homo sapiens OX=9606 GN=RIN1 PE=1 SV=4	79986804	99020632	56440104
EKYIDQEELNK	1xPhospho [Y3]	Heat shock protein HSP 90-alpha OS=Homo sapiens OX=9606 GN=HSP90AA1 PE=1 SV=5;Heat shock protein HSP 90-beta OS=Homo sapiens OX=9606 GN=HSP90AB1 PE=1 SV=4	3750865	3.07899e+06	1940996
ELFDDPSYVNVQNLDK	1xPhospho [Y/S]	SHC-transforming protein 1 OS=Homo sapiens OX=9606 GN=SHC1 PE=1 SV=4	748806232	1089774784	6.03227e+08
ELGEYGFHEYTEVK	1xPhospho [T/Y]	Retinal dehydrogenase 1 OS=Homo sapiens OX=9606 GN=ALDH1A1 PE=1 SV=2	65313909	91883920	5.27197e+07
EILVGDVGQTVDDPYATFVK	1xPhospho [Y/T]	Cofilin-1 OS=Homo sapiens OX=9606 GN=CFL1 PE=1 SV=3	9.54733e+06	14169775	6.89302e+06
EPSAPSIPTPAYQSSPAGGHAPTPPTPAPR	1xPhospho [S/Y]	Programmed cell death 6-interacting protein OS=Homo sapiens OX=9606 GN=PDCD6IP PE=1 SV=1	1.71791e+07	2.87626e+07	1.7335e+07
EPSSYDFVYHYG	1xPhospho [Y]	Engulfment and cell motility protein 2 OS=Homo sapiens OX=9606 GN=ELMO2 PE=1 SV=2	13108846	15216433	8430770
EKPSFPYQDRPSTQESFR	1xPhospho [Y7]	Inactive tyrosine-protein kinase PRAG1 OS=Homo sapiens OX=9606 GN=PRAG1 PE=1 SV=4	7819440	11219810	6.46085e+06
ERLYEWISIDKDEAGAK	1xPhospho [Y4]	Phosphatidylinositol 3,4,5-trisphosphate 5-phosphatase 2 OS=Homo sapiens OX=9606 GN=INPPL1 PE=1 SV=2	4816233	10498959	7.13345e+06
EDGKEDISDPMDPNPCSATYSNLGQSR	1xCarbamidomethyl [C16]; 1xPhospho [T/S/Y]; 1xOxidation [M11]	Inactive tyrosine-protein kinase PEAK1 OS=Homo sapiens OX=9606 GN=PEAK1 PE=1 SV=4	2.02438e+06	1.58468e+06	1.52829e+06
EATQPEPIYAESTK	1xPhospho [Y9]	Inactive tyrosine-protein kinase PRAG1 OS=Homo sapiens OX=9606 GN=PRAG1 PE=1 SV=4	215809639	242097037	157426698
DQLIYNLLKEEQTPQNK	1xPhospho [Y5]	L-lactate dehydrogenase A chain OS=Homo sapiens OX=9606 GN=LDHA PE=1 SV=2	3.0355e+06	5.14529e+06	2.87881e+06
DQYLMWLTQK	1xPhospho [Y3]	Phosphatidylinositol 3-kinase regulatory subunit alpha OS=Homo sapiens OX=9606 GN=PIK3R1 PE=1 SV=2	1.24362e+06	3721656	1.54994e+06
DQYLMWLTQK	1xPhospho [Y3]; 1xOxidation [M5]	Phosphatidylinositol 3-kinase regulatory subunit alpha OS=Homo sapiens OX=9606 GN=PIK3R1 PE=1 SV=2	2.42173e+06	4.6848e+06	2446116
DSNPYATLPR	1xPhospho [Y5]	Girdin OS=Homo sapiens OX=9606 GN=CCDC88A PE=1 SV=2	3.95908e+06	3260692	2.57144e+06
DTCYSPKPSVYLSTPSSASK	1xCarbamidomethyl [C3]; 1xPhospho [Y11]	CD2-associated protein OS=Homo sapiens OX=9606 GN=CD2AP PE=1 SV=1	4.60446e+06	4209671	3.33149e+06
DVDAAYMSK	1xPhospho [Y6]	Keratin, type II cytoskeletal 7 OS=Homo sapiens OX=9606 GN=KRT7 PE=1 SV=5	7.55847e+06	4.70802e+06	1.40041e+06
EATQPEPIYAESTKR	1xPhospho [Y9]	Inactive tyrosine-protein kinase PRAG1 OS=Homo sapiens OX=9606 GN=PRAG1 PE=1 SV=4	398239572	409885556	275935216
DVDEAYMNKVELESR	1xPhospho [Y6]	Keratin, type II cytoskeletal 8 OS=Homo sapiens OX=9606 GN=KRT8 PE=1 SV=7	8.59311e+06	8069979	5.03627e+06
DYHFVTSR	1xPhospho [Y2]	Disks large homolog 1 OS=Homo sapiens OX=9606 GN=DLG1 PE=1 SV=2	2.67392e+06	4265342	2.45878e+06
DYLHLPPEIVPATLR	1xPhospho [Y2]	40S ribosomal protein S10 OS=Homo sapiens OX=9606 GN=RPS10 PE=1 SV=1	6159980	17876682	10212622
DYSTVSASPTALSTLK	1xPhospho [Y2]	Rho guanine nucleotide exchange factor 5 OS=Homo sapiens OX=9606 GN=ARHGEF5 PE=1 SV=3	10563773	10844867	7034319
EAALYPHLPPEADPR	1xPhospho [Y5]	Sequestosome-1 OS=Homo sapiens OX=9606 GN=SQSTM1 PE=1 SV=1	3.20593e+07	4.09404e+07	2.52003e+07
EADPSNFANFSAYPSEEDMIEWAK	1xPhospho [Y/S]	Epidermal growth factor receptor substrate 15 OS=Homo sapiens OX=9606 GN=EPS15 PE=1 SV=2	4561803	18041206	7476422
EAEAAIYHLQLFEELR	1xPhospho [Y7]	Pyruvate kinase PKM OS=Homo sapiens OX=9606 GN=PKM PE=1 SV=4	1.06705e+06	4.83476e+06	2.70235e+06
DVTIGGSAPIYVK	1xPhospho [Y11]	Partitioning defective 3 homolog OS=Homo sapiens OX=9606 GN=PARD3 PE=1 SV=2	35750616	46465952	26442030
ERPAEPLTPPPSYGHQPQTGSGESSGASGDKDHLYSTVCKPR	1xCarbamidomethyl [C39]; 2xPhospho [T8; Y35]	Transforming growth factor beta-1-induced transcript 1 protein OS=Homo sapiens OX=9606 GN=TGFB1I1 PE=1 SV=2	9201423	13585440	6569555
ERPCSAIYPTPVEPSQR	1xCarbamidomethyl [C4]; 1xPhospho [Y8]	Dedicator of cytokinesis protein 4 OS=Homo sapiens OX=9606 GN=DOCK4 PE=1 SV=3	3.67105e+06	5158361	3.48498e+06
ESLATSEMSAFHQPGPCEDPSCLTHGDYYDNLSLASPK	2xCarbamidomethyl [C17; C22]; 1xPhospho [Y/T]	LIM domain-containing protein 1 OS=Homo sapiens OX=9606 GN=LIMD1 PE=1 SV=1	10367875	36902080	20015542
FSGFYSMQK	1xPhospho [Y5]	Cysteine-rich motor neuron 1 protein OS=Homo sapiens OX=9606 GN=CRIM1 PE=1 SV=1	3.31074e+06	5.01606e+06	2.93375e+06
FSGWYDADLSPAGHEEAK	1xPhospho [Y5]	Phosphoglycerate mutase 1 OS=Homo sapiens OX=9606 GN=PGAM1 PE=1 SV=2	5.37492e+06	9.81915e+06	5.09332e+06
FSGWYDADLSPAGHEEAKR	1xPhospho [Y5]	Phosphoglycerate mutase 1 OS=Homo sapiens OX=9606 GN=PGAM1 PE=1 SV=2	3.06867e+06	4.70165e+06	2.59184e+06
FSISPDEDSSSYSSNSDFNYSYPTK	1xPhospho [Y/S]	Sodium-coupled neutral amino acid transporter 2 OS=Homo sapiens OX=9606 GN=SLC38A2 PE=1 SV=2	10257581	1.28621e+07	6.98016e+06
FTPKPYTSSARPFER	1xPhospho [T/Y]	Tight junction protein ZO-1 OS=Homo sapiens OX=9606 GN=TJP1 PE=1 SV=3	1.34262e+06	1.66181e+06	728280
FYCDYCDTYLTHDSPSVR	2xCarbamidomethyl [C3; C6]; 1xPhospho [Y/T]	U1 small nuclear ribonucleoprotein C OS=Homo sapiens OX=9606 GN=SNRPC PE=1 SV=1	14292326	21061448	11438025
FIHQQPQSSSPVYGSSAK	1xPhospho [Y/S]	Paxillin OS=Homo sapiens OX=9606 GN=PXN PE=1 SV=3	189217396	247976600	156772550
GASQAGMTGYGMPR	1xPhospho [Y10]	Transgelin-2 OS=Homo sapiens OX=9606 GN=TAGLN2 PE=1 SV=3	1.62207e+06	3.21137e+06	2.29398e+06
GDDLLPAGTEDYIHIR	1xPhospho [Y12]	Eukaryotic translation initiation factor 1b OS=Homo sapiens OX=9606 GN=EIF1B PE=1 SV=2	12969082	24747256	1.83667e+07
GDKQVEYLDLDLDSGK	1xPhospho [Y7]	GRB2-associated-binding protein 1 OS=Homo sapiens OX=9606 GN=GAB1 PE=1 SV=2	5470240	9.63193e+06	4.77949e+06
GDIVYIHK	1xPhospho [Y5]	Vinexin OS=Homo sapiens OX=9606 GN=SORBS3 PE=1 SV=2	2.87485e+06	2.50795e+06	1.93846e+06
GDYPLEAVR	1xPhospho [Y3]	Pyruvate kinase PKM OS=Homo sapiens OX=9606 GN=PKM PE=1 SV=4	10694421	13816306	8.10499e+06
GEPNVSYICSR	1xCarbamidomethyl [C9]; 1xPhospho [Y/S]	Glycogen synthase kinase-3 alpha OS=Homo sapiens OX=9606 GN=GSK3A PE=1 SV=2	32434044450	3.43841e+10	2.37307e+10
GESAGYMEPYEAQR	1xPhospho [S/Y]	SH2 domain-containing adapter protein B OS=Homo sapiens OX=9606 GN=SHB PE=1 SV=2	2.90858e+06	5948326	3.63954e+06
GAYCLSVSDFDNAK	1xCarbamidomethyl [C4]; 1xPhospho [Y3]	Proto-oncogene tyrosine-protein kinase Src OS=Homo sapiens OX=9606 GN=SRC PE=1 SV=3	2218915	3.15619e+06	1.46111e+06
FKYFESDHLGSGSHFSNR	1xPhospho [Y/S]	Uveal autoantigen with coiled-coil domains and ankyrin repeats OS=Homo sapiens OX=9606 GN=UACA PE=1 SV=2	3881427	8310665	4541932
FDTIYQILLK	1xPhospho [Y5]	E3 ubiquitin/ISG15 ligase TRIM25 OS=Homo sapiens OX=9606 GN=TRIM25 PE=1 SV=2	3.15546e+06	6756715	3167964
FAQHGTFEYEYSQR	1xPhospho [Y9]	Splicing factor, proline- and glutamine-rich OS=Homo sapiens OX=9606 GN=SFPQ PE=1 SV=2	1.68687e+06	1.57624e+06	1.07114e+06
ESMCSTPAFPVSPETPYVK	1xCarbamidomethyl [C4]; 1xPhospho [Y17]	Tensin-3 OS=Homo sapiens OX=9606 GN=TNS3 PE=1 SV=2	128368264	259408408	128070956
ESMCSTPAFPVSPETPYVK	1xCarbamidomethyl [C4]; 1xPhospho [Y17]; 1xOxidation [M3]	Tensin-3 OS=Homo sapiens OX=9606 GN=TNS3 PE=1 SV=2	1.13588e+08	1.39723e+08	1.00656e+08
ESSSIYISK	1xPhospho [Y6]	UDP-glucose 6-dehydrogenase OS=Homo sapiens OX=9606 GN=UGDH PE=1 SV=1	5.48232e+06	5661633	3.22119e+06
ETMTPGYPQDLDIIDGR	1xPhospho [Y/T]	Tensin-3 OS=Homo sapiens OX=9606 GN=TNS3 PE=1 SV=2	2687458	9.26571e+06	4.57961e+06
ETMTPGYPQDLDIIDGR	1xPhospho [Y/T]; 1xOxidation [M3]	Tensin-3 OS=Homo sapiens OX=9606 GN=TNS3 PE=1 SV=2	4.55614e+06	6.93955e+06	4.71241e+06
EVCDGWSLPNPEYYTLR	1xCarbamidomethyl [C3]; 1xPhospho [T/Y]	Engulfment and cell motility protein 2 OS=Homo sapiens OX=9606 GN=ELMO2 PE=1 SV=2	1.06499e+07	25700433	1.19175e+07
EVEEYKNFRPDDPAR	1xPhospho [Y5]	Dynamin-1 OS=Homo sapiens OX=9606 GN=DNM1 PE=1 SV=2	11517072	13018165	9334407
EVEEYKNFRPDDPTR	1xPhospho [Y5]	Dynamin-2 OS=Homo sapiens OX=9606 GN=DNM2 PE=1 SV=2	5828203	6.74081e+06	4.35462e+06
EVTTVLQADSAEYAQPLVGGIVGTLHQR	1xPhospho [T/Y]	Discoidin, CUB and LCCL domain-containing protein 2 OS=Homo sapiens OX=9606 GN=DCBLD2 PE=1 SV=1	2.31661e+06	1.42504e+07	6464245
EVYLDLVK	1xPhospho [Y3]	TOM1-like protein 1 OS=Homo sapiens OX=9606 GN=TOM1L1 PE=1 SV=2	1.37748e+06	1.5298e+06	960246
EYDQLYEEYTR	1xPhospho [Y/T]	Phosphatidylinositol 3-kinase regulatory subunit beta OS=Homo sapiens OX=9606 GN=PIK3R2 PE=1 SV=2	16342227	19047442	8666956
EYDRLYEEYTR	1xPhospho [Y]	Phosphatidylinositol 3-kinase regulatory subunit alpha OS=Homo sapiens OX=9606 GN=PIK3R1 PE=1 SV=2	16522633	2.00381e+07	1.17286e+07
EYFTFPASK	1xPhospho [Y2]	Afadin OS=Homo sapiens OX=9606 GN=AFDN PE=1 SV=3	2.0037e+06	2.61364e+06	2.26807e+06
EYGMIYLGK	1xPhospho [Y2]	Staphylococcal nuclease domain-containing protein 1 OS=Homo sapiens OX=9606 GN=SND1 PE=1 SV=1	2215346	4.18832e+06	2.59983e+06
EYVNASEVSSGKPVSAR	1xPhospho [Y2]	Zinc finger protein 185 OS=Homo sapiens OX=9606 GN=ZNF185 PE=1 SV=3	1.9294e+06	2.11001e+06	1.66966e+06
DQLIYNLLK	1xPhospho [Y5]	L-lactate dehydrogenase A chain OS=Homo sapiens OX=9606 GN=LDHA PE=1 SV=2	1.77202e+06	5019429	2.3171e+06
GGPGSAVSPYPTFNPSSDVAALHK	1xPhospho [S/Y]	Annexin A1 OS=Homo sapiens OX=9606 GN=ANXA1 PE=1 SV=2	4.38711e+06	6011610	4289851
DPYATSVGHLIEK	1xPhospho [Y/T]	TOM1-like protein 1 OS=Homo sapiens OX=9606 GN=TOM1L1 PE=1 SV=2	3468353	6352969	2.93615e+06
DPHLLDPTVEYVK	1xPhospho [Y11]	Breast cancer anti-estrogen resistance protein 3 OS=Homo sapiens OX=9606 GN=BCAR3 PE=1 SV=1	91520260	114133916	71916822
AIMTYVSSFYHAFSGAQK	1xPhospho [Y10]; 1xOxidation [M3]	Alpha-actinin-1 OS=Homo sapiens OX=9606 GN=ACTN1 PE=1 SV=2;Alpha-actinin-4 OS=Homo sapiens OX=9606 GN=ACTN4 PE=1 SV=2	5.94968e+06	1.51861e+07	4.25515e+06
ALNGAEPNYHSLPSAR	1xPhospho [Y/S]	Ragulator complex protein LAMTOR1 OS=Homo sapiens OX=9606 GN=LAMTOR1 PE=1 SV=2	9.84204e+06	12102140	8.62636e+06
ALPQNDDHYVMQEHR	1xPhospho [Y9]	Activated CDC42 kinase 1 OS=Homo sapiens OX=9606 GN=TNK2 PE=1 SV=3	2.80906e+06	5.78641e+06	3022117
ALSSEGKPYVTKEELYQNLTR	1xPhospho [Y/S]	Spectrin alpha chain, non-erythrocytic 1 OS=Homo sapiens OX=9606 GN=SPTAN1 PE=1 SV=3	6145849	10553332	5817747
ANNTFYGLSAGVFTK	1xPhospho [Y6]	Retinal dehydrogenase 1 OS=Homo sapiens OX=9606 GN=ALDH1A1 PE=1 SV=2	8827069	10838456	5.4805e+06
ANYDVLESQK	1xPhospho [Y3]	26S proteasome non-ATPase regulatory subunit 9 OS=Homo sapiens OX=9606 GN=PSMD9 PE=1 SV=3	5.341e+06	4885128	3481387
AIMTYVSSFYHAFSGAQK	1xPhospho [Y10]	Alpha-actinin-1 OS=Homo sapiens OX=9606 GN=ACTN1 PE=1 SV=2;Alpha-actinin-4 OS=Homo sapiens OX=9606 GN=ACTN4 PE=1 SV=2	5.8801e+06	27793844	5.87272e+06
APDFVFYAPR	1xPhospho [Y7]	Moesin OS=Homo sapiens OX=9606 GN=MSN PE=1 SV=3;Ezrin OS=Homo sapiens OX=9606 GN=EZR PE=1 SV=4	1.78084e+06	2.48084e+06	1.2657e+06
AQLDYVDLYLIHSPMSLKPGEELSPTDENGK	1xPhospho [Y/S]	Aldo-keto reductase family 1 member C3 OS=Homo sapiens OX=9606 GN=AKR1C3 PE=1 SV=4	5.14804e+06	2.8995e+07	13896819
AQLDYVDLYLIHSPMSLKPGEELSPTDENGK	1xPhospho [Y/S]; 1xOxidation [M15]	Aldo-keto reductase family 1 member C3 OS=Homo sapiens OX=9606 GN=AKR1C3 PE=1 SV=4	4063293	1.67228e+07	1.02301e+07
AQYDDIVTR	1xPhospho [Y3]	Keratin, type II cuticular Hb1 OS=Homo sapiens OX=9606 GN=KRT81 PE=1 SV=3	38309964	35536552	25487388
AQYEDIANR	1xPhospho [Y3]	Keratin, type II cytoskeletal 8 OS=Homo sapiens OX=9606 GN=KRT8 PE=1 SV=7	3501604	1.11077e+06	741055
ARPATDSFDDYPPR	1xPhospho [Y11]	Eukaryotic translation initiation factor 4B OS=Homo sapiens OX=9606 GN=EIF4B PE=1 SV=2	36513416	41151709	2.65663e+07
ARPATDSFDDYPPRR	1xPhospho [Y11]	Eukaryotic translation initiation factor 4B OS=Homo sapiens OX=9606 GN=EIF4B PE=1 SV=2	8554801	10253442	5906764
APYTCGGDSDQYVLMSSPVGR	1xCarbamidomethyl [C5]; 1xPhospho [Y12]	Insulin receptor substrate 2 OS=Homo sapiens OX=9606 GN=IRS2 PE=1 SV=2	3.52738e+06	13117037	3674929
ARPEYMLPVHFYGR	1xPhospho [Y5]; 1xOxidation [M6]	Glycogen phosphorylase, brain form OS=Homo sapiens OX=9606 GN=PYGB PE=1 SV=5	2.23375e+06	3.08705e+06	1.93741e+06
ALELDSNLYR	1xPhospho [Y9]	Myosin-9 OS=Homo sapiens OX=9606 GN=MYH9 PE=1 SV=4	17020842	20043984	16620019
ALDYYMLR	1xPhospho [Y4]	Talin-1 OS=Homo sapiens OX=9606 GN=TLN1 PE=1 SV=3	30713600	63953320	31750352
AAVPSGASTGIYEALELR	1xPhospho [Y12]	Alpha-enolase OS=Homo sapiens OX=9606 GN=ENO1 PE=1 SV=2	71949108	116382700	67092254
ACNVLQSSHLEDYPFNAEY	1xCarbamidomethyl [C2]; 1xPhospho [Y]	Aldo-keto reductase family 1 member B10 OS=Homo sapiens OX=9606 GN=AKR1B10 PE=1 SV=2	18268538	32140414	1.50967e+07
ADHQPLTEASYVNLPTIALCNTDSPLR	1xCarbamidomethyl [C20]; 1xPhospho [T/Y/S]	40S ribosomal protein SA OS=Homo sapiens OX=9606 GN=RPSA PE=1 SV=4	15429622	59883793	26812702
ADYDTLSLR	1xPhospho [Y3]	Plakophilin-3 OS=Homo sapiens OX=9606 GN=PKP3 PE=1 SV=1	9358001	10234156	7.2945e+06
AFVAIGDYNGHVGLGVK	1xPhospho [Y8]	40S ribosomal protein S2 OS=Homo sapiens OX=9606 GN=RPS2 PE=1 SV=2	1.545e+06	6.87661e+06	2.89213e+06
AFYVPAQYVK	1xPhospho [Y3]	Rho GTPase-activating protein 12 OS=Homo sapiens OX=9606 GN=ARHGAP12 PE=1 SV=1	4721729	2.94432e+06	4053010
ALEHFTDLYDIKR	1xPhospho [Y9]	Clathrin heavy chain 1 OS=Homo sapiens OX=9606 GN=CLTC PE=1 SV=5	18615252	31715026	20276034
AGKPGLPAPDELVYQVPQSTQEVSGAGR	1xPhospho [Y14]	Discoidin, CUB and LCCL domain-containing protein 2 OS=Homo sapiens OX=9606 GN=DCBLD2 PE=1 SV=1	6.68756e+06	11377225	6579173
AGVDYAPNLPPFPSPADVK	1xPhospho [Y5]	Tensin-3 OS=Homo sapiens OX=9606 GN=TNS3 PE=1 SV=2	7.6201e+06	1.34404e+07	7623673
AHAWPSPYK	1xPhospho [Y8]	Retinoic acid-induced protein 3 OS=Homo sapiens OX=9606 GN=GPRC5A PE=1 SV=2	1.4432e+06	1.78575e+06	948239
AHAWPSPYKDYEVK	1xPhospho [Y/S]	Retinoic acid-induced protein 3 OS=Homo sapiens OX=9606 GN=GPRC5A PE=1 SV=2	3.60055e+07	6.5204e+07	3.53351e+07
AHAWPSPYKDYEVK	2xPhospho [S6; Y8]	Retinoic acid-induced protein 3 OS=Homo sapiens OX=9606 GN=GPRC5A PE=1 SV=2	1.76835e+06	3.48122e+06	1.3466e+06
AHAWPSPYKDYEVKK	1xPhospho [Y11]	Retinoic acid-induced protein 3 OS=Homo sapiens OX=9606 GN=GPRC5A PE=1 SV=2	2.09728e+07	35897822	2.44492e+07
AHAWPSPYKDYEVKK	2xPhospho [Y11; S/Y]	Retinoic acid-induced protein 3 OS=Homo sapiens OX=9606 GN=GPRC5A PE=1 SV=2	1.26017e+07	1.90509e+07	5597611
AGLQTADKYAALANLDNIFSAGQGGDQGSGFGTTGK	1xPhospho [Y9]	Arf-GAP domain and FG repeat-containing protein 1 OS=Homo sapiens OX=9606 GN=AGFG1 PE=1 SV=2	2.6635e+06	6341237	3.41343e+06
ARYEMASNPLYR	1xPhospho [Y3]	Integrin beta-5 OS=Homo sapiens OX=9606 GN=ITGB5 PE=1 SV=1	956456	2.88436e+06	1.35961e+06
ASQLYSHNLPGLFDYAR	1xPhospho [Y15]	Mitogen-activated protein kinase kinase kinase kinase 3 OS=Homo sapiens OX=9606 GN=MAP4K3 PE=1 SV=1	1.52642e+06	2716495	1.45361e+06
ASTDVAGQAVTINLVPTEEQAKPYR	1xPhospho [Y24]	Inactive tyrosine-protein kinase PEAK1 OS=Homo sapiens OX=9606 GN=PEAK1 PE=1 SV=4	2.52747e+06	4.22096e+06	2.3933e+06
DGQPYCEKDYHNLFSPR	1xCarbamidomethyl [C6]; 1xPhospho [Y10]	Paxillin OS=Homo sapiens OX=9606 GN=PXN PE=1 SV=3	2.32442e+06	1.91946e+06	1023437
DGSLASNPYSGDLTK	1xPhospho [Y/S/T]	Ubiquitin-associated protein 2-like OS=Homo sapiens OX=9606 GN=UBAP2L PE=1 SV=2	2.0539e+06	2514597	1.5507e+06
DGYNYTLSK	1xPhospho [Y3]	Protein S100-A11 OS=Homo sapiens OX=9606 GN=S100A11 PE=1 SV=2	7.52253e+06	6.15996e+06	3.75786e+06
DGYVWSGK	1xPhospho [Y3]	Suppressor of cytokine signaling 4 OS=Homo sapiens OX=9606 GN=SOCS4 PE=1 SV=1	11726835	10880908	7.17185e+06
DHPALNYNIVSGPPSHK	1xPhospho [Y7]	Serine palmitoyltransferase 1 OS=Homo sapiens OX=9606 GN=SPTLC1 PE=1 SV=1	3253619	4828079	2.98303e+06
DKVTIADDYSDPFDAK	1xPhospho [Y9]	SH2 domain-containing adapter protein B OS=Homo sapiens OX=9606 GN=SHB PE=1 SV=2	12399269	2.04635e+07	11581463
DGNGYISAAELR	1xPhospho [Y5]	Calmodulin-1 OS=Homo sapiens OX=9606 GN=CALM1 PE=1 SV=1	3888647	5211874	2.64934e+06
DLAEDLYDGQVLQK	1xPhospho [Y7]	Alpha-parvin OS=Homo sapiens OX=9606 GN=PARVA PE=1 SV=1	2.04349e+06	5.04625e+06	1.45106e+06
DIHHIDYYK	1xPhospho [Y]	Fibroblast growth factor receptor 1 OS=Homo sapiens OX=9606 GN=FGFR1 PE=1 SV=3	2.34312e+06	5.67958e+06	1.99226e+06
DIHHIDYYKK	1xPhospho [Y]	Fibroblast growth factor receptor 1 OS=Homo sapiens OX=9606 GN=FGFR1 PE=1 SV=3	2.77324e+07	39435004	2.69468e+07
DMYDKEYYSVHNK	1xPhospho [Y/S]	Hepatocyte growth factor receptor OS=Homo sapiens OX=9606 GN=MET PE=1 SV=4	2.51269e+06	8.2274e+06	4.37746e+06
DMYDKEYYSVHNK	1xPhospho [Y]; 1xOxidation [M2]	Hepatocyte growth factor receptor OS=Homo sapiens OX=9606 GN=MET PE=1 SV=4	2.63857e+06	1952409	1.43655e+06
DNDFIYHDRVPDLK	1xPhospho [Y6]	Programmed cell death 6-interacting protein OS=Homo sapiens OX=9606 GN=PDCD6IP PE=1 SV=1	2.56425e+06	4.04548e+06	1.86938e+06
DNHLHFYQDR	1xPhospho [Y7]	Actin filament-associated protein 1-like 2 OS=Homo sapiens OX=9606 GN=AFAP1L2 PE=1 SV=1	4.51521e+06	5.41414e+06	3.52994e+06
DLDIIDNYDYSHTVK	1xPhospho [Y/T/S]	Filamin-B OS=Homo sapiens OX=9606 GN=FLNB PE=1 SV=2	5.6555e+06	9.03892e+06	2.97007e+06
DFVDHLDKVDPVDGVVLVDPDYLKDR	1xPhospho [Y22]	Beta-arrestin-2 OS=Homo sapiens OX=9606 GN=ARRB2 PE=1 SV=2	1.94964e+06	7931470	4.50795e+06
DEGNYLDDALVR	1xPhospho [Y5]	Annexin A4 OS=Homo sapiens OX=9606 GN=ANXA4 PE=1 SV=4	2.72616e+06	3.03608e+06	1.90066e+06
CYEMASHLR	1xCarbamidomethyl [C1]; 1xPhospho [Y2]	Profilin-1 OS=Homo sapiens OX=9606 GN=PFN1 PE=1 SV=2	1.22063e+07	1.65387e+07	1.04646e+07
ATGNQPPPLVGTYNTLLSR	1xPhospho [S/Y/T]	Discoidin, CUB and LCCL domain-containing protein 2 OS=Homo sapiens OX=9606 GN=DCBLD2 PE=1 SV=1	3.93673e+06	8.09424e+06	3.23153e+06
AVCSTYLQSR	1xCarbamidomethyl [C3]; 1xPhospho [Y6]	Homeodomain-interacting protein kinase 1 OS=Homo sapiens OX=9606 GN=HIPK1 PE=1 SV=1	362606752	338702848	209896144
AVDGYVKPQIK	1xPhospho [Y5]	Signal transducer and activator of transcription 5B OS=Homo sapiens OX=9606 GN=STAT5B PE=1 SV=2;Signal transducer and activator of transcription 5A OS=Homo sapiens OX=9606 GN=STAT5A PE=1 SV=1	2.01674e+09	1.86508e+09	1.38807e+09
AVEYLLMGIPGDR	1xPhospho [Y4]	UV excision repair protein RAD23 homolog B OS=Homo sapiens OX=9606 GN=RAD23B PE=1 SV=1	1.27329e+06	3011535	1.46396e+06
AVLYADYR	1xPhospho [Y]	Kin of IRRE-like protein 1 OS=Homo sapiens OX=9606 GN=KIRREL1 PE=1 SV=2	1988318	2.35351e+06	1.32495e+06
AVSSAIAQLLGEVAQGNENYAGIAAR	1xPhospho [Y20]	Talin-1 OS=Homo sapiens OX=9606 GN=TLN1 PE=1 SV=3	5717806	113600200	58853688
AYADSYYYEDGGMKPR	1xPhospho [Y6]	Coiled-coil domain-containing protein 50 OS=Homo sapiens OX=9606 GN=CCDC50 PE=1 SV=1	2.50425e+06	5405108	3.65502e+06
AYADSYYYEDGGMKPR	1xPhospho [Y]; 1xOxidation [M13]	Coiled-coil domain-containing protein 50 OS=Homo sapiens OX=9606 GN=CCDC50 PE=1 SV=1	1.5972e+06	1428131	1.72777e+06
AYHEQLSVAEITNACFEPANQMVK	1xCarbamidomethyl [C15]; 1xPhospho [Y2]	Tubulin alpha-1B chain OS=Homo sapiens OX=9606 GN=TUBA1B PE=1 SV=1	1.91945e+06	11639366	6.36868e+06
AYSQEEITQGFEETGDTLYAPYSTHFQLQNQPPQK	1xPhospho [Y/T/S]	Retinoic acid-induced protein 3 OS=Homo sapiens OX=9606 GN=GPRC5A PE=1 SV=2	3.15338e+07	8.22636e+07	4.28686e+07
AYTNFDAER	1xPhospho [Y2]	Annexin A2 OS=Homo sapiens OX=9606 GN=ANXA2 PE=1 SV=2	6.81404e+06	6.35754e+06	3.72765e+06
CLEEHYGTSPGQAR	1xCarbamidomethyl [C1]; 1xPhospho [Y6]	Breast cancer anti-estrogen resistance protein 3 OS=Homo sapiens OX=9606 GN=BCAR3 PE=1 SV=1	11898284	1.29157e+07	8.01939e+06
CLKDEDPYVRK	1xCarbamidomethyl [C1]; 1xPhospho [Y8]	AP-2 complex subunit beta OS=Homo sapiens OX=9606 GN=AP2B1 PE=1 SV=1	2.90289e+06	2.32705e+06	1.59026e+06
CNEQPNRVEIYEK	1xCarbamidomethyl [C1]; 1xPhospho [Y11]	Cytoplasmic FMR1-interacting protein 1 OS=Homo sapiens OX=9606 GN=CYFIP1 PE=1 SV=1	3.12863e+06	4.13906e+06	2.39889e+06
CSDAAGYPHATHDLEGPPLDAYSIQGQHTISPLDLAK	1xCarbamidomethyl [C1]; 1xPhospho [T/Y/S]	Poly(rC)-binding protein 1 OS=Homo sapiens OX=9606 GN=PCBP1 PE=1 SV=2	15560532	39620360	21724904
DPHYQDPHSTAVGNPEYLNTVQPTCVNSTFDSPAHWAQK	1xCarbamidomethyl [C25]; 1xPhospho [Y/T]	Epidermal growth factor receptor OS=Homo sapiens OX=9606 GN=EGFR PE=1 SV=2	2.84906e+07	63990073	29133455
GGYFDEFGIIR	1xPhospho [Y3]	Glucose-6-phosphate 1-dehydrogenase OS=Homo sapiens OX=9606 GN=G6PD PE=1 SV=4	2.90697e+06	4.24402e+06	1.76986e+06
YYVTIIDAPGHR	1xPhospho [Y2]	Elongation factor 1-alpha 1 OS=Homo sapiens OX=9606 GN=EEF1A1 PE=1 SV=1	4.65176e+06	4412030	3.81863e+06
GHYNNVSCAVFHPR	1xCarbamidomethyl [C8]; 1xPhospho [Y3]	Coatomer subunit alpha OS=Homo sapiens OX=9606 GN=COPA PE=1 SV=2	1279294	1.36643e+06	976746
IAYSLLGLK	1xPhospho [Y3]	Ephrin type-A receptor 2 OS=Homo sapiens OX=9606 GN=EPHA2 PE=1 SV=2	1.97588e+06	6.9236e+06	3.25731e+06
LCDFGSASHVADNDITPYLVSR	1xCarbamidomethyl [C2]; 1xPhospho [Y/S/T]	Serine/threonine-protein kinase PRP4 homolog OS=Homo sapiens OX=9606 GN=PRPF4B PE=1 SV=3	12753209249	2.32313e+10	1.32222e+10
LDHHPEWFNVYNK	1xPhospho [Y11]	Pterin-4-alpha-carbinolamine dehydratase OS=Homo sapiens OX=9606 GN=PCBD1 PE=1 SV=2	1.43045e+06	2.25743e+06	1.19957e+06
IDSIPHLNNSTPLVDPSVYGYGVQK	1xPhospho [Y21]	Far upstream element-binding protein 3 OS=Homo sapiens OX=9606 GN=FUBP3 PE=1 SV=2	3.53344e+06	9093332	3.9874e+06
IEDPVYGIYYVDHINR	1xPhospho [Y6]	Membrane-associated guanylate kinase, WW and PDZ domain-containing protein 1 OS=Homo sapiens OX=9606 GN=MAGI1 PE=1 SV=3	5818612	11179550	6.51243e+06
IFVEESIYDEFVR	1xPhospho [Y8]	Retinal dehydrogenase 1 OS=Homo sapiens OX=9606 GN=ALDH1A1 PE=1 SV=2	7.16015e+06	13130596	3301538
LAYINPDLALEEK	1xPhospho [Y3]	Stress-induced-phosphoprotein 1 OS=Homo sapiens OX=9606 GN=STIP1 PE=1 SV=1	2.29683e+06	3.33035e+06	1.88192e+06
IFVEESIYDEFVRR	1xPhospho [Y8]	Retinal dehydrogenase 1 OS=Homo sapiens OX=9606 GN=ALDH1A1 PE=1 SV=2	1.30175e+06	4.20757e+06	2855111
LGAAPEEESAYVAGEKR	1xPhospho [Y11]	NSFL1 cofactor p47 OS=Homo sapiens OX=9606 GN=NSFL1C PE=1 SV=2	3515995	3672514	2.23431e+06
IGAEVYHNLK	1xPhospho [Y6]	Alpha-enolase OS=Homo sapiens OX=9606 GN=ENO1 PE=1 SV=2	2.12789e+06	2.4891e+06	1.72996e+06
LGEGTYATVYK	1xPhospho [Y/T]	Cyclin-dependent kinase 17 OS=Homo sapiens OX=9606 GN=CDK17 PE=1 SV=2	3.38859e+07	2.00304e+07	1.44345e+07
IGEGTYGTVFK	1xPhospho [Y6]	Cyclin-dependent-like kinase 5 OS=Homo sapiens OX=9606 GN=CDK5 PE=1 SV=3	8818011	11481666	8452094
IGEGTYGVVYK	1xPhospho [Y]	Cyclin-dependent kinase 3 OS=Homo sapiens OX=9606 GN=CDK3 PE=1 SV=1	17305806445	16988690663	12060738853
IGEGTYGVVYK	2xPhospho [T5; Y6]	Cyclin-dependent kinase 3 OS=Homo sapiens OX=9606 GN=CDK3 PE=1 SV=1	186210512	215539608	1.09928e+08
LGAAPEEESAYVAGEK	1xPhospho [Y11]	NSFL1 cofactor p47 OS=Homo sapiens OX=9606 GN=NSFL1C PE=1 SV=2	3.75429e+06	4.40188e+06	2.32865e+06
LGEYEDVSR	1xPhospho [Y4]	Tubulin-folding cofactor B OS=Homo sapiens OX=9606 GN=TBCB PE=1 SV=2	5.88979e+06	4686074	2.17405e+06
IAIYELLFK	1xPhospho [Y4]	40S ribosomal protein S10 OS=Homo sapiens OX=9606 GN=RPS10 PE=1 SV=1	2.71016e+06	11508859	4.68164e+06
IADPEHDHTGFLTEYVATR	1xPhospho [Y/T]	Mitogen-activated protein kinase 3 OS=Homo sapiens OX=9606 GN=MAPK3 PE=1 SV=4	3.77581e+09	6.02421e+09	3820863466
KPSTSSVTSDEKVDYVQVDKEK	1xPhospho [Y15]	GRB2-associated-binding protein 2 OS=Homo sapiens OX=9606 GN=GAB2 PE=1 SV=1	14807250	19564358	13270033
KPTYDPVSEDQDPLSSDFK	1xPhospho [Y/T]	Activated CDC42 kinase 1 OS=Homo sapiens OX=9606 GN=TNK2 PE=1 SV=3	1.02894e+07	1.27924e+07	8102594
KPTYDPVSEDQDPLSSDFKR	1xPhospho [Y4]	Activated CDC42 kinase 1 OS=Homo sapiens OX=9606 GN=TNK2 PE=1 SV=3	11422603	12688193	8734995
KQEYLEVQR	1xPhospho [Y4]	Hepatocyte growth factor-regulated tyrosine kinase substrate OS=Homo sapiens OX=9606 GN=HGS PE=1 SV=1	19313981	2.22104e+07	1.3978e+07
KSFTPDHVVYAR	1xPhospho [Y10]	Caveolae-associated protein 1 OS=Homo sapiens OX=9606 GN=CAVIN1 PE=1 SV=1	8268127	9740956	6759824
KSTGSVDYLALDFQPSSPSPHR	1xPhospho [Y8]	GRB2-associated-binding protein 2 OS=Homo sapiens OX=9606 GN=GAB2 PE=1 SV=1	3.20688e+06	4.22873e+06	2.0092e+06
IADPEHDHTGFLTEYVATR	2xPhospho [T13; Y15]	Mitogen-activated protein kinase 3 OS=Homo sapiens OX=9606 GN=MAPK3 PE=1 SV=4	607489288	1.01944e+09	602052261
KSTGSVDYLALDFQPSSPSPHR	2xPhospho [Y8; S17]	GRB2-associated-binding protein 2 OS=Homo sapiens OX=9606 GN=GAB2 PE=1 SV=1	13868239	21040722	10189071
KTYDLLFK	1xPhospho [Y3]	Ras-related protein Rab-10 OS=Homo sapiens OX=9606 GN=RAB10 PE=1 SV=1	12417610	11106422	7420767
KVSSTHYYLLPERPPYLDK	1xPhospho [Y7]	ERBB receptor feedback inhibitor 1 OS=Homo sapiens OX=9606 GN=ERRFI1 PE=1 SV=1	3.61491e+07	1.05399e+08	5.94634e+07
KVSSTHYYLLPERPSYLER	1xPhospho [T/Y]	Activated CDC42 kinase 1 OS=Homo sapiens OX=9606 GN=TNK2 PE=1 SV=3	1.01737e+07	3.63077e+07	15110767
KVYNDGYDDDNYDYIVK	1xPhospho [Y12]	Dual specificity tyrosine-phosphorylation-regulated kinase 1A OS=Homo sapiens OX=9606 GN=DYRK1A PE=1 SV=2	6991007	7404461	5.10281e+06
KYFSLKPEEK	1xPhospho [Y/S]	CD2-associated protein OS=Homo sapiens OX=9606 GN=CD2AP PE=1 SV=1	2.77637e+06	3.91023e+06	2.73466e+06
KYPDYIQIAMPTESR	1xPhospho [Y5]	Phosphatidylcholine:ceramide cholinephosphotransferase 2 OS=Homo sapiens OX=9606 GN=SGMS2 PE=1 SV=1	1.33025e+06	1.9624e+06	1.29433e+06
KTHIQDNHDGTYTVAYVPDVTGR	1xPhospho [Y/T]	Filamin-A OS=Homo sapiens OX=9606 GN=FLNA PE=1 SV=4	1415618	3259890	1864705
KLSLGQYDNDAGGQLPFSK	2xPhospho [S3; Y7]	Tensin-3 OS=Homo sapiens OX=9606 GN=TNS3 PE=1 SV=2	150844050	320785076	152467208
IGITNHDEYSLVR	1xPhospho [Y9]	Talin-1 OS=Homo sapiens OX=9606 GN=TLN1 PE=1 SV=3	2.19582e+07	25378764	16139245
IHYLDTTTLIEPVSR	1xPhospho [Y3]	Adapter molecule crk OS=Homo sapiens OX=9606 GN=CRK PE=1 SV=2	7.77945e+06	10033371	6.71508e+06
IPVIENPQYFR	1xPhospho [Y9]	NT-3 growth factor receptor OS=Homo sapiens OX=9606 GN=NTRK3 PE=1 SV=2	3.86142e+06	4.326e+06	2.91234e+06
LPYDVTPEQALAHEEVK	1xPhospho [Y/T]	Ras GTPase-activating-like protein IQGAP1 OS=Homo sapiens OX=9606 GN=IQGAP1 PE=1 SV=1	1.03216e+06	2.01593e+06	1.43158e+06
IQNTGDYYDLYGGEK	1xPhospho [Y/T]	Tyrosine-protein phosphatase non-receptor type 11 OS=Homo sapiens OX=9606 GN=PTPN11 PE=1 SV=3	65509725	8.27095e+07	43285007
IQVEYGVTGSFK	1xPhospho [Y5]	Phosphatidylinositol 4-phosphate 3-kinase C2 domain-containing subunit alpha OS=Homo sapiens OX=9606 GN=PIK3C2A PE=1 SV=2	1.46802e+06	1.39678e+06	1.1976e+06
IRPGEYEQFESTIGFK	1xPhospho [Y6]	Band 4.1-like protein 1 OS=Homo sapiens OX=9606 GN=EPB41L1 PE=1 SV=2	942828	1.50482e+06	1.13393e+06
IRYESLTDPSK	1xPhospho [Y/S]	Heat shock protein HSP 90-alpha OS=Homo sapiens OX=9606 GN=HSP90AA1 PE=1 SV=5;Heat shock protein HSP 90-beta OS=Homo sapiens OX=9606 GN=HSP90AB1 PE=1 SV=4	7.89229e+06	8.91361e+06	5633898
LPSSPVYEDAASFK	1xPhospho [S/Y]	Src substrate cortactin OS=Homo sapiens OX=9606 GN=CTTN PE=1 SV=2	9276538	9.1672e+06	9804241
LSHFEYVKNEDLEK	1xPhospho [Y6]	Activated CDC42 kinase 1 OS=Homo sapiens OX=9606 GN=TNK2 PE=1 SV=3	2873380	3145699	2.53357e+06
LSLGQYDNDAGGQLPFSK	1xPhospho [Y6]	Tensin-3 OS=Homo sapiens OX=9606 GN=TNS3 PE=1 SV=2	222748284	354017296	201409712
ISSYPEDNFPDEEK	1xPhospho [Y/S]	Mitogen-activated protein kinase kinase kinase kinase 5 OS=Homo sapiens OX=9606 GN=MAP4K5 PE=1 SV=2	11214569	12867176	8111040
ITLDNAYMEK	1xPhospho [Y7]	Pyruvate kinase PKM OS=Homo sapiens OX=9606 GN=PKM PE=1 SV=4	2595667	3.84511e+06	2.36113e+06
IVATKPLYVALAQR	1xPhospho [Y8]	Polyadenylate-binding protein 1 OS=Homo sapiens OX=9606 GN=PABPC1 PE=1 SV=2	5.3441e+06	6675129	3.62125e+06
LVECQYELTDR	1xCarbamidomethyl [C4]; 1xPhospho [Y6]	ARF GTPase-activating protein GIT1 OS=Homo sapiens OX=9606 GN=GIT1 PE=1 SV=2	2.98031e+06	3.87647e+06	1652431
LVNEAPVYSVYSK	1xPhospho [S/Y]	Signal transducing adapter molecule 2 OS=Homo sapiens OX=9606 GN=STAM2 PE=1 SV=1	1.61881e+07	1.86744e+07	1.18532e+07
LSLEGDHSTPPSAYGSVK	1xPhospho [Y/S]	Annexin A2 OS=Homo sapiens OX=9606 GN=ANXA2 PE=1 SV=2	39214188	45487540	35803180
LGYAVYETPTAHNGAK	1xPhospho [Y3]	Toll-interacting protein OS=Homo sapiens OX=9606 GN=TOLLIP PE=1 SV=1	6387736	8.1415e+06	5.16305e+06
LPLQDVYK	1xPhospho [Y7]	Elongation factor 1-alpha 2 OS=Homo sapiens OX=9606 GN=EEF1A2 PE=1 SV=1;Elongation factor 1-alpha 1 OS=Homo sapiens OX=9606 GN=EEF1A1 PE=1 SV=1	4872806	2.8024e+06	2.21306e+06
LPDGYEFKFPNR	1xPhospho [Y5]	Galectin-1 OS=Homo sapiens OX=9606 GN=LGALS1 PE=1 SV=2	4.08636e+06	4.25538e+06	2.60634e+06
LLAQAEGEPCYIR	1xCarbamidomethyl [C10]; 1xPhospho [Y11]	Non-receptor tyrosine-protein kinase TYK2 OS=Homo sapiens OX=9606 GN=TYK2 PE=1 SV=3	2.76359e+06	3.75654e+06	2797787
LLECLDYLTAPNPPTIR	1xCarbamidomethyl [C4]; 1xPhospho [Y/T]	E3 ubiquitin-protein ligase Midline-1 OS=Homo sapiens OX=9606 GN=MID1 PE=1 SV=1	928900	2.59275e+06	1.30981e+06
LIEDNEYTAR	1xPhospho [Y7]	Tyrosine-protein kinase Yes OS=Homo sapiens OX=9606 GN=YES1 PE=1 SV=3;Proto-oncogene tyrosine-protein kinase Src OS=Homo sapiens OX=9606 GN=SRC PE=1 SV=3	20502238	17645480	10895370
LLGSVDYDGINDAITR	1xPhospho [Y7]	Phosphatidylinositol 4-phosphate 3-kinase C2 domain-containing subunit beta OS=Homo sapiens OX=9606 GN=PIK3C2B PE=1 SV=2	2.16763e+06	3.09767e+06	1671229
IIQLLDDYPK	1xPhospho [Y8]	60S acidic ribosomal protein P0 OS=Homo sapiens OX=9606 GN=RPLP0 PE=1 SV=1	29243228	31293142	20970172
LISEIEYR	1xPhospho [Y7]	Palladin OS=Homo sapiens OX=9606 GN=PALLD PE=1 SV=3	8646254	7.93433e+06	5045112
LPELAPTAPLPYPAPEASGPPAVAPR	1xPhospho [Y12]	Vacuolar protein sorting-associated protein 37B OS=Homo sapiens OX=9606 GN=VPS37B PE=1 SV=1	1.01629e+06	2973807	1.68982e+06
LISWYDNEFGYSNR	1xPhospho [Y5]	Glyceraldehyde-3-phosphate dehydrogenase OS=Homo sapiens OX=9606 GN=GAPDH PE=1 SV=3	2.50248e+06	5.88525e+06	2.05017e+06
LIYDLKDQGGELLSLR	1xPhospho [Y3]	Histidine--tRNA ligase, cytoplasmic OS=Homo sapiens OX=9606 GN=HARS1 PE=1 SV=2	1.04879e+06	2.29662e+06	1.22062e+06
LIYLVPEK	1xPhospho [Y3]	Intersectin-2 OS=Homo sapiens OX=9606 GN=ITSN2 PE=1 SV=3	68409200	80169256	50153880
LMTGDTYTAHAGAK	1xPhospho [Y/T]	Tyrosine-protein kinase ABL1 OS=Homo sapiens OX=9606 GN=ABL1 PE=1 SV=4;Tyrosine-protein kinase ABL2 OS=Homo sapiens OX=9606 GN=ABL2 PE=1 SV=1	4.02845e+06	1.16703e+07	7.4732e+06
LMTGDTYTAHAGAK	1xPhospho [Y7]; 1xOxidation [M2]	Tyrosine-protein kinase ABL1 OS=Homo sapiens OX=9606 GN=ABL1 PE=1 SV=4;Tyrosine-protein kinase ABL2 OS=Homo sapiens OX=9606 GN=ABL2 PE=1 SV=1	3.0448e+06	2.98142e+06	1.01808e+06
LNFSHGTHEYHAETIK	1xPhospho [Y/T]	Pyruvate kinase PKM OS=Homo sapiens OX=9606 GN=PKM PE=1 SV=4	1.00086e+07	17320042	1.38083e+07
LPACVVDCGTGYTK	2xCarbamidomethyl [C4; C8]; 1xPhospho [Y/T]	Actin-related protein 3 OS=Homo sapiens OX=9606 GN=ACTR3 PE=1 SV=3	2.32233e+06	2.59756e+06	1.63102e+06
ILVGMYDK	1xPhospho [Y6]	Breast cancer anti-estrogen resistance protein 1 OS=Homo sapiens OX=9606 GN=BCAR1 PE=1 SV=2	2258235	3.01093e+06	1.76874e+06
KLSLGQYDNDAGGQLPFSK	1xPhospho [Y/S]	Tensin-3 OS=Homo sapiens OX=9606 GN=TNS3 PE=1 SV=2	214860198	348755800	2.23209e+08
KVVYENAYGQFIGPHR	1xPhospho [Y8]	Thioredoxin reductase 1, cytoplasmic OS=Homo sapiens OX=9606 GN=TXNRD1 PE=1 SV=3	8763012	12436792	7.85133e+06
GYYSPYSVSGSGSTAGSR	1xPhospho [Y/S]	Plectin OS=Homo sapiens OX=9606 GN=PLEC PE=1 SV=3	1.10992e+07	1.19561e+07	6.82222e+06
GSSQPNLSTSHSEQEYGK	1xPhospho [Y16]	Epsin-2 OS=Homo sapiens OX=9606 GN=EPN2 PE=1 SV=3	4.66697e+06	5.92548e+06	3.13433e+06
GSTAENAEYLR	1xPhospho [Y9]	Epidermal growth factor receptor OS=Homo sapiens OX=9606 GN=EGFR PE=1 SV=2	98180424	55992220	34653220
HRPELIEYDKLR	1xPhospho [Y8]	Alpha-actinin-4 OS=Homo sapiens OX=9606 GN=ACTN4 PE=1 SV=2	1.38097e+07	24700643	17643368
HRPELIEYDK	1xPhospho [Y8]	Alpha-actinin-4 OS=Homo sapiens OX=9606 GN=ACTN4 PE=1 SV=2	1.37531e+07	11163341	1.08902e+07
GVGYETILK	1xPhospho [Y4]	G-protein coupled receptor family C group 5 member C OS=Homo sapiens OX=9606 GN=GPRC5C PE=1 SV=2	3.38072e+06	3.58352e+06	2191821
HRPELIDYGK	1xPhospho [Y8]	Alpha-actinin-1 OS=Homo sapiens OX=9606 GN=ACTN1 PE=1 SV=2	6.7671e+07	8.09597e+07	5.29869e+07
HQSLSPNHPPPQLGQSVGSQNDAYDVPR	1xPhospho [Y24]	Enhancer of filamentation 1 OS=Homo sapiens OX=9606 GN=NEDD9 PE=1 SV=1	8.63554e+06	1.18322e+07	6.4458e+06
HPEIVGYSVPGR	1xPhospho [Y7]	Dynamin-binding protein OS=Homo sapiens OX=9606 GN=DNMBP PE=1 SV=1	7.57465e+06	9.71052e+06	6.17395e+06
HTDDEMTGYVATR	1xPhospho [Y9]	Mitogen-activated protein kinase 14 OS=Homo sapiens OX=9606 GN=MAPK14 PE=1 SV=3	1.6279e+07	15488359	10797653
GLPSDYGRPLSFPPPR	1xPhospho [S/Y]	Phosphatidylinositol 3,4,5-trisphosphate 5-phosphatase 2 OS=Homo sapiens OX=9606 GN=INPPL1 PE=1 SV=2	7.64247e+06	1.07917e+07	6743251
HGSGADSDYENTQSGDPLLGLEGK	1xPhospho [Y9]	ARF GTPase-activating protein GIT1 OS=Homo sapiens OX=9606 GN=GIT1 PE=1 SV=2	4647748	6699860	4.40286e+06
GVYAIPPSACR	1xCarbamidomethyl [C10]; 1xPhospho [Y3]	Enhancer of filamentation 1 OS=Homo sapiens OX=9606 GN=NEDD9 PE=1 SV=1	4.69505e+06	19538294	6578987
HGHYFVALFDYQAR	1xPhospho [Y4]	Tyrosine-protein kinase FRK OS=Homo sapiens OX=9606 GN=FRK PE=1 SV=1	982893	5.26314e+06	2.46447e+06
HGETFTFRDPHLLDPTVEYVK	1xPhospho [Y19]	Breast cancer anti-estrogen resistance protein 3 OS=Homo sapiens OX=9606 GN=BCAR3 PE=1 SV=1	34515131	99979007	5.32835e+07
HELQANCYEEVKDR	1xCarbamidomethyl [C7]; 1xPhospho [Y8]	Cofilin-1 OS=Homo sapiens OX=9606 GN=CFL1 PE=1 SV=3	11858858	14189990	8703833
GPSYGLSAEVK	1xPhospho [Y4]	Calponin-2 OS=Homo sapiens OX=9606 GN=CNN2 PE=1 SV=4	2380806	2.12484e+06	1.49782e+06
GYGYGQGAGTLSTDKGESLGIK	1xPhospho [Y]	Cysteine and glycine-rich protein 1 OS=Homo sapiens OX=9606 GN=CSRP1 PE=1 SV=3	6370456	4.8827e+06	3.18496e+06
GYSFTTTAER	1xPhospho [Y2]	Actin, cytoplasmic 1 OS=Homo sapiens OX=9606 GN=ACTB PE=1 SV=1	29519228	38087820	24898290
HLSPYATLTVGDSSHK	1xPhospho [Y5]	Extended synaptotagmin-1 OS=Homo sapiens OX=9606 GN=ESYT1 PE=1 SV=1	3.44692e+06	2.77175e+06	2464523
HVSPVTPPREVPIYANR	2xPhospho [T6; Y14]	Disintegrin and metalloproteinase domain-containing protein 9 OS=Homo sapiens OX=9606 GN=ADAM9 PE=1 SV=1	3547510	5.51175e+06	2974458
GSPHYFSPFRPY	1xPhospho [S/Y]	Serine/arginine-rich splicing factor 9 OS=Homo sapiens OX=9606 GN=SRSF9 PE=1 SV=1	3.78227e+09	4785519139	4.32776e+09
GLCTSPAEHQYFMTEYVATR	1xCarbamidomethyl [C3]; 1xPhospho [T/Y]; 1xOxidation [M13]	Mitogen-activated protein kinase 7 OS=Homo sapiens OX=9606 GN=MAPK7 PE=1 SV=2	9.89482e+07	112137966	8.94556e+07
GLCTSPAEHQYFMTEYVATR	1xCarbamidomethyl [C3]; 1xPhospho [Y/T]	Mitogen-activated protein kinase 7 OS=Homo sapiens OX=9606 GN=MAPK7 PE=1 SV=2	1.41576e+08	256288835	191327615
KIEIGDGAELTAEFLYDEVHPK	1xPhospho [Y16]	Twinfilin-2 OS=Homo sapiens OX=9606 GN=TWF2 PE=1 SV=2	2.32543e+06	11711239	6669938
KIEIDNGDELTADFLYEEVHPK	1xPhospho [Y16]	Twinfilin-1 OS=Homo sapiens OX=9606 GN=TWF1 PE=1 SV=3	5.23586e+06	11382996	5.3523e+06
KKYEPPVPTR	1xPhospho [Y3]	26S proteasome regulatory subunit 4 OS=Homo sapiens OX=9606 GN=PSMC1 PE=1 SV=1	4.15056e+06	5243874	3.59504e+06
GPLDGSPYAQVQRPPR	1xPhospho [Y8]	Tensin-2 OS=Homo sapiens OX=9606 GN=TNS2 PE=1 SV=2	3.20138e+07	4.15802e+07	2.77447e+07
GQPIYIQFSNHK	1xPhospho [Y5]	Polypyrimidine tract-binding protein 1 OS=Homo sapiens OX=9606 GN=PTBP1 PE=1 SV=1	6.87045e+06	5843920	3.19533e+06
GQTPYPGVENSEIYDYLR	1xPhospho [Y]	Tyrosine-protein kinase receptor UFO OS=Homo sapiens OX=9606 GN=AXL PE=1 SV=4	1.26294e+06	4.28795e+06	1.84038e+06
KGSGDYMPMSPK	1xPhospho [Y6]	Insulin receptor substrate 1 OS=Homo sapiens OX=9606 GN=IRS1 PE=1 SV=1	2285175	4647734	3.22892e+06
GSIDREDGSLQGPIGNQHIYQPVGKPDPAAPPK	1xPhospho [Y20]	Focal adhesion kinase 1 OS=Homo sapiens OX=9606 GN=PTK2 PE=1 SV=2	8584057	11085361	8.01528e+06
KDYFDMFAPK	1xPhospho [Y3]	Paxillin OS=Homo sapiens OX=9606 GN=PXN PE=1 SV=3	1.35316e+06	3317468	1.83641e+06
GIVVYTGDR	1xPhospho [Y/T]	Sodium/potassium-transporting ATPase subunit alpha-1 OS=Homo sapiens OX=9606 GN=ATP1A1 PE=1 SV=1	29800870	34169728	25521922
KDNDFIYHDRVPDLK	1xPhospho [Y7]	Programmed cell death 6-interacting protein OS=Homo sapiens OX=9606 GN=PDCD6IP PE=1 SV=1	7540761	1.25629e+07	8.70642e+06
GIGMNEPLVDCEGYPR	1xCarbamidomethyl [C11]; 1xPhospho [Y14]	26S proteasome non-ATPase regulatory subunit 9 OS=Homo sapiens OX=9606 GN=PSMD9 PE=1 SV=3	1.76368e+06	7.60345e+06	4.76113e+06
KAQLDYVDLYLIHSPMSLKPGEELSPTDENGK	1xPhospho [Y6]	Aldo-keto reductase family 1 member C3 OS=Homo sapiens OX=9606 GN=AKR1C3 PE=1 SV=4	2.44542e+06	12986882	5224617
GSHQISLDNPDYQQDFFPK	1xPhospho [Y12]	Epidermal growth factor receptor OS=Homo sapiens OX=9606 GN=EGFR PE=1 SV=2	2.94958e+07	5.02179e+07	2.7181e+07
HYSVVLPTVSHSGFLYK	1xPhospho [Y2]	Arf-GAP with Rho-GAP domain, ANK repeat and PH domain-containing protein 1 OS=Homo sapiens OX=9606 GN=ARAP1 PE=1 SV=3	21401856	45925620	20864104
HYGGLTGLNK	1xPhospho [Y2]	Phosphoglycerate mutase 1 OS=Homo sapiens OX=9606 GN=PGAM1 PE=1 SV=2	49138747	5.14315e+07	3.59979e+07
GQYHTLQAGFSSR	1xPhospho [Y3]	Plakophilin-3 OS=Homo sapiens OX=9606 GN=PKP3 PE=1 SV=1	8.64284e+06	1.0265e+07	7.12424e+06
SHYFEGVLK	1xPhospho [Y3]	5'-AMP-activated protein kinase subunit gamma-1 OS=Homo sapiens OX=9606 GN=PRKAG1 PE=1 SV=1	2.19561e+06	3.1504e+06	1.76837e+06
STYTSYPK	1xPhospho [Y]	Hepatocyte growth factor-regulated tyrosine kinase substrate OS=Homo sapiens OX=9606 GN=HGS PE=1 SV=1	108071480	40456713	23390411
LYTYIQSR	1xPhospho [Y4]	Dual specificity tyrosine-phosphorylation-regulated kinase 3 OS=Homo sapiens OX=9606 GN=DYRK3 PE=1 SV=3	43393904	52873096	27557338
MPEQEYEFPEPR	1xPhospho [Y6]; 1xOxidation [M1]	Anthrax toxin receptor 1 OS=Homo sapiens OX=9606 GN=ANTXR1 PE=1 SV=2	2.7272e+06	2.48605e+06	2.20107e+06
EYAQVFR	1xPhospho [Y2]	Catenin alpha-1 OS=Homo sapiens OX=9606 GN=CTNNA1 PE=1 SV=1	3.86491e+06	3125359	2.2342e+06
AYDHLFK	1xPhospho [Y2]	Ras-related protein Rab-13 OS=Homo sapiens OX=9606 GN=RAB13 PE=1 SV=1	10632375	4557228	2.68967e+06
GIYAVGDVCGK	1xCarbamidomethyl [C9]; 1xPhospho [Y3]	Glutathione reductase, mitochondrial OS=Homo sapiens OX=9606 GN=GSR PE=1 SV=2	2.28209e+06	3.22456e+06	1091633
GYIDLSK	1xPhospho [Y2]	Eukaryotic translation initiation factor 2 subunit 1 OS=Homo sapiens OX=9606 GN=EIF2S1 PE=1 SV=3	2.29987e+06	3.06391e+06	2.0926e+06
FAVPTYAAK	1xPhospho [Y6]	Disintegrin and metalloproteinase domain-containing protein 9 OS=Homo sapiens OX=9606 GN=ADAM9 PE=1 SV=1	12124426	16006113	10024476
QIYYSDK	1xPhospho [Y3]	Cyclin-dependent kinases regulatory subunit 2 OS=Homo sapiens OX=9606 GN=CKS2 PE=1 SV=1;Cyclin-dependent kinases regulatory subunit 1 OS=Homo sapiens OX=9606 GN=CKS1B PE=1 SV=1	4.99934e+06	2.87792e+06	1.79799e+06
ALDYYMLR	1xPhospho [Y4]; 1xOxidation [M6]	Talin-1 OS=Homo sapiens OX=9606 GN=TLN1 PE=1 SV=3	17042066	21293140	14682936
KTAGLSDLY	1xPhospho [Y9]	Tumor susceptibility gene 101 protein OS=Homo sapiens OX=9606 GN=TSG101 PE=1 SV=2	4.4008e+06	4.00511e+06	3240129
ACYGVLR	1xCarbamidomethyl [C2]; 1xPhospho [Y3]	40S ribosomal protein S3 OS=Homo sapiens OX=9606 GN=RPS3 PE=1 SV=2	4034602	4.32474e+06	2.21956e+06
GHEYTNIK	1xPhospho [Y4]	Tyrosine-protein phosphatase non-receptor type 11 OS=Homo sapiens OX=9606 GN=PTPN11 PE=1 SV=3	1.61346e+07	7.79285e+06	2.11493e+06
AYPLDSLEK	1xPhospho [Y2]	Rab GTPase-binding effector protein 2 OS=Homo sapiens OX=9606 GN=RABEP2 PE=1 SV=2	2728712	3.60272e+06	2.06341e+06
ELNYFAK	1xPhospho [Y4]	Phosphoglycerate kinase 1 OS=Homo sapiens OX=9606 GN=PGK1 PE=1 SV=3	4457226	4.17545e+06	2.96389e+06
KGYSYELK	1xPhospho [Y3]	Guanine nucleotide exchange factor VAV2 OS=Homo sapiens OX=9606 GN=VAV2 PE=1 SV=2	7468293	8.27912e+06	3527899
LASYLDR	1xPhospho [Y4]	Keratin, type I cytoskeletal 18 OS=Homo sapiens OX=9606 GN=KRT18 PE=1 SV=2	6.20666e+06	7496610	3.95242e+06
LYDAYELK	1xPhospho [Y5]	Annexin A5 OS=Homo sapiens OX=9606 GN=ANXA5 PE=1 SV=2	15507076	22278992	13064594
GYVPATIK	1xPhospho [Y2]	Signal transducer and activator of transcription 6 OS=Homo sapiens OX=9606 GN=STAT6 PE=1 SV=1	7.07738e+06	5980020	4.14551e+06
TVYFAEK	1xPhospho [Y3]	Cysteine-rich protein 2 OS=Homo sapiens OX=9606 GN=CRIP2 PE=1 SV=1	2121430	2.12279e+06	1.60168e+06
GMIPVPYVEK	1xPhospho [Y7]	Adapter molecule crk OS=Homo sapiens OX=9606 GN=CRK PE=1 SV=2	1.40548e+06	3.64582e+06	2065725
LYDFVK	1xPhospho [Y2]	Phosphatidylinositol 3,4,5-trisphosphate 5-phosphatase 1 OS=Homo sapiens OX=9606 GN=INPP5D PE=1 SV=2	1.99487e+06	2.72267e+06	2192422
VYALYR	1xPhospho [Y2]	E3 ubiquitin-protein ligase ZNF598 OS=Homo sapiens OX=9606 GN=ZNF598 PE=1 SV=1	1.83032e+06	1.49162e+06	942287
LSEAYSR	1xPhospho [S/Y]	Breast cancer anti-estrogen resistance protein 3 OS=Homo sapiens OX=9606 GN=BCAR3 PE=1 SV=1	1.13118e+07	3.73455e+06	1209516
QGYVIYR	1xPhospho [Y3]	60S ribosomal protein L15 OS=Homo sapiens OX=9606 GN=RPL15 PE=1 SV=2	24481926	22291870	15241271
SFLDSGYR	1xPhospho [Y7]	Vinculin OS=Homo sapiens OX=9606 GN=VCL PE=1 SV=4	413824448	538690048	328924544
IDHYLGK	1xPhospho [Y4]	Glucose-6-phosphate 1-dehydrogenase OS=Homo sapiens OX=9606 GN=G6PD PE=1 SV=4	7365632	3177288	3166906
EYVDLER	1xPhospho [Y2]	Core-binding factor subunit beta OS=Homo sapiens OX=9606 GN=CBFB PE=1 SV=2	7314407	7.57014e+06	5.44739e+06
KYFSLKPEEKDEK	1xPhospho [Y2]	CD2-associated protein OS=Homo sapiens OX=9606 GN=CD2AP PE=1 SV=1	1.57031e+06	1479807	1.5425e+06
EGDPAIYAER	1xPhospho [Y7]	Testin OS=Homo sapiens OX=9606 GN=TES PE=1 SV=1	2308938	1.51748e+06	766325
AYYLPK	1xPhospho [Y2]	Calcium-binding and coiled-coil domain-containing protein 2 OS=Homo sapiens OX=9606 GN=CALCOCO2 PE=1 SV=1	4.84419e+06	5794765	3.75398e+06
YGTDLSR	1xPhospho [Y1]	Sodium/potassium-transporting ATPase subunit alpha-1 OS=Homo sapiens OX=9606 GN=ATP1A1 PE=1 SV=1	1.45836e+07	8.70197e+06	4.46338e+06
YLYVDK	1xPhospho [Y]	Myosin-9 OS=Homo sapiens OX=9606 GN=MYH9 PE=1 SV=4	8624348	8.3664e+06	5.60543e+06
ALGYMER	1xPhospho [Y4]	General transcription factor 3C polypeptide 3 OS=Homo sapiens OX=9606 GN=GTF3C3 PE=1 SV=1	9895132	8352875	5337275
LYEEYTR	1xPhospho [Y2]	Phosphatidylinositol 3-kinase regulatory subunit alpha OS=Homo sapiens OX=9606 GN=PIK3R1 PE=1 SV=2	31007738	18363760	9917960
QVAYIYK	1xPhospho [Y6]	Adenylyl cyclase-associated protein 1 OS=Homo sapiens OX=9606 GN=CAP1 PE=1 SV=5	2981532	3309461	3.0244e+06
TPPPYSVYER	1xPhospho [Y8]	Dedicator of cytokinesis protein 4 OS=Homo sapiens OX=9606 GN=DOCK4 PE=1 SV=3	2.10218e+06	2.26022e+06	1.14122e+06
VPCAYDK	1xCarbamidomethyl [C3]; 1xPhospho [Y5]	Crk-like protein OS=Homo sapiens OX=9606 GN=CRKL PE=1 SV=1	7.8131e+06	1.21646e+06	950211
AEEVEYYYR	1xPhospho [Y]	Kinesin light chain 2 OS=Homo sapiens OX=9606 GN=KLC2 PE=1 SV=1	1.14004e+06	1.45637e+06	595626
ALYEAGER	1xPhospho [Y3]	Annexin A1 OS=Homo sapiens OX=9606 GN=ANXA1 PE=1 SV=2	3050069	1.50575e+06	931317
LMYQELK	1xPhospho [Y3]	5'-3' exonuclease PLD3 OS=Homo sapiens OX=9606 GN=PLD3 PE=1 SV=1	4355975	8775489	4.46652e+06
STFSTNYR	1xPhospho [Y7]	Keratin, type I cytoskeletal 18 OS=Homo sapiens OX=9606 GN=KRT18 PE=1 SV=2	34619116	23499046	1.55898e+07
FANYIDK	1xPhospho [Y4]	Vimentin OS=Homo sapiens OX=9606 GN=VIM PE=1 SV=4	28259516	30665430	19321684
EVSTYIK	1xPhospho [Y5]	Elongation factor 1-alpha 1 OS=Homo sapiens OX=9606 GN=EEF1A1 PE=1 SV=1	4906819	4.30827e+06	2.65017e+06
LVPVGYGIR	1xPhospho [Y6]	Elongation factor 1-delta OS=Homo sapiens OX=9606 GN=EEF1D PE=1 SV=5	9088374	10573252	6.64718e+06
LVPVGYGIK	1xPhospho [Y6]	Elongation factor 1-beta OS=Homo sapiens OX=9606 GN=EEF1B2 PE=1 SV=3	3.69923e+06	3.81079e+06	2.22912e+06
IEGVYAR	1xPhospho [Y5]	60S ribosomal protein L35a OS=Homo sapiens OX=9606 GN=RPL35A PE=1 SV=2	35545520	29012940	18127800
LVYDGIR	1xPhospho [Y3]	Catenin alpha-1 OS=Homo sapiens OX=9606 GN=CTNNA1 PE=1 SV=1	10874323	13989548	7262509
DTLYEAVR	1xPhospho [Y4]	60S ribosomal protein L10a OS=Homo sapiens OX=9606 GN=RPL10A PE=1 SV=2	18265928	31562566	16505501
YFTTNK	1xPhospho [Y1]	AP-2 complex subunit beta OS=Homo sapiens OX=9606 GN=AP2B1 PE=1 SV=1	30888648	14857658	8.49307e+06
QHYIDLK	1xPhospho [Y3]	Nucleoside diphosphate kinase B OS=Homo sapiens OX=9606 GN=NME2 PE=1 SV=1	19243044	22154606	14124749
QIYVGR	1xPhospho [Y3]	Polyadenylate-binding protein 1 OS=Homo sapiens OX=9606 GN=PABPC1 PE=1 SV=2	9.54605e+06	8589732	5266996
YLDIPK	1xPhospho [Y1]	Alpha-actinin-1 OS=Homo sapiens OX=9606 GN=ACTN1 PE=1 SV=2;Alpha-actinin-4 OS=Homo sapiens OX=9606 GN=ACTN4 PE=1 SV=2	17053028	23809322	14999799
TTILYK	1xPhospho [Y5]	ADP-ribosylation factor 3 OS=Homo sapiens OX=9606 GN=ARF3 PE=1 SV=2	1.4162e+06	1.90585e+06	812764
EVYFAER	1xPhospho [Y3]	Cysteine-rich protein 1 OS=Homo sapiens OX=9606 GN=CRIP1 PE=1 SV=3	75318592	73988336	48871800
YVLARP	1xPhospho [Y1]	Non-receptor tyrosine-protein kinase TNK1 OS=Homo sapiens OX=9606 GN=TNK1 PE=1 SV=3	7243890	9017436	6406273
SILYDER	1xPhospho [Y4]	Proteasome subunit alpha type-2 OS=Homo sapiens OX=9606 GN=PSMA2 PE=1 SV=2	9194915	9912372	7.3347e+06
EKLYDFVK	1xPhospho [Y4]	Phosphatidylinositol 3,4,5-trisphosphate 5-phosphatase 1 OS=Homo sapiens OX=9606 GN=INPP5D PE=1 SV=2	2.71549e+06	2978235	1.73493e+06
EVPIYANR	1xPhospho [Y5]	Disintegrin and metalloproteinase domain-containing protein 9 OS=Homo sapiens OX=9606 GN=ADAM9 PE=1 SV=1	21760326	25493254	15245426
GVPLYR	1xPhospho [Y5]	Alpha-enolase OS=Homo sapiens OX=9606 GN=ENO1 PE=1 SV=2	1.92201e+06	2798483	903362
GYLPLPR	1xPhospho [Y2]	Feline leukemia virus subgroup C receptor-related protein 1 OS=Homo sapiens OX=9606 GN=FLVCR1 PE=1 SV=1	1926897	2.29597e+06	988684
DKLNTQSTYSEA	1xPhospho [Y9]	Neuropilin-1 OS=Homo sapiens OX=9606 GN=NRP1 PE=1 SV=3	7.73183e+06	3419452	2.10584e+06
LMYQELK	1xPhospho [Y3]; 1xOxidation [M2]	5'-3' exonuclease PLD3 OS=Homo sapiens OX=9606 GN=PLD3 PE=1 SV=1	5155444	5.21741e+06	3.53303e+06
IFYDMK	1xPhospho [Y3]	Destrin OS=Homo sapiens OX=9606 GN=DSTN PE=1 SV=3	4558679	8473763	8.31084e+06
YNFAAR	1xPhospho [Y1]	Guanine nucleotide exchange factor VAV2 OS=Homo sapiens OX=9606 GN=VAV2 PE=1 SV=2	4.34398e+06	12568017	4.98216e+06
FKQYLR	1xPhospho [Y4]	SHC-transforming protein 1 OS=Homo sapiens OX=9606 GN=SHC1 PE=1 SV=4	46013436	50244032	34078117

## Sheet: Table 4.3
Table 4.3: SureQuant pTyr replicate analysis of Tumor 32
Values are light/heavy ratios of top 3 transitions for each peptide
	Analysis #
Modified Sequence	1	2	3			Associated files
ADY[+80]DTLSLR	0.000562013	0.000582041	0.000618314			Analysis #	Filename
AEDGSVIDY[+80]ELIDQDAR	7.94908e-05	0.00026255	0.000243134			1	Tumor32_pTyr_SQ_1.raw
AGSLPNY[+80]ATINGK	7.24977e-05	6.48207e-05	7.01337e-05			2	Tumor32_pTyr_SQ_2.raw
ALDY[+80]YMLR	0.00105938	0.00126389	0.00136014			3	Tumor32_pTyr_SQ_3.raw
ALELDSNLY[+80]R	0.000879745	0.000713872	0.000793268
ALPQNDDHY[+80]VMQEHR	0.000228587	0.000276154	0.000361889
AQQGLY[+80]QVPGPSPQFQSPPAK	0.000222818	0.000201367	0.000223686
AQY[+80]EDIANR	0.000511443	0.000525828	0.00055803
AY[+80]TNFDAER	0.167321	0.144411	0.126183
AY[+80]TNFDAERDALNIETAIK	0.000751035	0.000558289	0.000408456
DDGMEEVVGHTQGPLDGSLY[+80]AK	0.00605582	0.00931506	0.00893381
DGHPLSPERDHLEGLY[+80]AK	0.000165335	0.000191732	0.000181356
DHLEGLY[+80]AK	0.00028746	0.000288696	0.000289452
DLEY[+80]LDLK	0.000362952	0.000391979	0.000395788
DPHYQDPHSTAVGNPEY[+80]LNTVQPTC[+57]VNSTFDSPAHWAQK	0.00840374	0.00566439	0.00613393
DQY[+80]LMWLTQK	0.000405014	0.000451363	0.000509789
DSSTSPGDY[+80]VLSVSENSR	0.00436169	0.005704	0.00545585
DSTY[+80]DLPR	0.0015825	0.00143384	0.00153812
DVTIGGSAPIY[+80]VK	0.000691681	0.000668519	0.000729826
DWSHY[+80]FK	0.00106269	0.00122923	0.0013643
DY[+80]HFVTSR	0.000528496	0.000577086	0.000541362
DY[+80]STLTSVSSHDSR	0.000648667	0.000592565	0.000633792
EAAY[+80]HPEVAPDVR	0.000151725	0.000162666	0.00016138
EATQPEPIY[+80]AESTK	0.00015773	0.000165597	0.000159068
EC[+57]DY[+80]SIDGINR	0.000282864	0.00026937	0.000258251
EEPEALY[+80]AAVNK	0.000124273	0.000125392	0.000109529
EEPIY[+80]IITEYMAK	0.000696898	0.000755552	0.000675012
EEY[+80]DVLDK	0.000144348	0.000144242	0.000141696
EIDVSY[+80]VK	0.000367497	0.000417748	0.000377568
EIENLTQQY[+80]EEK	0.00046681	0.000555945	0.00293312
ELY[+80]GEVIR	0.00202531	0.00194715	0.00178376
EQY[+80]DVPQEWR	0.000839812	0.00107801	0.00120193
EVPIY[+80]ANR	0.000598516	0.000704447	0.000695615
FANY[+80]IDK	0.000888953	0.00121298	0.001081
FANY[+80]IEK	0.000275051	0.000310032	0.000294572
FASEASGY[+80]QDNIAR	0.000273879	0.000323161	0.00028618
FAVPTY[+80]AAK	0.00162321	0.00181624	0.00198302
FEEPAPLSY[+80]DSRPR	6.05077e-05	7.13713e-05	6.05507e-05
FHPEPY[+80]GLEDDQR	0.000213077	0.00015067	0.000196414
FLEDDPSDPTY[+80]TSSLGGK	0.000787403	0.00088342	0.000925916
FQKEIENLTQQY[+80]EEK	0.000355957	0.00029475	0.000331377
GAY[+80]SLSIR	0.00173638	0.00167234	0.00189771
GDY[+80]PLEAVR	0.00151877	0.00175913	0.00163447
GEPNVSY[+80]IC[+57]SR	0.031921	0.0401131	0.0407765
GHDGLY[+80]QGLSTATK	0.000692622	0.000527388	0.000643584
GHEY[+80]TNIK	0.000830004	0.000861698	0.000865831
GIVVY[+80]TGDR	0.000426714	0.000395136	0.000424481
GLIDRDLY[+80]R	0.000465734	0.000458522	0.000423752
GPAVGIY[+80]NDNINTEMPR	0.000222551	0.000248249	0.000309752
GPAY[+80]GLSAEVK	0.000201246	0.000172131	0.000299883
GQEATDTEY[+80]SEIK	0.000292404	0.000249427	0.000305264
GY[+80]AYVEFENPDEAEK	0.000441714	0.00059338	0.000542705
GY[+80]FFLDER	0.000987641	0.000933035	0.000953217
HADAEMT[+80]GY[+80]VVTR	0.000648945	0.000492815	0.000809295
HELQANC[+57]Y[+80]EEVKDR	0.000242003	0.000396948	0.00028574
HPAGVY[+80]QVSGLHNK	0.000138027	0.000143217	0.000144369
HPDIY[+80]AVPIK	0.000284858	0.000274047	0.000314786
IAIY[+80]ELLFK	0.000106627	0.000105526	9.87041e-05
IIQLLDDY[+80]PK	0.000870973	0.000908698	0.000887799
IQNTGDY[+80]YDLYGGEK	0.000425501	0.00117781	0.00140982
IYIDPFTY[+80]EDPNEAVR	7.70493e-05	7.71352e-05	8.22316e-05
IYNGDY[+80]YR	0.00053293	0.00055049	0.000541997
IYQY[+80]IQSR	0.37141	0.428393	0.43961
IY[+80]EPLDVK	0.00017978	0.000190736	0.000167415
KNPQEGLY[+80]NELQK	0.000342988	0.000345793	0.000386003
KPTY[+80]DPVSEDQDPLSSDFKR	0.000216756	0.000235722	0.000246884
LC[+57]DFGSASHVADNDITPY[+80]LVSR	0.0375972	0.0423365	0.0426617
LDNGGY[+80]YITTR	0.000206801	0.00022604	0.000239348
LGEGTY[+80]ATVYK	6.17394e-05	7.50668e-05	7.25537e-05
LHEY[+80]NTQFQEK	0.000203211	0.00022895	0.000210436
LIEDNEY[+80]TAR	0.00142131	0.00162034	0.0017194
LIY[+80]LVPEK	0.000394085	0.000395161	0.000383717
LLDDFDGTY[+80]ETQGGK	0.000208685	0.000250596	0.000277543
LPSSPVY[+80]EDAASFK	0.000142245	0.000147635	0.000160918
LQQY[+80]IAPGMK	0.000820167	0.000919782	0.000917
LVNEAPVYSVY[+80]SK	0.000195882	0.000178353	0.000191252
LYSNAY[+80]LNDLAGC[+57]IK	0.000228065	0.000186206	0.000255146
LY[+80]AVVTR	0.00266114	0.00465096	0.00439008
LY[+80]DFVK	0.0386004	0.041435	0.0598016
LY[+80]EEYTR	0.000423478	0.000420384	0.000431452
NLIY[+80]DNADNK	0.00111848	0.0013028	0.000992613
NPGFY[+80]VEANPMPTFK	0.000309039	0.000241988	0.000228465
NPGNQAAY[+80]EHFETMK	0.00496126	0.00586125	0.00598641
NPQEGLY[+80]NELQK	0.000111273	9.70944e-05	0.000118671
NQETY[+80]ETLKHEKPPQ	0.000360609	0.000391875	0.000472802
NY[+80]VTPVNR	0.000518657	0.000544434	0.000602936
QADSEMTGY[+80]VVTR	0.00351452	0.00381324	0.0040394
QESTVSFNPY[+80]EPELAPWAADKGPQR	0.000105865	0.000113797	0.000126598
QLLY[+80]SENK	0.000994814	0.00100378	0.00102113
QTLLPNDQLY[+80]QPLK	0.000102043	0.000138908	0.000141465
REEPEALY[+80]AAVNK	0.000230151	0.00021422	0.000227334
RIEY[+80]IEAR	0.00210755	0.00242511	0.00237274
RPAGSVQNPVY[+80]HNQPLNPAPSR	0.000221916	0.000244843	0.000196896
SAEEAPLY[+80]SK	0.000263891	0.000290221	0.000287856
SDSASSEPVGIY[+80]QGFEK	0.000191905	0.000185851	0.000199901
SDVY[+80]SDLNTQRPYYK	0.000253245	0.000264436	0.000240904
SEDIY[+80]ADPAAYVMR	0.000329191	0.000329501	0.000310069
SFLDSGY[+80]R	0.4639	0.568883	0.613899
SGDLPY[+80]DGR	0.000214697	0.000264965	0.000264377
SLDNGGYY[+80]ISPR	0.000116783	0.000131277	0.00014916
SLDNNY[+80]STPNER	7.99667e-05	9.16198e-05	8.65614e-05
SLYASSPGGVY[+80]ATR	0.00231922	0.00258193	0.00256137
SLY[+80]HDISGDTSGDYR	0.00756607	0.00871515	0.00863295
SNHY[+80]DPEEDEEYYR	0.103138	0.0939146	0.089285
SNHY[+80]DPEEDEEYYRK	0.000103516	9.50333e-05	9.55851e-05
STGPGASLGTGY[+80]DR	0.00122576	0.00157591	0.00141754
SVNESLNNLFITEEDY[+80]QALR	0.000172332	0.000142779	0.000231307
SYSPY[+80]DMLESIR	0.226407	0.284569	0.285138
TATESFASDPILY[+80]RPVAVALDTK	0.000194063	0.000255242	0.000265423
TEELIY[+80]LSQK	0.000132604	0.000148492	0.00014299
TSIDAY[+80]DNFDNISLAQR	0.000453505	0.00041203	0.000450293
TYVDPHTY[+80]EDPNQAVLK	0.000319374	0.000353646	0.000366922
TY[+80]DMLK	0.000327231	0.000358456	0.00040015
TY[+80]VDPHTYEDPNQAVLK	0.000729311	0.00065646	0.00073323
VADPDHDHTGFLTEY[+80]VATR	0.0422761	0.0532946	0.0387409
VADPDHDHTGFLT[+80]EY[+80]VATR	0.00116137	0.00113927	0.000979334
VENC[+57]PDELY[+80]DIMK	0.000696906	0.000794699	0.000788858
VGEEEHVY[+80]SFPNK	0.000366675	0.000353248	0.000362242
VGFQY[+80]EGTYK	0.00134758	0.00147201	0.00147405
VIEDNEY[+80]TAR	0.00236738	0.00292193	0.00289626
VIY[+80]DFIEK	0.000622311	0.000606989	0.000635713
VLEDDPEATY[+80]TTSGGK	0.000418719	0.000520996	0.000502911
VQIY[+80]HNPTANSFR	0.000623311	0.000724002	0.000731278
VSEKPSADY[+80]VLSVR	0.00127467	0.00115693	0.00123558
VTIADDY[+80]SDPFDAK	0.000110338	0.000122126	0.000107346
VVY[+80]SAPR	0.00354102	0.00442746	0.00422361
VYTY[+80]IQSR	0.000304308	0.000336342	0.000344134
VY[+80]ENVGLMQQQK	0.000950461	0.000267729	0.000793334
WDTGENPIY[+80]K	0.000373767	0.000433568	0.000427288
WTAPEAALY[+80]GR	6.81756e-05	8.63024e-05	7.79633e-05
YC[+57]RPESQEHPEADPGSAAPY[+80]LK	0.0202808	0.024655	0.0237947
YHGHSMSDPGVSY[+80]R	0.00026676	0.000303568	0.000310031
YIEDEDYY[+80]KASVTR	0.00106961	0.000904922	0.00102011
YSSDPTGALTEDSIDDTFLPVPEY[+80]INQSVPK	0.000504835	0.000202261	0.000139584
YTEFY[+80]HVPTHSDASK	8.86782e-05	8.19239e-05	8.41934e-05
YTY[+80]SEWHSFTQPR	0.000193825	0.000222118	0.000222873
YVDSEGHLY[+80]TVPIR	0.000550991	0.00068509	0.000750154
YVLDDEY[+80]TSSVGSK	9.41204e-05	8.47353e-05	0.000131442
YYGY[+80]TGAFR	0.0036184	0.00461732	0.00423976
Y[+80]AALSDQGLDIK	8.92782e-05	0.000122544	9.7997e-05
Y[+80]ANVIAYDHSR	0.000150926	0.000245747	0.000172802
Y[+80]ATPQVIQAPGPR	0.000190136	0.000202556	0.000184044
Y[+80]LVIQGDER	0.00102723	0.00103086	0.00101062
Y[+80]QQPFEDFR	0.00198215	0.00210614	0.0019572
Y[+80]SSDPTGALTEDSIDDTFLPVPEY[+80]INQSVPK	0.000246229	0.000324505	0.000188586
