# Supplementary material for: High-Density, Targeted Monitoring of Tyrosine Phosphorylation Reveals Activated Signaling Networks in Human Tumors
Source: Oxford University Press journal article supplement (doi:10.1158/0008-5472.can-20-3804), 2021-01-28
Supplement: 00085472can203804-sup-255483_2_supp_6838244_qmsgw0.xlsx [file 00085472can203804-sup-255483_2_supp_6838244_qmsgw0.xlsx]

## Sheet: S5
Supplementary Table S5: Quantitative dynamics comparison between SureQuant pTyr, PRM, and DDA
Table S5.1	TMT Labeling scheme for DDA A549 experiment
Table S5.2	TMT-labeled DDA experiment of A549 cells stimulated with EGF for 0, 0.5, or 2 minutes.
Table S5.3	Targets for PRM analysis
Table S5.4	PRM experiment of A549 cells situlated with 0, 0.5, or 2 mins EGF
Table S5.5	SureQuant pTyr L/H ratios for analysis of A549 cells stimulated for 0, 0.5, or 2 mins with EGF.

## Sheet: Table 5.1
Table 5.1: TMT Labeling scheme for DDA A549 experiment
Sample name: Xm denotes duration of EGF stimulation in minutes, RX denotes replicate number
TMT10-label	Sample
126	0m R1
127C	0m R2
127N	0m R3
128C	0.5m R1
128N	0.5m R2
129C	0.5m R3
129N	2m R1
130C	2m R2
130N	2m R3
131	X
X = not used

## Sheet: Table 5.2
Table 5.2: TMT-labeled DDA experiment of A549 cells stimulated with EGF for 0, 0.5, or 2 minutes.
Values are Log2 (fold change) over average 0 s reporter ion intensity
Labeling scheme is described in Table 4.1
Modified amino acids are indicated by a lowercase letter in "Annotated Sequence"
Annotated Sequence	Modifications	Gene IDs	Protein Descriptions	Gene-Sites	0m R1	0m R2	0m R3	0.5m R1	0.5m R2	0.5m R3	2m R1	2m R2	2m R3
aDDPyAHLSk	N-Term(TMT6plex); Y5(Phospho); K10(TMT6plex)	ABCF1	ATP-binding cassette sub-family F member 1	ABCF1-pY250	0.321701	-0.633577	0.144856	-0.273258	1.045	0.643832	2.16352	1.58139	1.53095
tLEPVRPPVVPNDyVPSPTR	N-Term(TMT6plex); Y14(Phospho)	ABI2	Abl interactor 2	ABI2-pY213	-0.270605	-0.145336	0.341257	1.10907	1.16186	0.907834	0.79134	1.07193	0.750205
vyVTAESR	N-Term(TMT6plex); Y2(Phospho)	ABL2	Tyrosine-protein kinase ABL2	ABL2-pY231	0.0171164	0.0315214	-0.0499412	-0.128737	-0.307993	-0.311853	-0.126665	-0.693404	-0.388745
eGDyVLFHHEGGVDVGDVDAk	N-Term(TMT6plex); Y4(Phospho); K21(TMT6plex)	ACLY	ATP-citrate synthase	ACLY-pY131	0.127396	-0.00908541	-0.129801	0.154584	-0.0869635	0.240268	0.21328	0.283361	0.448271
tTDGVyEGVAIGGDR	N-Term(TMT6plex); Y6(Phospho)	ACLY	ATP-citrate synthase	ACLY-pY682	0.16438	-0.0710365	-0.108796	-0.469941	-0.383925	-0.273943	-0.0297284	-0.0684481	0.00286552
gySFTTTAER	N-Term(TMT6plex); Y2(Phospho)	ACTB; ACTG1	Actin, cytoplasmic 1; Actin, cytoplasmic 2	ACTB-pY198; ACTG1-pY198	-0.00921401	0.0359674	-0.0274952	-0.0244083	0.14736	0.182128	0.656642	0.862419	0.81763
dSyVGDEAQSk	N-Term(TMT6plex); Y3(Phospho); K11(TMT6plex)	ACTG2; ACTB; ACTA2; ACTA1; ACTC1; ACTG1	Actin, gamma-enteric smooth muscle; Actin, cytoplasmic 1; Actin, aortic smooth muscle; Actin, alpha skeletal muscle; Actin, alpha cardiac muscle 1; Actin, cytoplasmic 2	ACTG2-pY54; ACTB-pY53; ACTA2-pY55; ACTA1-pY55; ACTC1-pY55; ACTG1-pY53	0.0356362	-0.0786381	0.0398966	0.669373	0.278844	0.363292	0.833524	0.0612311	0.274471
fAVPtYAAk	N-Term(TMT6plex); T5(Phospho); K9(TMT6plex)	ADAM9	Disintegrin and metalloproteinase domain-containing protein 9	ADAM9-pT777	-0.00507941	0.0487674	-0.0452323	-0.0262858	-0.00542078	0.0188221	0.0200662	0.187582	0.0896091
eVPIyANR	N-Term(TMT6plex); Y5(Phospho)	ADAM9	Disintegrin and metalloproteinase domain-containing protein 9	ADAM9-pY769	0.0295861	0.0275199	-0.0588602	-0.112181	0.0213103	-0.00484088	0.0478237	0.0135438	0.10768
sSSTTyFk	N-Term(TMT6plex); Y6(Phospho); K8(TMT6plex)	ADGRG6	Adhesion G-protein coupled receptor G6	ADGRG6-pY1184	-0.123588	0.192894	-0.0907358	-0.255208	0.00754019	-0.00149709	0.0745779	-0.377355	-0.0813714
sLSSSSIGSNSTyLTSk	N-Term(TMT6plex); Y13(Phospho); K17(TMT6plex)	ADGRG6	Adhesion G-protein coupled receptor G6	ADGRG6-pY1172	-0.144002	0.10789	0.0248073	0.0287832	0.145261	0.240361	0.059602	-0.100907	0.107473
sSSSDEEYIymNk	N-Term(TMT6plex); Y10(Phospho); M11(Oxidation); K13(TMT6plex)	AFAP1L2	Actin filament-associated protein 1-like 2	AFAP1L2-pY56	-0.481881	-0.0242163	0.37918	-0.174592	-0.321955	-0.0893324	0.0215366	0.094926	0.340181
vAQQPLSLVGcEVVPDPSPDHLySFR	N-Term(TMT6plex); C11(Carbamidomethyl); Y23(Phospho)	AFAP1L2	Actin filament-associated protein 1-like 2	AFAP1L2-pY413	-0.020431	-0.152155	0.155952	0.182238	-0.145717	0.331463	0.154422	0.19574	0.279727
vAQQPLSLVGcEVVPDPSPDHLYsFR	N-Term(TMT6plex); C11(Carbamidomethyl); S24(Phospho)	AFAP1L2	Actin filament-associated protein 1-like 2	AFAP1L2-pS414	0.176969	-0.288595	0.0714805	-0.0549451	-0.0203515	0.227332	0.224428	0.131879	0.327703
gHYEVTGsDDETGk	N-Term(TMT6plex); S8(Phospho); K14(TMT6plex)	AHNAK	Neuroblast differentiation-associated protein AHNAK	AHNAK-pS5841	-0.0939733	0.163041	-0.0840328	-0.389895	0.0308117	0.108771	0.431858	-0.140483	0.0698976
hIDcAyVYQNEHEVGEAIQEk	N-Term(TMT6plex); C4(Carbamidomethyl); Y6(Phospho); K21(TMT6plex)	AKR1B10	Aldo-keto reductase family 1 member B10	AKR1B10-pY47	0.165189	-0.0184849	-0.165825	0.288579	0.151181	0.252629	0.451364	0.684308	0.558341
yLYEIAR	N-Term(TMT6plex); Y1(Phospho)	ALB	Albumin	ALB-pY162	0.0962689	-0.0303913	-0.0712089	0.4791	0.26021	0.362905	0.182022	0.278509	0.383468
yLyEIAR	N-Term(TMT6plex); Y3(Phospho)	ALB	Albumin	ALB-pY164	0.0398857	-0.102833	0.0576448	0.244476	0.293167	0.392016	0.0690006	0.228937	0.152801
aNNTFyGLSAGVFTk	N-Term(TMT6plex); Y6(Phospho); K15(TMT6plex)	ALDH1A1	Retinal dehydrogenase 1	ALDH1A1-pY426	0.0797464	0.0395687	-0.127587	0.307453	-0.193397	0.323275	0.295492	0.421049	0.0263107
tIPIDGNFFTYtR	N-Term(TMT6plex); T12(Phospho)	ALDH1A1	Retinal dehydrogenase 1	ALDH1A1-pT155	0.380466	-0.0891703	-0.399398	-0.12885	-0.302486	0.195356	0.0840841	-0.570595	0.452375
eLGEyGFHEYTEVk	N-Term(TMT6plex); Y5(Phospho); K14(TMT6plex)	ALDH1A1	Retinal dehydrogenase 1	ALDH1A1-pY481	-0.0718445	0.0314663	0.0377741	-0.13754	-0.118214	-0.0185976	-0.0805466	0.0747349	0.183369
eLGEYGFHEyTEVk	N-Term(TMT6plex); Y10(Phospho); K14(TMT6plex)	ALDH1A1	Retinal dehydrogenase 1	ALDH1A1-pY486	0.0295795	0.0561413	-0.089875	-0.0818697	-0.0366197	-0.002286	0.1102	0.152902	0.155912
pyQYPALTPEQk	N-Term(TMT6plex); Y2(Phospho); K12(TMT6plex)	ALDOA	Fructose-bisphosphate aldolase A	ALDOA-pY3	-0.0638472	0.0142016	0.0473962	0.120805	0.152526	0.330672	0.789926	0.612967	0.683112
eEDEHPyELLLTAETk	N-Term(TMT6plex); Y7(Phospho); K16(TMT6plex)	ANKS1A	Ankyrin repeat and SAM domain-containing protein 1A	ANKS1A-pY455	0.0503957	0.00926832	-0.0618932	0.284166	0.204092	0.340969	0.392956	0.446154	0.465953
mPEQEyEFPEPR	N-Term(TMT6plex); M1(Oxidation); Y6(Phospho)	ANTXR1	Anthrax toxin receptor 1	ANTXR1-pY425	0.0353991	-0.0245142	-0.0115762	-0.0889385	0.178896	-0.0892707	0.0829784	-0.208658	0.0565895
vkmPEQEyEFPEPR	N-Term(TMT6plex); K2(TMT6plex); M3(Oxidation); Y8(Phospho)	ANTXR1	Anthrax toxin receptor 1	ANTXR1-pY425	0.173902	-0.0377618	-0.155647	0.645422	0.537012	0.363503	-0.241048	-0.22145	0.215986
wPTVDASYyGGR	N-Term(TMT6plex); Y9(Phospho)	ANTXR2; ANTXR1	Anthrax toxin receptor 2; Anthrax toxin receptor 1	ANTXR2-pY381; ANTXR1-pY383	-0.106477	0.0706816	0.0298895	-0.0210229	-0.0552813	0.135962	-0.0776757	0.123035	0.0741646
wPTVDASyYGGR	N-Term(TMT6plex); Y8(Phospho)	ANTXR2; ANTXR1	Anthrax toxin receptor 2; Anthrax toxin receptor 1	ANTXR2-pY380; ANTXR1-pY382	-0.0742154	0.0323648	0.0390743	-0.0438797	0.0471273	0.011575	0.0429997	0.187008	0.0736333
aLyEAGER	N-Term(TMT6plex); Y3(Phospho)	ANXA1	Annexin A1	ANXA1-pY207	0.0551628	0.0925994	-0.160469	0.290775	0.113551	0.170082	0.144527	-0.363734	-0.393151
rAEDGSVIDyELIDQDAR	N-Term(TMT6plex); Y10(Phospho)	ANXA2	Annexin A2	ANXA2-pY188	0.289793	0.109088	-0.516659	0.457243	-0.41721	0.140829	0.439728	1.3257	1.39091
sYSPyDmLESIR	N-Term(TMT6plex); Y5(Phospho); M7(Oxidation)	ANXA2P2; ANXA2	Putative annexin A2-like protein; Annexin A2	ANXA2P2-pY238; ANXA2-pY238	0.0805606	0.0284222	-0.116105	0.111127	0.018603	0.0902024	0.230222	0.158357	0.0875962
ayTNFDAER	N-Term(TMT6plex); Y2(Phospho)	ANXA2P2; ANXA2	Putative annexin A2-like protein; Annexin A2	ANXA2P2-pY30; ANXA2-pY30	-0.0189185	0.0252029	-0.00664469	0.447037	0.47983	0.422476	0.859038	0.87182	0.954647
lSLEGDHSTPPSAyGSVk	N-Term(TMT6plex); Y14(Phospho); K18(TMT6plex)	ANXA2P2; ANXA2	Putative annexin A2-like protein; Annexin A2	ANXA2P2-pY24; ANXA2-pY24	-0.119777	-0.107595	0.20356	0.235388	0.419171	0.589607	0.513817	0.827642	0.941318
hGYENPTyR	N-Term(TMT6plex); Y8(Phospho)	APLP1	Amyloid-like protein 1	APLP1-pY643	0.106269	0.0427598	-0.162499	0.81094	0.882623	1.28541	0.523016	0.0852193	0.542386
mQNHGYENPTyk	N-Term(TMT6plex); M1(Oxidation); Y11(Phospho); K12(TMT6plex)	APLP2	Amyloid-like protein 2	APLP2-pY755	-0.0287561	0.131343	-0.113376	0.111247	0.112952	0.0195617	0.149257	-0.15481	-0.158731
yLEQmQI	N-Term(TMT6plex); Y1(Phospho); M5(Oxidation)	APLP2	Amyloid-like protein 2	APLP2-pY757	0.00957978	-0.0310913	0.0209935	-0.216898	-0.288841	-0.152788	-0.179179	0.110203	-0.0302807
mQQNGYENPTyk	N-Term(TMT6plex); M1(Oxidation); Y11(Phospho); K12(TMT6plex)	APP	Amyloid-beta precursor protein	APP-pY762	-0.0394365	0.113995	-0.0820039	-0.00454083	-0.249184	-0.0111709	0.242591	0.0961367	0.291864
mQQNGyENPTYk	N-Term(TMT6plex); M1(Oxidation); Y6(Phospho); K12(TMT6plex)	APP	Amyloid-beta precursor protein	APP-pY757	-0.0962166	0.0995512	-0.0100228	-0.139154	-0.0631099	-0.304809	-0.0879038	-0.478716	-0.281751
mQQNGYENPtYk	N-Term(TMT6plex); M1(Oxidation); T10(Phospho); K12(TMT6plex)	APP	Amyloid-beta precursor protein	APP-pT761	-0.0838318	0.130361	-0.0560644	-0.295572	-0.109038	-0.341971	-0.0808698	-0.00111971	0.166725
lFPEFDDSDyDEVPEEGPGAPAR	N-Term(TMT6plex); Y10(Phospho)	ARAP1	Arf-GAP with Rho-GAP domain, ANK repeat and PH domain-containing protein 1	ARAP1-pY231	0.27447	0.102152	-0.4798	2.28591	2.30686	2.39618	2.65073	2.34648	2.71089
nEEENIySVPHDSTQGk	N-Term(TMT6plex); Y7(Phospho); K17(TMT6plex)	ARHGAP35	Rho GTPase-activating protein 35	ARHGAP35-pY1105	-0.00362302	-0.0221809	0.0254047	0.086299	0.0761227	0.0138793	0.0577779	0.1858	0.245849
nEEENIYsVPHDSTQGk	N-Term(TMT6plex); S8(Phospho); K17(TMT6plex)	ARHGAP35	Rho GTPase-activating protein 35	ARHGAP35-pS1106	0.0369543	-0.0520221	0.0135993	-0.0765407	0.0474995	-0.00549451	0.15591	0.13885	0.202392
dySTVSASPTALSTLk	N-Term(TMT6plex); Y2(Phospho); K16(TMT6plex)	ARHGEF5	Rho guanine nucleotide exchange factor 5	ARHGEF5-pY656	0.0952008	-0.119782	0.0164385	3.42118	3.50154	3.5546	4.01865	3.96904	4.01362
yFDSGDyNmAk	N-Term(TMT6plex); Y7(Phospho); M9(Oxidation); K11(TMT6plex)	ARPP19; ENSA	cAMP-regulated phosphoprotein 19; Alpha-endosulfine	ARPP19-pY65; ENSA-pY70	-0.165829	-0.0461591	0.189126	2.76415	2.71189	2.65304	3.36621	3.28616	3.30512
yFDSGDYNmAk	N-Term(TMT6plex); Y1(Phospho); M9(Oxidation); K11(TMT6plex)	ARPP19; ENSA	cAMP-regulated phosphoprotein 19; Alpha-endosulfine	ARPP19-pY59; ENSA-pY64	0.192731	-0.149945	-0.0652341	2.89741	2.82564	2.7627	3.40031	3.22579	3.25937
gmkDDDyDDQLc	N-Term(TMT6plex); M2(Oxidation); K3(TMT6plex); Y7(Phospho); C12(Carbamidomethyl)	ARRB2	Beta-arrestin-2	ARRB2-pY404	-0.171486	0.189703	-0.0416494	1.11555	0.829499	1.6491	1.95764	1.79632	2.03721
gIVVyTGDR	N-Term(TMT6plex); Y5(Phospho)	ATP1A1	Sodium/potassium-transporting ATPase subunit alpha-1	ATP1A1-pY260	-0.0145334	0.0284398	-0.0143325	0.295391	0.356931	0.295707	0.505184	0.625399	0.620839
yGTDLSR	N-Term(TMT6plex); Y1(Phospho)	ATP1A1	Sodium/potassium-transporting ATPase subunit alpha-1	ATP1A1-pY55	0.053678	0.170382	-0.257156	0.627305	0.280217	0.22673	0.127165	-0.110594	-0.0953732
yGEVFEPTVER	N-Term(TMT6plex); Y1(Phospho)	AXL	Tyrosine-protein kinase receptor UFO	AXL-pY481	0.0625864	-0.333219	0.216486	0.247179	0.208316	0.341678	0.24003	0.249447	0.658711
yVLcPSTTPSPAQPADR	N-Term(TMT6plex); Y1(Phospho); C4(Carbamidomethyl)	AXL	Tyrosine-protein kinase receptor UFO	AXL-pY866	0.267349	-0.0467772	-0.271759	0.546169	0.53663	0.440497	0.550765	0.284824	0.322684
gQTPYPGVENSEIyDYLR	N-Term(TMT6plex); Y14(Phospho)	AXL	Tyrosine-protein kinase receptor UFO	AXL-pY759	-0.0460896	0.201901	-0.182412	0.421295	0.291425	0.506316	0.490377	0.202664	0.226951
dGWLyGEHDVSk	N-Term(TMT6plex); Y5(Phospho); K12(TMT6plex)	BAIAP2L1	Brain-specific angiogenesis inhibitor 1-associated protein 2-like protein 1	BAIAP2L1-pY380	0.105476	0.110136	-0.243282	-0.177255	-0.0932689	-0.135238	-0.120554	0.0877861	0.221457
eETyDVPPAFAk	N-Term(TMT6plex); Y4(Phospho); K12(TMT6plex)	BCAR1	Breast cancer anti-estrogen resistance protein 1	BCAR1-pY327	0.0511844	-0.0165618	-0.0360836	-0.0510111	-0.0464132	-0.125429	-0.263157	-0.392132	-0.200019
aQQGLyQVPGPSPQFQSPPAk	N-Term(TMT6plex); Y6(Phospho); K21(TMT6plex)	BCAR1	Breast cancer anti-estrogen resistance protein 1	BCAR1-pY128	-0.392309	0.159387	0.165144	-0.0274267	-0.326374	0.402162	-0.182625	0.190524	-0.501768
rPGPGTLyDVPR	N-Term(TMT6plex); Y8(Phospho)	BCAR1	Breast cancer anti-estrogen resistance protein 1	BCAR1-pY387	0.0118577	0.0512248	-0.065517	-0.0523066	-0.169974	-0.0417476	-0.905884	-0.638505	-0.305546
dPHLLDPTVEyVk	N-Term(TMT6plex); Y11(Phospho); K13(TMT6plex)	BCAR3	Breast cancer anti-estrogen resistance protein 3	BCAR3-pY117	0.0822682	0.00345948	-0.0909289	-0.404892	-0.329449	-0.356917	-0.271386	-0.436421	-0.383097
cLEEHyGTSPGQAR	N-Term(TMT6plex); C1(Carbamidomethyl); Y6(Phospho)	BCAR3	Breast cancer anti-estrogen resistance protein 3	BCAR3-pY266	-0.00743937	0.00331572	0.00409488	0.367571	0.178558	0.184422	-0.10434	-0.314812	-0.25864
vPSSPSAWLNSEANycELNPAFATGcGR	N-Term(TMT6plex); Y15(Phospho); C16(Carbamidomethyl); C26(Carbamidomethyl)	BCAR3	Breast cancer anti-estrogen resistance protein 3	BCAR3-pY429	-0.323299	0.0364733	0.232852	0.105042	0.664345	0.415874	0.595629	0.506844	1.28852
rIEyIEAR	N-Term(TMT6plex); Y4(Phospho)	BRK1	Protein BRICK1	BRK1-pY63	0.256709	0.0895056	-0.431978	0.225286	0.132831	0.358288	0.259135	0.698535	0.37885
lEQyTSAIEGTk	N-Term(TMT6plex); Y4(Phospho); K12(TMT6plex)	CALD1	Caldesmon	CALD1-pY682	0.22525	0.045421	-0.323667	1.05455	0.944249	0.871544	1.16317	1.60462	1.5372
qVAYIyk	N-Term(TMT6plex); Y6(Phospho); K7(TMT6plex)	CAP1	Adenylyl cyclase-associated protein 1	CAP1-pY354	-0.215738	0.120411	0.0729289	0.391715	0.374854	0.337185	-0.206778	0.262236	0.327269
nTyNQTALDIVNQFTTSQASR	N-Term(TMT6plex); Y3(Phospho)	CASKIN2	Caskin-2	CASKIN2-pY253	0.0135899	-0.200943	0.164212	0.121745	0.16767	-0.0398829	-0.0552445	0.141167	0.307718
yVDSEGHLyTVPIR	N-Term(TMT6plex); Y9(Phospho)	CAV1	Caveolin-1	CAV1-pY14	-0.149517	0.287955	-0.188464	0.246376	0.579558	0.536016	0.132899	0.320559	0.494107
yVDSEGHLYTVPIR	N-Term(TMT6plex); Y1(Phospho)	CAV1	Caveolin-1	CAV1-pY6	0.064058	0.0358939	-0.105619	0.435649	0.44615	0.214724	0.407571	0.451908	0.112688
sFTPDHVVyAR	N-Term(TMT6plex); Y9(Phospho)	CAVIN1	Caveolae-associated protein 1	CAVIN1-pY308	0.0271472	-0.0429701	0.0148555	0.246551	0.281305	0.281604	0.359802	0.48494	0.490175
vmIyQDEVk	N-Term(TMT6plex); M2(Oxidation); Y4(Phospho); K9(TMT6plex)	CAVIN1	Caveolae-associated protein 1	CAVIN1-pY156	0.109167	0.0377904	-0.160276	0.250377	0.414179	0.358573	0.329701	0.193382	0.351512
aYADSYyYEDGGmkPR	N-Term(TMT6plex); Y7(Phospho); M13(Oxidation); K14(TMT6plex)	CCDC50	Coiled-coil domain-containing protein 50	CCDC50-pY145	-0.141151	0.213375	-0.0988035	2.75124	2.61964	2.92987	5.30736	5.21716	5.1746
qPEYSPEsPR	N-Term(TMT6plex); S8(Phospho)	CCDC86	Coiled-coil domain-containing protein 86	CCDC86-pS113	0.0294979	0.0341628	-0.0658524	0.55564	-0.0129598	0.403351	0.261734	0.30042	0.424475
dSNPyATLPR	N-Term(TMT6plex); Y5(Phospho)	CCDC88A	Girdin	CCDC88A-pY1799	0.0311901	0.0932777	-0.133916	0.127291	0.205209	-0.065985	-0.0875745	-0.119698	-0.0232202
iGEGTYGVVyk	N-Term(TMT6plex); Y10(Phospho); K11(TMT6plex)	CDK2; CDK1; CDK3	Cyclin-dependent kinase 2; Cyclin-dependent kinase 1; Cyclin-dependent kinase 3	CDK2-pY19; CDK1-pY19; CDK3-pY19	-0.0197282	0.0472536	-0.0287262	-0.0532878	0.0128184	0.0127411	-0.0119798	0.112509	0.179717
iGEGTyGVVYk	N-Term(TMT6plex); Y6(Phospho); K11(TMT6plex)	CDK2; CDK1; CDK3	Cyclin-dependent kinase 2; Cyclin-dependent kinase 1; Cyclin-dependent kinase 3	CDK2-pY15; CDK1-pY15; CDK3-pY15	0.0110041	0.00731627	-0.0184991	-0.119073	-0.0405038	-0.119497	0.0168805	0.025389	0.0203822
iGEGtyGVVYk	N-Term(TMT6plex); T5(Phospho); Y6(Phospho); K11(TMT6plex)	CDK2; CDK1; CDK3	Cyclin-dependent kinase 2; Cyclin-dependent kinase 1; Cyclin-dependent kinase 3	CDK2-pT14-pY15; CDK1-pT14-pY15; CDK3-pT14-pY15	0.00752751	0.0564143	-0.0665925	0.896217	1.1991	1.11302	1.62232	1.23597	1.24272
iGEGTyGTVFk	N-Term(TMT6plex); Y6(Phospho); K11(TMT6plex)	CDK5	Cyclin-dependent-like kinase 5	CDK5-pY15	-0.344673	0.226262	0.0603436	0.0224192	-0.0324665	-0.0672942	0.39933	0.486479	0.412659
nLSEGNNANYTEyVATR	N-Term(TMT6plex); Y13(Phospho)	CDKL5	Cyclin-dependent kinase-like 5	CDKL5-pY171	-0.0777592	0.00171102	0.072154	0.342675	0.281682	0.337321	0.100422	0.335603	0.291661
lQLDNQyAVLENQk	N-Term(TMT6plex); Y7(Phospho); K14(TMT6plex)	CDV3	Protein CDV3 homolog	CDV3-pY244	-0.338516	-0.110907	0.359679	1.4388	1.52005	1.03177	1.87523	2.06271	2.0332
hELQANcyEEVk	N-Term(TMT6plex); C7(Carbamidomethyl); Y8(Phospho); K12(TMT6plex)	CFL1	Cofilin-1	CFL1-pY140	0.25796	0.0773716	-0.416733	-0.105442	0.0467731	-0.361577	0.0386758	-0.422796	-0.28323
hELQANcyEEVkDR	N-Term(TMT6plex); C7(Carbamidomethyl); Y8(Phospho); K12(TMT6plex)	CFL1	Cofilin-1	CFL1-pY140	0.182632	-0.485775	0.202805	0.556114	0.181814	-0.399662	-0.130186	0.200089	0.111088
ayEFAER	N-Term(TMT6plex); Y2(Phospho)	CLTC; CLTCL1	Clathrin heavy chain 1; Clathrin heavy chain 2	CLTC-pY1096; CLTCL1-pY1096	0.0326953	0.01874	-0.0528885	-0.0321705	-0.0315362	0.0129638	-0.0271908	-0.11273	-0.0115189
sPSEVVyLR	N-Term(TMT6plex); Y7(Phospho)	CNNM1	Metal transporter CNNM1	CNNM1-pY856	-0.048772	0.0967681	-0.0530956	-0.103903	-0.0978758	-0.213505	0.310343	0.0926679	0.291561
qHHDEyEDEIR	N-Term(TMT6plex); Y6(Phospho)	CPD	Carboxypeptidase D	CPD-pY1344	0.113211	-0.0567749	-0.0634749	-0.0400623	-0.0878019	-0.322539	-0.047035	-0.240224	-0.0303844
fSGFySmQk	N-Term(TMT6plex); Y5(Phospho); M7(Oxidation); K9(TMT6plex)	CRIM1	Cysteine-rich motor neuron 1 protein	CRIM1-pY1019	0.0810711	0.041547	-0.131345	-0.0641473	-0.0401577	-0.010183	0.0024296	0.0255321	0.0831808
qNHLQADNFYQtV	N-Term(TMT6plex); T12(Phospho)	CRIM1	Cysteine-rich motor neuron 1 protein	CRIM1-pT1035	0.223379	-0.169739	-0.0838572	0.545913	0.710026	0.592266	0.446594	0.499098	0.710527
qNHLQADNFyQTV	N-Term(TMT6plex); Y10(Phospho)	CRIM1	Cysteine-rich motor neuron 1 protein	CRIM1-pY1033	0.019221	-0.00329221	-0.0161513	-0.0941656	-0.0257168	-0.0176626	-0.0436433	-0.0229636	0.0417664
eVyFAER	N-Term(TMT6plex); Y3(Phospho)	CRIP1	Cysteine-rich protein 1	CRIP1-pY12	0.0995785	-0.0534174	-0.0515656	-0.0331548	0.195641	0.0922918	0.529398	0.623502	0.787614
rVPNAyDk	N-Term(TMT6plex); Y6(Phospho); K8(TMT6plex)	CRK	Adapter molecule crk	CRK-pY251	-0.146448	0.178587	-0.0517685	0.663018	0.0707727	0.427612	0.898232	0.00314389	0.0633186
qEEAEyVR	N-Term(TMT6plex); Y6(Phospho)	CRK	Adapter molecule crk	CRK-pY136	-0.0733107	0.0832001	-0.0142368	1.78333	1.41241	1.37122	2.88525	1.94694	2.15576
lVyDGIR	N-Term(TMT6plex); Y3(Phospho)	CTNNA1	Catenin alpha-1	CTNNA1-pY619	0.0295312	-0.00709738	-0.0229369	0.133089	0.173585	0.0637248	-0.124315	0.115038	0.10176
sLDNNySTPNER	N-Term(TMT6plex); Y6(Phospho)	CTNND1	Catenin delta-1	CTNND1-pY904	-0.0857962	0.10773	-0.028846	1.84422	1.73457	1.44045	1.98544	1.6522	1.84108
vDQSAVGFEyQGk	N-Term(TMT6plex); Y10(Phospho); K13(TMT6plex)	CTTN	Src substrate cortactin	CTTN-pY141	-0.0159794	-0.584229	0.426543	2.00564	1.79134	1.92471	2.58654	2.44588	2.45934
nASTFEDVTQVSSAyQk	N-Term(TMT6plex); Y15(Phospho); K17(TMT6plex)	CTTN	Src substrate cortactin	CTTN-pY334	-0.162205	0.0415404	0.107192	1.03631	1.12934	1.1018	1.59293	1.50829	1.68929
lPSSPVyEDAASFk	N-Term(TMT6plex); Y7(Phospho); K14(TMT6plex)	CTTN	Src substrate cortactin	CTTN-pY421	-0.100023	0.0531874	0.0418421	0.716084	0.84061	0.8407	0.640628	0.547232	0.75885
dySSGFGGk	N-Term(TMT6plex); Y2(Phospho); K9(TMT6plex)	CTTN	Src substrate cortactin	CTTN-pY154	0.0921674	-0.106801	0.00774717	2.16975	2.07528	2.0199	2.39016	1.63646	1.96618
gQFDyALV	N-Term(TMT6plex); Y5(Phospho)	CTXN1	Cortexin-1	CTXN1-pY79	0.0535098	-0.341471	0.230175	0.401897	0.11732	-0.0212807	0.622473	0.541757	0.111589
tTVyVVEDQR	N-Term(TMT6plex); Y4(Phospho)	CYSTM1	Cysteine-rich and transmembrane domain-containing protein 1	CYSTM1-pY64	0.00865935	0.105917	-0.123746	-0.307465	-0.219421	-0.104415	-0.0266208	-0.042664	0.213637
kTEGTyDLPYWDR	N-Term(TMT6plex); K1(TMT6plex); Y6(Phospho)	DCBLD2	Discoidin, CUB and LCCL domain-containing protein 2	DCBLD2-pY565	-0.0612621	0.00293556	0.0559423	-0.0623073	-0.186606	-0.157243	0.0700118	-0.0102198	0.00930099
tDScSSAQAQyDTPk	N-Term(TMT6plex); C4(Carbamidomethyl); Y11(Phospho); K15(TMT6plex)	DCBLD2	Discoidin, CUB and LCCL domain-containing protein 2	DCBLD2-pY732	-0.0965748	0.0571325	0.0347136	0.587233	-0.0465173	-0.00372443	-0.0785965	-1.00548	-0.915628
tEGTyDLPYWDR	N-Term(TMT6plex); Y5(Phospho)	DCBLD2	Discoidin, CUB and LCCL domain-containing protein 2	DCBLD2-pY565	0.0616434	0.031821	-0.0984369	-0.0626139	0.113403	-0.167604	-0.0369401	0.0887529	-0.0824191
ySSSEVNHLSPR	N-Term(TMT6plex); Y1(Phospho)	DCBLD2	Discoidin, CUB and LCCL domain-containing protein 2	DCBLD2-pY597	-0.0517426	0.00449669	0.0455939	-0.183368	0.0629078	-0.0663708	-0.254354	0.307735	-0.316976
yLDPEyIDR	N-Term(TMT6plex); Y6(Phospho)	DCTN3	Dynactin subunit 3	DCTN3-pY72	-0.226492	0.0791093	0.122903	-0.261861	-0.0406742	-0.0699085	0.0713017	0.0987811	0.193874
sTcIyGGAPk	N-Term(TMT6plex); C3(Carbamidomethyl); Y5(Phospho); K10(TMT6plex)	DDX17; DDX5	Probable ATP-dependent RNA helicase DDX17; Probable ATP-dependent RNA helicase DDX5	DDX17-pY279; DDX5-pY202	0.0317613	0.0350767	-0.0692561	-0.0162493	-0.0120188	-0.168956	-0.0866428	-0.00638571	-0.172781
sDyDGIGSR	N-Term(TMT6plex); Y3(Phospho)	DDX3X	ATP-dependent RNA helicase DDX3X	DDX3X-pY104	0.0164435	0.0281695	-0.0457002	1.22398	1.10219	1.01433	2.1671	1.40039	1.69023
gRSDyDGIGSR	N-Term(TMT6plex); Y5(Phospho)	DDX3X	ATP-dependent RNA helicase DDX3X	DDX3X-pY104	0.0383396	0.101669	-0.151916	1.33942	1.474	1.45752	1.84514	1.57701	1.52994
sLYVAEyHSEPVEDEkP	N-Term(TMT6plex); Y7(Phospho); K16(TMT6plex)	DDX6	Probable ATP-dependent RNA helicase DDX6	DDX6-pY473	0.168752	0.198701	-0.457494	0.396553	1.02952	0.877347	2.21559	2.26031	2.34944
eNPyEDVDLk	N-Term(TMT6plex); Y4(Phospho); K10(TMT6plex)	DENND2B	DENN domain-containing protein 2B	DENND2B-pY501	0.0685331	-0.0172616	-0.0540274	-0.0686709	-0.0307161	0.0108596	-0.11958	-0.164886	-0.101485
gSVADyGNLmENQDLLGSPTPPPPPPHQR	N-Term(TMT6plex); Y6(Phospho); M10(Oxidation)	DOCK1	Dedicator of cytokinesis protein 1	DOCK1-pY1811	-0.484299	0.221423	0.162561	0.440652	0.886092	0.458779	-0.09677	0.651205	0.387613
tPPPYSVyER	N-Term(TMT6plex); Y8(Phospho)	DOCK4	Dedicator of cytokinesis protein 4	DOCK4-pY1906	-0.0616233	-0.0538577	0.10897	1.16619	1.32112	1.20404	1.47308	1.30467	1.28933
dSYyVYTQQELk	N-Term(TMT6plex); Y4(Phospho); K12(TMT6plex)	DOCK5	Dedicator of cytokinesis protein 5	DOCK5-pY1289	0.0507386	0.0615842	-0.119363	0.779746	0.449789	0.502801	1.22153	1.46681	1.41633
vyAPASTLVDQPYANEGTVVVTER	N-Term(TMT6plex); Y2(Phospho)	DSG2	Desmoglein-2	DSG2-pY968	-0.0766125	0.00899308	0.0641452	-0.0534598	0.0831993	0.113224	0.10507	0.0042854	0.0952404
vLAPASTLQSSyQIPTENSmTAR	N-Term(TMT6plex); Y12(Phospho); M20(Oxidation)	DSG2	Desmoglein-2	DSG2-pY1061	0.28399	-0.661093	0.201688	-0.909748	-0.749107	0.15494	0.886516	0.16417	0.0990669
nFGSyVTHETk	N-Term(TMT6plex); Y5(Phospho); K11(TMT6plex)	DYNLL2; DYNLL1	Dynein light chain 2, cytoplasmic; Dynein light chain 1, cytoplasmic	DYNLL2-pY65; DYNLL1-pY65	-0.143631	-0.00120572	0.131718	-0.234968	-0.106626	-0.114195	-0.0389664	0.0125601	0.255248
kVYNDGYDDDNyDYIVk	N-Term(TMT6plex); K1(TMT6plex); Y12(Phospho); K17(TMT6plex)	DYRK1A	Dual specificity tyrosine-phosphorylation-regulated kinase 1A	DYRK1A-pY145	-0.212077	-0.0148029	0.197758	-0.20362	-0.00136437	-0.128078	-0.0621761	-0.0564538	0.0869952
vYNDGYDDDNyDYIVk	N-Term(TMT6plex); Y11(Phospho); K16(TMT6plex)	DYRK1A	Dual specificity tyrosine-phosphorylation-regulated kinase 1A	DYRK1A-pY145	-0.271637	0.392915	-0.21998	0.522994	0.931437	0.114791	0.428367	0.132864	0.236321
vYTyIQSR	N-Term(TMT6plex); Y4(Phospho)	DYRK2; DYRK4	Dual specificity tyrosine-phosphorylation-regulated kinase 2; Dual specificity tyrosine-phosphorylation-regulated kinase 4	DYRK2-pY382; DYRK4-pY264	0.0117278	-0.0234363	0.011426	-0.131224	-0.0579202	-0.0660119	-0.19699	-0.0304445	-0.0188685
eVSTyIk	N-Term(TMT6plex); Y5(Phospho); K7(TMT6plex)	EEF1A1; EEF1A1P5	Elongation factor 1-alpha 1; Putative elongation factor 1-alpha-like 3	EEF1A1-pY177; EEF1A1P5-pY177	0.0475929	-0.011245	-0.037673	-0.161678	-0.0160278	-0.157272	-0.0669696	0.208134	0.138254
sTTTGHLIyk	N-Term(TMT6plex); Y9(Phospho); K10(TMT6plex)	EEF1A2; EEF1A1; EEF1A1P5	Elongation factor 1-alpha 2; Elongation factor 1-alpha 1; Putative elongation factor 1-alpha-like 3	EEF1A2-pY29; EEF1A1-pY29; EEF1A1P5-pY29	-0.049921	-0.0493692	0.0944415	-0.116382	-0.135518	-0.0410962	0.0581199	0.112315	0.0477235
eHALLAyTLGVk	N-Term(TMT6plex); Y7(Phospho); K12(TMT6plex)	EEF1A2; EEF1A1; EEF1A1P5	Elongation factor 1-alpha 2; Elongation factor 1-alpha 1; Putative elongation factor 1-alpha-like 3	EEF1A2-pY141; EEF1A1-pY141; EEF1A1P5-pY141	-0.128561	0.128676	-0.0116361	-0.261978	-0.198319	-0.231809	-0.198622	-0.0075618	0.00710955
tTENNYcPHyEk	N-Term(TMT6plex); C7(Carbamidomethyl); Y10(Phospho); K12(TMT6plex)	EFNB1	Ephrin-B1	EFNB1-pY317	-0.118854	0.222393	-0.13224	-0.473236	0.044537	-0.0837772	-0.370463	-0.398848	-0.000872811
gSTAENAEyLR	N-Term(TMT6plex); Y9(Phospho)	EGFR	Epidermal growth factor receptor	EGFR-pY1197	-0.434946	0.138787	0.213253	4.37171	4.37032	4.38625	4.55057	4.52491	4.52801
gyDVIAQAQSGTGk	N-Term(TMT6plex); Y2(Phospho); K14(TMT6plex)	EIF4A1; EIF4A2	Eukaryotic initiation factor 4A-I; Eukaryotic initiation factor 4A-II	EIF4A1-pY70; EIF4A2-pY71	-0.210999	0.0793922	0.110348	0.215697	0.602582	0.237837	0.556352	0.118599	0.326813
aRPATDSFDDyPPR	N-Term(TMT6plex); Y11(Phospho)	EIF4B	Eukaryotic translation initiation factor 4B	EIF4B-pY211	-0.0856021	0.137878	-0.0629214	1.49799	1.37259	1.70175	2.9716	2.95151	3.00273
aySSFGGGR	N-Term(TMT6plex); Y2(Phospho)	EIF4H	Eukaryotic translation initiation factor 4H	EIF4H-pY12	-0.215838	0.201723	-0.0161277	1.47238	1.35733	1.22947	1.22604	0.732938	0.7682
ePSSYDFVYHyG	N-Term(TMT6plex); Y11(Phospho)	ELMO2	Engulfment and cell motility protein 2	ELMO2-pY719	0.206771	-0.219648	-0.0186984	0.315101	0.611425	0.550956	0.372689	0.511891	0.270991
dVIINQEGEyIk	N-Term(TMT6plex); Y10(Phospho); K12(TMT6plex)	EML4	Echinoderm microtubule-associated protein-like 4	EML4-pY226	0.383831	-0.0305847	-0.481618	0.108404	-0.268468	0.153347	-0.0125687	-0.740379	0.30915
aAVPSGASTGIyEALELR	N-Term(TMT6plex); Y12(Phospho)	ENO3; ENO2; ENO1	Beta-enolase; Gamma-enolase; Alpha-enolase	ENO3-pY44; ENO2-pY44; ENO1-pY44	0.145592	-0.194954	0.0288725	-0.0048031	0.255347	0.123708	0.175522	0.315227	0.0488477
vEGDNIyVR	N-Term(TMT6plex); Y7(Phospho)	EPB41L2	Band 4.1-like protein 2	EPB41L2-pY623	0.0092272	0.00857882	-0.0179726	1.56846	1.5768	1.5784	1.63107	1.62457	1.67419
vLEDDPEAtYTTSGGk	N-Term(TMT6plex); T9(Phospho); K16(TMT6plex)	EPHA2	Ephrin type-A receptor 2	EPHA2-pT771	-0.0663588	0.0206975	0.0433512	0.0252036	0.272985	0.0307063	0.202233	0.0205851	0.312255
tyVDPHTyEDPNQAVLk	N-Term(TMT6plex); Y2(Phospho); Y8(Phospho); K17(TMT6plex)	EPHA2	Ephrin type-A receptor 2	EPHA2-pY588-pY594	-0.217667	0.097983	0.0972994	-0.401245	0.00525329	-0.254379	0.364965	-0.0784236	-0.0856735
vIGAGEFGEVyk	N-Term(TMT6plex); Y11(Phospho); K12(TMT6plex)	EPHA2	Ephrin type-A receptor 2	EPHA2-pY628	-0.0987582	0.0564922	0.0373533	-0.0649282	0.190812	0.147132	0.417948	0.35492	0.195814
tyVDPHTYEDPNQAVLk	N-Term(TMT6plex); Y2(Phospho); K17(TMT6plex)	EPHA2	Ephrin type-A receptor 2	EPHA2-pY588	0.0567684	0.00343878	-0.0626853	-0.347496	-0.141687	-0.0797042	0.0289949	0.0880894	0.129192
tYVDPHTyEDPNQAVLk	N-Term(TMT6plex); Y8(Phospho); K17(TMT6plex)	EPHA2	Ephrin type-A receptor 2	EPHA2-pY594	-0.0673478	0.0190775	0.0458591	-0.0372934	0.0668766	0.0474484	-0.0350369	0.0536353	0.0669303
qSPEDVyFSk	N-Term(TMT6plex); Y7(Phospho); K10(TMT6plex)	EPHA2	Ephrin type-A receptor 2	EPHA2-pY575	-0.0627084	0.10632	-0.0498212	-0.0686647	0.0928896	-0.0201835	-0.0382023	0.120441	0.0822511
vLEDDPEATyTTSGGk	N-Term(TMT6plex); Y10(Phospho); K16(TMT6plex)	EPHA2	Ephrin type-A receptor 2	EPHA2-pY772	0.0138601	0.0192431	-0.0336892	-0.12478	0.0248846	-0.127494	-0.0645391	0.0617626	0.0381348
vIEDDPEAVyTTTGGk	N-Term(TMT6plex); Y10(Phospho); K16(TMT6plex)	EPHA7	Ephrin type-A receptor 7	EPHA7-pY791	0.0187125	0.0195818	-0.0390742	-0.0876819	0.0964231	-0.15524	0.168365	0.12133	0.0680232
tYIDPEtYEDPNR	N-Term(TMT6plex); T7(Phospho)	EPHA7	Ephrin type-A receptor 7	EPHA7-pT613	-0.132372	-0.0787004	0.189995	0.133344	0.125362	-0.297265	-0.0128318	0.160752	0.0524004
tYIDPETyEDPNR	N-Term(TMT6plex); Y8(Phospho)	EPHA7	Ephrin type-A receptor 7	EPHA7-pY614	0.0807427	0.0627945	-0.155292	0.173361	0.475741	0.15679	-0.0972126	0.589961	0.0399259
fLEENSSDPtYTSSLGGk	N-Term(TMT6plex); T10(Phospho); K18(TMT6plex)	EPHB4	Ephrin type-B receptor 4	EPHB4-pT773	-0.41409	-0.0905088	0.389915	0.0928023	0.392062	0.159861	-0.160849	0.0190025	-0.0846423
fLEENSSDPTyTSSLGGk	N-Term(TMT6plex); Y11(Phospho); K18(TMT6plex)	EPHB4	Ephrin type-B receptor 4	EPHB4-pY774	-0.201629	-0.0171394	0.191868	-0.140644	0.235246	0.0055721	-0.254846	0.252774	0.216916
tmSVSDFNYsR	N-Term(TMT6plex); M2(Oxidation); S10(Phospho)	ERBIN	Erbin	ERBIN-pS1165	0.0674146	0.055232	-0.131097	2.46836	2.62033	2.39457	2.36385	2.40418	2.6698
aQIPEGDyLSYR	N-Term(TMT6plex); Y8(Phospho)	ERBIN	Erbin	ERBIN-pY1104	0.103482	-0.0943178	-0.0160724	1.35408	1.3761	1.41686	1.21386	1.23703	1.23968
rAQIPEGDyLSYR	N-Term(TMT6plex); Y9(Phospho)	ERBIN	Erbin	ERBIN-pY1104	-0.142846	0.135577	-0.00616328	0.944515	1.04883	1.01297	0.795465	0.753639	0.625888
vIySQPSAR	N-Term(TMT6plex); Y3(Phospho)	F11R	Junctional adhesion molecule A	F11R-pY280	0.000830208	0.233398	-0.279593	0.115354	0.337316	0.159645	-0.124109	-0.287138	0.0440766
eSSDPSSYNsSGQLmASk	N-Term(TMT6plex); S10(Phospho); M15(Oxidation); K18(TMT6plex)	F2R	Proteinase-activated receptor 1	F2R-pS399	-0.343874	0.00171307	0.276067	-0.397147	-0.117118	-0.267369	0.259884	-0.543235	-0.988358
eSSDPSSyNSSGQLmASk	N-Term(TMT6plex); Y8(Phospho); M15(Oxidation); K18(TMT6plex)	F2R	Proteinase-activated receptor 1	F2R-pY397	0.0712731	0.17751	-0.289075	-0.562369	0.384491	0.404383	0.45435	0.164885	0.0806138
sSSySSSSTTVk	N-Term(TMT6plex); Y4(Phospho); K12(TMT6plex)	F2RL1	Proteinase-activated receptor 2	F2RL1-pY386	-0.54675	0.0852616	0.327181	0.168348	-0.270127	-0.625018	-0.200515	-0.926679	-0.962774
vQENDGkEPPPVVNyEEDAR	N-Term(TMT6plex); K7(TMT6plex); Y15(Phospho)	FER	Tyrosine-protein kinase Fer	FER-pY402	0.141089	-0.116062	-0.0371764	-0.228629	0.0380679	0.00549674	-0.0415587	-0.0297646	-0.433947
kLDDQSEDEALELEGPLITPGSGSIySSPGLYSk	N-Term(TMT6plex); K1(TMT6plex); Y26(Phospho); K34(TMT6plex)	FERMT2	Fermitin family homolog 2	FERMT2-pY179	0.0243129	-0.205405	0.157961	-0.0193225	0.458452	0.180878	-0.168135	0.0916571	0.215202
sVTSLcAPEyENIR	N-Term(TMT6plex); C6(Carbamidomethyl); Y10(Phospho)	FGD6	FYVE, RhoGEF and PH domain-containing protein 6	FGD6-pY748	-0.0236694	-0.17363	0.175893	0.71661	0.666019	0.42701	0.308886	0.352836	0.908415
rPPGLEycYNPSHNPEEQLSSk	N-Term(TMT6plex); Y7(Phospho); C8(Carbamidomethyl); K22(TMT6plex)	FGFR1	Fibroblast growth factor receptor 1	FGFR1-pY583	-0.0805214	0.28485	-0.258425	0.228263	0.291642	0.165106	0.148822	0.473304	0.402208
sSTETcySAIPk	N-Term(TMT6plex); C6(Carbamidomethyl); Y7(Phospho); K12(TMT6plex)	FLNB	Filamin-B	FLNB-pY2502	-0.125352	-0.0838269	0.188614	0.719449	0.721489	0.775025	1.09279	1.15367	1.23917
lEDYFETDSsYSDANNFIR	N-Term(TMT6plex); S10(Phospho)	FRK	Tyrosine-protein kinase FRK	FRK-pS496	0.429806	-0.375395	-0.181062	0.0337057	0.0729076	0.272356	0.258433	0.494419	0.853831
lEDYFETDSSySDANNFIR	N-Term(TMT6plex); Y11(Phospho)	FRK	Tyrosine-protein kinase FRK	FRK-pY497	-0.0597661	-0.100945	0.148164	-0.0455356	-0.0550984	0.0425984	0.39458	0.243116	0.0745258
yQDEVFGGFVTEPQEEsEEEVEEPEER	N-Term(TMT6plex); S17(Phospho)	G3BP1	Ras GTPase-activating protein-binding protein 1	G3BP1-pS149	0.111415	-0.103004	-0.0165116	-0.261689	0.0870703	0.0549217	0.323011	0.278841	0.200158
iDHyLGk	N-Term(TMT6plex); Y4(Phospho); K7(TMT6plex)	G6PD	Glucose-6-phosphate 1-dehydrogenase	G6PD-pY202	0.00272339	0.104103	-0.115152	-0.200439	-0.275991	-0.224827	-0.0966071	-0.244991	-0.0315852
vQPNEAVYtk	N-Term(TMT6plex); T9(Phospho); K10(TMT6plex)	G6PD	Glucose-6-phosphate 1-dehydrogenase	G6PD-pT402	-0.0988165	0.15416	-0.0688047	-0.0938093	-0.124561	-0.198244	-0.0100432	-0.486922	-0.139534
vGFQyEGTYk	N-Term(TMT6plex); Y5(Phospho); K10(TMT6plex)	G6PD	Glucose-6-phosphate 1-dehydrogenase	G6PD-pY503	0.0114138	0.00146218	-0.0129802	-0.22073	-0.179176	-0.21415	-0.179698	-0.0844137	-0.044778
nSYVAGQyDDAASYQR	N-Term(TMT6plex); Y8(Phospho)	G6PD	Glucose-6-phosphate 1-dehydrogenase	G6PD-pY112	-0.0548253	0.104509	-0.0556509	-0.240027	0.0181464	0.0179373	-0.227319	-0.119994	0.170667
vQPNEAVyTk	N-Term(TMT6plex); Y8(Phospho); K10(TMT6plex)	G6PD	Glucose-6-phosphate 1-dehydrogenase	G6PD-pY401	-0.0795612	0.114734	-0.0426367	-0.195708	-0.197576	-0.190393	-0.0584647	-0.390694	-0.227648
kDASSQDcyDIPR	N-Term(TMT6plex); K1(TMT6plex); C8(Carbamidomethyl); Y9(Phospho)	GAB1	GRB2-associated-binding protein 1	GAB1-pY406	-0.371006	0.192952	0.115908	2.90265	2.96269	2.91105	2.57737	2.41002	2.70744
aPSASVDSSLyNLPR	N-Term(TMT6plex); Y11(Phospho)	GAB1	GRB2-associated-binding protein 1	GAB1-pY259	-0.0503654	0.101148	-0.0563684	2.1084	1.95539	1.81861	2.33918	2.41871	2.83311
dASSQDcyDIPR	N-Term(TMT6plex); C7(Carbamidomethyl); Y8(Phospho)	GAB1	GRB2-associated-binding protein 1	GAB1-pY406	0.0256426	-0.0598824	0.0324179	3.17117	3.12348	3.11634	2.60969	2.57566	2.65547
qVEyLDLDLDSGk	N-Term(TMT6plex); Y4(Phospho); K13(TMT6plex)	GAB1	GRB2-associated-binding protein 1	GAB1-pY627	-0.299615	0.0547698	0.200175	2.96668	3.02012	3.06239	3.79425	3.73991	3.7182
vDyVVVDQQk	N-Term(TMT6plex); Y3(Phospho); K10(TMT6plex)	GAB1	GRB2-associated-binding protein 1	GAB1-pY659	-0.0302781	0.0159807	0.0138266	3.28661	3.45773	3.48302	4.18391	4.18996	4.15061
sSGSGSSVADERVDyVVVDQQk	N-Term(TMT6plex); Y15(Phospho); K22(TMT6plex)	GAB1	GRB2-associated-binding protein 1	GAB1-pY659	-0.201937	-0.0475924	0.217935	3.68576	3.41087	3.51577	3.46585	3.77868	3.79266
vDyVQVDk	N-Term(TMT6plex); Y3(Phospho); K8(TMT6plex)	GAB2	GRB2-associated-binding protein 2	GAB2-pY643	0.14067	0.252076	-0.500905	2.18261	2.58075	2.49246	3.92288	3.60029	3.79811
dStYDLPR	N-Term(TMT6plex); T3(Phospho)	GAB2	GRB2-associated-binding protein 2	GAB2-pT265	-0.101541	0.280568	-0.228891	1.80707	1.73384	1.66021	1.26352	0.941957	1.27945
sTGSVDyLALDFQPSsPSPHR	N-Term(TMT6plex); Y7(Phospho); S16(Phospho)	GAB2	GRB2-associated-binding protein 2	GAB2-pY614-pS623	-0.222356	0.107615	0.0913815	0.735489	0.960342	-0.149869	1.04883	1.21184	1.06412
sELPyEELWLEEGkPSHQPLTR	N-Term(TMT6plex); Y5(Phospho); K14(TMT6plex)	GAREM1	GRB2-associated and regulator of MAPK protein 1	GAREM1-pY453	0.201073	-0.192281	-0.0361908	1.95564	2.23364	2.08193	2.58965	2.69279	2.67106
tDDYLDQPcyETINR	N-Term(TMT6plex); C9(Carbamidomethyl); Y10(Phospho)	GDI2	Rab GDP dissociation inhibitor beta	GDI2-pY203	-0.159616	-0.0188521	0.160557	-0.167593	0.338046	0.301563	0.216619	0.379288	0.588006
hGSGADSDyENTQSGDPLLGLEGk	N-Term(TMT6plex); Y9(Phospho); K24(TMT6plex)	GIT1	ARF GTPase-activating protein GIT1	GIT1-pY598	0.0697398	-0.111302	0.0352303	0.0285127	-0.0149414	0.024554	-0.365365	-0.2166	-0.291708
qNSTPESDyDNTPNDmEPDGmGSSR	N-Term(TMT6plex); Y9(Phospho); M16(Oxidation); M21(Oxidation)	GIT2	ARF GTPase-activating protein GIT2	GIT2-pY592	-0.213621	0.21757	-0.0367385	0.507225	0.336631	0.299155	-0.633713	0.243373	-0.0075575
qASEQNWANySAEQNR	N-Term(TMT6plex); Y10(Phospho)	GJA1	Gap junction alpha-1 protein	GJA1-pY313	-0.0561245	0.0433232	0.0110244	0.0933815	0.214535	0.154978	-0.077117	0.258147	0.00241939
aYSQEEITQGFEETGDTLYAPySTHFQLQNQPPQk	N-Term(TMT6plex); Y22(Phospho); K35(TMT6plex)	GPRC5A	Retinoic acid-induced protein 3	GPRC5A-pY320	-0.192475	0.0346291	0.138295	0.156067	0.329727	0.166513	0.0226655	0.221183	0.551661
aYSQEEITQGFEETGDTLYAPYStHFQLQNQPPQk	N-Term(TMT6plex); T24(Phospho); K35(TMT6plex)	GPRC5A	Retinoic acid-induced protein 3	GPRC5A-pT322	0.279915	-0.0783096	-0.253756	0.166953	-0.0916857	0.410357	0.048804	0.0417629	0.232947
vPSEGAyDIILPR	N-Term(TMT6plex); Y7(Phospho)	GPRC5C	G-protein coupled receptor family C group 5 member C	GPRC5C-pY387	-0.0612207	0.0358635	0.0234356	0.0671843	0.105876	0.150658	0.0300691	0.273777	0.201045
nPyVWD	N-Term(TMT6plex); Y3(Phospho)	GPRC5C	G-protein coupled receptor family C group 5 member C	GPRC5C-pY438	0.204993	-0.348227	0.086472	0.277875	0.113852	0.627393	0.254907	0.421684	0.753248
gEPNVsYIcSR	N-Term(TMT6plex); S6(Phospho); C9(Carbamidomethyl)	GSK3A; GSK3B	Glycogen synthase kinase-3 alpha; Glycogen synthase kinase-3 beta	GSK3A-pS278; GSK3B-pS215	0.0943949	-0.104818	0.0035448	-0.171257	-0.131683	-0.0885995	-0.138708	-0.0997658	-0.223347
gEPNVSyIcSR	N-Term(TMT6plex); Y7(Phospho); C9(Carbamidomethyl)	GSK3A; GSK3B	Glycogen synthase kinase-3 alpha; Glycogen synthase kinase-3 beta	GSK3A-pY279; GSK3B-pY216	0.040575	-0.0269654	-0.0145087	-0.155204	-0.0475334	0.0265133	-0.0172449	-0.0349796	0.0441537
gEPNVSyIcsR	N-Term(TMT6plex); Y7(Phospho); C9(Carbamidomethyl); S10(Phospho)	GSK3A; GSK3B	Glycogen synthase kinase-3 alpha; Glycogen synthase kinase-3 beta	GSK3A-pY279-pS282; GSK3B-pY216-pS219	-0.0951187	0.0610941	0.0293443	0.596874	0.687977	0.757117	0.766139	0.707025	0.639863
aLGymER	N-Term(TMT6plex); Y4(Phospho); M5(Oxidation)	GTF3C3	General transcription factor 3C polypeptide 3	GTF3C3-pY471	-0.123726	0.14706	-0.0367111	-0.0272976	-0.151293	0.110852	0.0346831	0.0393194	0.0720952
mDyVEINIDHk	N-Term(TMT6plex); M1(Oxidation); Y3(Phospho); K11(TMT6plex)	HDLBP	Vigilin	HDLBP-pY437	-0.180542	0.110367	0.0539813	0.0727951	-0.0218365	0.0327486	0.303125	0.306818	0.0645804
vcEPcyEQLNR	N-Term(TMT6plex); C2(Carbamidomethyl); C5(Carbamidomethyl); Y6(Phospho)	HGS	Hepatocyte growth factor-regulated tyrosine kinase substrate	HGS-pY216	-0.134479	0.374972	-0.336088	0.293625	0.618822	0.328961	-0.184934	-0.187407	0.555062
sTyTSYPk	N-Term(TMT6plex); Y3(Phospho); K8(TMT6plex)	HGS	Hepatocyte growth factor-regulated tyrosine kinase substrate	HGS-pY286	0.0126525	0.0795159	-0.0976902	0.284254	-0.11199	0.154311	0.581371	-0.256651	0.164476
aVcSTyLQSR	N-Term(TMT6plex); C3(Carbamidomethyl); Y6(Phospho)	HIPK2; HIPK1	Homeodomain-interacting protein kinase 2; Homeodomain-interacting protein kinase 1	HIPK2-pY361; HIPK1-pY352	0.00452235	0.0261766	-0.0312817	0.0105318	-0.239179	-0.146249	-0.099101	0.00480611	-0.00579227
tVcSTyLQSR	N-Term(TMT6plex); C3(Carbamidomethyl); Y6(Phospho)	HIPK3	Homeodomain-interacting protein kinase 3	HIPK3-pY359	-0.00729	0.0260126	-0.0191029	0.0772957	-0.186163	-0.150631	-0.188352	-0.0877999	-0.0131416
tVcStYLQSR	N-Term(TMT6plex); C3(Carbamidomethyl); T5(Phospho)	HIPK3	Homeodomain-interacting protein kinase 3	HIPK3-pT358	0.017114	0.067462	-0.0889678	-0.210841	-0.15204	-0.102777	-0.101256	-0.0357295	-0.0980894
dYDDmsPR	N-Term(TMT6plex); M5(Oxidation); S6(Phospho)	HNRNPK	Heterogeneous nuclear ribonucleoprotein K	HNRNPK-pS284	-0.139105	0.229957	-0.121678	0.119485	0.125666	-0.367976	0.280828	-0.604262	-0.598412
nYILDQTNVyGSAQR	N-Term(TMT6plex); Y10(Phospho)	HNRNPUL1	Heterogeneous nuclear ribonucleoprotein U-like protein 1	HNRNPUL1-pY510	0.0998045	-0.155292	0.0432345	0.268306	0.813699	0.576192	0.67194	1.07278	1.75304
dyVAVNR	N-Term(TMT6plex); Y2(Phospho)	HRH1	Histamine H1 receptor	HRH1-pY321	-0.00386667	0.0428905	-0.0402286	0.314818	0.372432	0.366087	0.394463	-0.50307	-0.387032
yIDQEELNk	N-Term(TMT6plex); Y1(Phospho); K9(TMT6plex)	HSP90AA1; HSP90AB1; HSP90AB2P; HSP90AA2P	Heat shock protein HSP 90-alpha; Heat shock protein HSP 90-beta; Putative heat shock protein HSP 90-beta 2; Heat shock protein HSP 90-alpha A2	HSP90AA1-pY284; HSP90AB1-pY276; HSP90AB2P-pY198; HSP90AA2P-pY283	0.00979294	0.0152291	-0.0253576	-0.0645056	0.134046	0.108448	0.223196	0.283476	0.305492
yESLTDPSk	N-Term(TMT6plex); Y1(Phospho); K9(TMT6plex)	HSP90AA1; HSP90AB1; HSP90AB2P; HSP90AB4P; HSP90AB3P	Heat shock protein HSP 90-alpha; Heat shock protein HSP 90-beta; Putative heat shock protein HSP 90-beta 2; Putative heat shock protein HSP 90-beta 4; Putative heat shock protein HSP 90-beta-3	HSP90AA1-pY61; HSP90AB1-pY56; HSP90AB2P-pY56; HSP90AB4P-pY32; HSP90AB3P-pY56	0.203391	-0.209404	-0.0237039	-0.438283	-0.21409	-0.470517	0.00471362	-0.294917	-0.165192
hIyYITGETk	N-Term(TMT6plex); Y3(Phospho); K10(TMT6plex)	HSP90AA5P; HSP90AA1	Putative heat shock protein HSP 90-alpha A5; Heat shock protein HSP 90-alpha	HSP90AA5P-pY177; HSP90AA1-pY492	0.132149	0.149052	-0.330549	-0.120571	-0.122156	0.0497089	0.0434826	0.205175	-0.244067
sIyYITGESk	N-Term(TMT6plex); Y3(Phospho); K10(TMT6plex)	HSP90AB1; HSP90AB2P	Heat shock protein HSP 90-beta; Putative heat shock protein HSP 90-beta 2	HSP90AB1-pY484; HSP90AB2P-pY260	0.110694	0.124934	-0.269173	0.23317	0.126838	-0.159358	0.026076	0.468843	0.330888
dIYEtDYYR	N-Term(TMT6plex); T5(Phospho)	IGF1R; INSR	Insulin-like growth factor 1 receptor; Insulin receptor	IGF1R-pT1163; INSR-pT1187	0.187288	0.00143257	-0.216945	-0.0123631	0.280758	0.0531785	0.103196	0.206724	0.305618
dIYETDYyR	N-Term(TMT6plex); Y8(Phospho)	IGF1R; INSR	Insulin-like growth factor 1 receptor; Insulin receptor	IGF1R-pY1166; INSR-pY1190	0.157366	0.0100956	-0.188153	0.0689403	-0.0500162	0.341382	0.0781651	0.396134	0.195592
tLSEVDyAPAGPAR	N-Term(TMT6plex); Y7(Phospho)	INPPL1	Phosphatidylinositol 3,4,5-trisphosphate 5-phosphatase 2	INPPL1-pY1135	0.145836	-0.169852	0.00675669	3.29463	3.35926	3.39748	3.63602	3.66322	3.7732
lyEWISIDkDEAGAk	N-Term(TMT6plex); Y2(Phospho); K9(TMT6plex); K15(TMT6plex)	INPPL1	Phosphatidylinositol 3,4,5-trisphosphate 5-phosphatase 2	INPPL1-pY886	0.128465	-0.0152722	-0.124377	-0.423915	-0.24976	-0.211092	0.12142	0.227306	0.137078
lQQTyAALNSk	N-Term(TMT6plex); Y5(Phospho); K11(TMT6plex)	IQGAP1	Ras GTPase-activating-like protein IQGAP1	IQGAP1-pY1510	0.0599826	-0.0665561	0.00379227	0.367222	0.0184188	0.0422896	0.233648	0.176352	-0.058163
eEETGTEEymk	N-Term(TMT6plex); Y9(Phospho); M10(Oxidation); K11(TMT6plex)	IRS1	Insulin receptor substrate 1	IRS1-pY941	-0.0210806	-0.0466771	0.0653545	0.899652	0.120708	0.554834	0.555841	-0.848112	-1.53492
vDPNGymmmSPSGGcSPDIGGGPSSSSSSSNAVPSGTSYGk	N-Term(TMT6plex); Y6(Phospho); M7(Oxidation); M8(Oxidation); M9(Oxidation); C15(Carbamidomethyl); K41(TMT6plex)	IRS1	Insulin receptor substrate 1	IRS1-pY662	-0.18355	-0.134047	0.272853	0.200458	-0.57007	0.209823	0.173115	-0.0819445	-0.268568
sDDymPmSPASVSAPk	N-Term(TMT6plex); Y4(Phospho); M5(Oxidation); M7(Oxidation); K16(TMT6plex)	IRS2	Insulin receptor substrate 2	IRS2-pY675	0.110844	0.0707861	-0.201159	-0.127848	-0.18886	-0.336733	-0.212041	-0.0252139	-0.195455
aPYTcGGDSDQyVLmSSPVGR	N-Term(TMT6plex); C5(Carbamidomethyl); Y12(Phospho); M15(Oxidation)	IRS2	Insulin receptor substrate 2	IRS2-pY823	-0.0782632	-0.172803	0.221178	0.425439	0.25289	0.610073	0.573555	0.597512	0.470849
yIDNLEk	N-Term(TMT6plex); Y1(Phospho); K7(TMT6plex)	ITGA6	Integrin alpha-6	ITGA6-pY1110	-0.0574107	0.0523893	0.00292824	0.00104147	-0.0750261	-0.0502752	0.0220011	-0.0167131	-0.11816
wDTGENPIyk	N-Term(TMT6plex); Y9(Phospho); K10(TMT6plex)	ITGB1	Integrin beta-1	ITGB1-pY783	-0.02969	0.0540645	-0.0259354	-0.0506635	0.0728622	-0.0025893	-0.0257191	0.0980566	0.114313
eEPEALyAAVNk	N-Term(TMT6plex); Y7(Phospho); K12(TMT6plex)	ITSN2	Intersectin-2	ITSN2-pY968	0.0178514	0.0372011	-0.0567488	0.537089	0.737996	0.724631	1.51277	1.50472	1.50444
rEEPEALyAAVNk	N-Term(TMT6plex); Y8(Phospho); K13(TMT6plex)	ITSN2	Intersectin-2	ITSN2-pY968	0.0697157	0.0542929	-0.132673	0.77544	0.919474	0.928361	1.8161	1.79876	1.86108
qPAyTLVDR	N-Term(TMT6plex); Y4(Phospho)	JAG1	Protein jagged-1	JAG1-pY1176	0.00192405	-0.0437596	0.0406006	-0.182979	-0.0232142	0.0688081	0.183592	0.212315	0.339262
iTNDyIF	N-Term(TMT6plex); Y5(Phospho)	KCT2	Keratinocyte-associated transmembrane protein 2	KCT2-pY263	0.0322257	0.0197764	-0.05348	-0.0338669	-0.145747	-0.0241479	-0.238247	0.00149071	0.0326235
gPASDyGPEPTPPGPAAPAGTDTTSQLSYENYEk	N-Term(TMT6plex); Y6(Phospho); K34(TMT6plex)	KIRREL1	Kin of IRRE-like protein 1	KIRREL1-pY661	-0.473346	0.214439	0.162796	0.0691449	-0.05155	0.241656	0.011178	0.297785	0.41916
tPyEAYDPIGk	N-Term(TMT6plex); Y3(Phospho); K11(TMT6plex)	KIRREL1	Kin of IRRE-like protein 1	KIRREL1-pY721	-0.0370245	0.0673505	-0.0327631	-0.0049983	0.0918619	0.0115884	-0.179403	-0.0477023	-0.0421155
tPYEAyDPIGk	N-Term(TMT6plex); Y6(Phospho); K11(TMT6plex)	KIRREL1	Kin of IRRE-like protein 1	KIRREL1-pY724	-0.0297848	-0.02756	0.0556891	0.0380942	0.233911	0.220165	0.0812836	0.204259	0.272733
dPTNGyYNVR	N-Term(TMT6plex); Y6(Phospho)	KIRREL1	Kin of IRRE-like protein 1	KIRREL1-pY605	-0.108405	0.13262	-0.034893	-0.35923	-0.269539	-0.363512	0.188538	-0.121984	-0.00478376
aVLYADyR	N-Term(TMT6plex); Y7(Phospho)	KIRREL1	Kin of IRRE-like protein 1	KIRREL1-pY625	-0.00553521	-0.0147576	0.0200667	0.0526773	0.152079	0.19188	0.00621362	0.198298	0.229647
aVLyADYR	N-Term(TMT6plex); Y4(Phospho)	KIRREL1	Kin of IRRE-like protein 1	KIRREL1-pY622	-0.0258007	0.00136765	0.0240023	0.0398601	0.163499	0.157117	-0.0436287	0.105363	0.115059
fSYTSQHSDyGQR	N-Term(TMT6plex); Y10(Phospho)	KIRREL1	Kin of IRRE-like protein 1	KIRREL1-pY745	-0.266132	0.0177318	0.209251	0.371922	0.00271061	0.43894	0.133586	-0.133265	0.366065
lASyLDR	N-Term(TMT6plex); Y4(Phospho)	KRT18	Keratin, type I cytoskeletal 18	KRT18-pY94	0.128704	-0.0669984	-0.0708655	-0.0690057	-0.12105	-0.00404116	0.0491474	0.0867428	0.483191
sTFSTNyR	N-Term(TMT6plex); Y7(Phospho)	KRT18	Keratin, type I cytoskeletal 18	KRT18-pY13	0.0842684	-0.0480681	-0.0400529	-0.135072	-0.091434	-0.0766297	0.0246875	0.114286	0.179193
sAYGGPVGAGIR	N-Term(TMT6plex); S1(Phospho)	KRT7	Keratin, type II cytoskeletal 7	KRT7-pS53	-0.0665011	0.179335	-0.131808	-0.0917362	0.0359666	0.206282	0.415635	0.518346	0.659313
dVDAAymSk	N-Term(TMT6plex); Y6(Phospho); M7(Oxidation); K9(TMT6plex)	KRT7	Keratin, type II cytoskeletal 7	KRT7-pY205	0.0291697	0.0865243	-0.123801	0.033028	-0.0455479	-0.423456	-0.0580429	-0.531533	-0.315167
eyQEVmNSk	N-Term(TMT6plex); Y2(Phospho); M6(Oxidation); K9(TMT6plex)	KRT81; KRT85; KRT86; KRT87P; KRT82; KRT83	Keratin, type II cuticular Hb1; Keratin, type II cuticular Hb5; Keratin, type II cuticular Hb6; Putative keratin-87 protein; Keratin, type II cuticular Hb2; Keratin, type II cuticular Hb3	KRT81-pY389; KRT85-pY406; KRT86-pY389; KRT87P-pY221; KRT82-pY403; KRT83-pY394	0.43249	-0.468147	-0.108507	0.277123	0.295243	0.0546262	0.533061	-0.695818	0.140325
aQyDDIVTR	N-Term(TMT6plex); Y3(Phospho)	KRT81; KRT86	Keratin, type II cuticular Hb1; Keratin, type II cuticular Hb6	KRT81-pY282; KRT86-pY282	0.000166021	-0.0621969	0.0594666	2.23764	2.24127	2.19605	2.75892	2.87613	2.80683
aLNGAEPNyHSLPSAR	N-Term(TMT6plex); Y9(Phospho)	LAMTOR1	Ragulator complex protein LAMTOR1	LAMTOR1-pY40	-0.0302861	-0.0822399	0.105925	0.0933154	0.0106315	0.104864	0.0291372	0.0908576	0.081855
mPEkEPPPPyLPA	N-Term(TMT6plex); M1(Oxidation); K4(TMT6plex); Y10(Phospho)	LAPTM4A	Lysosomal-associated transmembrane protein 4A	LAPTM4A-pY230	-0.0278715	0.227523	-0.237336	-0.0226011	-0.0127862	-0.00918027	0.0845081	-0.196656	-0.0235577
ePPPPyLPA	N-Term(TMT6plex); Y6(Phospho)	LAPTM4A	Lysosomal-associated transmembrane protein 4A	LAPTM4A-pY230	-0.113965	0.0559631	0.0515837	-0.189817	-0.0261328	0.108103	0.291754	0.416635	0.61529
ePPPPyVSA	N-Term(TMT6plex); Y6(Phospho)	LAPTM4B	Lysosomal-associated transmembrane protein 4B	LAPTM4B-pY314	0.00777004	0.111782	-0.129674	-0.0590563	0.152707	0.116162	0.0730676	0.182866	0.262696
yHEEFEk	N-Term(TMT6plex); Y1(Phospho); K7(TMT6plex)	LASP1	LIM and SH3 domain protein 1	LASP1-pY122	0.163789	-0.0181983	-0.164383	2.83043	3.10436	3.00506	3.69364	3.00164	3.26759
lIEDNEyTAR	N-Term(TMT6plex); Y7(Phospho)	LCK; YES1; FYN; SRC	Tyrosine-protein kinase Lck; Tyrosine-protein kinase Yes; Tyrosine-protein kinase Fyn; Proto-oncogene tyrosine-protein kinase Src	LCK-pY394; YES1-pY426; FYN-pY420; SRC-pY419	0.00776618	-0.020346	0.012363	0.0752263	0.175594	0.131755	-0.461724	-0.401884	-0.342062
qVVESAyEVIk	N-Term(TMT6plex); Y7(Phospho); K11(TMT6plex)	LDHA	L-lactate dehydrogenase A chain	LDHA-pY239	-0.0405413	0.0230028	0.0166929	-0.188407	-0.103926	-0.0956062	-0.0774239	0.0748761	0.0294613
mVVESAyEVIk	N-Term(TMT6plex); M1(Oxidation); Y7(Phospho); K11(TMT6plex)	LDHB	L-lactate dehydrogenase B chain	LDHB-pY240	-0.0550077	0.116776	-0.0692976	-0.137161	-0.0748412	-0.163017	-0.00336986	0.0125198	-0.0163764
tTEDEVHIcHNQDGySYPSR	N-Term(TMT6plex); C9(Carbamidomethyl); Y15(Phospho)	LDLR	Low-density lipoprotein receptor	LDLR-pY845	-0.0609737	-0.0539972	0.108517	-0.495249	-0.19773	-0.112205	0.0246676	0.139231	-0.0489631
gLGEHEmEEDEEDyESSAk	N-Term(TMT6plex); M7(Oxidation); Y14(Phospho); K19(TMT6plex)	LNPEP	Leucyl-cystinyl aminopeptidase	LNPEP-pY70	-0.519355	0.435034	-0.0734339	0.0142478	0.0360186	0.351199	0.282063	-0.0667562	-0.0156737
nDSDPtYGQQGHPNTWk	N-Term(TMT6plex); T6(Phospho); K17(TMT6plex)	LPP	Lipoma-preferred partner	LPP-pT316	0.0338077	-0.0301949	-0.00433228	0.0355287	0.102664	0.0217769	-0.115104	-0.186701	-0.149453
nDSDPTyGQQGHPNTWk	N-Term(TMT6plex); Y7(Phospho); K17(TMT6plex)	LPP	Lipoma-preferred partner	LPP-pY317	-0.0541076	0.0173473	0.0352201	0.0941248	0.119326	0.0958017	-0.0969286	-0.100568	-0.0546403
gGmDyAYIPPPGLQPEPGYGYAPNQGR	N-Term(TMT6plex); M3(Oxidation); Y5(Phospho)	LPP	Lipoma-preferred partner	LPP-pY273	0.468241	-0.460343	-0.168503	0.197136	1.01103	0.646909	0.281264	-0.111262	0.784064
yYEGYyAAGPGYGGR	N-Term(TMT6plex); Y6(Phospho)	LPP	Lipoma-preferred partner	LPP-pY301	-0.00992532	-0.163432	0.155695	0.681394	0.479625	0.553109	0.625064	0.79136	0.523234
yYEGyYAAGPGYGGR	N-Term(TMT6plex); Y5(Phospho)	LPP	Lipoma-preferred partner	LPP-pY300	0.071851	-0.343622	0.215213	1.06609	0.983866	1.16154	1.40907	1.50655	1.62519
yyGYTGAFR	N-Term(TMT6plex); Y2(Phospho)	LTF	Lactotransferrin	LTF-pY545	0.0465718	0.0193517	-0.0684104	0.144048	0.173875	0.27148	0.116115	0.127569	0.218753
yYGyTGAFR	N-Term(TMT6plex); Y4(Phospho)	LTF	Lactotransferrin	LTF-pY547	0.0396391	-0.0171767	-0.023301	0.126969	0.202265	0.128962	0.215622	0.18004	0.164928
yYGYTGAFR	N-Term(TMT6plex); Y1(Phospho)	LTF	Lactotransferrin	LTF-pY544	0.0260028	-0.0612326	0.0333249	0.126015	0.0887664	0.226717	0.123484	0.142364	0.186806
vIEDNEyTAR	N-Term(TMT6plex); Y7(Phospho)	LYN; HCK	Tyrosine-protein kinase Lyn; Tyrosine-protein kinase HCK	LYN-pY397; HCK-pY411	-0.178468	0.108122	0.0545493	-0.0766904	0.00190916	0.013986	-0.255671	-0.618589	-0.532214
iEDPVyGIYYVDHINR	N-Term(TMT6plex); Y6(Phospho)	MAGI1	Membrane-associated guanylate kinase, WW and PDZ domain-containing protein 1	MAGI1-pY373	0.0725677	-0.0787002	0.00216669	0.0651697	0.0979842	0.0342364	-0.0846118	0.116084	-0.143036
eSsPLYSPTFSDSTSAVk	N-Term(TMT6plex); S3(Phospho); K18(TMT6plex)	MAP1B	Microtubule-associated protein 1B	MAP1B-pS1793	0.13987	0.161287	-0.35862	-0.165637	-0.454684	-0.114747	-0.187358	0.205927	0.10233
iSSyPEDNFPDEEk	N-Term(TMT6plex); Y4(Phospho); K14(TMT6plex)	MAP4K5	Mitogen-activated protein kinase kinase kinase kinase 5	MAP4K5-pY401	-0.198043	0.351421	-0.23031	3.19629	3.19282	3.24937	4.51127	4.61269	4.65198
vGSGTyGDVYk	N-Term(TMT6plex); Y6(Phospho); K11(TMT6plex)	MAP4K5	Mitogen-activated protein kinase kinase kinase kinase 5	MAP4K5-pY31	-0.224546	0.0828551	0.117727	-0.0705673	0.206451	0.315249	-0.353235	-0.124414	-0.241425
vADPDHDHTGFLTEYVAtR	N-Term(TMT6plex); T18(Phospho)	MAPK1	Mitogen-activated protein kinase 1	MAPK1-pT190	-0.141292	0.109099	0.0211091	-0.146118	-0.338199	-0.0217006	0.837395	0.658917	0.858054
vADPDHDHTGFLTEyVATR	N-Term(TMT6plex); Y15(Phospho)	MAPK1	Mitogen-activated protein kinase 1	MAPK1-pY187	0.0380773	-0.0402291	0.00108874	0.0995375	0.193623	0.108823	1.32502	1.46523	1.52948
vADPDHDHTGFLtEyVATR	N-Term(TMT6plex); T13(Phospho); Y15(Phospho)	MAPK1	Mitogen-activated protein kinase 1	MAPK1-pT185-pY187	0.0605528	-0.066582	0.00322382	0.530659	0.777971	0.592906	2.25781	2.19867	2.31369
tAGTSFmmTPyVVTR	N-Term(TMT6plex); M7(Oxidation); M8(Oxidation); Y11(Phospho)	MAPK10; MAPK8	Mitogen-activated protein kinase 10; Mitogen-activated protein kinase 8	MAPK10-pY223; MAPK8-pY185	0.00235887	-0.00325535	0.0008906	0.146869	0.131092	0.0971017	0.091456	-0.0973141	0.14174
qADEEmTGyVATR	N-Term(TMT6plex); M6(Oxidation); Y9(Phospho)	MAPK11	Mitogen-activated protein kinase 11	MAPK11-pY182	0.0826241	0.0778685	-0.175273	-0.121656	-0.0821649	-0.121614	0.337702	0.266868	0.123916
qADSEmTGyVVTR	N-Term(TMT6plex); M6(Oxidation); Y9(Phospho)	MAPK12	Mitogen-activated protein kinase 12	MAPK12-pY185	0.0275045	0.111186	-0.150983	0.111865	0.352713	0.0957725	0.482792	0.742597	0.576906
hTDDEmTGyVATR	N-Term(TMT6plex); M6(Oxidation); Y9(Phospho)	MAPK14	Mitogen-activated protein kinase 14	MAPK14-pY182	-0.00650294	0.0814526	-0.0794559	0.15636	0.175824	-0.019703	0.415046	0.299665	0.416133
iADPEHDHTGFLtEyVATR	N-Term(TMT6plex); T13(Phospho); Y15(Phospho)	MAPK3	Mitogen-activated protein kinase 3	MAPK3-pT202-pY204	0.00674648	0.00974857	-0.0166395	0.472308	0.718853	0.724295	2.17698	2.19824	2.17275
iADPEHDHTGFLtEYVATR	N-Term(TMT6plex); T13(Phospho)	MAPK3	Mitogen-activated protein kinase 3	MAPK3-pT202	-0.145808	-0.125091	0.237785	0.286584	0.0675142	0.204401	1.07513	1.69567	1.61026
iADPEHDHTGFLTEyVATR	N-Term(TMT6plex); Y15(Phospho)	MAPK3	Mitogen-activated protein kinase 3	MAPK3-pY204	-0.00830999	-0.145725	0.139886	-0.0426841	0.0541505	0.0772095	1.33058	1.36729	1.49149
gLcTSPAEHQYFmTEyVATR	N-Term(TMT6plex); C3(Carbamidomethyl); M13(Oxidation); Y16(Phospho)	MAPK7	Mitogen-activated protein kinase 7	MAPK7-pY221	-0.208261	0.0546603	0.131992	0.00976255	0.0396609	0.199651	0.373261	0.256835	0.235862
tAcTNFmmTPyVVTR	N-Term(TMT6plex); C3(Carbamidomethyl); M7(Oxidation); M8(Oxidation); Y11(Phospho)	MAPK9	Mitogen-activated protein kinase 9	MAPK9-pY185	-0.239102	0.138117	0.0734906	0.48187	-0.0313725	0.195806	0.357306	0.157456	0.140295
dGAyENcQL	N-Term(TMT6plex); Y4(Phospho); C7(Carbamidomethyl)	MFAP3	Microfibril-associated glycoprotein 3	MFAP3-pY357	-0.139824	0.222533	-0.111556	-0.191642	-0.275612	0.14093	-0.167824	-0.0489788	0.00866828
dyHFVSR	N-Term(TMT6plex); Y2(Phospho)	MPP5	MAGUK p55 subfamily member 5	MPP5-pY528	0.131756	-0.0996715	-0.0422667	-0.0850719	-0.408855	0.121319	0.15017	0.0657325	-0.0940626
vyESIGQYGGETVk	N-Term(TMT6plex); Y2(Phospho); K14(TMT6plex)	MPP5	MAGUK p55 subfamily member 5	MPP5-pY243	0.130995	-0.132477	-0.0105889	0.205711	0.375322	0.363887	0.294412	0.14566	0.476781
sESVVyADIR	N-Term(TMT6plex); Y6(Phospho)	MPZL1	Myelin protein zero-like protein 1	MPZL1-pY263	-0.0145894	0.0349578	-0.0210213	-0.068869	0.0619769	0.115277	-0.0350686	0.148678	0.152192
aLELDSNLyR	N-Term(TMT6plex); Y9(Phospho)	MYH9	Myosin-9	MYH9-pY754	0.00599037	-0.0125496	0.00647779	-0.0384936	-0.0703948	0.0305353	-0.117571	0.00612277	0.172447
yLYVDk	N-Term(TMT6plex); Y1(Phospho); K6(TMT6plex)	MYH9	Myosin-9	MYH9-pY9	0.23307	-0.0623746	-0.205929	-0.148201	0.0855528	0.161788	0.613085	0.363842	0.618663
lyDLNmPAYVk	N-Term(TMT6plex); Y2(Phospho); M6(Oxidation); K11(TMT6plex)	NCK1	Cytoplasmic protein NCK1	NCK1-pY105	0.04335	0.0608587	-0.110278	-0.221361	-0.117775	-0.00932636	0.188227	0.0288856	0.115399
yHELPTLEER	N-Term(TMT6plex); Y1(Phospho)	NECTIN2	Nectin-2	NECTIN2-pY454	-0.046086	-0.154514	0.180154	-0.13774	0.22373	0.100761	0.357782	-0.147337	0.157762
tGHGyVYEYPSR	N-Term(TMT6plex); Y5(Phospho)	NEDD9	Enhancer of filamentation 1	NEDD9-pY164	0.156354	-0.115371	-0.0553091	0.0921253	0.295246	0.210665	0.863441	0.0319766	0.751874
sWmDDYDyVHLQGk	N-Term(TMT6plex); M3(Oxidation); Y8(Phospho); K14(TMT6plex)	NEDD9	Enhancer of filamentation 1	NEDD9-pY631	0.0221959	-0.0447471	0.0215313	0.00208853	0.0269684	0.111924	0.309176	0.142595	-0.0510662
dGVyDVPLHNPPDAk	N-Term(TMT6plex); Y4(Phospho); K15(TMT6plex)	NEDD9	Enhancer of filamentation 1	NEDD9-pY345	0.0107056	0.0283286	-0.0399007	0.111526	0.165972	0.171034	-0.120528	-0.0547538	-0.0542519
lyQVPNPQAAPR	N-Term(TMT6plex); Y2(Phospho)	NEDD9	Enhancer of filamentation 1	NEDD9-pY92	-0.034303	0.0505764	-0.0176829	-0.123557	0.0396226	-0.141577	-0.377478	-0.3669	-0.220578
gVyAIPPSAcR	N-Term(TMT6plex); Y3(Phospho); C10(Carbamidomethyl)	NEDD9	Enhancer of filamentation 1	NEDD9-pY223	0.0801421	-0.113473	0.0264712	-0.281626	-0.0375776	0.0734132	-0.15843	-0.132603	-0.0422168
tGHGYVyEYPSR	N-Term(TMT6plex); Y7(Phospho)	NEDD9	Enhancer of filamentation 1	NEDD9-pY166	0.0440612	0.00445692	-0.0500634	-0.357245	-0.411921	-0.142423	-0.695379	-0.304012	-0.270402
hQSLSPNHPPPQLGQSVGSQNDAyDVPR	N-Term(TMT6plex); Y24(Phospho)	NEDD9	Enhancer of filamentation 1	NEDD9-pY317	-0.00431517	-0.068667	0.0696581	0.108717	0.621657	-0.0122647	-0.174979	0.565511	0.409058
dkEISADLADLSEELDNyQk	N-Term(TMT6plex); K2(TMT6plex); Y18(Phospho); K20(TMT6plex)	NETO2	Neuropilin and tolloid-like protein 2	NETO2-pY422	-0.556399	0.308929	0.112654	-0.539992	0.559567	1.09282	0.552561	0.292061	0.416213
eHyVDLk	N-Term(TMT6plex); Y3(Phospho); K7(TMT6plex)	NME1	Nucleoside diphosphate kinase A	NME1-pY52	-2.09088	0.518286	0.414688	-2.43729	0.0522967	0.123282	-2.05341	0.570924	0.625013
qHyIDLk	N-Term(TMT6plex); Y3(Phospho); K7(TMT6plex)	NME2P1; NME2	Putative nucleoside diphosphate kinase; Nucleoside diphosphate kinase B	NME2P1-pY37; NME2-pY52	-2.35289	0.521023	0.453411	-2.32937	0.209108	0.208508	-2.35414	0.628427	0.67483
eHyAELR	N-Term(TMT6plex); Y3(Phospho)	NME3	Nucleoside diphosphate kinase 3	NME3-pY69	-0.181338	-0.0903742	0.237363	0.362358	0.999102	0.792231	1.14479	0.98064	0.0107382
dkLNTQSTySEA	N-Term(TMT6plex); K2(TMT6plex); Y9(Phospho)	NRP1	Neuropilin-1	NRP1-pY920	-0.0106679	0.0182422	-0.00775026	0.318485	0.173997	0.0866601	-0.0627565	-0.662727	-0.674086
dkLNTQSTYsEA	N-Term(TMT6plex); K2(TMT6plex); S10(Phospho)	NRP1	Neuropilin-1	NRP1-pS921	0.0912831	0.0871957	-0.196972	0.171379	0.083411	0.0320556	-0.0731142	-0.616688	-0.631249
lNTQStYSEA	N-Term(TMT6plex); T6(Phospho)	NRP1	Neuropilin-1	NRP1-pT919	0.180135	-0.0463082	-0.154251	0.459035	0.163423	0.274605	0.350402	-0.619311	-0.833123
lGAAPEEESAyVAGEkR	N-Term(TMT6plex); Y11(Phospho); K16(TMT6plex)	NSFL1C	NSFL1 cofactor p47	NSFL1C-pY167	-0.241969	-0.128118	0.309624	1.81635	1.44544	1.77465	2.07309	2.0935	2.57468
lGAAPEEESAyVAGEk	N-Term(TMT6plex); Y11(Phospho); K16(TMT6plex)	NSFL1C	NSFL1 cofactor p47	NSFL1C-pY167	0.123104	0.21714	-0.417931	1.38725	1.42486	1.62482	2.65629	2.41804	2.71753
iPVIENPQyFR	N-Term(TMT6plex); Y9(Phospho)	NTRK3	NT-3 growth factor receptor	NTRK3-pY516	-0.166031	0.150753	-0.00207878	0.20008	0.0702811	-0.420649	0.344617	0.772884	0.288427
vVDYSQFQEsDDADEDYGR	N-Term(TMT6plex); S10(Phospho)	NUCKS1	Nuclear ubiquitous casein and cyclin-dependent kinase substrate 1	NUCKS1-pS19	-0.0879109	0.0504097	0.0335912	-0.184053	-0.121801	0.0927379	0.122627	-0.0943342	0.191851
kVVDYSQFQEsDDADEDYGR	N-Term(TMT6plex); K1(TMT6plex); S11(Phospho)	NUCKS1	Nuclear ubiquitous casein and cyclin-dependent kinase substrate 1	NUCKS1-pS19	0.000183189	-0.00993969	0.00968971	-0.014417	-0.109139	-0.179692	-0.0528291	-0.106903	-0.0404868
nVSAGTQDVPSPPSDyVER	N-Term(TMT6plex); Y16(Phospho)	OCLN	Occludin	OCLN-pY315	0.0948785	-0.0652353	-0.0346993	0.390888	-0.0220348	0.270076	0.21755	-0.056427	0.517526
ySSGGNFETPSk	N-Term(TMT6plex); Y1(Phospho); K12(TMT6plex)	OCLN	Occludin	OCLN-pY368	0.071203	0.0149194	-0.0907835	0.204139	-0.346902	0.149637	-0.102122	0.371882	-0.125616
gDHPLTPGSHyA	N-Term(TMT6plex); Y11(Phospho)	ORAI1	Calcium release-activated calcium channel protein 1	ORAI1-pY300	-0.0505146	-0.00968823	0.05811	0.237011	0.35376	0.198156	0.14161	0.401833	0.301254
yAALSDQGLDIk	N-Term(TMT6plex); Y1(Phospho); K12(TMT6plex)	PALLD	Palladin	PALLD-pY1348	0.190815	-0.201655	-0.0158999	0.66058	0.961027	0.753012	0.981681	1.20316	1.55288
eRDyAEIQDFHR	N-Term(TMT6plex); Y4(Phospho)	PARD3	Partitioning defective 3 homolog	PARD3-pY1080	0.00536373	0.0396857	-0.0463469	0.210012	0.201725	0.201114	0.194082	0.155064	0.0402297
fSPDSQyIDNR	N-Term(TMT6plex); Y7(Phospho)	PARD3	Partitioning defective 3 homolog	PARD3-pY388	0.0135706	-0.007571	-0.00609633	0.387371	0.440006	0.446337	0.374545	0.380735	0.445234
iSHSLySGIEGLDESPSR	N-Term(TMT6plex); Y6(Phospho)	PARD3	Partitioning defective 3 homolog	PARD3-pY719	0.355241	-0.576978	0.0709858	0.621188	0.225741	0.181829	0.754765	0.923698	0.504819
eGHmmDALyAQVk	N-Term(TMT6plex); M4(Oxidation); M5(Oxidation); Y9(Phospho); K13(TMT6plex)	PARD3	Partitioning defective 3 homolog	PARD3-pY1127	-0.0994634	0.196264	-0.118896	-0.261845	0.000907109	-0.380211	-0.343506	-0.499933	-0.355506
dLAEDLyDGQVLQk	N-Term(TMT6plex); Y7(Phospho); K14(TMT6plex)	PARVA	Alpha-parvin	PARVA-pY124	0.0726334	-0.00612472	-0.0700548	-0.118753	0.028262	0.0297146	-0.11766	-0.0219134	-0.0894571
aAAYDIsEDEED	N-Term(TMT6plex); S7(Phospho)	PCYT1A	Choline-phosphate cytidylyltransferase A	PCYT1A-pS362	-0.0745579	-0.234623	0.263587	0.10284	-0.0469814	-0.143147	0.414546	0.557514	0.427305
qYTsPEEIDAQLQAEk	N-Term(TMT6plex); S4(Phospho); K16(TMT6plex)	PDAP1	28 kDa heat- and acid-stable phosphoprotein	PDAP1-pS19	-0.111948	0.578241	-0.781817	1.23681	1.12594	0.672463	1.69239	1.53497	1.32509
kVmDsDEDDDY	N-Term(TMT6plex); K1(TMT6plex); M3(Oxidation); S5(Phospho)	PDCD5	Programmed cell death protein 5	PDCD5-pS119	-0.0231072	0.1332	-0.121603	-0.19058	-0.258167	-0.27408	0.0557677	-0.682988	-0.504715
vmDsDEDDDY	N-Term(TMT6plex); M2(Oxidation); S4(Phospho)	PDCD5	Programmed cell death protein 5	PDCD5-pS119	0.311139	0.0522705	-0.469094	0.431733	0.289629	0.3545	0.139566	-0.161265	0.318583
vTPPEGyEVVTVFPk	N-Term(TMT6plex); Y7(Phospho); K15(TMT6plex)	PDLIM1	PDZ and LIM domain protein 1	PDLIM1-pY321	-0.0303282	-0.097668	0.11937	2.78703	2.80307	2.81096	3.581	3.75477	3.8528
yTEFyHVPTHSDASk	N-Term(TMT6plex); Y5(Phospho); K15(TMT6plex)	PDLIM5	PDZ and LIM domain protein 5	PDLIM5-pY251	-0.194447	0.239755	-0.0811559	0.42866	0.343092	0.193546	0.974562	1.03711	0.102715
sTSSPyHAGNLLQR	N-Term(TMT6plex); Y6(Phospho)	PEAK1	Inactive tyrosine-protein kinase PEAK1	PEAK1-pY880	0.143781	0.036554	-0.201673	0.740598	0.715524	0.491666	1.59211	1.08917	1.31549
yQEVWTSSTSPR	N-Term(TMT6plex); Y1(Phospho)	PEAK1	Inactive tyrosine-protein kinase PEAK1	PEAK1-pY531	0.0822185	-0.016495	-0.0698703	0.208656	0.276157	0.405775	1.13554	1.32048	1.23548
tTSVISHTyEEIETESk	N-Term(TMT6plex); Y9(Phospho); K17(TMT6plex)	PEAK1	Inactive tyrosine-protein kinase PEAK1	PEAK1-pY665	-0.04435	0.0539366	-0.0113267	0.791457	0.93834	1.01174	1.75243	1.67378	1.8058
eIEPNyESPSSNNQDk	N-Term(TMT6plex); Y6(Phospho); K16(TMT6plex)	PEAK1	Inactive tyrosine-protein kinase PEAK1	PEAK1-pY387	0.298946	-0.245973	-0.110125	-0.195824	-0.0594193	-0.279782	0.55305	0.0758036	0.439934
eDGkEDISDPmDPNPcSATySNLGQSR	N-Term(TMT6plex); K4(TMT6plex); M11(Oxidation); C16(Carbamidomethyl); Y20(Phospho)	PEAK1	Inactive tyrosine-protein kinase PEAK1	PEAK1-pY1107	-0.171082	0.103104	0.0534469	0.159622	0.283494	0.144946	0.689981	0.269154	0.471018
eIEPNyESPSSNNQDkDSSQASk	N-Term(TMT6plex); Y6(Phospho); K16(TMT6plex); K23(TMT6plex)	PEAK1	Inactive tyrosine-protein kinase PEAK1	PEAK1-pY387	-0.258076	0.164022	0.0612795	0.657482	1.11507	0.889653	1.31576	1.28946	1.21107
yFyTSA	N-Term(TMT6plex); Y3(Phospho)	PERP	p53 apoptosis effector related to PMP-22	PERP-pY190	-0.0473083	0.111117	-0.0706705	-0.0121945	-0.0201022	-0.0088979	0.113333	0.42684	0.198949
yFYTSA	N-Term(TMT6plex); Y1(Phospho)	PERP	p53 apoptosis effector related to PMP-22	PERP-pY188	-0.0415211	0.0475075	-0.00738799	0.149715	0.289586	-0.0200937	0.106583	0.140856	0.129514
cyEmASHLR	N-Term(TMT6plex); C1(Carbamidomethyl); Y2(Phospho); M4(Oxidation)	PFN1	Profilin-1	PFN1-pY129	-0.0608822	-0.0421706	0.0977856	0.319425	-0.37302	-0.395838	0.228998	-0.505123	-0.348119
hyGGLTGLNk	N-Term(TMT6plex); Y2(Phospho); K10(TMT6plex)	PGAM4; PGAM1; PGAM2	Probable phosphoglycerate mutase 4; Phosphoglycerate mutase 1; Phosphoglycerate mutase 2	PGAM4-pY92; PGAM1-pY92; PGAM2-pY92	-0.0144377	0.00322371	0.0110956	-0.119472	-0.125353	-0.142772	-0.0593779	-0.0499366	-0.0994687
eLNyFAk	N-Term(TMT6plex); Y4(Phospho); K7(TMT6plex)	PGK1	Phosphoglycerate kinase 1	PGK1-pY196	-0.0509077	0.0809318	-0.0336134	-0.208357	-0.0697323	-0.0397995	0.0472774	5.4741e-05	0.0698185
gSGELyEHEk	N-Term(TMT6plex); Y6(Phospho); K10(TMT6plex)	PIK3CD	Phosphatidylinositol 4,5-bisphosphate 3-kinase catalytic subunit delta isoform	PIK3CD-pY524	0.159165	0.14251	-0.359313	0.14575	-0.114013	-0.442578	0.165886	-0.934718	-0.554887
eYDRLyEEYTR	N-Term(TMT6plex); Y6(Phospho)	PIK3R1; PIK3R3	Phosphatidylinositol 3-kinase regulatory subunit alpha; Phosphatidylinositol 3-kinase regulatory subunit gamma	PIK3R1-pY467; PIK3R3-pY199	-0.12449	0.0511511	0.0656829	-0.241369	-0.0539105	-0.092421	-0.298993	-0.0118673	0.210121
lyEEYTR	N-Term(TMT6plex); Y2(Phospho)	PIK3R1; PIK3R3	Phosphatidylinositol 3-kinase regulatory subunit alpha; Phosphatidylinositol 3-kinase regulatory subunit gamma	PIK3R1-pY467; PIK3R3-pY199	-0.0145825	0.0572285	-0.0445504	-0.361947	-0.0154129	-0.222324	-0.0683824	-0.113188	-0.137532
eYDQLyEEYTR	N-Term(TMT6plex); Y6(Phospho)	PIK3R2	Phosphatidylinositol 3-kinase regulatory subunit beta	PIK3R2-pY464	-0.0175291	0.00138024	0.0159536	-0.201492	-0.0857088	-0.0461323	0.0646901	0.170548	0.139922
nETEDQyALmEDEDDLPHHEER	N-Term(TMT6plex); Y7(Phospho); M10(Oxidation)	PIK3R2	Phosphatidylinositol 3-kinase regulatory subunit beta	PIK3R2-pY605	0.25158	-0.0190882	-0.281679	2.74393	2.6611	2.65847	2.87658	2.87324	2.78926
qAHLyR	N-Term(TMT6plex); Y5(Phospho)	PKM	Pyruvate kinase PKM	PKM-pY466	-0.0188243	0.111209	-0.100314	0.317628	0.188342	0.152052	0.0867249	-0.311126	-0.0949155
gDyPLEAVR	N-Term(TMT6plex); Y3(Phospho)	PKM	Pyruvate kinase PKM	PKM-pY370	0.0962345	0.0647665	-0.17608	-0.343792	-0.135486	-0.215221	0.0254293	0.154547	0.263562
iTLDNAymEk	N-Term(TMT6plex); Y7(Phospho); M8(Oxidation); K10(TMT6plex)	PKM	Pyruvate kinase PKM	PKM-pY148	-0.00386428	0.0804156	-0.0810759	0.00378951	-0.220941	-0.21051	0.287884	-0.0116207	0.305015
gQyHTLQAGFSSR	N-Term(TMT6plex); Y3(Phospho)	PKP3	Plakophilin-3	PKP3-pY84	-0.147474	0.070291	0.0665942	2.13897	2.2304	2.19394	3.19064	3.33036	3.13562
aDyDTLSLR	N-Term(TMT6plex); Y3(Phospho)	PKP3	Plakophilin-3	PKP3-pY176	0.0091377	0.0151903	-0.0246466	1.33088	1.42379	1.4066	2.08901	2.27561	2.24045
yQQPFEDFR	N-Term(TMT6plex); Y1(Phospho)	PLCG1	1-phosphatidylinositol 4,5-bisphosphate phosphodiesterase gamma-1	PLCG1-pY1253	-0.020526	-0.25673	0.235291	4.15432	4.38085	4.28642	4.6511	4.86423	4.84753
iGTAEPDyGALYEGR	N-Term(TMT6plex); Y8(Phospho)	PLCG1	1-phosphatidylinositol 4,5-bisphosphate phosphodiesterase gamma-1	PLCG1-pY771	-0.000957781	0.236184	-0.281403	1.78874	2.13401	1.75482	2.23501	2.18958	2.01948
gYYSPySVSGSGSTAGSR	N-Term(TMT6plex); Y6(Phospho)	PLEC	Plectin	PLEC-pY4615	-0.100436	0.081261	0.0133644	0.488089	0.776219	0.885187	1.39087	1.38306	1.32821
sSsVGSSSSYPISPAVSR	N-Term(TMT6plex); S3(Phospho)	PLEC	Plectin	PLEC-pS4386	0.0127682	-0.214657	0.175505	0.0618661	-0.254817	0.186136	0.138887	0.114642	0.0758365
sADDTyLQLk	N-Term(TMT6plex); Y6(Phospho); K10(TMT6plex)	PLEKHA7	Pleckstrin homology domain-containing family A member 7	PLEKHA7-pY656	0.0939559	0.264205	-0.450611	1.11608	1.37431	1.43781	2.16362	2.23029	1.95104
lGGPcPPSSNSGISATcyGSGGR	N-Term(TMT6plex); C5(Carbamidomethyl); C17(Carbamidomethyl); Y18(Phospho)	PMEPA1	Protein TMEPAI	PMEPA1-pY219	-0.156717	-0.079708	0.209998	0.50722	0.434093	0.723171	-0.0704741	0.55545	0.809082
qEDAPVVyLGSFR	N-Term(TMT6plex); Y8(Phospho)	PRAG1	Inactive tyrosine-protein kinase PRAG1	PRAG1-pY132	-0.0994905	0.0211167	0.0729877	0.280345	0.272836	0.280965	0.580355	0.768137	0.801584
eATQPEPIyAESTk	N-Term(TMT6plex); Y9(Phospho); K14(TMT6plex)	PRAG1	Inactive tyrosine-protein kinase PRAG1	PRAG1-pY413	0.0867815	-0.0207751	-0.070514	-0.062432	0.138309	-0.00435128	0.252151	0.0557656	0.153307
cPPAyTmVGLHNLEPR	N-Term(TMT6plex); C1(Carbamidomethyl); Y5(Phospho); M7(Oxidation)	PRAG1	Inactive tyrosine-protein kinase PRAG1	PRAG1-pY159	0.071542	0.25543	-0.404554	0.78856	0.589816	0.0971873	1.36183	1.74914	1.52475
lcDFGSASHVADNDITPYLVsR	N-Term(TMT6plex); C2(Carbamidomethyl); S21(Phospho)	PRPF4B	Serine/threonine-protein kinase PRP4 homolog	PRPF4B-pS852	-0.0739776	-0.0931666	0.153834	0.0803057	0.494626	0.102439	0.00915237	0.676718	0.162837
lcDFGSASHVADNDITPyLVSR	N-Term(TMT6plex); C2(Carbamidomethyl); Y18(Phospho)	PRPF4B	Serine/threonine-protein kinase PRP4 homolog	PRPF4B-pY849	-0.0210424	-0.104514	0.116846	-0.0236343	-0.00635336	0.0133821	-0.0577528	0.1197	0.103667
lcDFGSASHVADNDItPYLVSR	N-Term(TMT6plex); C2(Carbamidomethyl); T16(Phospho)	PRPF4B	Serine/threonine-protein kinase PRP4 homolog	PRPF4B-pT847	-0.158356	-0.0302009	0.169502	-0.136017	0.0883963	0.0766947	0.0299871	0.0669894	0.163743
dyPQYR	N-Term(TMT6plex); Y2(Phospho)	PRRC2C	Protein PRRC2C	PRRC2C-pY1218	-0.0192718	0.0426506	-0.024348	0.325232	-0.0740684	0.119561	0.257993	-0.786966	-0.439406
sILyDER	N-Term(TMT6plex); Y4(Phospho)	PSMA2	Proteasome subunit alpha type-2	PSMA2-pY57	0.0298884	0.0418497	-0.0745565	0.0506013	-0.0543504	-0.0171658	-0.0995413	0.0690908	0.086995
yEPPVPTR	N-Term(TMT6plex); Y1(Phospho)	PSMC1	26S proteasome regulatory subunit 4	PSMC1-pY25	0.0182842	0.0798668	-0.104193	-0.111288	0.151405	0.0472794	0.244771	0.141458	0.177107
ymEDsTYyk	N-Term(TMT6plex); M2(Oxidation); S5(Phospho); Y8(Phospho); K9(TMT6plex)	PTK2	Focal adhesion kinase 1	PTK2-pS574-pY577	0.0445178	0.19314	-0.276814	0.125631	-0.516412	-0.225356	-0.220811	-1.14706	-1.27355
ymEDSTyYk	N-Term(TMT6plex); M2(Oxidation); Y7(Phospho); K9(TMT6plex)	PTK2	Focal adhesion kinase 1	PTK2-pY576	0.0368404	0.0662284	-0.109111	-0.122598	-0.312262	-0.356228	-0.20099	-0.458111	-0.564208
ymEDSTYYk	N-Term(TMT6plex); Y1(Phospho); M2(Oxidation); K9(TMT6plex)	PTK2	Focal adhesion kinase 1	PTK2-pY570	0.010227	0.0633229	-0.077016	-0.238325	-0.236899	-0.589054	-0.220238	-0.162462	-0.311289
tHAVsVSETDDyAEIIDEEDTYTmPSTR	N-Term(TMT6plex); S5(Phospho); Y12(Phospho); M24(Oxidation)	PTK2	Focal adhesion kinase 1	PTK2-pS390-pY397	-0.381553	-0.126181	0.396308	0.782556	0.053109	0.551238	0.254326	0.202669	1.11585
tHAVSVSETDDyAEIIDEEDTYTmPSTR	N-Term(TMT6plex); Y12(Phospho); M24(Oxidation)	PTK2	Focal adhesion kinase 1	PTK2-pY397	-0.189375	-0.108701	0.257724	0.239851	0.334101	0.450039	0.227569	0.344539	-0.0826987
dyEIQR	N-Term(TMT6plex); Y2(Phospho)	PTK2	Focal adhesion kinase 1	PTK2-pY415	0.0117659	-0.022563	0.010535	0.316552	0.0230728	0.0478991	-0.00313917	-0.595987	-0.589906
lSSFTsYENPT	N-Term(TMT6plex); S6(Phospho)	PTK6	Protein-tyrosine kinase 6	PTK6-pS446	0.102497	0.0699057	-0.189808	0.188477	0.408639	0.257205	0.738257	0.778048	1.03278
lSSFTSyENPT	N-Term(TMT6plex); Y7(Phospho)	PTK6	Protein-tyrosine kinase 6	PTK6-pY447	-0.125	0.143072	-0.0309993	0.226925	0.164286	0.149785	0.740057	0.820021	0.800808
gHEyTNIk	N-Term(TMT6plex); Y4(Phospho); K8(TMT6plex)	PTPN11	Tyrosine-protein phosphatase non-receptor type 11	PTPN11-pY546	-0.0288831	-0.0201833	0.0478368	0.638216	0.435587	0.3863	1.549	0.943975	1.02474
vyENVGLmQQQk	N-Term(TMT6plex); Y2(Phospho); M8(Oxidation); K12(TMT6plex)	PTPN11	Tyrosine-protein phosphatase non-receptor type 11	PTPN11-pY584	0.186341	-0.0327275	-0.176976	2.6794	2.69336	2.58487	3.39224	3.22827	3.31923
iQNTGDyYDLYGGEk	N-Term(TMT6plex); Y7(Phospho); K15(TMT6plex)	PTPN11	Tyrosine-protein phosphatase non-receptor type 11	PTPN11-pY62	-0.00290148	-0.0053057	0.00817133	-0.128993	0.0466608	0.0512114	0.111166	0.1994	0.214606
eENPyAR	N-Term(TMT6plex); Y5(Phospho)	PTTG1IP	Pituitary tumor-transforming gene 1 protein-interacting protein	PTTG1IP-pY174	0.0418317	-0.137477	0.0860667	0.402551	0.370036	-0.136731	-0.0278356	-0.457612	-0.455623
fIHQQPQSSSPVyGSSAk	N-Term(TMT6plex); Y13(Phospho); K18(TMT6plex)	PXN	Paxillin	PXN-pY88	0.0344506	-0.0666829	0.0299863	-0.0735218	-0.0691743	-0.0315318	-0.253439	-0.184232	-0.255696
fIHQQPQSSsPVYGSSAk	N-Term(TMT6plex); S10(Phospho); K18(TMT6plex)	PXN	Paxillin	PXN-pS85	-0.0530858	-0.0485882	0.0965931	-0.0118212	0.13924	0.281468	-0.180968	0.117847	-0.221711
fIHQQPQSSsPVyGSSAk	N-Term(TMT6plex); S10(Phospho); Y13(Phospho); K18(TMT6plex)	PXN	Paxillin	PXN-pS85-pY88	-0.0239092	-0.0396641	0.0615061	0.254285	0.307067	0.249682	-0.0594329	-0.18369	0.145933
fIHQQPQsSsPVYGSSAk	N-Term(TMT6plex); S8(Phospho); S10(Phospho); K18(TMT6plex)	PXN	Paxillin	PXN-pS83-pS85	0.0860566	-0.123372	0.02927	0.102509	0.237954	-0.0720008	-0.148425	-0.0349202	-0.113744
vGEEEHVySFPNk	N-Term(TMT6plex); Y8(Phospho); K13(TMT6plex)	PXN	Paxillin	PXN-pY118	-0.0173454	0.0379089	-0.0213267	0.219238	0.308828	0.134232	-0.024094	-0.0826127	-0.0641745
vGEEEHVYsFPNk	N-Term(TMT6plex); S9(Phospho); K13(TMT6plex)	PXN	Paxillin	PXN-pS119	-0.0777634	0.0824438	-0.00916922	0.0360792	0.235365	0.284809	-0.100118	-0.231965	-0.108272
dDEyDYLFk	N-Term(TMT6plex); Y4(Phospho); K9(TMT6plex)	RAB11A; RAB11B	Ras-related protein Rab-11A; Ras-related protein Rab-11B	RAB11A-pY8; RAB11B-pY8	-0.0161384	-0.0584391	0.0715175	0.145562	0.167648	0.198645	1.18118	0.980659	0.938072
tyDYLFk	N-Term(TMT6plex); Y2(Phospho); K7(TMT6plex)	RAB8A; RAB8B	Ras-related protein Rab-8A; Ras-related protein Rab-8B	RAB8A-pY5; RAB8B-pY5	0.0214093	0.0221922	-0.0446155	-0.154092	-0.119655	-0.117828	-0.151464	0.0278895	0.148679
hPGGGDyEEL	N-Term(TMT6plex); Y7(Phospho)	RABL6	Rab-like protein 6	RABL6-pY726	0.0985605	-0.0746638	-0.0295409	0.705125	0.0466216	0.817627	0.722156	0.360607	0.449635
nLQYyDISAk	N-Term(TMT6plex); Y5(Phospho); K10(TMT6plex)	RAN	GTP-binding nuclear protein Ran	RAN-pY147	0.0993625	-0.322729	0.17523	-0.200466	-0.101868	0.119137	0.0922548	0.401107	-0.173983
sPSQDNTDSyFR	N-Term(TMT6plex); Y10(Phospho)	RASAL2	Ras GTPase-activating protein nGAP	RASAL2-pY672	-0.127273	0.224898	-0.126983	1.6459	1.97172	1.91761	3.37917	3.53267	3.38295
nSQEAEVScPFIDNTyScSGk	N-Term(TMT6plex); C9(Carbamidomethyl); Y16(Phospho); C18(Carbamidomethyl); K21(TMT6plex)	RBCK1	RanBP-type and C3HC4-type zinc finger-containing protein 1	RBCK1-pY330	-0.180595	-0.139246	0.274611	0.729727	0.516198	0.765404	2.57942	2.53665	2.81054
dVYLsPR	N-Term(TMT6plex); S5(Phospho)	RBMX; RBMXL1	RNA-binding motif protein, X chromosome; RNA binding motif protein, X-linked-like-1	RBMX-pS208; RBMXL1-pS208	0.0363373	0.0129919	-0.050731	-0.213859	0.0455807	-0.171333	-0.0981668	0.0471308	0.002947
eSSVGyR	N-Term(TMT6plex); Y6(Phospho)	RIN1	Ras and Rab interactor 1	RIN1-pY295	0.0279393	0.160268	-0.21265	0.362292	0.0609446	-0.00553249	0.438278	-0.237763	-0.0601265
ekPAQDPLyDVPNASGGQAGGPQRPGR	N-Term(TMT6plex); K2(TMT6plex); Y9(Phospho)	RIN1	Ras and Rab interactor 1	RIN1-pY36	0.0473931	-0.00737613	-0.0414115	-0.0393671	0.277986	0.00839758	0.164317	0.271007	0.184791
dYNIANtV	N-Term(TMT6plex); T7(Phospho)	RNF13	E3 ubiquitin-protein ligase RNF13	RNF13-pT380	0.086527	-0.155224	0.0568553	0.0766986	0.126478	0.217131	-0.0547643	0.469276	0.278753
dTLyEAVR	N-Term(TMT6plex); Y4(Phospho)	RPL10A	60S ribosomal protein L10a	RPL10A-pY11	0.0716935	-0.0218483	-0.0527746	-0.0949597	-0.0796537	-0.120737	-0.121675	0.200764	0.225671
yFQISQDEDEsESED	N-Term(TMT6plex); S11(Phospho)	RPL22L1	60S ribosomal protein L22-like 1	RPL22L1-pS118	0.206069	-0.623633	0.259935	-0.858896	0.418096	-0.122645	-0.237905	0.455566	0.878244
yFQISQDEDESEsED	N-Term(TMT6plex); S13(Phospho)	RPL22L1	60S ribosomal protein L22-like 1	RPL22L1-pS120	0.129738	0.368844	-0.702311	0.406768	0.600163	0.239427	0.518921	0.119101	0.122246
nNASTDyDLSDk	N-Term(TMT6plex); Y7(Phospho); K12(TMT6plex)	RPL3	60S ribosomal protein L3	RPL3-pY307	0.0609392	0.211259	-0.323449	0.0102951	-0.0855028	0.0821078	0.257415	-0.177349	-0.144461
sPyQEFTDHLVk	N-Term(TMT6plex); Y3(Phospho); K12(TMT6plex)	RPS2	40S ribosomal protein S2	RPS2-pY266	0.363375	-0.126074	-0.326903	0.988996	1.01125	0.833522	1.28736	1.6425	1.58348
lVQSPNSyFmDVk	N-Term(TMT6plex); Y8(Phospho); M10(Oxidation); K13(TMT6plex)	RPS27L; RPS27	40S ribosomal protein S27-like; 40S ribosomal protein S27	RPS27L-pY31; RPS27-pY31	0.0320448	0.0135443	-0.0467611	0.0013585	0.215613	0.1384	0.122951	0.127619	0.00747636
acyGVLR	N-Term(TMT6plex); C2(Carbamidomethyl); Y3(Phospho)	RPS3	40S ribosomal protein S3	RPS3-pY120	0.201988	0.127306	-0.400748	-0.0196274	-0.228873	0.164239	0.039273	0.128931	0.28018
aDHQPLTEASyVNLPTIALcNTDSPLR	N-Term(TMT6plex); Y11(Phospho); C20(Carbamidomethyl)	RPSA	40S ribosomal protein SA	RPSA-pY139	-0.00157406	0.209819	-0.24375	0.374245	0.568239	0.657983	0.498567	-0.0159675	0.78241
qyATLDVYNPFETR	N-Term(TMT6plex); Y2(Phospho)	SCAMP3	Secretory carrier-associated membrane protein 3	SCAMP3-pY35	-0.0679192	-0.274831	0.286218	0.656849	0.24852	0.0985634	0.93543	0.271397	0.470846
nYGSySTQASAAAATAELLk	N-Term(TMT6plex); Y5(Phospho); K20(TMT6plex)	SCAMP3	Secretory carrier-associated membrane protein 3	SCAMP3-pY86	0.0412401	-0.135833	0.0852315	0.355424	0.450004	0.156545	0.436307	0.5192	0.42829
qEEFyA	N-Term(TMT6plex); Y5(Phospho)	SDC1; SDC3	Syndecan-1; Syndecan-3	SDC1-pY309; SDC3-pY441	0.105026	-0.106213	-0.00656138	0.0265784	0.127878	0.0550155	0.0705307	0.26065	0.403195
aPTNEFyA	N-Term(TMT6plex); Y7(Phospho)	SDC4	Syndecan-4	SDC4-pY197	-0.436956	0.176024	0.178291	-0.168911	0.161667	0.0207397	-0.206321	0.294012	0.135628
kAPTNEFyA	N-Term(TMT6plex); K1(TMT6plex); Y8(Phospho)	SDC4	Syndecan-4	SDC4-pY197	0.0570679	0.0343142	-0.0960657	0.0378624	0.0281816	-0.0418868	0.104564	0.146588	0.176463
lYPELSQymGLSLNEEEIR	N-Term(TMT6plex); Y8(Phospho); M9(Oxidation)	SDCBP	Syntenin-1	SDCBP-pY56	-0.377738	0.0460976	0.260493	0.325694	0.630003	0.622716	-0.093354	0.083014	0.453648
lyPELSQYmGLSLNEEEIR	N-Term(TMT6plex); Y2(Phospho); M9(Oxidation)	SDCBP	Syntenin-1	SDCBP-pY50	-0.249046	-0.0637633	0.265175	0.0758872	0.153426	-0.225682	-0.0215209	-0.00420851	0.470944
iYHLPDAEsDEDEDFkEQTR	N-Term(TMT6plex); S9(Phospho); K16(TMT6plex)	SEPTIN2	Septin-2	SEPTIN2-pS218	0.140848	0.0143327	-0.172241	-0.102916	-0.11167	-0.123734	-0.196082	-0.032916	-0.047315
eyEVSI	N-Term(TMT6plex); Y2(Phospho)	SEZ6L; SEZ6L2	Seizure 6-like protein; Seizure 6-like protein 2	SEZ6L-pY1020; SEZ6L2-pY906	-0.0298075	-0.395679	0.333787	-0.331766	0.298347	0.313005	0.51721	0.320764	0.442129
nQDATVyVGGLDEk	N-Term(TMT6plex); Y7(Phospho); K14(TMT6plex)	SF3B4	Splicing factor 3B subunit 4	SF3B4-pY16	0.294423	-0.295001	-0.0610984	-0.366558	-0.560925	-0.349921	0.145434	0.287049	0.0490406
aVENQySFY	N-Term(TMT6plex); Y6(Phospho)	SH2B2	SH2B adapter protein 2	SH2B2-pY629	0.000837756	0.0667054	-0.0708197	1.63649	1.41849	1.75075	1.70715	1.80231	1.95997
aIDNQyTPL	N-Term(TMT6plex); Y6(Phospho)	SH2B3	SH2B adapter protein 3	SH2B3-pY572	-0.067657	0.313891	-0.316963	1.19019	1.26035	0.981136	1.6137	1.58488	1.65227
sQyHDLQAPDNQQTk	N-Term(TMT6plex); Y3(Phospho); K15(TMT6plex)	SH2D4A	SH2 domain-containing protein 4A	SH2D4A-pY131	-0.184377	-0.0512654	0.207745	2.66318	2.68353	2.77826	3.41475	3.44431	3.45418
qTENNyLEcQk	N-Term(TMT6plex); Y6(Phospho); C9(Carbamidomethyl); K11(TMT6plex)	SH3D19	SH3 domain-containing protein 19	SH3D19-pY452	-0.108775	0.341247	-0.311554	3.97331	4.22553	3.83276	5.36247	4.88872	4.7512
dkVTIADDySDPFDAk	N-Term(TMT6plex); K2(TMT6plex); Y9(Phospho); K16(TMT6plex)	SHB	SH2 domain-containing adapter protein B	SHB-pY246	0.0406124	0.0826659	-0.132141	0.508204	0.622642	0.689335	0.766227	0.680886	0.836343
aGkGESAGymEPYEAQR	N-Term(TMT6plex); K3(TMT6plex); Y9(Phospho); M10(Oxidation)	SHB	SH2 domain-containing adapter protein B	SHB-pY268	-0.475263	0.0603661	0.307934	1.63044	0.664413	0.914196	-0.475547	0.158041	0.193221
gESAGymEPYEAQR	N-Term(TMT6plex); Y6(Phospho); M7(Oxidation)	SHB	SH2 domain-containing adapter protein B	SHB-pY268	-0.0192894	0.0851647	-0.0702506	0.398574	0.338867	0.17437	0.449639	0.0822448	0.0356581
vTIADDySDPFDAk	N-Term(TMT6plex); Y7(Phospho); K14(TMT6plex)	SHB	SH2 domain-containing adapter protein B	SHB-pY246	0.0176091	0.0641868	-0.085858	0.693296	0.677744	0.704555	0.86852	0.715878	0.750727
lDycGGSGEPGGVQR	N-Term(TMT6plex); Y3(Phospho); C4(Carbamidomethyl)	SHB	SH2 domain-containing adapter protein B	SHB-pY114	-0.133283	-0.142458	0.241561	0.447874	0.997638	-0.237363	0.252006	0.421065	-0.13566
eLFDDPSyVNVQNLDk	N-Term(TMT6plex); Y8(Phospho); K16(TMT6plex)	SHC1	SHC-transforming protein 1	SHC1-pY427	-0.16815	-0.0829905	0.221466	3.17029	3.20524	3.21303	3.41385	3.53899	3.53291
rPVSFPETPyTVSPAGADR	N-Term(TMT6plex); Y10(Phospho)	SIPA1L3	Signal-induced proliferation-associated 1-like protein 3	SIPA1L3-pY1141	-0.220968	0.258419	-0.0803266	0.206183	0.491128	0.311132	0.571888	0.0763161	0.242658
qPSGSFSTPGSATyVR	N-Term(TMT6plex); Y14(Phospho)	SIPA1L3	Signal-induced proliferation-associated 1-like protein 3	SIPA1L3-pY1169	-0.0392896	-0.304778	0.283684	-0.152561	0.225835	-0.114585	-0.581633	-0.182284	0.160408
fSISPDEDSSSYSSNSDFNySYPTk	N-Term(TMT6plex); Y20(Phospho); K25(TMT6plex)	SLC38A2	Sodium-coupled neutral amino acid transporter 2	SLC38A2-pY28	-0.268982	0.0638712	0.169704	-0.0628038	0.112705	0.0997246	-0.161351	0.173072	-0.0921038
fSISPDEDSSSYSSNsDFNYSYPTk	N-Term(TMT6plex); S16(Phospho); K25(TMT6plex)	SLC38A2	Sodium-coupled neutral amino acid transporter 2	SLC38A2-pS24	-0.152607	0.24235	-0.124286	0.211219	0.185376	-0.0920574	0.536863	0.501543	0.817288
fSISPDEDSSSySSNSDFNYSYPTk	N-Term(TMT6plex); Y12(Phospho); K25(TMT6plex)	SLC38A2	Sodium-coupled neutral amino acid transporter 2	SLC38A2-pY20	0.0634521	0.0747615	-0.149041	-0.0863791	-0.0992888	0.00160877	0.215172	0.205408	0.143218
fSISPDEDSSsYSSNSDFNYSYPTk	N-Term(TMT6plex); S11(Phospho); K25(TMT6plex)	SLC38A2	Sodium-coupled neutral amino acid transporter 2	SLC38A2-pS19	0.0152036	0.111815	-0.137935	0.22897	0.106201	-0.000429206	-0.155584	-0.00959082	0.260118
sHyADVDPENQNFLLESNLGk	N-Term(TMT6plex); Y3(Phospho); K21(TMT6plex)	SLC38A2	Sodium-coupled neutral amino acid transporter 2	SLC38A2-pY41	0.00200962	-0.0065895	0.00455625	0.00556884	0.0611514	0.121876	0.0372803	0.0593401	0.0770269
fSISPDEDSSSYSSNSDFNYsYPTk	N-Term(TMT6plex); S21(Phospho); K25(TMT6plex)	SLC38A2	Sodium-coupled neutral amino acid transporter 2	SLC38A2-pS29	0.0749606	0.0146467	-0.094705	0.0105632	0.00993287	0.0392486	-0.133305	0.0485052	-0.020943
sYGEEDFEyHR	N-Term(TMT6plex); Y9(Phospho)	SLC4A2	Anion exchange protein 2	SLC4A2-pY73	-0.116213	0.146038	-0.0426542	0.265225	0.230923	0.651398	0.650003	0.552513	0.701515
yVDAETSL	N-Term(TMT6plex); Y1(Phospho)	SLC4A7	Sodium bicarbonate cotransporter 3	SLC4A7-pY1207	-0.173838	0.0365661	0.121479	0.214767	-0.105067	0.283284	-0.467608	0.160812	0.297662
gGyLQGNVNGR	N-Term(TMT6plex); Y3(Phospho)	SLC7A11	Cystine/glutamate transporter	SLC7A11-pY15	-0.0894705	0.0315499	0.0538381	0.180061	0.146459	0.14965	-0.237408	0.178638	0.150998
lTPDPyR	N-Term(TMT6plex); Y6(Phospho)	SON	Protein SON	SON-pY963	-0.0611396	0.0673993	-0.00916538	-0.241991	-0.0900781	0.0863779	0.0717725	-0.361701	0.0359903
ySISDR	N-Term(TMT6plex); Y1(Phospho)	SOS1	Son of sevenless homolog 1	SOS1-pY1196	-0.0556944	0.296221	-0.304105	5.26909	4.81772	4.72483	5.20619	4.16819	4.37876
qSHSGSIsPYPk	N-Term(TMT6plex); S8(Phospho); K12(TMT6plex)	SRRM2	Serine/arginine repetitive matrix protein 2	SRRM2-pS994	-0.038319	0.210302	-0.202106	-0.222615	-0.257319	0.342909	0.259506	-0.128749	0.361255
sStPPGESYFGVSSLQLk	N-Term(TMT6plex); T3(Phospho); K18(TMT6plex)	SRRM2	Serine/arginine repetitive matrix protein 2	SRRM2-pT1043	-0.170019	-0.170624	0.290084	0.641913	0.377417	0.439135	0.664103	0.542408	0.656242
sHEGETAyIR	N-Term(TMT6plex); Y8(Phospho)	SRSF1	Serine/arginine-rich splicing factor 1	SRSF1-pY189	0.256747	-0.132371	-0.163451	0.536845	0.152874	0.811694	0.250708	0.0129655	0.637926
dADDAVyELNGk	N-Term(TMT6plex); Y7(Phospho); K12(TMT6plex)	SRSF6; SRSF4	Serine/arginine-rich splicing factor 6; Serine/arginine-rich splicing factor 4	SRSF6-pY53; SRSF4-pY53	-0.283592	0.201077	0.0411034	-0.0425909	0.367944	0.138424	0.161309	-0.0202096	0.706694
gsPHYFSPFRPY	N-Term(TMT6plex); S2(Phospho)	SRSF9	Serine/arginine-rich splicing factor 9	SRSF9-pS211	-0.15228	0.00855892	0.129906	-0.568805	-0.125048	-0.175866	-0.0478286	0.172416	-0.0706278
tTNPFYNtm	N-Term(TMT6plex); T8(Phospho); M9(Oxidation)	SSH2	Protein phosphatase Slingshot homolog 2	SSH2-pT1422	-0.029385	0.203848	-0.203575	0.0405443	-0.0645841	-0.0957333	0.276965	-0.0562592	0.145956
eGmNPSYDEYADsDEDQHDAYLER	N-Term(TMT6plex); M3(Oxidation); S13(Phospho)	SSRP1	FACT complex subunit SSRP1	SSRP1-pS444	0.00449753	0.0453508	-0.0514834	0.0428434	-0.435973	-0.0416682	0.0147702	-0.478772	0.110234
aNyLEDR	N-Term(TMT6plex); Y3(Phospho)	STXBP3	Syntaxin-binding protein 3	STXBP3-pY521	0.140779	-0.140303	-0.0142505	2.55811	2.65414	2.69609	3.03023	2.61256	2.77283
gPAyGLSR	N-Term(TMT6plex); Y4(Phospho)	TAGLN2	Transgelin-2	TAGLN2-pY8	-0.0863003	0.112426	-0.0335398	1.45725	1.74753	1.66072	1.903	1.82478	1.90223
gASQAGmTGyGmPR	N-Term(TMT6plex); M7(Oxidation); Y10(Phospho); M12(Oxidation)	TAGLN3; TAGLN2	Transgelin-3; Transgelin-2	TAGLN3-pY192; TAGLN2-pY192	-0.191592	0.18768	-0.0211736	1.21018	0.958784	1.00934	1.68663	1.44363	1.56558
lGEyEDVSR	N-Term(TMT6plex); Y4(Phospho)	TBCB	Tubulin-folding cofactor B	TBCB-pY98	-0.195214	0.0971229	0.0798638	3.07285	2.90693	2.95917	3.22527	3.08841	3.21199
sAFSNLFGGEPLSyTR	N-Term(TMT6plex); Y14(Phospho)	TFRC	Transferrin receptor protein 1	TFRC-pY20	-0.26029	0.410489	-0.258522	0.145835	0.415454	0.362743	0.634331	0.615138	0.576259
ymAPEVLESR	N-Term(TMT6plex); Y1(Phospho); M2(Oxidation)	TGFBR2	TGF-beta receptor type-2	TGFBR2-pY424	-0.21228	0.178111	0.00780821	0.0782663	0.22251	-0.149911	0.16248	0.116748	0.0196057
lSYLSAPGSEySmYSTDSR	N-Term(TMT6plex); Y11(Phospho); M13(Oxidation)	TJP1	Tight junction protein ZO-1	TJP1-pY830	0.018184	0.0845597	-0.109434	-0.0158082	-0.672646	-0.591512	-0.222556	0.0223455	-0.0894595
iGITNHDEYsLVR	N-Term(TMT6plex); S10(Phospho)	TLN1	Talin-1	TLN1-pS128	0.0116338	0.0156383	-0.0276678	-0.0628385	-0.250142	-0.0740948	0.181449	0.336101	0.0458057
iGITNHDEySLVR	N-Term(TMT6plex); Y9(Phospho)	TLN1	Talin-1	TLN1-pY127	-0.102311	0.0425186	0.0545712	0.0505628	-0.223236	0.130065	0.155068	0.139242	0.213514
kSTVLQQQyNR	N-Term(TMT6plex); K1(TMT6plex); Y9(Phospho)	TLN1	Talin-1	TLN1-pY436	-0.0455573	0.0277286	0.016751	-0.141097	-0.0503024	-0.156861	-0.103322	-0.131485	-0.10706
sTVLQQQyNR	N-Term(TMT6plex); Y8(Phospho)	TLN1	Talin-1	TLN1-pY436	0.119874	-0.0654667	-0.0623178	-0.188201	-0.0884457	-0.187441	-0.124805	0.0191168	0.134596
tmQFEPSTmVyDAcR	N-Term(TMT6plex); M2(Oxidation); M9(Oxidation); Y11(Phospho); C14(Carbamidomethyl)	TLN1	Talin-1	TLN1-pY26	-0.159077	0.160964	-0.0198015	0.0681342	0.0444408	0.150129	0.0791007	-0.0661797	-0.0366363
ecDySIDGINR	N-Term(TMT6plex); C2(Carbamidomethyl); Y4(Phospho)	TLN2	Talin-2	TLN2-pY1665	0.176806	-0.0488272	-0.147363	0.164553	0.269372	0.230016	0.242756	0.386932	0.320164
eDAyDGVTSENmR	N-Term(TMT6plex); Y4(Phospho); M12(Oxidation)	TMEM106B	Transmembrane protein 106B	TMEM106B-pY18	0.00842724	-0.0537752	0.0436659	-0.0679607	0.23635	-0.0766773	0.456796	0.188549	0.0710483
eQEEAIAQFPyVEFTGR	N-Term(TMT6plex); Y11(Phospho)	TMEM106C	Transmembrane protein 106C	TMEM106C-pY40	-0.00844881	-0.299728	0.255118	0.675199	0.927541	0.520065	0.476355	0.639667	0.880918
lSSTDDGyIDLQFk	N-Term(TMT6plex); Y8(Phospho); K14(TMT6plex)	TMEM230	Transmembrane protein 230	TMEM230-pY29	0.0498536	-0.112387	0.0562838	0.32939	-0.157068	0.186524	-0.11453	0.294285	0.257173
dREDyVPYTGEk	N-Term(TMT6plex); Y5(Phospho); K12(TMT6plex)	TMOD3	Tropomodulin-3	TMOD3-pY86	-0.350782	0.476075	-0.277732	1.7273	1.75521	1.72625	2.43978	2.46311	2.61813
eAQYsmLATWR	N-Term(TMT6plex); S5(Phospho); M6(Oxidation)	TNFRSF1A	Tumor necrosis factor receptor superfamily member 1A	TNFRSF1A-pS402	0.00704149	0.0833162	-0.0959487	-0.0818549	-0.349333	0.0277593	-0.0294956	-0.146417	-0.176318
kPTyDPVSEDQDPLSSDFk	N-Term(TMT6plex); K1(TMT6plex); Y4(Phospho); K19(TMT6plex)	TNK2	Activated CDC42 kinase 1	TNK2-pY518	-0.034831	0.0343624	-0.000361061	-0.0606759	0.27307	0.140536	1.10572	1.00103	1.12436
yATPQVIQAPGPR	N-Term(TMT6plex); Y1(Phospho)	TNK2	Activated CDC42 kinase 1	TNK2-pY827	-0.0221512	-0.0654854	0.0835374	0.301897	0.334032	0.135609	0.0727536	0.547568	0.386858
aLPQNDDHyVmQEHR	N-Term(TMT6plex); Y9(Phospho); M11(Oxidation)	TNK2	Activated CDC42 kinase 1	TNK2-pY284	0.0677882	-0.110981	0.0369367	0.457991	0.558916	0.606108	1.42847	1.18027	1.00615
aGSLPNyATINGk	N-Term(TMT6plex); Y7(Phospho); K13(TMT6plex)	TNS1	Tensin-1	TNS1-pY1404	0.0312635	-0.0797699	0.0452818	-0.0538709	0.0421665	0.47586	0.0669392	-0.241084	0.20995
hVAYGGySTPEDR	N-Term(TMT6plex); Y7(Phospho)	TNS1	Tensin-1	TNS1-pY1326	-0.0437561	-0.00267406	0.0450598	1.09035	-0.0349097	0.715888	-0.27314	0.593011	0.0230027
gPLDGSPyAQVQRPPR	N-Term(TMT6plex); Y8(Phospho)	TNS2	Tensin-2	TNS2-pY483	0.0783762	-0.0813379	-0.00145744	0.0835055	-0.25116	0.0573397	0.136673	0.0551068	0.406644
aGVDyAPNLPPFPSPADVk	N-Term(TMT6plex); Y5(Phospho); K19(TMT6plex)	TNS3	Tensin-3	TNS3-pY802	0.015371	0.0945881	-0.1179	0.849726	0.847096	0.874015	1.6224	1.58047	1.66483
eTmTPGyPQDLDIIDGR	N-Term(TMT6plex); M3(Oxidation); Y7(Phospho)	TNS3	Tensin-3	TNS3-pY823	0.151316	-0.306369	0.112024	0.623036	0.563958	0.608263	2.58575	2.15507	2.38205
eSmcSTPAFPVsPETPyVk	N-Term(TMT6plex); M3(Oxidation); C4(Carbamidomethyl); S12(Phospho); Y17(Phospho); K19(TMT6plex)	TNS3	Tensin-3	TNS3-pS850-pY855	-0.0548063	0.0614949	-0.00907448	0.288805	-0.00757892	0.109886	0.792722	0.788095	0.83265
eSmcSTPAFPVSPETPyVk	N-Term(TMT6plex); M3(Oxidation); C4(Carbamidomethyl); Y17(Phospho); K19(TMT6plex)	TNS3	Tensin-3	TNS3-pY855	-0.00854967	0.0185314	-0.0101623	0.164848	0.0818948	-0.0279126	0.879115	0.750529	0.79731
qQQmVVAHQySFAPDGEAR	N-Term(TMT6plex); M4(Oxidation); Y10(Phospho)	TNS3	Tensin-3	TNS3-pY601	-0.100305	0.00513545	0.0889534	0.497709	0.868452	0.786757	1.7825	1.62032	1.66347
kLSLGQyDNDAGGQLPFSk	N-Term(TMT6plex); K1(TMT6plex); Y7(Phospho); K19(TMT6plex)	TNS3	Tensin-3	TNS3-pY780	-0.190209	0.121534	0.0505097	0.456302	0.272948	0.304452	0.415786	0.587447	0.524794
wDsYENLSADGEVLHTQGPVDGSLyAk	N-Term(TMT6plex); S3(Phospho); Y25(Phospho); K27(TMT6plex)	TNS3	Tensin-3	TNS3-pS332-pY354	0.0476345	-0.0596915	0.010009	-0.0115586	-0.0950912	0.00440628	0.110061	0.0644336	0.269124
wDSYENLSADGEVLHTQGPVDGSLyAk	N-Term(TMT6plex); Y25(Phospho); K27(TMT6plex)	TNS3	Tensin-3	TNS3-pY354	0.0343571	0.133287	-0.185884	-0.398456	-0.441459	-0.550186	0.0177815	0.0684624	-0.368122
lSLGQyDNDAGGQLPFSk	N-Term(TMT6plex); Y6(Phospho); K18(TMT6plex)	TNS3	Tensin-3	TNS3-pY780	-0.0186506	-0.0261396	0.0437642	-0.10497	-0.024021	0.0813203	0.316489	0.508368	0.525204
yIEVTSAR	N-Term(TMT6plex); Y1(Phospho)	TNS4	Tensin-4	TNS4-pY150	-0.0208776	0.0457327	-0.0259704	1.82924	1.88191	1.91198	3.1701	3.2203	3.31234
tAGLSDLy	N-Term(TMT6plex); Y8(Phospho)	TSG101	Tumor susceptibility gene 101 protein	TSG101-pY390	-0.0391512	0.157724	-0.134087	0.115566	-0.0823384	0.313473	0.0684987	0.438468	0.847013
sRDPAyELLITGGTYA	N-Term(TMT6plex); Y6(Phospho)	TSPAN3	Tetraspanin-3	TSPAN3-pY243	-0.0461248	-0.230506	0.237722	-0.0370965	0.426121	0.156729	-0.0118197	0.377101	0.33666
sRDPAYELLITGGtYA	N-Term(TMT6plex); T14(Phospho)	TSPAN3	Tetraspanin-3	TSPAN3-pT251	-0.179963	0.115995	0.0476108	-0.073582	0.0342469	-0.0257924	0.137499	0.662946	0.706137
sRDPAYELLITGGTyA	N-Term(TMT6plex); Y15(Phospho)	TSPAN3	Tetraspanin-3	TSPAN3-pY252	-0.0833945	0.127592	-0.0533481	0.723235	0.4757	0.190809	0.0596836	0.176379	0.487179
aITNNQyEIV	N-Term(TMT6plex); Y7(Phospho)	TSPAN6	Tetraspanin-6	TSPAN6-pY242	0.021603	-0.19572	0.152867	0.22318	0.425653	0.337718	0.46851	0.557004	0.552883
qAHDSLyR	N-Term(TMT6plex); Y7(Phospho)	TTYH3	Protein tweety homolog 3	TTYH3-pY439	0.205547	0.014258	-0.256796	-0.117306	0.215298	-0.182083	-0.168715	-0.406661	-0.265056
iySAER	N-Term(TMT6plex); Y2(Phospho)	TXNRD1	Thioredoxin reductase 1, cytoplasmic	TXNRD1-pY302	0.00973331	0.0701935	-0.0840996	0.369099	0.148913	0.0980742	-0.140999	-0.378869	-0.31412
sYDyDLIIIGGGSGGLAAAk	N-Term(TMT6plex); Y4(Phospho); K20(TMT6plex)	TXNRD1	Thioredoxin reductase 1, cytoplasmic	TXNRD1-pY163	-0.149813	0.161322	-0.0286734	0.0634762	-0.0496747	-0.193192	0.0896552	0.0136475	0.61304
vVYENAyGQFIGPHR	N-Term(TMT6plex); Y7(Phospho)	TXNRD1	Thioredoxin reductase 1, cytoplasmic	TXNRD1-pY281	0.0301815	0.129801	-0.176712	-0.467501	-0.861204	-0.33887	-0.409798	-0.400595	-0.531906
lLAQAEGEPcyIR	N-Term(TMT6plex); C10(Carbamidomethyl); Y11(Phospho)	TYK2	Non-receptor tyrosine-protein kinase TYK2	TYK2-pY292	0.135288	-0.122171	-0.0249076	-0.132337	0.200771	0.0954746	0.172168	0.117451	-0.195179
dGSLASNPySGDLTk	N-Term(TMT6plex); Y9(Phospho); K15(TMT6plex)	UBAP2L	Ubiquitin-associated protein 2-like	UBAP2L-pY858	0.159329	0.0204501	-0.202645	-0.0806266	0.269399	0.415049	0.724976	0.606854	0.836615
eSSSIyISk	N-Term(TMT6plex); Y6(Phospho); K9(TMT6plex)	UGDH	UDP-glucose 6-dehydrogenase	UGDH-pY352	0.0925878	-0.0297627	-0.0677309	-0.1065	0.0850262	-0.00752584	0.0938546	0.299531	0.261359
vQIyHNPTANSFR	N-Term(TMT6plex); Y4(Phospho)	VASP	Vasodilator-stimulated phosphoprotein	VASP-pY39	-0.210449	0.240459	-0.0673899	-0.196084	0.146615	0.0968033	0.134247	-0.0453069	0.119349
nPGNQAAyEHFETmk	N-Term(TMT6plex); Y8(Phospho); M14(Oxidation); K15(TMT6plex)	VCL	Vinculin	VCL-pY692	0.13375	-0.106834	-0.0376596	-0.398167	-0.47954	-0.522676	-0.094248	-0.289831	-0.272596
sFLDSGyR	N-Term(TMT6plex); Y7(Phospho)	VCL	Vinculin	VCL-pY822	-0.111278	0.0808811	0.0237073	-0.603941	-0.0027913	-0.0593375	-0.436177	0.0497089	0.0451838
sLyASSPGGVYATR	N-Term(TMT6plex); Y3(Phospho)	VIM	Vimentin	VIM-pY53	0.233689	-0.280138	0.000937362	-0.00506854	0.157633	-0.058235	0.355402	0.504035	0.532326
fANyIDk	N-Term(TMT6plex); Y4(Phospho); K7(TMT6plex)	VIM	Vimentin	VIM-pY117	0.0796542	-0.00731283	-0.0765977	-0.155262	-0.104709	-0.0496396	-0.159373	-0.0580981	-0.00388511
sLYASSPGGVyATR	N-Term(TMT6plex); Y11(Phospho)	VIM	Vimentin	VIM-pY61	0.0847469	-0.157601	0.0607164	0.0220707	0.185855	-0.06891	0.128044	0.258068	0.2488
vIyDFIEk	N-Term(TMT6plex); Y3(Phospho); K8(TMT6plex)	WASL	Neural Wiskott-Aldrich syndrome protein	WASL-pY256	0.0709218	0.0583073	-0.13865	-0.548351	-0.557106	-0.533902	-0.496265	-0.40681	-0.277086
tGPSGQSLAPPPPPyR	N-Term(TMT6plex); Y15(Phospho)	WIPF2	WAS/WASL-interacting protein family member 2	WIPF2-pY255	-0.164289	-0.00504426	0.152018	0.0382196	0.212037	0.624865	0.609634	0.350647	0.407593
gSSGGyGSGGAALQPk	N-Term(TMT6plex); Y6(Phospho); K16(TMT6plex)	WIPF2	WAS/WASL-interacting protein family member 2	WIPF2-pY74	0.0207899	-0.0042553	-0.0167887	2.89915	3.07656	2.9024	3.57281	3.31424	3.35913
dAPPPPPPyR	N-Term(TMT6plex); Y9(Phospho)	WIPF2	WAS/WASL-interacting protein family member 2	WIPF2-pY346	0.202237	-0.478415	0.178559	2.33466	2.45863	2.35889	2.65692	2.64846	2.45949
nYQQNYQNsESGEkNEGSESAPEGQAQQR	N-Term(TMT6plex); S9(Phospho); K14(TMT6plex)	YBX1	Y-box-binding protein 1	YBX1-pS165	-0.0602857	0.304575	-0.31138	-0.380927	0.505738	0.124729	0.102464	0.2956	0.148797
kGTGLLSSDyR	N-Term(TMT6plex); K1(TMT6plex); Y10(Phospho)	ZC3HAV1	Zinc finger CCCH-type antiviral protein 1	ZC3HAV1-pY410	0.240617	-0.00142762	-0.2872	2.6025	2.54018	2.6537	3.06967	3.20228	3.29518
gTGLLSSDyR	N-Term(TMT6plex); Y9(Phospho)	ZC3HAV1	Zinc finger CCCH-type antiviral protein 1	ZC3HAV1-pY410	0.396063	-0.457317	-0.0652977	2.34038	2.00988	1.76802	2.4122	2.80798	2.58597

## Sheet: Table 5.3
Table 5.3: Targets for PRM analysis
Modified amino acids are indicated by a lowercase letter in "Annotated Sequence"
Annotated Sequence	Gene	Protein	Gene-site #	Charge	m/z
yVLcPSTTPSPAQPADR	AXL	Tyrosine-protein kinase receptor UFO	AXL-pY866	2	970.435
IGEGtyGVVYk	CDK2; CDK1; CDK3	Cyclin-dependent kinase 2; Cyclin-dependent kinase 1; Cyclin-dependent kinase 3	CDK2-pT14-pY15; CDK1-pT14-pY15; CDK3-pT14-pY15	2	673.277
QEEAEyVR	CRK	Adapter molecule crk	CRK-pY136	2	552.224
SLDNNySTPNER	CTNND1	Catenin delta-1	CTNND1-pY904	2	745.301
NASTFEDVTQVSSAyQk	CTTN	Src substrate cortactin	CTTN-pY334	2	977.925
GSTAENAEyLR	EGFR	Epidermal growth factor receptor	EGFR-pY1197	2	645.772
SSGSGSSVADERVDyVVVDQQk	GAB1	GRB2-associated-binding protein 1	GAB1-pY659	3	798.027
VDyVVVDQQk	GAB1	GRB2-associated-binding protein 1	GAB1-pY659	2	636.797
LIEDNEyTAR	LCK; YES1; FYN; SRC	Tyrosine-protein kinase Lck; Tyrosine-protein kinase Yes; Tyrosine-protein kinase Fyn; Proto-oncogene tyrosine-protein kinase Src	LCK-pY394; YES1-pY426; FYN-pY420; SRC-pY419	2	652.282
VIEDNEyTAR	LYN; HCK	Tyrosine-protein kinase Lyn; Tyrosine-protein kinase HCK	LYN-pY397; HCK-pY411	2	645.274
VADPDHDHTGFLTEyVATR	MAPK1	Mitogen-activated protein kinase 1	MAPK1-pY187	3	768.651
vADPDHDHTGFLtEyVATR	MAPK1	Mitogen-activated protein kinase 1	MAPK1-pT185-pY187	3	741.995
IADPEHDHTGFLtEyVATR	MAPK3	Mitogen-activated protein kinase 3	MAPK3-pT202-pY204	3	777.994
IADPEHDHTGFLTEyVATR	MAPK3	Mitogen-activated protein kinase 3	MAPK3-pY204	3	751.339
EYDQLyEEYTR	PIK3R2	Phosphatidylinositol 3-kinase regulatory subunit beta	PIK3R2-pY464	2	794.814
IGTAEPDyGALYEGR	PLCG1	1-phosphatidylinositol 4,5-bisphosphate phosphodiesterase gamma-1	PLCG1-pY771	2	846.369
GHEyTNIk	PTPN11	Tyrosine-protein phosphatase non-receptor type 11	PTPN11-pY546	2	521.224
FIHQQPQSSSPVyGSSAk	PXN	Paxillin	PXN-pY88	2	1014.46
VTIADDySDPFDAk	SHB	SH2 domain-containing adapter protein B	SHB-pY246	2	818.843
ySISDR	SOS1	Son of sevenless homolog 1	SOS1-pY1196	2	410.665
WDSYENLSADGEVLHTQGPVDGSLyAk	TNS3	Tensin-3	TNS3-pY354	3	1011.12
SLYASSPGGVyATR	VIM	Vimentin	VIM-pY61	2	754.843

## Sheet: Table 5.4
Table 5.4: PRM experiment of A549 cells situlated with 0, 0.5, or 2 mins EGF
Data is presented as Log2 fold change of each condition normlalized to 0 min average intensity
X indicates target was not detected
				Integrated MS1 peak area of precursor mass									Log2(fold change)
Sequence	GN	Protein	Modifications	0m R1	0m R2	0m R3	0.5m R1	0.5m R2	0.5m R3	2m R1	2m R2	2m R3	0m R1	0m R2	0m R3	0.5m R1	0.5m R2	0.5m R3	2m R1	2m R2	2m R3
YVLCPSTTPSPAQPADR	AXL	Tyrosine-protein kinase receptor UFO	1xCarbamidomethyl [C4]; 1xPhospho [Y1]	787434	777994	774554	1.0853e+06	1.21352e+06	640469	911251	1.01053e+06	695584	0.0136967	-0.00370462	-0.0100974	0.476564	0.637661	-0.284334	0.224386	0.373576	-0.165239
IGEGTYGVVYK	CDK2; CDK1; CDK3	Cyclin-dependent kinase 2; Cyclin-dependent kinase 1; Cyclin-dependent kinase 3	2xPhospho [T5; Y]	1.93233e+06	973590	909656	3.91235e+06	4.27665e+06	1.64036e+06	4.04176e+06	1.85664e+06	2.32087e+06	0.603403	-0.385552	-0.483545	1.6211	1.74954	0.367074	1.66804	0.545759	0.867729
QEEAEYVR	CRK	Adapter molecule crk	1xPhospho [Y6]		324661	205033	1.6164e+06	1526458	641886	5.1167e+06	1.37438e+06	994664	#NUM!	0.293774	-0.369301	2.60955	2.52696	1.27716	4.27198	2.37555	1.90905
SLDNNYSTPNER	CTNND1	Catenin delta-1	1xPhospho [S/Y]	86450.2	76239.5	66324.8	290553	337680	156623	531770	225195	191799	0.179465	-0.00186588	-0.202856	1.92832	2.14518	1.03682	2.80033	1.5607	1.32912
NASTFEDVTQVSSAYQK	CTTN	Src substrate cortactin	1xPhospho [Y15]	129452	98805	75327.6	313957	241682	127793	404530	283146	194287	0.355282	-0.0344812	-0.425887	1.63343	1.25597	0.336668	1.99911	1.48441	0.941052
GSTAENAEYLR	EGFR	Epidermal growth factor receptor	1xPhospho [Y9]	2.16785e+06	1.46771e+06	1.1383e+06	4.53476e+07	4.75699e+07	2.37976e+07	60994232	1.86101e+07	2.60529e+07	0.446072	-0.116631	-0.48331	4.83276	4.90178	3.90255	5.26041	3.54782	4.03318
VDYVVVDQQK	GAB1	GRB2-associated-binding protein 1	1xPhospho [Y3]	865885	676826	430130	8.46876e+06	9.91081e+06	4.90196e+06	1.80176e+07	1.26051e+07	8817206	0.396936	0.0415438	-0.612467	3.68684	3.91369	2.89805	4.77603	4.26062	3.74501
SSGSGSSVADERVDYVVVDQQK	GAB1	GRB2-associated-binding protein 1	1xPhospho [Y15]	282367	161011	125156	4508642	3.05083e+06	1.51061e+06	3228485	3.26748e+06	2.04919e+06	0.575286	-0.235124	-0.598554	4.57234	4.00885	2.99478	4.0905	4.10782	3.4347
LIEDNEYTAR	LCK; YES1; FYN; SRC	Tyrosine-protein kinase Lck; Tyrosine-protein kinase Yes; Tyrosine-protein kinase Fyn; Proto-oncogene tyrosine-protein kinase Src	1xPhospho [T/Y]	3.29873e+06	2.78745e+06	2.01533e+06	3.50135e+06	3670875	1.91616e+06	2.52169e+06	1.42006e+06	1.37754e+06	0.288681	0.0457182	-0.422211	0.374682	0.442897	-0.495008	-0.0988347	-0.927275	-0.97113
VIEDNEYTAR	LYN; HCK	Tyrosine-protein kinase Lyn; Tyrosine-protein kinase HCK	1xPhospho [T/Y]	517967	625988	369723	570528	748886	509986	672612	314127	219013	0.0378364	0.31111	-0.448578	0.177274	0.569722	0.0154334	0.41475	-0.683678	-1.20401
VADPDHDHTGFLTEYVATR	MAPK1	Mitogen-activated protein kinase 1	1xPhospho [T/Y]	3.85285e+08	3.26123e+08	2.20828e+08	4.2867e+08	3.7609e+08	2.0151e+08	9.71992e+08	7.80042e+08	5.94732e+08	0.310193	0.0696839	-0.492811	0.464136	0.275344	-0.624881	1.64521	1.32782	0.936509
VADPDHDHTGFLTEYVATR	MAPK1	Mitogen-activated protein kinase 1	2xPhospho [T13; Y15]	1.33687e+07	1.79794e+07	5.46337e+06	1.91674e+07	2.57031e+07	7.68435e+06	1.10703e+08	2.68659e+07	3.81105e+07	0.123669	0.551149	-1.16733	0.643464	1.06675	-0.675196	3.17343	1.13058	1.635
IADPEHDHTGFLTEYVATR	MAPK3	Mitogen-activated protein kinase 3	1xPhospho [T/Y]	1.25852e+08	1.02144e+08	7.52024e+07	1.34429e+08	1.32332e+08	5.39342e+07	3.41093e+08	2.89713e+08	1.89329e+08	0.316431	0.0153013	-0.426448	0.411547	0.388861	-0.906026	1.75487	1.51933	0.905597
IADPEHDHTGFLTEYVATR	MAPK3	Mitogen-activated protein kinase 3	2xPhospho [T13; Y15]	5.20011e+06	5083529	2.14677e+06	8.03469e+06	9.16693e+06	3.13689e+06	3.35128e+07	1.0141e+07	1.39417e+07	0.327703	0.294992	-0.948674	0.955404	1.1456	-0.401505	3.0158	1.29129	1.7505
EYDQLYEEYTR	PIK3R2	Phosphatidylinositol 3-kinase regulatory subunit beta	1xPhospho [T/Y]	682450	703741	586625	724689	1.08881e+06	468544	1.14112e+06	509266	566470	0.0535017	0.0978216	-0.164783	0.14014	0.727458	-0.489038	0.795157	-0.368803	-0.215224
IGTAEPDYGALYEGR	PLCG1	1-phosphatidylinositol 4,5-bisphosphate phosphodiesterase gamma-1	1xPhospho [Y]		35005.3		719469	1.03137e+06	384668	1.86831e+06	1.46717e+06	1.01341e+06	X	X	X	4.36129	4.88085	3.45797	5.73802	5.38932	4.85549
GHEYTNIK	PTPN11	Tyrosine-protein phosphatase non-receptor type 11	1xPhospho [Y4]	1.30228e+06	1.04296e+06	393618	1.47135e+06	1.45887e+06	726621	3.38033e+06	1.49338e+06	1.11023e+06	0.512424	0.192076	-1.21374	0.688525	0.676238	-0.329335	1.88855	0.709973	0.282254
FIHQQPQSSSPVYGSSAK	PXN	Paxillin	1xPhospho [S/Y]	5.259e+06	4.32472e+06	4.17564e+06	5.44204e+06	5.61435e+06	2.86232e+06	4.66888e+06	3516237	2.83896e+06	0.197409	-0.0847717	-0.135382	0.246768	0.291739	-0.680193	0.025698	-0.383348	-0.692018
VTIADDYSDPFDAK	SHB	SH2 domain-containing adapter protein B	1xPhospho [S/Y]	2.72664e+06	2.10658e+06	1.36393e+06	3.57553e+06	3871357	1.99932e+06	4.49314e+06	3.15024e+06	2.50663e+06	0.400482	0.0282586	-0.59887	0.791515	0.906197	-0.0471331	1.12108	0.608818	0.279109
YSISDR	SOS1	Son of sevenless homolog 1	1xPhospho [Y1]	33302.9			990785	650370	457690	953732	228351	308292	X	X	X	4.89485	4.28754	3.78065	4.83986	2.77753	3.21058
WDSYENLSADGEVLHTQGPVDGSLYAK	TNS3	Tensin-3	1xPhospho [S/T/Y]	1.01524e+06	1.00706e+06	453516	756987	3.59303e+06	156626	4.47669e+06	567497	422094	0.29888	0.287209	-0.863721	-0.124606	2.12225	-2.39755	2.43949	-0.540261	-0.967309
SLYASSPGGVYATR	VIM	Vimentin	1xPhospho [S/T/Y]	1.9966e+06	1.60174e+06	933675	1.59482e+06	3.99669e+06	747399	5.38011e+06	1.85439e+06	1.36915e+06	0.402357	0.0844473	-0.694198	0.0782016	1.40362	-1.01524	1.83245	0.295752	-0.141911

## Sheet: Table 5.5
Table 5.5: SureQuant pTyr L/H ratios for analysis of A549 cells stimulated for 0, 0.5, or 2 mins with EGF.
Sample name: Xm denotes duration of EGF stimulation in minutes, RX denotes replicate number
				L/H ratios
Modified Sequence	Gene	Source Protein	Site #	0m R1	0m R2	0m R3	0.5m R1	0.5m R2	0.5m R3	2m R1	2m R2	2m R3		Modifications key
ADY[+80]DTLSLR	PKP3	Plakophilin-3 OS=Homo sapiens OX=9606 GN=PKP3 PE=1 SV=1	pY176	0.00126436	0.00339896	0.00288648	0.00117881	0.00400007	0.00219456	0.0010981	0.0032299	0.00217111		Y[+80] = Tyrosine phosphorylation
AGSLPNY[+80]ATINGK	TNS1	Tensin-1 OS=Homo sapiens OX=9606 GN=TNS1 PE=1 SV=2	pY1404	0.000107624	0.0001123	0.00011296	0.000117652	0.000115629	0.000114576	0.000121532	0.000104209	0.000124962		T[+80] = Threonine phosphorylation
ALDY[+80]YMLR	TLN1	Talin-1 OS=Homo sapiens OX=9606 GN=TLN1 PE=1 SV=3	pY70	0.00614119	0.00502815	0.00531269	0.00593227	0.00587764	0.00500822	0.0059928	0.00463194	0.00513405		S[+80] = Serine phosphorylation
ALPQNDDHY[+80]VMQEHR	TNK2	Activated CDC42 kinase 1 OS=Homo sapiens OX=9606 GN=TNK2 PE=1 SV=3	pY284	0.0020055	0.00368233	0.0031886	0.00188657	0.00498651	0.00247654	0.0015665	0.00387929	0.00225178		C[+57] = Carboxyamidomethylcysteine
AQY[+80]EDIANR	KRT75	Keratin, type II cytoskeletal 75 OS=Homo sapiens OX=9606 GN=KRT75 PE=1 SV=2; Keratin, type II cytoskeletal 8 OS=Homo sapiens OX=9606 GN=KRT8 PE=1 SV=7	pY327	0.000563686	0.000606899	0.000572931	0.000486911	0.000558897	0.000573302	0.000477284	0.000564605	0.000520455
AY[+80]TNFDAER	ANXA2P2	Putative annexin A2-like protein OS=Homo sapiens OX=9606 GN=ANXA2P2 PE=5 SV=2; Annexin A2 OS=Homo sapiens OX=9606 GN=ANXA2 PE=1 SV=2	pY30	0.0030204	0.00540394	0.00587084	0.00295495	0.00337642	0.00332383	0.00191999	0.00288074	0.00267765
AY[+80]TNFDAERDALNIETAIK	ANXA2P2	Putative annexin A2-like protein OS=Homo sapiens OX=9606 GN=ANXA2P2 PE=5 SV=2; Annexin A2 OS=Homo sapiens OX=9606 GN=ANXA2 PE=1 SV=2	pY30	0.00164752	0.00373054	0.00133732	0.00167537	0.00146931	0.00219504	0.000592514	0.000685313	0.000726807
DASSQDC[+57]Y[+80]DIPR	GAB1	GRB2-associated-binding protein 1 OS=Homo sapiens OX=9606 GN=GAB1 PE=1 SV=2	pY406	0.00031062	0.00231702	0.00261672	0.000296399	0.00222897	0.00297238	0.000293131	0.00207195	0.00296277
DDGMEEVVGHTQGPLDGSLY[+80]AK	TNS1	Tensin-1 OS=Homo sapiens OX=9606 GN=TNS1 PE=1 SV=2	pY366	0.00142032	0.00124899	0.00102131	0.00196188	0.00158943	0.00129569	0.00148965	0.00156368	0.00118035
DGHPLSPERDHLEGLY[+80]AK	PARD3B	Partitioning defective 3 homolog B OS=Homo sapiens OX=9606 GN=PARD3B PE=1 SV=2	pY1000	0.000208431	0.000198872	0.000207702	0.000223967	0.000214163	0.000216228	0.000186027	0.000211324	0.000229748
DHLEGLY[+80]AK	PARD3B	Partitioning defective 3 homolog B OS=Homo sapiens OX=9606 GN=PARD3B PE=1 SV=2	pY1000	0.000373726	0.000346375	0.000371352	0.000399125	0.000317887	0.000424965	0.000373917	0.000336961	0.000367517
DLEY[+80]LDLK	PLEKHA7	Pleckstrin homology domain-containing family A member 7 OS=Homo sapiens OX=9606 GN=PLEKHA7 PE=1 SV=2	pY665	0.000408525	0.00059997	0.000569978	0.000403336	0.000664087	0.00057957	0.000377142	0.000693893	0.0005672
DPHYQDPHSTAVGNPEY[+80]LNTVQPTC[+57]VNSTFDSPAHWAQK	EGFR	Epidermal growth factor receptor OS=Homo sapiens OX=9606 GN=EGFR PE=1 SV=2	pY1138	0.00458008	0.0186031	0.0157081	0.00448052	0.0226099	0.0174323	0.00520568	0.0181596	0.0183685
DQY[+80]LMWLTQK	PIK3R1	Phosphatidylinositol 3-kinase regulatory subunit alpha OS=Homo sapiens OX=9606 GN=PIK3R1 PE=1 SV=2	pY580	0.000445343	0.000488158	0.000395504	0.000452166	0.000477164	0.000456864	0.000424048	0.000443717	0.000392839
DSSTSPGDY[+80]VLSVSENSR	CRK	Adapter molecule crk OS=Homo sapiens OX=9606 GN=CRK PE=1 SV=2	pY47	0.000465429	0.000442845	0.000442637	0.000441309	0.000464738	0.000521585	0.000430029	0.000468949	0.000527416
DSTY[+80]DLPR	GAB2	GRB2-associated-binding protein 2 OS=Homo sapiens OX=9606 GN=GAB2 PE=1 SV=1	pY266	0.00162042	0.00226362	0.00227486	0.00143177	0.00223572	0.00227365	0.00136848	0.00187842	0.00215056
DVTIGGSAPIY[+80]VK	PARD3	Partitioning defective 3 homolog OS=Homo sapiens OX=9606 GN=PARD3 PE=1 SV=2	pY489	0.00368483	0.00291289	0.00303469	0.00309173	0.0032552	0.00299594	0.002965	0.00271104	0.00308746
DY[+80]HFVTSR	DLG1	Disks large homolog 1 OS=Homo sapiens OX=9606 GN=DLG1 PE=1 SV=2	pY760	0.000490959	0.000489409	0.000539899	0.000452747	0.000525488	0.000566465	0.000488164	0.000506363	0.000530732
EAAY[+80]HPEVAPDVR	TLN1	Talin-1 OS=Homo sapiens OX=9606 GN=TLN1 PE=1 SV=3	pY2224	0.000132517	0.00012081	0.000115934	0.000134263	0.00011549	0.000134526	0.000142799	0.000139166	0.00011619
EATQPEPIY[+80]AESTK	PRAG1	Inactive tyrosine-protein kinase PRAG1 OS=Homo sapiens OX=9606 GN=PRAG1 PE=1 SV=4	pY413	0.0104289	0.010551	0.010396	0.0101697	0.0120684	0.00981401	0.00966981	0.0103369	0.00956366
EC[+57]DY[+80]SIDGINR	TLN2	Talin-2 OS=Homo sapiens OX=9606 GN=TLN2 PE=1 SV=4	pY1665	0.000686391	0.000716194	0.000696807	0.000703184	0.000853364	0.000758732	0.0006958	0.000853828	0.000677614
EEPEALY[+80]AAVNK	ITSN2	Intersectin-2 OS=Homo sapiens OX=9606 GN=ITSN2 PE=1 SV=3	pY968	0.000358345	0.000693019	0.000563324	0.000363872	0.000893502	0.000584129	0.000327632	0.000776615	0.00048634
EEY[+80]DVLDK	CD247	T-cell surface glycoprotein CD3 zeta chain OS=Homo sapiens OX=9606 GN=CD247 PE=1 SV=2	pY83	0.000148121	0.000144358	0.000143252	0.000153106	0.000144426	0.000142542	0.000159521	0.000140858	0.000142775
EIDVSY[+80]VK	EPHB4	Ephrin type-B receptor 4 OS=Homo sapiens OX=9606 GN=EPHB4 PE=1 SV=2	pY614	0.000386087	0.000396333	0.000388911	0.000405861	0.000397239	0.000384364	0.000425975	0.000404234	0.000414972
EIENLTQQY[+80]EEK	MYH11	Myosin-11 OS=Homo sapiens OX=9606 GN=MYH11 PE=1 SV=3	pY1408	0.00236455	0.00214626	0.00231489	0.00206317	0.00261147	0.00209532	0.00157551	0.00198522	0.00195873
EKPAQDPLY[+80]DVPNASGGQAGGPQRPGR	RIN1	Ras and Rab interactor 1 OS=Homo sapiens OX=9606 GN=RIN1 PE=1 SV=4	pY36	0.0135706	0.0156025	0.0162588	0.0135935	0.0182866	0.0155329	0.0124572	0.0152031	0.0160116
EQY[+80]DVPQEWR	MUC12	Mucin-12 OS=Homo sapiens OX=9606 GN=MUC12 PE=1 SV=2	pY5413	0.000672393	0.000513325	0.000589248	0.000642216	0.00057996	0.000563409	0.000557029	0.000685076	0.000791083
ERDY[+80]AEIQDFHR	PARD3	Partitioning defective 3 homolog OS=Homo sapiens OX=9606 GN=PARD3 PE=1 SV=2	pY1080	0.00255457	0.00284424	0.00289101	0.00223714	0.00302778	0.00283847	0.0019247	0.00241729	0.00267776
ESMC[+57]STPAFPVSPETPY[+80]VK	TNS3	Tensin-3 OS=Homo sapiens OX=9606 GN=TNS3 PE=1 SV=2	pY855	0.0196123	0.0281793	0.0469239	0.0250235	0.043306	0.0275585	0.0225048	0.0320915	0.0218275
EVPIY[+80]ANR	ADAM9	Disintegrin and metalloproteinase domain-containing protein 9 OS=Homo sapiens OX=9606 GN=ADAM9 PE=1 SV=1	pY769	0.00231202	0.00253941	0.00235538	0.00230617	0.00278245	0.00238862	0.0022275	0.00242665	0.00228643
EYDRLY[+80]EEYTR	PIK3R1	Phosphatidylinositol 3-kinase regulatory subunit alpha OS=Homo sapiens OX=9606 GN=PIK3R1 PE=1 SV=2; Phosphatidylinositol 3-kinase regulatory subunit gamma OS=Homo sapiens OX=9606 GN=PIK3R3 PE=1 SV=2	pY467	0.000255513	0.000242528	0.000355564	0.000284431	0.000339763	0.000269223	0.000254276	0.00025291	0.000255012
FANY[+80]IDK	VIM	Vimentin OS=Homo sapiens OX=9606 GN=VIM PE=1 SV=4	pY117	0.000489819	0.000448205	0.000465032	0.000518544	0.000499637	0.000456395	0.000465746	0.000476722	0.00046309
FANY[+80]IEK	DES	Desmin OS=Homo sapiens OX=9606 GN=DES PE=1 SV=3	pY122	0.000254779	0.000262163	0.000252625	0.000284745	0.000249864	0.000254345	0.000284854	0.000250676	0.000256232
FASEASGY[+80]QDNIAR	DES	Desmin OS=Homo sapiens OX=9606 GN=DES PE=1 SV=3	pY363	8.61688e-05	7.97774e-05	7.80479e-05	8.21917e-05	7.64608e-05	8.72298e-05	6.49699e-05	7.3673e-05	8.82386e-05
FAVPTY[+80]AAK	ADAM9	Disintegrin and metalloproteinase domain-containing protein 9 OS=Homo sapiens OX=9606 GN=ADAM9 PE=1 SV=1	pY778	0.00426844	0.00429444	0.00433288	0.00428246	0.00478524	0.0040216	0.00333432	0.00457896	0.00436167
FEEPAPLSY[+80]DSRPR	TJP1	Tight junction protein ZO-1 OS=Homo sapiens OX=9606 GN=TJP1 PE=1 SV=3	pY1140	6.97242e-05	8.39477e-05	8.24913e-05	7.47042e-05	8.42804e-05	7.68401e-05	6.32375e-05	8.50995e-05	7.95763e-05
FHPEPY[+80]GLEDDQR	CTNND1	Catenin delta-1 OS=Homo sapiens OX=9606 GN=CTNND1 PE=1 SV=1	pY280	0.000272011	0.00104706	0.000946308	0.000257325	0.00119573	0.000831011	0.000279475	0.00111845	0.000798476
FIHQQPQSSSPVY[+80]GSSAK	PXN	Paxillin OS=Homo sapiens OX=9606 GN=PXN PE=1 SV=3	pY88	0.166604	0.127136	0.173726	0.178841	0.150731	0.152716	0.171039	0.188529	0.135269
FQKEIENLTQQY[+80]EEK	MYH11	Myosin-11 OS=Homo sapiens OX=9606 GN=MYH11 PE=1 SV=3	pY1408	0.000382947	0.000401116	0.000393262	0.00031279	0.000301108	0.000313571	0.000317378	0.000396404	0.00033419
GAY[+80]SLSIR	YES1	Tyrosine-protein kinase Yes OS=Homo sapiens OX=9606 GN=YES1 PE=1 SV=3; Tyrosine-protein kinase Fyn OS=Homo sapiens OX=9606 GN=FYN PE=1 SV=3; Tyrosine-protein kinase Fgr OS=Homo sapiens OX=9606 GN=FGR PE=1 SV=2	pY194	0.00154827	0.00153715	0.00155904	0.00138437	0.001578	0.00151705	0.0013808	0.00139322	0.00145308
GDY[+80]PLEAVR	PKM	Pyruvate kinase PKM OS=Homo sapiens OX=9606 GN=PKM PE=1 SV=4	pY370	0.00187364	0.00178004	0.00182696	0.00164883	0.00170097	0.00159681	0.00139602	0.0018762	0.00179593
GEPNVSY[+80]IC[+57]SR	GSK3A	Glycogen synthase kinase-3 alpha OS=Homo sapiens OX=9606 GN=GSK3A PE=1 SV=2; Glycogen synthase kinase-3 beta OS=Homo sapiens OX=9606 GN=GSK3B PE=1 SV=2	pY279	1.48864	1.35822	1.36595	1.47959	1.53562	1.34467	1.34402	1.41801	1.33176
GHEY[+80]TNIK	PTPN11	Tyrosine-protein phosphatase non-receptor type 11 OS=Homo sapiens OX=9606 GN=PTPN11 PE=1 SV=2	pY546	0.00165546	0.00340967	0.00294787	0.00176902	0.00253632	0.00210619	0.00147407	0.0026692	0.00205286
GIVVY[+80]TGDR	ATP1A1	Sodium/potassium-transporting ATPase subunit alpha-1 OS=Homo sapiens OX=9606 GN=ATP1A1 PE=1 SV=1	pY260	0.00130843	0.00192735	0.00188621	0.00161467	0.0022273	0.00187289	0.00144665	0.00231385	0.00186999
GPAVGIY[+80]NDNINTEMPR	CDCP1	CUB domain-containing protein 1 OS=Homo sapiens OX=9606 GN=CDCP1 PE=1 SV=3	pY707	0.000362208	0.000183953	0.000301761	0.000286005	0.000195702	0.00017731	0.00027875	0.000247846	0.000240944
GQEATDTEY[+80]SEIK	SIGLEC9	Sialic acid-binding Ig-like lectin 9 OS=Homo sapiens OX=9606 GN=SIGLEC9 PE=1 SV=2	pY456	0.000201403	0.00020228	0.00020358	0.000199307	0.000231507	0.000206609	0.000225303	0.000199199	0.000219633
GSTAENAEY[+80]LR	EGFR	Epidermal growth factor receptor OS=Homo sapiens OX=9606 GN=EGFR PE=1 SV=2	pY1197	0.00108785	0.0246412	0.0240031	0.00108368	0.0274406	0.0239132	0.00080278	0.0231369	0.0225314
GY[+80]FFLDER	PDLIM4	PDZ and LIM domain protein 4 OS=Homo sapiens OX=9606 GN=PDLIM4 PE=1 SV=2	pY293	0.000896148	0.000861773	0.000871572	0.000853417	0.000882515	0.000914185	0.000955236	0.000901199	0.000898515
HADAEMT[+80]GY[+80]VVTR	MAPK13	Mitogen-activated protein kinase 13 OS=Homo sapiens OX=9606 GN=MAPK13 PE=1 SV=1	pT180;pY182	0.0140203	0.000534641	0.000697272	0.000386112	0.000534072	0.000597842	0.00169862	0.00125964	0.0149729
HELQANC[+57]Y[+80]EEVKDR	CFL1	Cofilin-1 OS=Homo sapiens OX=9606 GN=CFL1 PE=1 SV=3	pY140	0.00598641	0.00606554	0.0066796	0.00552194	0.00725949	0.00621548	0.00475891	0.00641289	0.00576713
HPAGVY[+80]QVSGLHNK	TNS1	Tensin-1 OS=Homo sapiens OX=9606 GN=TNS1 PE=1 SV=2	pY1254	0.0001517	0.000143869	0.000143273	0.000153399	0.0001569	0.000152508	0.000149285	0.000138005	0.000151772
HPDIY[+80]AVPIK	TJP2	Tight junction protein ZO-2 OS=Homo sapiens OX=9606 GN=TJP2 PE=1 SV=2	pY1118	0.000278299	0.00033205	0.000366056	0.00027905	0.000341889	0.000371771	0.000242187	0.000254347	0.000329052
HYEDGYPGGSDNY[+80]GSLSR	CTNND1	Catenin delta-1 OS=Homo sapiens OX=9606 GN=CTNND1 PE=1 SV=1	pY228	0.000360445	0.000425079	0.000507628	0.000384063	0.00075009	0.000488049	0.000222487	0.000614325	0.00054847
IADPEHDHTGFLT[+80]EY[+80]VATR	MAPK3	Mitogen-activated protein kinase 3 OS=Homo sapiens OX=9606 GN=MAPK3 PE=1 SV=4	pT202;pY204	0.00108447	0.00393727	0.00233814	0.000975654	0.00419905	0.00108799	0.00107446	0.00366045	0.00109594
IAIY[+80]ELLFK	RPS10	40S ribosomal protein S10 OS=Homo sapiens OX=9606 GN=RPS10 PE=1 SV=1	pY12	0.00040429	0.000390099	0.000404344	0.000362565	0.000439448	0.000380558	0.000379158	0.000373311	0.000448857
IEGVY[+80]AR	RPL35A	60S ribosomal protein L35a OS=Homo sapiens OX=9606 GN=RPL35A PE=1 SV=2	pY34	0.00244307	0.00219685	0.00223941	0.00251795	0.00276518	0.00218396	0.00239437	0.00229982	0.00236037
IGEGTY[+80]GVVYK	CDK2	Cyclin-dependent kinase 2 OS=Homo sapiens OX=9606 GN=CDK2 PE=1 SV=2; Cyclin-dependent kinase 1 OS=Homo sapiens OX=9606 GN=CDK1 PE=1 SV=3; Cyclin-dependent kinase 3 OS=Homo sapiens OX=9606 GN=CDK3 PE=1 SV=1	pY15	0.280774	0.289023	0.31059	0.295964	0.346173	0.281593	0.264956	0.303847	0.293924
IIQLLDDY[+80]PK	RPLP0	60S acidic ribosomal protein P0 OS=Homo sapiens OX=9606 GN=RPLP0 PE=1 SV=1; 60S acidic ribosomal protein P0-like OS=Homo sapiens OX=9606 GN=RPLP0P6 PE=5 SV=1	pY24	0.00202319	0.00206533	0.00199873	0.00204798	0.00217011	0.00200402	0.00191274	0.0769172	0.0018549
IYIDPFTY[+80]EDPNEAVR	EPHB1	Ephrin type-B receptor 1 OS=Homo sapiens OX=9606 GN=EPHB1 PE=1 SV=1; Ephrin type-B receptor 2 OS=Homo sapiens OX=9606 GN=EPHB2 PE=1 SV=5	pY600	0.000454579	0.000372542	0.000340862	0.000411525	0.000398822	0.000396887	0.000364561	0.000447266	0.000420032
IYNGDY[+80]YR	AXL	Tyrosine-protein kinase receptor UFO OS=Homo sapiens OX=9606 GN=AXL PE=1 SV=4	pY702	0.00172954	0.00185365	0.00190935	0.0017496	0.00200881	0.0019643	0.00169391	0.00175329	0.00188901
IYQY[+80]IQSR	DYRK1B	Dual specificity tyrosine-phosphorylation-regulated kinase 1B OS=Homo sapiens OX=9606 GN=DYRK1B PE=1 SV=1; Dual specificity tyrosine-phosphorylation-regulated kinase 1A OS=Homo sapiens OX=9606 GN=DYRK1A PE=1 SV=2	pY273	0.230301	0.211577	0.216031	0.207634	0.250857	0.203319	0.178688	0.203751	0.186071
IY[+80]EPLDVK	PLA2G4A	Cytosolic phospholipase A2 OS=Homo sapiens OX=9606 GN=PLA2G4A PE=1 SV=2	pY535	0.00017195	0.000207316	0.000211199	0.000199164	0.000209028	0.000239062	0.000206397	0.000200931	0.000173153
KNPQEGLY[+80]NELQK	CD247	T-cell surface glycoprotein CD3 zeta chain OS=Homo sapiens OX=9606 GN=CD247 PE=1 SV=2	pY111	0.000301922	0.000316479	0.00024195	0.000195084	0.000302146	0.000287826	0.000283312	0.000206308	0.000377238
KPTY[+80]DPVSEDQDPLSSDFKR	TNK2	Activated CDC42 kinase 1 OS=Homo sapiens OX=9606 GN=TNK2 PE=1 SV=3	pY518	0.00067237	0.00090808	0.00093965	0.000679313	0.00130624	0.000824985	0.000659358	0.00109973	0.000764059
LC[+57]DFGSASHVADNDITPY[+80]LVSR	PRPF4B	Serine/threonine-protein kinase PRP4 homolog OS=Homo sapiens OX=9606 GN=PRPF4B PE=1 SV=3	pY849	1.00594	0.923849	0.899556	0.966012	1.0357	0.83387	0.877388	0.941284	0.928288
LDNGGY[+80]YITTR	YES1	Tyrosine-protein kinase Yes OS=Homo sapiens OX=9606 GN=YES1 PE=1 SV=3; Tyrosine-protein kinase Fyn OS=Homo sapiens OX=9606 GN=FYN PE=1 SV=3	pY222	6.67014e-05	5.72546e-05	4.99866e-05	5.84058e-05	7.19041e-05	5.20701e-05	5.52937e-05	7.04037e-05	3.6621e-05
LGEGTY[+80]ATVYK	CDK17	Cyclin-dependent kinase 17 OS=Homo sapiens OX=9606 GN=CDK17 PE=1 SV=2; Cyclin-dependent kinase 16 OS=Homo sapiens OX=9606 GN=CDK16 PE=1 SV=1	pY203	7.93144e-05	0.00899834	7.58317e-05	0.00759687	0.0103612	0.0108437	0.000101762	8.29066e-05	7.92316e-05
LHEY[+80]NTQFQEK	PIK3R1	Phosphatidylinositol 3-kinase regulatory subunit alpha OS=Homo sapiens OX=9606 GN=PIK3R1 PE=1 SV=2	pY452	0.000159021	0.000124917	0.000133122	0.000129536	0.000142152	0.000129615	0.000138165	0.00011517	0.000127493
LIEDNEY[+80]TAR	LCK	Tyrosine-protein kinase Lck OS=Homo sapiens OX=9606 GN=LCK PE=1 SV=6; Tyrosine-protein kinase Yes OS=Homo sapiens OX=9606 GN=YES1 PE=1 SV=3; Tyrosine-protein kinase Fyn OS=Homo sapiens OX=9606 GN=FYN PE=1 SV=3; Proto-oncogene tyrosine-protein kinase Src OS=Homo sapiens OX=9606 GN=SRC PE=1 SV=3	pY394	0.00411664	0.00344575	0.00402455	0.00444054	0.00361794	0.00477356	0.00405136	0.00307687	0.00444818
LIY[+80]LVPEK	ITSN2	Intersectin-2 OS=Homo sapiens OX=9606 GN=ITSN2 PE=1 SV=3	pY553	0.000633131	0.00071101	0.000698659	0.000612057	0.00083313	0.000640837	0.000658704	0.000732683	0.000594383
LPQDDDRPADEY[+80]DQPWEWNR	SHB	SH2 domain-containing adapter protein B OS=Homo sapiens OX=9606 GN=SHB PE=1 SV=2	pY336	0.00114745	0.00304517	0.00300655	0.00111836	0.00331913	0.00288264	0.00104643	0.00288168	0.00286322
LSLEGDHSTPPSAY[+80]GSVK	ANXA2P2	Putative annexin A2-like protein OS=Homo sapiens OX=9606 GN=ANXA2P2 PE=5 SV=2; Annexin A2 OS=Homo sapiens OX=9606 GN=ANXA2 PE=1 SV=2	pY24	0.00142992	0.00160733	0.00159062	0.00158403	0.00252863	0.00169133	0.00139264	0.00250675	0.00125174
LVNEAPVYSVY[+80]SK	STAM2	Signal transducing adapter molecule 2 OS=Homo sapiens OX=9606 GN=STAM2 PE=1 SV=1	pY374	0.000142912	0.000156105	0.000135248	0.000147923	0.000182853	0.000127951	0.000132586	0.000160713	0.00013818
LYSNAY[+80]LNDLAGC[+57]IK	ALDH1A1	Retinal dehydrogenase 1 OS=Homo sapiens OX=9606 GN=ALDH1A1 PE=1 SV=2	pY119	0.000256803	0.000256162	0.000268904	0.000258348	0.000189138	0.00024965	0.000177744	0.000216275	0.000258338
LY[+80]AVVTR	LYN	Tyrosine-protein kinase Lyn OS=Homo sapiens OX=9606 GN=LYN PE=1 SV=3	pY306	0.00260149	0.00420983	0.00414758	0.00171666	0.00940752	0.00561124	0.00172509	0.00902438	0.00775895
LY[+80]EEYTR	PIK3R1	Phosphatidylinositol 3-kinase regulatory subunit alpha OS=Homo sapiens OX=9606 GN=PIK3R1 PE=1 SV=2; Phosphatidylinositol 3-kinase regulatory subunit gamma OS=Homo sapiens OX=9606 GN=PIK3R3 PE=1 SV=2	pY467	0.00154246	0.00133048	0.00133605	0.00151158	0.0014598	0.00143669	0.0013281	0.00141406	0.0012439
NLIY[+80]DNADNK	PKP3	Plakophilin-3 OS=Homo sapiens OX=9606 GN=PKP3 PE=1 SV=1	pY390	0.00180187	0.00171987	0.00179794	0.00156897	0.001918	0.00347442	0.00143424	0.00189542	0.0017084
NPGFY[+80]VEANPMPTFK	PLCG1	1-phosphatidylinositol 4,5-bisphosphate phosphodiesterase gamma-1 OS=Homo sapiens OX=9606 GN=PLCG1 PE=1 SV=1	pY783	0.000794938	0.0049489	0.00442161	0.000717103	0.00639014	0.00372432	0.000674541	0.00580696	0.00356919
NPGNQAAY[+80]EHFETMK	VCL	Vinculin OS=Homo sapiens OX=9606 GN=VCL PE=1 SV=4	pY692	0.00629661	0.00418746	0.00419371	0.00460946	0.0046264	0.00330313	0.00376346	0.00358862	0.00295587
NPQEGLY[+80]NELQK	CD247	T-cell surface glycoprotein CD3 zeta chain OS=Homo sapiens OX=9606 GN=CD247 PE=1 SV=2	pY111	0.00011577	0.000112335	0.000106556	0.000115257	0.000111005	0.000107035	0.000101376	0.000136216	0.000111273
NQETY[+80]ETLKHEKPPQ	FCER1G	High affinity immunoglobulin epsilon receptor subunit gamma OS=Homo sapiens OX=9606 GN=FCER1G PE=1 SV=1	pY76	0.000236301	0.00027786	0.0002815	0.000238937	0.000331	0.000266203	0.0002426	0.000258332	0.000239072
NY[+80]VTPVNR	GRB2	Growth factor receptor-bound protein 2 GN=GRB2	pY209	0.000729996	0.00459738	0.00346722	0.000678396	0.0059101	0.00227046	0.000575197	0.00519072	0.00220209
QADSEMTGY[+80]VVTR	MAPK12	Mitogen-activated protein kinase 12 OS=Homo sapiens OX=9606 GN=MAPK12 PE=1 SV=3	pY185	0.00286393	0.00378177	0.0033576	0.00251724	0.00401235	0.00287204	0.00251282	0.00345635	0.00257289
QDVY[+80]GPQPQVR	CTNND1	Catenin delta-1 OS=Homo sapiens OX=9606 GN=CTNND1 PE=1 SV=1	pY257	0.000170795	0.000295975	0.000276193	0.000162428	0.000323936	0.000264972	0.00028371	0.000286768	0.000215245
QESTVSFNPY[+80]EPELAPWAADKGPQR	SYK	Tyrosine-protein kinase SYK OS=Homo sapiens OX=9606 GN=SYK PE=1 SV=1	pY323	8.19598e-05	0.000101157	8.03551e-05	7.99848e-05	7.70206e-05	8.94249e-05	7.85941e-05	7.97396e-05	8.06782e-05
QLLY[+80]SENK	FRK	Tyrosine-protein kinase FRK OS=Homo sapiens OX=9606 GN=FRK PE=1 SV=1	pY132	0.000959778	0.000916208	0.000939148	0.000959629	0.000981216	0.000974408	0.000916459	0.00088222	0.000907202
QYFEQY[+80]SR	TJP1	Tight junction protein ZO-1 OS=Homo sapiens OX=9606 GN=TJP1 PE=1 SV=3	pY1195	0.000515302	0.00105197	0.000969596	0.000342381	0.00134958	0.000780587	0.000467956	0.0010416	0.000868152
REEPEALY[+80]AAVNK	ITSN2	Intersectin-2 OS=Homo sapiens OX=9606 GN=ITSN2 PE=1 SV=3	pY968	0.000418761	0.000941422	0.000849486	0.000378431	0.00104933	0.000637878	0.000378852	0.00084305	0.000561413
RIEY[+80]IEAR	BRK1	Protein BRICK1 OS=Homo sapiens OX=9606 GN=BRK1 PE=1 SV=1	pY63	0.000604707	0.000648951	0.000653137	0.000525305	0.00074021	0.000621214	0.000499963	0.000814027	0.000557104
RPAGSVQNPVY[+80]HNQPLNPAPSR	EGFR	Epidermal growth factor receptor OS=Homo sapiens OX=9606 GN=EGFR PE=1 SV=2	pY1110	0.00134312	0.0207576	0.0189466	0.00128462	0.0245279	0.0158571	0.00123122	0.0214887	0.0158586
RPGPGTLY[+80]DVPR	BCAR1	Breast cancer anti-estrogen resistance protein 1 OS=Homo sapiens OX=9606 GN=BCAR1 PE=1 SV=2	pY387	0.0334198	0.0217831	0.023813	0.0357205	0.0189574	0.0259822	0.030641	0.0175139	0.0254314
SAEEAPLY[+80]SK	PTPN18	Tyrosine-protein phosphatase non-receptor type 18 OS=Homo sapiens OX=9606 GN=PTPN18 PE=1 SV=2	pY389	0.000151907	0.000164328	0.00016006	0.000142909	0.000181013	0.00016556	0.000141977	0.000150187	0.000159655
SDVY[+80]SDLNTQRPYYK	TYROBP	TYRO protein tyrosine kinase-binding protein OS=Homo sapiens OX=9606 GN=TYROBP PE=1 SV=1	pY102	0.000235371	0.000217829	0.000231329	0.000220083	0.00023858	0.000231882	0.000241038	0.000216801	0.000228408
SEDIY[+80]ADPAAYVMR	PLEKHA6	Pleckstrin homology domain-containing family A member 6 OS=Homo sapiens OX=9606 GN=PLEKHA6 PE=1 SV=4	pY492	0.00058309	0.000749292	0.000770702	0.000592731	0.000745848	0.000811905	0.000515465	0.000674643	0.000778241
SFLDSGY[+80]R	VCL	Vinculin OS=Homo sapiens OX=9606 GN=VCL PE=1 SV=4	pY822	0.0480564	0.0370404	0.0334825	0.0594575	0.056893	0.0571079	0.0511275	0.0536545	0.0453998
SGDLPY[+80]DGR	LSR	Lipolysis-stimulated lipoprotein receptor OS=Homo sapiens OX=9606 GN=LSR PE=1 SV=4	pY586	9.70871e-05	9.88656e-05	9.17499e-05	9.74197e-05	0.000104571	9.21589e-05	9.77477e-05	7.92804e-05	8.86096e-05
SLDNNY[+80]STPNER	CTNND1	Catenin delta-1 OS=Homo sapiens OX=9606 GN=CTNND1 PE=1 SV=1	pY904	0.000138368	0.000382394	0.000367791	0.000150066	0.000342318	0.000328678	0.000134979	0.000353033	0.000332724
SLYASSPGGVY[+80]ATR	VIM	Vimentin OS=Homo sapiens OX=9606 GN=VIM PE=1 SV=4	pY61	0.00210164	0.00219213	0.00207439	0.00231232	0.00228299	0.00212599	0.00221452	0.00241132	0.00206806
SNHY[+80]DPEEDEEYYR	TJP1	Tight junction protein ZO-1 OS=Homo sapiens OX=9606 GN=TJP1 PE=1 SV=3	pY1346	0.00730355	0.0123264	0.0127751	0.00630895	0.0057426	0.00576611	0.00539264	0.00548311	0.00599858
SNHY[+80]DPEEDEEYYRK	TJP1	Tight junction protein ZO-1 OS=Homo sapiens OX=9606 GN=TJP1 PE=1 SV=3	pY1346	0.000101046	0.000116458	0.000116594	0.000105146	0.000140017	0.000119796	0.000113534	0.000110533	0.000118104
SVNESLNNLFITEEDY[+80]QALR	CLTC	Clathrin heavy chain 1 OS=Homo sapiens OX=9606 GN=CLTC PE=1 SV=5	pY1477	0.000690318	0.000444373	0.00064268	0.000494153	0.000425651	0.000512988	0.000670861	0.000478325	0.00075885
SYSPY[+80]DMLESIR	ANXA2P2	Putative annexin A2-like protein OS=Homo sapiens OX=9606 GN=ANXA2P2 PE=5 SV=2; Annexin A2 OS=Homo sapiens OX=9606 GN=ANXA2 PE=1 SV=2	pY238	0.00264916	0.00262027	0.00254746	0.00236765	0.00287932	0.00244034	0.00240988	0.00254334	0.00271904
TAC[+57]TNFMMTPY[+80]VVTR	MAPK9	Mitogen-activated protein kinase 9 OS=Homo sapiens OX=9606 GN=MAPK9 PE=1 SV=2	pY185	0.00137121	0.00163533	0.00179283	0.0019483	0.00163394	0.00165824	0.00161987	0.00158021	0.0017602
TATESFASDPILY[+80]RPVAVALDTK	PKM	Pyruvate kinase PKM OS=Homo sapiens OX=9606 GN=PKM PE=1 SV=4	pY105	0.000720607	0.00070395	0.000642072	0.000673558	0.000752753	0.000752508	0.000665326	0.000702382	0.000763087
TMQFEPSTMVY[+80]DAC[+57]R	TLN1	Talin-1 OS=Homo sapiens OX=9606 GN=TLN1 PE=1 SV=3	pY26	0.00815265	0.00696893	0.00795697	0.011238	0.00965716	0.00837767	0.00998152	0.00841516	0.00795441
TSIDAY[+80]DNFDNISLAQR	CLTC	Clathrin heavy chain 1 OS=Homo sapiens OX=9606 GN=CLTC PE=1 SV=5	pY1487	0.00143226	0.000723952	0.00124221	0.00148169	0.000511491	0.000809883	0.000842451	0.000828718	0.000776859
TYVDPHTY[+80]EDPNQAVLK	EPHA2	Ephrin type-A receptor 2 OS=Homo sapiens OX=9606 GN=EPHA2 PE=1 SV=2	pY594	0.00404656	0.00364537	0.00342941	0.00355385	0.00433471	0.00354421	0.00302696	0.00507908	0.00312111
TY[+80]DMLK	PKP2	Plakophilin-2 OS=Homo sapiens OX=9606 GN=PKP2 PE=1 SV=2	pY108	0.000291764	0.000315401	0.000311116	0.000319809	0.000321244	0.000334227	0.00030731	0.000314625	0.000274277
TY[+80]VDPHTYEDPNQAVLK	EPHA2	Ephrin type-A receptor 2 OS=Homo sapiens OX=9606 GN=EPHA2 PE=1 SV=2	pY588	0.00224043	0.00183523	0.00165694	0.00211211	0.00229654	0.00192452	0.00210735	0.00207926	0.00178148
VADPDHDHTGFLTEY[+80]VATR	MAPK1	Mitogen-activated protein kinase 1 OS=Homo sapiens OX=9606 GN=MAPK1 PE=1 SV=3	pY187	0.259061	0.478218	0.353373	0.237092	0.629337	0.220489	0.226105	0.59303	0.223542
VDY[+80]VVVDQQK	GAB1	GRB2-associated-binding protein 1 OS=Homo sapiens OX=9606 GN=GAB1 PE=1 SV=2	pY659	0.00492729	0.063798	0.0357526	0.00465466	0.0511598	0.0453589	0.00296599	0.0412899	0.0379213
VENC[+57]PDELY[+80]DIMK	LYN	Tyrosine-protein kinase Lyn OS=Homo sapiens OX=9606 GN=LYN PE=1 SV=3	pY473	0.000761068	0.00082452	0.00089151	0.000880115	0.00107034	0.00094058	0.00086802	0.000901543	0.000883539
VGEEEHVY[+80]SFPNK	PXN	Paxillin OS=Homo sapiens OX=9606 GN=PXN PE=1 SV=3	pY118	0.0156751	0.0156928	0.0162916	0.0171897	0.0163421	0.017234	0.0135846	0.0133325	0.0162537
VGFQY[+80]EGTYK	G6PD	Glucose-6-phosphate 1-dehydrogenase OS=Homo sapiens OX=9606 GN=G6PD PE=1 SV=4	pY503	0.00539502	0.00456253	0.00465708	0.0051636	0.00525993	0.00472208	0.00483045	0.00522009	0.00444143
VIEDNEY[+80]TAR	LYN	Tyrosine-protein kinase Lyn OS=Homo sapiens OX=9606 GN=LYN PE=1 SV=3; Tyrosine-protein kinase HCK OS=Homo sapiens OX=9606 GN=HCK PE=1 SV=5	pY397	0.000813419	0.000834728	0.000838102	0.00101489	0.000624445	0.000922682	0.00090996	0.000596544	0.000913101
VIY[+80]DFIEK	WASL	Neural Wiskott-Aldrich syndrome protein OS=Homo sapiens OX=9606 GN=WASL PE=1 SV=2	pY256	0.00200031	0.0016258	0.00165788	0.00197863	0.00161305	0.00164414	0.00191249	0.00156332	0.001547
VLEDDPEATY[+80]TTSGGK	EPHA2	Ephrin type-A receptor 2 OS=Homo sapiens OX=9606 GN=EPHA2 PE=1 SV=2	pY772	0.00423826	0.00421956	0.00424378	0.00457292	0.00485139	0.00435662	0.00427906	0.00437668	0.00444336
VQIY[+80]HNPTANSFR	VASP	Vasodilator-stimulated phosphoprotein OS=Homo sapiens OX=9606 GN=VASP PE=1 SV=3	pY39	0.000465833	0.0004329	0.00043186	0.000463697	0.000525828	0.000443486	0.000476981	0.000467861	0.000452511
VSEKPSADY[+80]VLSVR	PTK6	Protein-tyrosine kinase 6 OS=Homo sapiens OX=9606 GN=PTK6 PE=1 SV=1	pY114	0.00111204	0.00116054	0.00116417	0.00112641	0.00115883	0.00103562	0.00114207	0.00117723	0.0011102
VTIADDY[+80]SDPFDAK	SHB	SH2 domain-containing adapter protein B OS=Homo sapiens OX=9606 GN=SHB PE=1 SV=2	pY246	0.000552988	0.000780145	0.000772015	0.000511313	0.000833023	0.000749869	0.000457133	0.000756569	0.000726876
VTPPEGY[+80]EVVTVFPK	PDLIM1	PDZ and LIM domain protein 1 OS=Homo sapiens OX=9606 GN=PDLIM1 PE=1 SV=4	pY321	7.40038e-05	0.000547036	0.000455924	7.74831e-05	0.000694727	0.000367947	8.93622e-05	0.000624733	0.00033155
VVY[+80]SAPR	CLDN3	Claudin-3 OS=Homo sapiens OX=9606 GN=CLDN3 PE=1 SV=1	pY198	0.000166705	0.000192755	0.00021294	0.000195146	0.000190872	0.000201129	0.000159649	0.000152658	0.000195474
VYTY[+80]IQSR	DYRK2	Dual specificity tyrosine-phosphorylation-regulated kinase 2 OS=Homo sapiens OX=9606 GN=DYRK2 PE=1 SV=3; Dual specificity tyrosine-phosphorylation-regulated kinase 4 OS=Homo sapiens OX=9606 GN=DYRK4 PE=1 SV=2	pY382	0.000397591	0.000368392	0.000355179	0.000443881	0.000415772	0.000390954	0.000406894	0.000379214	0.000390921
VY[+80]ENVGLMQQQK	PTPN11	Tyrosine-protein phosphatase non-receptor type 11 OS=Homo sapiens OX=9606 GN=PTPN11 PE=1 SV=2	pY584	0.000486636	0.00272987	0.00213775	0.00117167	0.00280962	0.00167365	0.0030263	0.00287535	0.00313237
WDTGENPIY[+80]K	ITGB1	Integrin beta-1 OS=Homo sapiens OX=9606 GN=ITGB1 PE=1 SV=2	pY783	0.00205716	0.00193919	0.00203344	0.00217486	0.00237968	0.00239708	0.00200726	0.00191556	0.00195699
YC[+57]RPESQEHPEADPGSAAPY[+80]LK	STAT3	Signal transducer and activator of transcription 3 OS=Homo sapiens OX=9606 GN=STAT3 PE=1 SV=2	pY705	0.00606059	0.00754652	0.00695295	0.00567516	0.00931991	0.00549044	0.00564403	0.00794582	0.00552511
YHGHSMSDPGVSY[+80]R	PDHA1	Pyruvate dehydrogenase E1 component subunit alpha, somatic form, mitochondrial OS=Homo sapiens OX=9606 GN=PDHA1 PE=1 SV=3; Pyruvate dehydrogenase E1 component subunit alpha, testis-specific form, mitochondrial OS=Homo sapiens OX=9606 GN=PDHA2 PE=1 SV=1	pY301	0.0679915	0.00010981	8.92823e-05	9.3614e-05	8.81077e-05	0.000109295	8.51964e-05	8.54106e-05	8.51133e-05
YIEDEDYY[+80]KASVTR	PTK2B	Protein-tyrosine kinase 2-beta OS=Homo sapiens OX=9606 GN=PTK2B PE=1 SV=2	pY580	0.00118003	0.00105601	0.00106038	0.00104101	0.00122955	0.00114922	0.00107065	0.00108769	0.000965661
YTEFY[+80]HVPTHSDASK	PDLIM5	PDZ and LIM domain protein 5 OS=Homo sapiens OX=9606 GN=PDLIM5 PE=1 SV=5	pY251	0.000103121	0.000126498	0.000132267	0.000114695	0.000138356	0.000125201	0.000118346	0.00012049	0.000117036
YVDSEGHLY[+80]TVPIR	CAV1	Caveolin-1 OS=Homo sapiens OX=9606 GN=CAV1 PE=1 SV=4	pY14	0.0101283	0.00886155	0.00907452	0.00956014	0.0114316	0.00974	0.00711807	0.00836523	0.00762766
YVLDDEY[+80]TSSVGSK	BTK	Tyrosine-protein kinase BTK OS=Homo sapiens OX=9606 GN=BTK PE=1 SV=3	pY551	7.61718e-05	9.90154e-05	8.77149e-05	0.000108001	8.42445e-05	6.18633e-05	9.00105e-05	8.0879e-05	0.000117503
YYGY[+80]TGAFR	LTF	Lactotransferrin OS=Homo sapiens OX=9606 GN=LTF PE=1 SV=6	pY547	0.00240485	0.0023224	0.00235743	0.00215644	0.00243179	0.00254309	0.00196789	0.00235719	0.002481
Y[+80]ANVIAYDHSR	PTPRF	Receptor-type tyrosine-protein phosphatase F OS=Homo sapiens OX=9606 GN=PTPRF PE=1 SV=2; Receptor-type tyrosine-protein phosphatase delta OS=Homo sapiens OX=9606 GN=PTPRD PE=1 SV=2; Receptor-type tyrosine-protein phosphatase S OS=Homo sapiens OX=9606 GN=PTPRS PE=1 SV=3	pY1381	0.000158131	0.000152785	0.000177177	0.000183153	0.000174955	0.000175085	0.000189902	0.000164794	0.000179603
Y[+80]ATPQVIQAPGPR	TNK2	Activated CDC42 kinase 1 OS=Homo sapiens OX=9606 GN=TNK2 PE=1 SV=3	pY827	0.00271159	0.0033184	0.00297943	0.00293815	0.00379466	0.00301803	0.0026321	0.00342521	0.0027572
Y[+80]LVIQGDER	EGFR	Epidermal growth factor receptor OS=Homo sapiens OX=9606 GN=EGFR PE=1 SV=2	pY978	0.00101466	0.000988234	0.00102888	0.00111317	0.00106322	0.00114079	0.00111852	0.00089779	0.001009
Y[+80]VLC[+57]PSTTPSPAQPADR	AXL	Tyrosine-protein kinase receptor UFO OS=Homo sapiens OX=9606 GN=AXL PE=1 SV=4	pY866	0.00251263	0.00260397	0.00263265	0.00359584	0.00297064	0.00283074	0.00206354	0.0024295	0.00242842
							1.47959	1.53562	1.34467	1.34402	1.41801	1.33176
