# Supplementary material for: High-Density, Targeted Monitoring of Tyrosine Phosphorylation Reveals Activated Signaling Networks in Human Tumors
Source: Oxford University Press journal article supplement (doi:10.1158/0008-5472.can-20-3804), 2021-01-28
Supplement: 00085472can203804-sup-255483_2_supp_6838245_qmsgw0.xlsx [file 00085472can203804-sup-255483_2_supp_6838245_qmsgw0.xlsx]

## Sheet: S6
Supplementary Table S6: Light to heavy ratios and Z-score normalized ratios of peptides identified in at least half of tumors (expanded matrix) and across all tumors (full matrix).
Table S6.1	Z-score normalized L:H ratios of peptides identified in all tumors.
Table S6.2	L:H ratios of all peptides identified in at least half of all tumors (expanded matrix).
Table S6.3	Z-score normalized L:H ratios of peptides identified in at least half of all tumors (expanded matrix).

## Sheet: Table 6.1
Table 6.1	Z-score normalized L:H ratios of peptides identified in all tumors.
Z-scored L/H ratio for all peptides in full matrix.
Blanks indicate an unquantifiable peptide
					L/H ratios
Peptide #	Modified Sequence	UniProt ID	Gene ID	Tyr Phosphosite	Tumor 1	Tumor 2	Tumor 3	Tumor 4	Tumor 5	Tumor 6	Tumor 7	Tumor 8	Tumor 9	Tumor 10	Tumor 11	Tumor 12	Tumor 13	Tumor 14	Tumor 15	Tumor 16	Tumor 17	Tumor 18	Tumor 19	Tumor 20	Tumor 21	Tumor 22	Tumor 23	Tumor 24	Tumor 25	Tumor 26	Tumor 27	Tumor 28	Tumor 29	Tumor 30	Tumor 31
Peptide1	ADY[+80]DTLSLR	Q9Y446	PKP3	pY176	0.69723	1.8562	-0.484475	-0.704647	-0.475315	-0.603501	1.13287	-0.171831	2.66638	-0.848476	-0.777829	-0.162177	-0.51519	-0.791372	-0.0826806	-0.716223	-0.926031	-0.576565	0.254447	-0.804691	-0.105659	-0.423069	0.165321	-0.670874	1.94215	1.17059	-0.502612	-0.803283	-0.719089	2.10236	-0.121961		Modifications key
Peptide2	AEDGSVIDY[+80]ELIDQDAR	P07355	ANXA2	pY188	3.37268	-1.05547	0.191112	-0.30299	0.205623	-1.13675	1.12117	0.469257	1.46956	-1.12202	-0.787464	-0.376477	-1.03057	-0.891576	0.973207	-0.270536	0.939015	-0.597817	-0.567322	-0.566793	-0.115592	0.183307	0.0414906	1.96121	-0.687681	-0.179872	-0.486481	-0.879601	0.0280739	0.377318	-0.278008		Y[+80] = Tyrosine phosphorylation
Peptide3	AEFAEY[+80]ASVDR	Q9NWQ8	PAG1	pY227	-0.25892	-0.727956	0.372488	-0.524731	-0.0452018	1.00994	-0.182602	-0.611815	3.01318	-1.17986	-0.689897	0.326927	0.451534	-0.953878	0.52603	-1.1423	0.920871	-0.467298	0.43764	-0.639288	-0.592818	-0.128142	0.403306	-0.319966	1.13477	-0.692944	-0.846788	-1.18678	-0.661531	2.59714	0.658895		T[+80] = Threonine phosphorylation
Peptide6	AGSLPNY[+80]ATINGK	Q9HBL0	TNS1	pY1404	-0.239719	-0.509749	-0.124341	0.915873	-0.725358	-0.718281	-0.236631	-0.783399	3.7762	-0.955579	-0.356662	-0.893961	-0.737044	-0.713486	1.4135	0.183614	-0.674807	-0.018601	-0.625685	-0.167919	0.575433	1.99182	-0.150057	1.00423	-0.523285	-0.670868	-0.569715	0.438624	0.422018	0.195036	-0.521194		S[+80] = Serine phosphorylation
Peptide8	ALDY[+80]YMLR	Q9Y490	TLN1	pY70	-0.851499	1.61277	-0.71596	-0.45461	-0.78038	-1.01983	1.78563	-0.85625	0.542743	-1.19953	-0.616688	0.371651	-0.873872	-1.51886	0.325	-0.102192	-0.810857	-0.354005	0.190699	1.44073	1.63119	0.3731	1.71087	0.799264	0.611669	0.191521	-0.824868	-1.48265	-0.122882	1.46911	-0.470991		C[+57] = Carboxyamidomethylcysteine
Peptide9	ALELDPNLY[+80]R	P35580	MYH10	pY761	-0.463174	0.141077	-0.120285	-0.517183	-0.577004	-0.550459	-0.268678	-0.605017	0.0547464	-0.54629	-0.201855	-0.497097	-0.543184	-0.391617	-0.268759	3.99664	-0.166812	0.289461	-0.362583	-0.157427	1.07804	0.128191	-0.373703	-0.058543	2.93998	-0.600745	-0.366782	-0.136809	0.18365	-0.459699	-0.578081
Peptide10	ALELDSNLY[+80]R	P35579	MYH9	pY754	-1.24094	-0.721246	-0.550833	-0.401384	-1.0293	-0.790434	-0.455747	-1.28932	1.11768	-0.495026	0.519744	0.815976	-0.462097	-0.0744884	0.490907	-0.181092	1.42087	-0.0641285	1.37513	2.7602	-0.7521	1.0986	0.271363	1.56594	-0.471765	-1.02111	-0.424812	-1.45711	-0.316021	1.15827	-0.395717
Peptide12	ALPQNDDHY[+80]VMQEHR	Q07912	TNK2	pY284	2.10324	0.0711372	-0.0382142	-0.739015	-1.1062	-0.887525	0.19849	-0.314673	1.27791	-1.70908	-0.261094	-0.720311	-0.895123	0.353947	-0.698364	0.659086	0.107983	-0.627352	0.564588	0.944215	0.743997	0.0918587	0.0868671	0.20896	0.0824314	-0.645737	-0.697466	-1.16109	0.349795	3.29633	-0.639593
Peptide14	APTNEFY[+80]A	P31431	SDC4	pY197	0.0603539	1.4527	1.46824	0.619247	0.385344	-0.684842	0.00750083	0.177769	1.71563	0.440314	-0.310138	0.770228	0.0142078	-0.677269	-0.942677	0.718104	-0.96145	-3.1525	-0.297043	0.161342	0.303888	-0.797196	-0.562094	-0.808441	-0.285655	1.27316	0.1637	-0.564406	-0.736313	1.78785	-0.739567
Peptide16	AQQGLY[+80]QVPGPSPQFQSPPAK	P56945	BCAR1	pY128	1.35162	-0.144546	1.02775	-0.139218	-0.710909	-1.14511	0.346382	0.025679	3.07333	-1.546	-0.92298	0.0548478	-0.810247	-0.729726	1.15146	-0.537086	-0.740143	-0.715904	-0.103893	-0.223139	-0.114757	-0.310331	0.121053	2.4128	-0.620596	-0.73696	-0.612489	0.116967	0.644646	0.861131	-0.323636
Peptide17	AQY[+80]EDIANR	O95678	KRT75	pY327	4.10757	-0.447996	-0.356762	-0.703574	-0.231944	-0.620481	-0.205222	-0.338174	0.648185	-0.248717	-0.624075	0.72597	-0.655999	1.04635	-0.153615	-0.240111	0.386072	-0.206557	-0.301012	-0.484325	1.57213	-0.400438	-0.314387	-0.639849	-0.295028	-0.738317	-0.315597	1.77685	-0.815181	-0.643984	-0.281774
Peptide20	AY[+80]TNFDAER	A6NMY6	ANXA2P2	pY30	-0.509767	0.51642	2.2237	-0.64686	-0.50183	-0.77125	-0.452514	1.56653	-0.621601	-0.563043	-0.732612	-0.711987	-0.736325	-0.650492	-0.195155	-0.661228	-0.722765	0.320952	-0.609637	-0.742312	-0.161671	-0.555363	-0.718751	2.00481	0.381944	-0.567901	1.26449	-0.198715	2.14589	-0.420323	2.02736
Peptide25	DGHPLSPERDHLEGLY[+80]AK	Q8TEW8	PARD3B	pY1000	3.79675	-0.0291564	0.238931	-0.32205	-0.404464	-0.41842	-0.238683	-0.165264	3.55306	-0.521526	-0.497249	-0.0290407	-0.471572	-0.368189	-0.27609	-0.246423	-0.403198	-0.465417	-0.198261	-0.432932	-0.296664	-0.179666	-0.319741	0.0468555	0.0652181	-0.294246	-0.265373	-0.463764	-0.265834	0.129959	-0.257552
Peptide28	DHLEGLY[+80]AK	Q8TEW8	PARD3B	pY1000	1.04151	-0.114368	-0.216275	0.221229	-0.510373	-0.61752	0.148002	0.0366497	5.00076	-0.695078	-0.553227	0.214769	-0.191827	-0.117123	-0.222015	-0.236895	-0.418046	-0.651276	0.441833	-0.377671	0.0474778	-0.266246	-0.470947	0.273161	0.0383494	-0.363663	-0.311994	-0.602493	-0.372421	0.136787	-0.291074
Peptide31	DLEY[+80]LDLK	Q6IQ23	PLEKHA7	pY665	2.22648	0.311066	-0.0887374	-0.554982	0.38309	-0.354257	1.26215	1.09884	1.47225	-0.913951	-0.843573	-0.435104	0.242563	-0.293416	3.28757	-0.597216	0.462075	-1.24001	-0.408891	-1.06543	-0.325882	-0.672589	-0.495226	-0.667187	-0.593761	0.253561	-0.534707	-0.659477	-0.241293	0.643225	-0.65719
Peptide34	DQEAPSTTEY[+80]SEIK	O15389	SIGLEC5	pY544	-0.845481	-0.731663	-0.754733	-0.224768	-0.404122	2.06086	-0.261218	-0.638102	-0.241212	-0.432829	0.0695317	0.885517	0.703979	-0.809719	-0.56297	-0.75967	2.94569	-0.650437	1.4221	0.594929	-0.753939	0.0790776	-0.790573	-0.508046	1.30908	-0.732249	-0.84355	-0.537118	-0.801476	1.77309	0.440014
Peptide35	DQY[+80]LMWLTQK	P27986	PIK3R1	pY580	0.432079	0.783897	0.193547	-1.93602	-0.200187	-1.25421	0.309972	-0.173384	0.798328	-1.52628	-1.18081	0.732788	0.523814	-0.722452	0.517024	0.414586	-1.76099	-0.084898	-1.45057	-0.0665516	0.861637	0.00356905	2.20301	0.828244	-0.515332	-0.387913	0.100099	-0.463048	1.32168	-0.202496	1.90087
Peptide37	DSSTC[+57]PGDY[+80]VLSVSENSR	P46109	CRKL	pY48	-0.418857	-0.116066	-0.218906	-0.643392	-0.040315	-1.29423	0.135792	-0.239086	-0.259106	-0.665849	-0.674283	-0.672574	0.788734	-0.367123	-0.414594	0.132193	4.60826	-0.0718239	-0.39934	0.143565	0.263379	-0.233502	-0.531666	0.169762	1.73025	-0.283387	-0.104736	-0.4033	0.0100351	0.286342	-0.216176
Peptide38	DSSTSPGDY[+80]VLSVSENSR	P46108	CRK	pY47	-0.27829	-0.131987	0.0704564	-0.293926	-0.0151117	-0.235915	0.0690894	-0.135789	-0.0660408	-0.543195	-0.42846	-0.202542	1.07285	-0.491254	-0.508225	0.0384149	5.13393	1.44e-05	0.0447704	0.0959102	0.0778529	-0.28334	-0.351615	-0.179899	-0.18387	-0.426472	-0.290362	-0.537802	-0.406774	-0.253393	-0.359026
Peptide39	DSTY[+80]DLPR	Q9UQC2	GAB2	pY266	0.972483	1.13764	-0.629485	0.500675	0.66308	-0.0508008	0.364183	0.18496	3.2963	-1.31993	-0.422212	-0.530453	0.599156	-1.05219	-0.228725	0.440817	0.197605	-0.822636	-0.38886	1.34148	1.22953	-1.1686	-0.0238943	-0.508581	-0.800823	-0.467199	-1.68266	-1.02803	0.87701	-0.0461384	-0.633711
Peptide42	DWSHY[+80]FK	P05783	KRT18	pY129	0.0154921	-0.0958738	-0.152485	-0.177219	-0.13472	-0.089832	-0.154406	-0.110666	-0.140745	-0.188182	-0.205767	-0.228875	-0.189963	-0.184404	-0.117502	-0.203573	5.37733	-0.215939	-0.180064	-0.198289	-0.237892	-0.188701	-0.201214	-0.304868	-0.272357	-0.127598	-0.268069	-0.265144	-0.220746	-0.158372	-0.179358
Peptide43	DY[+80]HFVTSR	Q12959	DLG1	pY760	1.39869	2.40881	-0.381318	-0.870416	-0.556808	-0.748225	0.958315	0.49969	1.21882	-1.01542	-0.295313	-0.559186	-1.0843	-0.348866	-0.997609	1.55803	-1.22367	-0.847529	-0.926686	-0.879529	1.12437	-0.450828	-0.676021	-0.53539	1.32016	1.09744	0.15277	-0.599238	-0.650394	1.07459	0.835054
Peptide44	DY[+80]LIDGSR	P18206	VCL	pY107	-0.371181	-0.32187	-0.255522	-0.238501	-0.523674	-0.56526	-0.377754	-0.686575	-0.127479	-0.690905	-0.141819	-0.34797	-0.32778	-0.230832	-0.223006	4.72312	0.616364	0.185421	-0.0431223	0.122235	1.94691	0.210434	-0.280532	-0.169827	-0.547383	-0.38047	-0.315514	0.0027381	0.103313	-0.183279	-0.560277
Peptide46	DY[+80]STLTSVSSHDSR	P16144	ITGB4	pY1510	1.01664	0.758687	-0.68059	-0.687376	-0.508984	-0.537181	0.183325	0.0719978	4.31598	-0.787933	-0.253549	-0.247049	-0.055922	0.0383822	-0.0737151	0.356322	-0.984059	-0.63902	-0.84777	-0.729899	0.646851	-0.325455	-0.268621	-0.641106	0.226568	0.41484	-0.268686	-0.769988	-0.335174	1.64926	-0.036762
Peptide49	EAAY[+80]HPEVAPDVR	Q9Y490	TLN1	pY2224	-0.581329	0.423852	-0.621119	-0.545351	-0.452347	-1.60714	0.697978	-0.927143	1.26786	-1.34891	1.04959	-0.0882379	-1.62964	-0.950392	-0.266198	0.670125	2.61379	-0.5265	-0.437727	0.134039	0.135534	0.520115	1.5434	1.92257	-0.536604	-0.732754	0.304438	-0.517491	-0.20367	1.01519	-0.325926
Peptide50	EATQPEPIY[+80]AESTK	Q86YV5	PRAG1	pY413	0.861257	-0.32661	2.63688	0.0193124	-0.790543	-0.834198	1.89174	-0.170683	0.43685	-0.925693	-0.509356	1.23808	-0.0777992	-0.911624	0.237286	-1.03332	-1.00482	-0.805279	0.0937061	-0.527317	0.0791275	-1.02999	1.27417	1.6032	1.75791	-0.605502	-0.470187	-0.536915	-0.05001	-1.02334	-0.49634
Peptide51	EC[+57]DY[+80]SIDGINR	Q9Y4G6	TLN2	pY1665	0.718951	0.141694	-0.0302751	-0.724448	0.0256173	-1.77077	1.8072	-0.956635	2.12759	-2.66403	-0.482033	-0.992732	-0.0933656	0.115437	1.76005	-0.0119994	-0.472794	0.111888	0.566224	0.616719	0.937981	-0.0260954	-0.137781	1.42522	-0.668141	-0.990719	0.189132	-0.319909	-0.143889	0.288888	-0.346978
Peptide53	EEPEALY[+80]AAVNK	Q9NZM3	ITSN2	pY968	1.04353	0.177006	1.99061	-0.722384	-0.009838	-0.477649	1.91143	0.478973	2.25325	-1.55488	-0.684484	0.135244	-0.625911	-1.3082	0.501965	-1.3034	-1.23284	-0.661029	0.291344	-0.308518	-0.158536	-0.292625	1.42025	0.313396	-0.0690246	-0.658069	-0.345944	-1.25225	0.987199	0.702117	-0.540734
Peptide55	EEY[+80]DVLDK	P20963	CD247	pY83	0.45915	-0.512357	0.458871	-0.826632	-0.527306	-0.921437	-0.893697	-0.494289	-1.09828	0.97223	1.40653	-0.638954	-1.05521	0.569632	0.963201	-1.57771	1.57903	0.25004	-0.939117	-1.35368	-2.36908	1.15117	0.990147	0.307638	0.750434	1.06144	0.161452	0.616638	1.15687	0.557349	-0.20408
Peptide57	EIDVSY[+80]VK	P54760	EPHB4	pY614	0.505887	1.20727	1.73461	-1.29608	2.47543	-0.501447	-0.085916	-1.12498	-0.497946	0.870852	-0.992488	-1.13367	1.30725	-0.818533	0.721195	-0.739449	0.0334406	-1.32284	0.895933	0.137813	0.743564	-0.283778	-1.01421	1.49141	-0.663217	-0.817772	-0.0458753	-0.718634	0.437829	0.386556	-0.892208
Peptide58	EIENLTQQY[+80]EEK	P35749	MYH11	pY1408	-0.290717	-0.303365	-0.187618	-0.260035	-0.302496	-0.302074	-0.288388	-0.303332	-0.232047	-0.303001	-0.149308	-0.288879	-0.282543	-0.194332	-0.277796	5.12838	0.116237	0.0510919	-0.217893	-0.293504	1.36087	0.0403339	-0.289106	-0.270089	-0.297882	-0.304304	-0.271291	-0.117756	-0.0632718	-0.300831	-0.305054
Peptide60	EKPAQDPLY[+80]DVPNASGGQAGGPQRPGR	Q13671	RIN1	pY36	0.843307	0.00152376	-0.0887099	-0.306825	2.0989	-0.596364	1.30308	-0.063541	2.29929	-1.08058	-0.831697	-0.443815	-0.376705	-0.953832	-0.201766	-0.649222	-0.901419	-0.774356	1.82933	-0.332383	0.216661	0.241806	-0.629336	-0.169739	0.334376	-0.46429	-0.768688	-0.964992	-0.228941	2.44027	-0.781358
Peptide63	ELY[+80]GEVIR	Q92835	INPP5D	pY221	-0.992526	0.912246	1.73108	-0.992113	0.120458	-1.04885	-0.551925	1.82603	-0.928153	-0.221572	-1.00783	-0.992657	-1.01475	-0.477464	0.765985	-0.630796	-0.767975	0.975778	-1.06612	-0.827347	0.268978	-0.706688	-0.819644	1.35739	1.04669	-0.560614	1.31165	0.685628	1.75576	-0.208295	1.05764
Peptide64	ENDY[+80]ESISDLQQGR	Q9NWQ8	PAG1	pY417	-0.824037	-0.56907	0.859753	-0.36858	-0.834893	0.157509	-0.780658	0.0818677	-0.681008	-1.00997	2.5096	1.43523	-0.151908	-0.911343	0.29364	0.329325	-0.956931	0.0781685	3.29106	-0.647644	-0.19539	-0.938311	0.0428467	0.408266	0.322256	0.458678	-0.963134	-1.07944	0.333294	-0.0291493	0.339979
Peptide65	EQY[+80]DVPQEWR	Q9UKN1	MUC12	pY5413	-0.424941	0.103505	0.346746	-0.923761	-0.788959	-0.127262	-0.517525	-0.471088	1.27168	-0.860255	-0.879932	-0.549246	-0.872978	3.17278	-0.594995	0.674654	-0.570022	-0.161615	-0.871849	-0.919016	0.00644163	0.0360253	2.77855	0.0793529	0.726217	0.832192	-0.151142	0.959028	-0.619544	-0.635145	-0.0478972
Peptide66	ERDY[+80]AEIQDFHR	Q8TEW0	PARD3	pY1080	3.53973	1.72194	-0.515834	0.207599	-0.577772	-0.499778	1.85048	0.826638	1.80794	-0.750732	-0.605971	-0.556764	-0.547847	-0.645269	-0.0621038	-0.635479	-0.773148	-0.630144	-0.441202	-0.576833	-0.404668	-0.397828	-0.242831	-0.367616	0.636548	0.556018	-0.450886	-0.735012	-0.436407	0.119778	-0.412542
Peptide69	EVPIY[+80]ANR	Q13443	ADAM9	pY769	0.187372	-0.0615936	4.66261	-0.250189	0.39774	-0.673857	0.4552	-0.293833	0.865548	-0.866617	-0.454244	-0.359612	-0.469526	0.781498	0.237811	0.308443	-0.655154	-0.430327	0.0483085	-0.673457	-0.0889665	-0.385203	-0.0869442	-0.092353	-0.521286	-0.0115296	-0.855219	-0.630122	-0.733488	1.04645	-0.397452
Peptide70	EYDQLY[+80]EEYTR	O00459	PIK3R2	pY464	0.681903	0.808398	-0.766823	-1.10564	0.822941	0.144403	1.44596	1.06133	-0.162044	-0.871253	-0.504076	2.72342	-1.03567	-0.797792	-0.292589	-0.352106	-1.34815	-0.794384	0.0035448	-0.471569	0.419097	-0.708843	0.00517043	-0.459752	2.16349	1.18524	-0.562324	-0.948026	-0.732279	1.02514	-0.576711
Peptide71	EYDRLY[+80]EEYTR	P27986	PIK3R1	pY467	0.0592099	-0.0249704	-0.467729	-1.11809	-0.865629	-0.637265	-0.842212	1.54544	0.19231	-0.579223	-0.00936938	-0.264805	-0.87866	-1.03126	0.252095	-0.891377	-2.23211	-0.014171	1.66267	1.23856	-0.336416	0.442048	1.84292	0.0121378	0.813568	-0.561526	0.151275	-1.33754	0.843405	1.37667	1.66004
Peptide72	FANY[+80]IDK	P08670	VIM	pY117	-1.58847	1.28762	-0.791752	0.330854	-1.11319	-0.51222	0.477039	-1.22918	-0.192336	-0.835635	-0.519748	0.343075	-0.472534	0.573911	1.10211	-1.14006	-0.124517	-1.26635	1.84515	2.77748	-0.0328471	-0.149028	1.6072	0.622199	0.802043	-0.277012	0.141295	-0.849335	-0.653542	0.0164479	-0.178662
Peptide73	FANY[+80]IEK	P17661	DES	pY122	-0.0557018	-0.29049	-0.0923568	-0.160294	-0.759278	-0.382482	0.136519	-0.335087	0.37533	-0.612753	0.20802	-0.318944	-0.520596	0.194335	-0.466786	3.35162	-0.428006	0.657749	-0.267204	-0.363845	3.24956	0.477584	-0.384365	-0.451525	-0.596021	-0.919394	-0.649334	-0.387632	1.30897	-0.699881	-0.817708
Peptide74	FASEASGY[+80]QDNIAR	P17661	DES	pY363	-0.319279	-0.333373	-0.165634	-0.321979	-0.32761	-0.33668	-0.329079	-0.330465	-0.30748	-0.330215	-0.240398	-0.335153	-0.323243	-0.27597	-0.331515	4.93233	-0.231415	0.329961	-0.300315	-0.334429	1.78618	0.0566868	-0.331815	-0.297364	-0.323246	-0.0312469	-0.279682	0.0858359	0.222344	-0.336085	-0.339674
Peptide76	FAVPTY[+80]AAK	Q13443	ADAM9	pY778	-0.287354	-0.1539	5.06109	-0.0422302	0.396398	-0.201413	-0.0708446	-0.105739	-0.0295877	-0.474297	-0.369459	-0.415421	-0.026725	0.466133	-0.356362	-0.12781	-0.223499	-0.245278	-0.393485	-0.399284	-0.158387	-0.307011	-0.227405	-0.433835	-0.311237	-0.128834	-0.513181	-0.449284	-0.525349	1.22461	-0.171014
Peptide77	FEEPAPLSY[+80]DSRPR	Q07157	TJP1	pY1140	2.95974	0.347938	-0.203231	-0.497325	-0.0555299	-1.39624	-0.443278	-0.909547	1.60251	-0.587126	0.58972	-0.125265	-1.3004	0.155418	0.324848	-0.793483	-0.0240879	-1.18304	0.698252	-1.33876	1.14243	0.946298	-0.256541	-0.0283852	0.884151	-0.235846	0.0730945	-1.18864	1.07742	1.05209	-1.28718
Peptide79	FHPEPY[+80]GLEDDQR	O60716	CTNND1	pY280	1.0872	2.0371	-0.0221475	-0.196878	0.293074	-0.669397	0.614947	-0.0221448	2.85368	-1.37733	-0.960457	1.70217	0.532222	1.10888	0.849338	-0.586275	-0.795146	-1.22917	-0.384802	-0.458111	0.502295	-0.797776	-0.978223	-0.487175	0.546511	-0.176868	-0.740483	-1.06346	-0.770111	-0.146971	-0.264502
Peptide80	FIHQQPQSSSPVY[+80]GSSAK	P49023	PXN	pY88	0.495418	-0.579317	-0.26135	1.34112	-0.43163	0.293437	-0.151333	-0.00502483	3.90587	-0.889669	-0.559832	-0.48243	-0.56088	-0.457133	-0.176218	-0.450164	-0.11499	-0.236043	-0.490224	-0.248851	-0.368783	-0.30418	0.027546	0.665711	-0.366455	-0.617232	-0.327214	-0.479775	-0.221193	2.73684	-0.68602
Peptide81	FLEDDPSDPTY[+80]TSSLGGK	P54753	EPHB3	pY792	0.407523	3.36078	-0.644395	-0.39894	-0.311625	0.566287	0.0138749	-0.246164	-0.220403	-0.475788	-0.387007	-0.0698865	1.20396	-0.628381	-0.597703	-0.22427	-0.287935	-0.429229	-0.65073	-0.529106	-0.368669	-0.270001	-0.300091	-0.532274	-0.438062	3.44823	-0.413226	-0.536566	-0.665995	0.123661	0.502129
Peptide82	FQKEIENLTQQY[+80]EEK	P35749	MYH11	pY1408	0.897417	-0.575209	-0.470791	-0.602405	1.39718	-0.649212	-0.509158	0.409452	0.349935	0.41815	-0.66126	-0.988157	0.23095	-0.954024	-0.132541	3.35265	-0.603024	0.0457751	-0.353388	-0.286145	0.804657	-1.08412	0.31627	-0.408901	-0.366554	-0.920006	-0.324133	-0.823686	2.41289	-0.765847	0.843243
Peptide83	GAY[+80]SLSIR	P07947	YES1	pY194	-0.276796	0.0315455	0.415705	-0.7533	-0.645396	0.105286	0.64675	-0.324168	1.58255	-1.98859	0.0169824	0.190966	0.0188436	-1.12641	0.24528	2.08949	-0.342173	-1.14266	1.4999	2.34409	0.114445	0.976651	-0.657362	0.381716	0.692738	-1.26112	-1.23523	-1.11703	-0.249786	0.327821	-0.560733
Peptide87	GEPNVSY[+80]IC[+57]SR	P49840	GSK3A	pY279	1.4559	0.389971	-0.512853	-0.793436	-0.441327	-0.728795	1.12108	-0.641176	2.37345	-1.32347	0.171129	-0.851174	-1.03635	-0.399485	-0.0345661	2.18437	-1.4246	-0.521332	-0.200813	-0.830171	1.0293	0.840583	0.113295	-0.220427	0.0980247	0.98478	-0.7064	-0.687124	-0.111793	1.6222	-0.918789
Peptide88	GGGPYDAPGGDDSY[+80]I	Q9HBB8	CDHR5	pY844	-0.876213	-0.98275	-0.70226	-0.366543	-0.831748	-0.660855	-0.837364	0.615581	-1.05338	-0.0764984	0.604457	-0.718864	-0.155441	-1.38338	1.21887	-0.208196	0.963646	0.275798	-0.539702	0.471618	3.13096	0.446157	0.156413	-0.139279	-1.31272	-0.110419	0.262978	0.32951	2.46528	-0.445995	0.460338
Peptide89	GHDGLY[+80]QGLSTATK	P20963	CD247	pY142	1.22613	-0.585067	1.52064	-0.800321	0.383208	-0.298118	1.03247	2.37385	1.15729	-1.38912	-0.14292	-0.687776	-0.47768	-0.574895	-0.148093	-0.558429	0.144417	-1.01553	-0.0323088	0.550088	0.416577	0.235468	0.215221	-0.735537	-1.05784	-0.889141	-0.230701	-0.433563	2.7133	-0.734884	-1.17674
Peptide90	GHEY[+80]TNIK	Q06124	PTPN11	pY546	-0.617537	-0.10223	2.08628	1.20763	0.204862	0.369323	0.302907	-1.10638	2.65832	-1.22936	-0.571411	-0.60368	-0.697763	-0.799057	0.180623	0.668172	-1.1675	-0.89112	-0.206302	1.51113	1.23959	1.21081	-0.0412352	0.299199	-0.729247	-0.514279	-1.10544	-1.09273	-0.689373	0.377015	-0.151211
Peptide102	GQEATDTEY[+80]SEIK	Q9Y336	SIGLEC9	pY456	-0.850399	-0.928502	-0.0954845	1.73032	-0.683027	0.972721	-0.305958	-1.51029	0.589362	-1.25909	0.576751	0.998454	0.741244	-0.939812	-0.691961	-1.135	1.55618	0.263073	-0.242499	1.91052	-0.490359	0.591618	-0.530337	-0.747642	1.33559	-0.869708	-1.09174	-0.233732	-0.700287	1.78615	0.253834
Peptide107	GSTAENAEY[+80]LR	P00533	EGFR	pY1197	0.946145	0.67705	-0.323329	-0.183276	-0.410477	-0.550308	0.522669	0.158549	4.64895	-0.788691	-0.482777	-0.192507	-0.541443	-0.586712	-0.488834	-0.146378	-0.61246	-0.614822	-0.530971	-0.65441	0.111004	-0.140893	-0.482984	0.278805	0.241733	0.951291	-0.505946	-0.574482	-0.0333893	0.836802	-0.527912
Peptide110	GVITDQNSDGY[+80]C[+57]QTGTMSR	P15924	DSP	pY56	3.16726	-0.193621	-0.62102	2.9695	0.128704	-0.547944	1.74949	0.309905	-0.117934	-0.78763	-0.596499	0.26523	-0.237018	0.00329518	1.03161	-0.629268	-0.732949	-0.507259	0.615376	-0.631935	-0.364583	-0.58442	-0.380118	-0.715078	-0.541234	0.320947	-0.616204	-0.703844	-0.536814	0.117388	-0.633342
Peptide112	GY[+80]FFLDER	P50479	PDLIM4	pY293	0.3112	2.4137	0.992507	1.5656	0.0274446	-0.45886	0.431316	2.02205	0.510243	-1.08835	0.0782427	-0.701384	1.46072	-1.19543	-0.771355	1.29213	-1.08941	-0.782577	0.494576	0.112375	0.428055	-0.977097	-0.677178	-0.751255	0.35288	-0.663458	-0.545853	-1.59487	-0.678636	0.03006	-0.547389
Peptide115	HADAEMTGY[+80]VVTR	O15264	MAPK13	pY182	1.05501	0.302031	-0.488017	-0.845991	1.10891	-0.721597	1.53886	0.735036	-0.0864599	-0.928868	-0.87579	1.3131	-0.77648	3.75193	-0.119332	0.14372	-0.909878	-0.729715	0.168842	-0.336044	0.0928679	-0.456003	-0.21095	-0.86732	0.708398	-0.0774533	-0.456666	-0.883664	0.246829	-0.524291	-0.871016
Peptide114	HADAEMT[+80]GY[+80]VVTR	O15264	MAPK13	pT180;pY182	-0.311835	-0.452339	-0.0923721	-0.68707	0.334638	-0.589864	1.2615	0.381603	-0.284164	-0.688046	-0.670117	1.56571	-0.614902	4.23476	1.21333	-0.108893	-0.600161	-0.150881	-0.586448	-0.648782	0.281888	-0.356997	0.723084	-0.602604	0.21671	-0.435026	-0.254622	-0.60132	-0.186872	-0.629381	-0.660528
Peptide117	HELQANC[+57]Y[+80]EEVKDR	P23528	CFL1	pY140	0.839089	2.32114	-0.382661	-0.79198	0.498793	-0.959151	1.65747	0.219568	0.984779	-1.27625	-1.34716	-0.288822	-1.43298	-0.427081	-0.940912	0.615397	1.57978	-0.61725	-1.59006	-0.21557	1.5087	-0.321768	0.202978	-0.097049	1.30431	0.693419	-0.16218	-0.400659	-0.725245	0.160615	-0.60925
Peptide118	HFDTY[+80]HR	Q99959	PKP2	pY217	0.355485	-0.0663583	-0.159065	1.59325	-0.264492	-0.11526	4.53339	0.540567	0.592016	-0.838124	-0.577335	-0.135709	-0.220135	-0.691982	0.953082	-0.520374	-0.544776	-0.49375	0.157099	-0.559691	-0.386984	-0.374267	-0.53676	-0.521159	-0.487822	0.0805258	-0.342204	-0.720235	-0.229272	0.540692	-0.560357
Peptide119	HLLAPGPQDIY[+80]DVPPVR	P56945	BCAR1	pY249	0.0345607	-0.239123	-0.0791213	-0.339308	-0.297399	-0.362141	-0.163722	-0.258932	0.268284	-0.415311	-0.315056	-0.234695	-0.373114	-0.373722	5.21551	-0.250617	-0.390207	-0.188272	-0.295283	-0.252221	-0.198472	-0.267088	-0.0932336	0.906224	-0.268471	-0.271481	-0.21801	-0.15526	-0.0640091	0.146319	-0.206625
Peptide120	HPAGVY[+80]QVSGLHNK	Q9HBL0	TNS1	pY1254	0.448017	-0.0713515	-0.100883	0.100822	-0.671237	-1.001	0.281772	-0.687006	1.02978	-0.915084	-0.483412	-0.855092	-0.96153	-0.678465	-0.444677	1.96915	-0.962771	0.415181	-0.927148	-0.912542	1.4418	1.33194	0.488969	1.70536	-0.817586	-0.376145	-0.475191	0.825021	2.65143	-0.670766	-0.677357
Peptide121	HPDIY[+80]AVPIK	Q9UDY2	TJP2	pY1118	1.41232	0.248947	-0.37467	-0.680568	0.0888288	-1.01992	0.405218	0.355413	0.966445	-1.15456	-0.832224	3.49535	0.0781681	-0.472375	-0.471027	-0.571936	-0.93817	-0.191739	0.951182	-0.484304	2.44612	-0.766421	-0.133198	-0.264503	-0.465292	-0.372498	-0.065737	-0.78438	-0.487053	-0.199103	0.28169
Peptide122	HTDDEMT[+80]GY[+80]VATR	Q16539	MAPK14	pT180;pY182	0.662322	-0.757657	0.822355	-0.641652	-0.662364	-0.550014	1.07524	0.401953	1.36174	-1.24262	-1.00624	0.535129	-1.20429	0.388702	0.882441	-0.572097	-1.09268	-0.166687	-1.08937	-0.745593	0.984904	1.95259	2.45276	1.57949	-0.514402	-0.602887	-0.491647	-0.862212	0.136566	-0.440948	-0.592838
Peptide124	HYEDGYPGGSDNY[+80]GSLSR	O60716	CTNND1	pY228	0.843766	0.804288	-0.286038	-0.458634	-0.491742	-0.706168	0.521484	0.191182	4.35614	-0.717294	-0.642659	0.125822	-0.427381	-0.254814	1.95211	-0.542442	-0.812278	-0.602728	-0.312964	-0.485549	-0.282953	-0.45493	-0.216689	-0.0967688	0.728207	-0.0765257	-0.367398	-0.591084	-0.436838	0.0743685	-0.333486
Peptide126	IADPEHDHTGFLTEY[+80]VATR	P27361	MAPK3	pY204	4.71358	0.438684	-0.329447	-0.512303	-0.203345	-0.627476	0.246364	-0.347768	0.543068	-0.761675	-0.442219	0.573144	-0.609777	-0.70734	0.334114	-0.732435	-0.757577	-0.210939	0.985679	0.209169	0.365709	-0.453615	-0.0605813	0.193709	0.12477	-0.125972	-0.69797	-0.770237	-0.447486	0.455564	-0.385395
Peptide129	IEGVY[+80]AR	P18077	RPL35A	pY34	-0.329641	1.21725	-0.209971	-1.03198	1.1632	-0.0458869	2.69045	0.212691	-0.327657	-0.630584	-0.912638	-0.718885	-0.737225	-0.974363	-0.56279	0.328501	-0.619295	-0.956435	-0.222413	0.647028	2.56591	-0.923765	-0.518471	-0.698765	0.794887	0.663922	-0.28323	-0.0311711	-0.744619	1.71718	-0.521248
Peptide131	IFPLRPDY[+80]QEPSR	Q16832	DDR2	pY481	-0.648843	-0.734238	0.668853	0.0986815	-0.761955	-0.570137	-0.500433	-0.823081	1.07693	-0.809802	-0.233396	-0.742844	-0.697023	-0.67948	0.430222	3.6442	-0.605761	-0.238875	-0.0234233	-0.196567	0.91215	1.22007	0.137748	2.26986	-0.688882	-0.752814	-0.685116	0.215165	0.297467	-0.0185362	-0.560143
Peptide133	IGEGTY[+80]GVVYK	P24941	CDK2	pY15	0.194596	2.29851	-0.933015	-0.165567	0.60643	-0.233238	0.19717	0.54305	0.398607	-1.0579	-0.783849	-0.58346	2.34429	-0.0788267	-0.694359	-0.545547	-0.777606	-0.360623	-0.748579	-0.282828	0.0111711	-0.832087	-0.236401	-0.747584	2.95512	0.683935	-0.339113	-1.07354	-0.307242	1.02106	-0.472566
Peptide132	IGEGT[+80]Y[+80]GVVYK	P24941	CDK2	pT14;pY15	-0.846238	1.20348	-1.17131	-0.389928	0.791244	0.752291	0.416715	0.191956	0.109844	-0.602549	-0.856541	-0.955767	-0.151537	-0.376868	0.0412116	-1.10956	-1.11636	1.77012	-1.60919	-1.20764	0.07416	-0.377739	1.07419	-0.556558	2.07178	1.88064	0.38009	-0.817949	-0.62519	1.448	0.565204
Peptide134	IGTAEPDY[+80]GALYEGR	P19174	PLCG1	pY771	0.847075	0.189891	1.43976	0.133944	-0.151096	-0.804761	0.299793	0.025365	3.76524	-1.26538	-0.408795	0.00530555	-0.205676	-0.875874	-0.105307	-1.12892	-1.02386	-0.714843	-0.712775	-0.451892	0.0572866	-0.814128	1.15191	0.725981	0.315194	-0.223249	-0.580067	-1.19869	0.512358	1.1735	0.0227241
Peptide135	IIQLLDDY[+80]PK	P05388	RPLP0	pY24	0.448274	1.63545	-0.854979	-0.51466	3.06251	-0.143088	2.65343	-0.425949	-0.493848	0.986648	-0.0547333	-0.272593	-0.620607	-0.88867	-0.28229	-0.808554	-0.926416	-0.563487	-0.722908	-0.833109	0.0817139	-0.774403	0.000925947	-0.698358	0.929208	0.542608	0.74492	-0.923375	-0.439492	-0.074922	0.230746
Peptide137	IQNTGDY[+80]YDLYGGEK	Q06124	PTPN11	pY62	-0.00803225	1.85471	-0.937936	-0.470455	0.0690474	-0.687543	0.261183	1.33721	1.546	-0.215152	0.314726	0.574579	-0.500864	-0.156713	-0.661153	-1.15821	-1.25076	-0.561034	0.218182	-1.07927	0.0549919	-0.884705	-0.349312	-0.813059	3.09761	1.4744	-0.0838765	-1.27956	0.210102	-0.162513	0.24742
Peptide141	IYIDPFTY[+80]EDPNEAVR	P54762	EPHB1	pY600	2.57046	1.16503	-0.32224	-0.464444	-0.412391	-0.409417	-0.0636753	0.0988808	4.14197	-0.49416	-0.491211	-0.482205	-0.501997	-0.313818	-0.167384	-0.225855	-0.576617	-0.453871	-0.506487	-0.544922	0.0846966	-0.319033	-0.303389	-0.343535	-0.225219	0.965446	-0.387871	-0.496699	-0.518488	0.0237611	-0.025307
Peptide142	IYNGDY[+80]YR	P30530	AXL	pY702	-0.105762	-0.120692	0.387078	0.0932168	-0.318192	-0.06443	0.144375	-0.835505	2.67667	-1.22103	0.299331	-1.22345	-0.883887	-1.07997	0.969926	0.418133	-0.790188	-1.14226	-0.637838	-0.0211108	0.0358684	2.229	0.143964	2.1866	0.3632	0.178676	-0.901495	-0.944905	0.344168	0.797468	-0.97695
Peptide143	IYQY[+80]IQSR	Q9Y463	DYRK1B	pY273	0.608255	1.11873	-0.825557	-1.33935	-0.992072	-0.148084	1.16736	2.69281	0.631127	-1.76128	-0.539973	-1.01698	-0.648516	-0.0266632	0.985722	0.401908	-1.70536	-1.02995	-0.619105	0.170279	0.866447	-0.318275	0.250358	0.148788	0.935605	0.199353	-0.388473	-0.217111	0.170824	1.77354	-0.544364
Peptide144	KNPQEGLY[+80]NELQK	P20963	CD247	pY111	0.279851	-0.93339	2.10931	-0.767528	-0.228271	-0.300674	0.917323	1.71792	1.12872	-1.16735	-0.285191	-0.665582	-0.534214	-0.70753	0.426149	-0.303735	0.456662	-0.804912	-0.0203276	0.513232	0.162359	0.342919	0.330696	-0.608134	-0.888382	-0.961612	-0.311982	-0.585653	3.24615	-0.455109	-1.10172
Peptide145	KPTY[+80]DPVSEDQDPLSSDFKR	Q07912	TNK2	pY518	1.71112	0.0217154	1.62517	-0.761576	-0.727021	-1.04437	0.324972	-0.11645	2.99476	-1.26623	-0.78841	-0.684605	-1.07883	-0.730997	-0.426338	0.593502	-1.33416	-0.166305	-0.61414	-0.511419	0.981341	0.158733	0.554548	0.990781	0.415529	-0.382276	-0.290773	-0.791932	0.0437455	1.54897	-0.249059
Peptide146	LC[+57]DFGSASHVADNDITPY[+80]LVSR	Q13523	PRPF4B	pY849	1.13987	3.61109	-0.680349	-1.26751	0.286629	-0.833569	0.97314	0.145532	0.628199	-0.609154	-0.588026	-0.0398532	-1.08057	-0.413759	0.248855	0.409768	-1.31825	-0.825648	-1.05045	-0.560194	1.56208	-0.577798	-0.124645	1.07918	-0.410409	0.777828	0.237932	-0.545474	0.181021	-0.451567	0.0960942
Peptide147	LDNGGY[+80]YITTR	P07947	YES1	pY222	0.499635	-0.201012	0.843088	-1.09765	-0.50789	-0.760674	0.28933	0.0466604	2.02753	-1.64677	0.645113	-0.660232	-1.02422	-0.833545	0.744932	2.75296	-1.95571	-0.711215	0.378516	0.595092	0.889295	1.01189	0.3723	0.687603	-0.595372	-0.304359	-0.690053	-0.591873	0.548626	-0.0535027	-0.698498
Peptide150	LGEGTY[+80]ATVYK	Q00537	CDK17	pY203	4.43178	-0.25025	-0.171573	-0.306077	-0.311727	-0.342316	-0.281622	2.90311	-0.160734	-0.275931	-0.163675	-0.189754	-0.255046	-0.266124	-0.137214	-0.281887	-0.282703	-0.221472	-0.249694	-0.338566	-0.25512	-0.221815	-0.263246	-0.21773	-0.328422	-0.258175	-0.232674	-0.271159	-0.273062	-0.27641	-0.250712
Peptide151	LGLDY[+80]EER	Q99623	PHB2	pY128	0.11966	1.16947	-0.138569	-0.95605	1.92319	0.357331	2.28753	1.89397	-0.675429	-1.07615	-1.19556	0.255358	-0.671395	-0.736791	-1.01504	0.628694	0.0560379	-1.03437	0.666753	-0.244963	1.00648	-1.10123	0.0630761	-1.26211	1.11553	0.698397	-0.809032	-0.863866	-0.930306	0.206284	0.263088
Peptide152	LHEY[+80]NTQFQEK	P27986	PIK3R1	pY452	-0.772396	0.179735	-0.527806	-1.02622	-0.927364	-0.181047	-0.217914	-0.159782	1.15174	-0.940211	-0.666486	0.0710228	3.59997	0.171848	0.109796	-0.3871	0.0493427	-1.24796	1.33907	1.39334	0.482716	0.0652533	1.46505	0.0497321	-0.559119	-1.0622	-0.0558419	-1.37456	0.0467523	0.314732	-0.384101
Peptide153	LIEDNEY[+80]TAR	P06239	LCK	pY394	0.776627	-0.490417	1.40642	-0.038195	-0.197258	-0.532793	0.408339	0.212077	4.44799	-1.25551	-0.475277	-0.702307	-0.206946	-0.662497	0.614932	-0.255158	-0.413613	-0.795879	-0.124438	-0.536294	0.198496	-0.0616771	0.533168	0.286985	-0.624592	-0.352849	-0.526358	-0.628621	0.0657075	0.645538	-0.715602
Peptide154	LIKDDEY[+80]NPC[+57]QGSK	P09769	FGR	pY412	-0.588901	-0.491079	-0.338487	-0.357623	-0.287506	0.175262	-0.474388	-0.562597	0.246568	-0.493759	-0.327568	1.06294	0.826648	-0.245652	-0.522589	-0.314588	4.88856	0.0545047	0.168113	0.1911	-0.493749	-0.314665	-0.493177	-0.322865	0.227219	-0.548666	-0.547367	-0.140006	-0.575311	0.395854	0.203775
Peptide155	LIY[+80]LVPEK	Q9NZM3	ITSN2	pY553	0.62518	-0.023002	-0.146548	-0.0283714	2.13866	-0.734995	2.46319	0.373061	1.78182	-1.14813	-0.838142	-0.382059	-0.586567	-0.350512	0.22124	-0.856297	0.133044	-0.644034	-0.330444	-0.844078	-0.311932	-0.432488	-0.700431	-0.435786	1.47486	-0.194531	-0.673209	-0.904136	-0.0968384	2.29253	-0.841041
Peptide156	LLDDFDGTY[+80]ETQGGK	P21709	EPHA1	pY781	0.115355	0.687309	-0.474014	-0.499456	-0.24197	-0.619882	-0.255751	-0.336663	4.84809	-0.505957	-0.435166	-0.213879	-0.504692	0.404606	-0.457656	-0.188674	-0.413155	-0.211574	-0.615093	-0.34768	1.04929	0.218145	-0.440919	-0.444061	0.202534	0.32608	-0.353076	-0.397935	-0.534684	0.860562	-0.220022
Peptide158	LPSSPVY[+80]EDAASFK	Q14247	CTTN	pY421	2.61355	0.382419	-0.477942	0.232767	-0.31916	-0.863696	0.183376	-0.450486	3.64094	-1.00744	-0.402953	-0.406127	-0.750129	-0.777578	-0.469738	-0.367775	-0.702981	-0.305454	-0.626453	-0.540344	-0.342761	-0.297429	0.282572	0.899298	0.349295	-0.152697	-0.450166	-0.248003	0.742785	1.3178	-0.685503
Peptide159	LQQY[+80]IAPGMK	P54753	EPHB3	pY600	0.124864	3.52986	-0.518633	-0.283122	-0.205043	0.240799	-0.187217	-0.160577	-0.39611	-0.43959	-0.359812	-0.122398	1.36455	-0.538006	-0.550635	-0.0386636	-0.456679	-0.416561	-0.579571	-0.439317	-0.345477	-0.115473	-0.350604	-0.504807	-0.535113	3.38762	-0.423909	-0.457366	-0.607737	0.0377965	0.34693
Peptide160	LSLEGDHSTPPSAY[+80]GSVK	A6NMY6	ANXA2P2	pY24	0.856628	0.0543469	1.3463	-0.752164	-0.895024	-0.750091	0.704897	0.126149	2.05828	-0.820905	-0.760423	-0.486283	-0.6401	-0.664951	3.71613	-0.62533	-0.517977	-0.574168	-0.229754	-0.7286	-0.244455	0.614262	0.717879	0.906277	-0.0310363	-0.562074	-0.637626	-0.621866	-0.300471	0.0155114	-0.273357
Peptide161	LVNEAPVYSVY[+80]SK	O75886	STAM2	pY374	-0.209038	-0.14546	-0.165053	-0.261059	5.37076	-0.215399	-0.186005	-0.133379	0.12243	-0.253008	-0.243238	-0.141492	-0.150345	-0.202643	-0.196267	-0.235719	-0.207981	-0.208502	-0.0824481	-0.194088	-0.195639	-0.200091	-0.0414756	-0.0472178	-0.292102	-0.19637	-0.254253	-0.234007	-0.177658	-0.179089	-0.244161
Peptide166	LYDAY[+80]ELK	P08758	ANXA5	pY94	-0.72621	-0.545094	-0.434236	-0.378394	-0.843178	-0.566484	-0.150523	-0.481823	0.50731	-0.468755	0.035094	-0.482589	-0.128986	0.648169	-0.314997	4.39396	0.187278	-0.0144028	-0.00722185	-0.0856786	2.19165	0.240971	0.000379119	0.0341781	-0.669105	-0.745034	-0.100809	-0.0290811	0.322168	-0.60439	-0.784166
Peptide167	LYEEY[+80]TR	P27986	PIK3R1	pY470	-0.650704	-0.25932	-0.4179	-0.355375	-0.792362	-0.637278	-0.45163	-0.0535901	0.47253	-0.721279	-0.545731	-0.39876	4.55275	-0.211883	0.440454	0.48108	-0.491956	-0.886037	0.819931	1.18925	0.278843	0.0635086	1.02795	0.208841	-0.320184	-0.613954	-0.214891	-0.619836	-0.391048	-0.0443765	-0.457042
Peptide163	LY[+80]AVVTR	P07948	LYN	pY306	0.110081	-0.581567	3.55109	-0.641228	2.36383	-0.146644	0.438988	0.622747	1.93852	-1.00423	-0.836623	-0.481592	-0.852357	-0.595379	0.264145	-0.201929	-1.22526	-0.400163	-0.354804	-0.43481	0.212562	-0.494722	-0.132897	0.193253	0.414171	-0.19808	-0.478873	-0.700879	-0.481327	0.233618	-0.0996313
Peptide165	LY[+80]EEYTR	P27986	PIK3R1	pY467	-0.275168	0.0706648	-0.319218	-0.215138	-0.531711	-0.319854	-0.771101	0.267605	0.297799	-0.850352	0.178467	-0.964806	-0.652047	-0.494497	-0.640377	0.390671	-1.94397	-0.595273	2.75182	3.09782	1.52918	0.0698121	0.985896	-0.00305204	-0.0156292	-0.813159	0.0226813	-0.572477	0.047796	0.3176	-0.0499856
Peptide171	MAEAY[+80]SEIGMK	P20963	CD247	pY123	0.185799	-0.760464	0.820297	-0.442182	-0.130636	-0.861507	0.958556	2.35755	0.308457	-1.18018	-0.632815	-0.228601	-0.128321	-0.680476	0.0073464	-0.22719	-0.437083	-0.512044	-0.311514	0.108793	0.70839	1.73126	0.272347	-0.26032	-0.806393	-0.629355	-0.861072	-0.222162	3.38804	-0.528239	-1.00629
Peptide181	NLIY[+80]DNADNK	Q9Y446	PKP3	pY390	-0.484809	3.31699	-0.826912	-0.970503	-0.789728	-0.907744	-0.375407	0.747243	0.0376477	-0.462441	-0.680575	-0.538731	-0.154282	1.023	-0.712518	0.748175	0.278204	-0.755756	1.79063	-0.623131	0.317234	-0.453594	-0.598546	-1.00303	1.28099	1.05154	-0.154574	-0.778996	-1.0449	0.943849	0.780669
Peptide183	NPGNQAAY[+80]EHFETMK	P18206	VCL	pY692	-0.0292424	-0.581111	-0.754225	0.51295	-0.194494	-0.284935	-0.421289	-0.0888604	0.289451	-1.06894	-0.402581	0.32028	0.177107	-0.353099	1.08269	-0.281179	3.52407	-0.540358	1.42088	2.32616	-0.318104	0.824033	-0.341748	0.125975	-0.646978	-1.05983	-1.13628	-0.828397	-0.840252	0.140849	-0.572538
Peptide184	NPQEGLY[+80]NELQK	P20963	CD247	pY111	0.0195154	-0.717233	1.49238	-0.318839	-0.0163161	-0.670207	0.724327	1.69826	0.427982	-0.94818	0.501183	-1.25942	-0.704128	-0.624579	0.968921	-0.396383	0.613189	-1.13512	-0.503594	1.52431	0.133811	0.564339	0.409283	-0.525391	-0.840012	-1.03952	-0.111984	-0.324751	3.06749	-0.858364	-1.15097
Peptide186	NQETY[+80]ETLKHEKPPQ	P30273	FCER1G	pY76	-0.871095	-1.04915	1.25116	-0.533651	-0.278096	0.494402	0.366363	-0.668734	1.54921	-1.22891	-0.968339	0.805787	0.441186	-1.17839	0.807191	-0.598785	2.27007	-0.678615	0.635764	0.250088	-0.762474	0.206568	2.32574	-0.216953	-0.865081	-1.05857	-1.12723	-0.847899	0.271901	1.08321	0.17332
Peptide190	QADEEMTGY[+80]VATR	Q15759	MAPK11	pY182	-0.459809	-0.496174	-0.590047	-0.266638	0.128563	-0.606417	-0.402799	3.1805	0.100365	-1.13715	-0.618334	-0.977228	-0.608849	-0.365067	-0.221496	1.00876	-0.751426	-0.227662	0.653631	2.62981	0.450203	1.21501	0.828336	0.618406	-0.601952	-0.541819	-0.683649	-0.638665	0.908272	-0.660219	-0.866456
Peptide191	QADSEMTGY[+80]VVTR	P53778	MAPK12	pY185	-0.402254	-0.394352	0.404996	-0.641733	0.195242	-0.61941	0.160178	-0.751694	1.0213	-1.09077	-0.573591	-0.657202	-0.697681	-0.77418	0.703225	2.58674	-1.13826	-0.63444	0.362769	1.42432	0.863036	-0.285948	1.58436	2.19218	-0.703501	-0.773062	-0.81539	-0.615307	1.3623	-0.618795	-0.673093
Peptide193	QDVY[+80]GPQPQVR	O60716	CTNND1	pY257	1.18346	0.307255	-0.627881	-0.0160962	-0.32716	-0.790048	0.256019	0.258009	2.35181	-0.850504	-0.707083	0.385259	-0.545217	0.878706	3.92594	-0.474564	-0.868328	-0.76319	-0.337753	-0.405995	-0.111026	-0.671227	-0.462152	-0.130305	0.414723	-0.210092	-0.220956	-0.672508	-0.511448	0.268702	-0.526349
Peptide195	QEMMEY[+80]R	P17661	DES	pY324	-0.252113	-0.29901	0.885069	-0.327715	0.544988	-0.0685095	-0.570705	-0.540728	-0.219314	-0.412401	-0.376455	-0.526933	-0.234541	-0.368162	-0.489192	4.0308	-0.288509	0.13292	-0.345629	-0.162848	2.88394	0.517132	-0.513651	-0.350625	-0.519518	-0.499719	-0.569284	-0.386651	0.262876	-0.425188	-0.510325
Peptide199	QLLY[+80]SENK	P42685	FRK	pY132	0.709157	-0.179721	0.155788	-0.28391	1.24719	0.0999162	-0.601981	-0.830399	1.71248	-0.860768	-1.01909	0.944773	1.1979	0.574627	-0.435605	1.37755	-0.135508	-0.19442	-0.337443	1.02325	2.14347	-1.16588	-0.508963	-1.11014	0.0912093	-0.509747	-1.31051	-1.21394	-1.20159	1.639	-1.0167
Peptide202	QSPEDVY[+80]FSK	P29317	EPHA2	pY575	-0.486618	-0.192276	-0.412341	-0.562791	-0.511251	0.135982	-0.459426	0.695628	-0.0120248	-0.50173	-0.270328	0.0486941	-0.234635	-0.292691	-0.105909	-0.47347	-0.217247	-0.413378	-0.490759	-0.455974	-0.427955	-0.202926	0.715803	-0.250147	-0.178323	-0.138115	-0.426634	0.932917	4.95172	0.589521	-0.353315
Peptide203	QTLLPNDQLY[+80]QPLK	P09693	CD3G	pY160	-0.304111	-0.250293	-0.190095	-0.242748	-0.412722	0.794678	-0.247315	-0.301655	-0.215212	-0.221247	-0.247327	-0.166117	5.25106	-0.246633	0.2773	-0.242094	-0.232525	-0.122836	-0.242957	-0.277058	0.139735	-0.281794	-0.0649088	-0.1273	-0.174721	-0.265209	-0.404756	-0.156939	-0.301791	-0.278649	-0.243766
Peptide208	REEPEALY[+80]AAVNK	Q9NZM3	ITSN2	pY968	0.216699	-0.703088	0.818722	-1.07026	-0.420203	-0.749581	1.31425	-0.0420141	2.76279	-1.26065	1.63638	-0.220722	-0.95222	-0.96746	0.533725	-1.6784	0.267232	-0.482764	-0.4996	-0.99777	-0.708108	0.0403808	1.56008	0.697356	0.387813	-0.179409	-0.284973	-0.804117	1.30343	0.781436	-0.298955
Peptide210	RIEY[+80]IEAR	Q8WUW1	BRK1	pY63	0.809915	-0.0717959	-0.163147	-0.413805	1.17678	-0.694272	0.403406	0.885914	0.643004	-1.21561	-0.816263	0.00504764	-0.92871	0.129705	-1.34506	0.399123	3.50284	-0.40329	0.524816	1.56256	-0.0959234	-0.786284	-0.410647	-0.552701	-0.373687	-1.15218	-0.958117	-1.04497	0.330104	1.04116	0.0121042
Peptide213	RSDSASSEPVGIY[+80]QGFEK	Q05655	PRKCD	pY313	3.66599	0.637837	-0.246344	-0.842062	1.08221	-0.959222	0.332397	0.524721	1.49231	-0.970148	-0.936469	0.641363	-0.884985	-0.829976	0.71076	-0.424726	-0.776307	-0.343176	-0.466132	-0.981259	0.447575	-0.137814	-0.386207	-0.118969	0.511795	0.470612	-0.486089	-0.896586	-0.537712	1.33999	-0.633389
Peptide215	SAEEAPLY[+80]SK	Q99952	PTPN18	pY389	-0.8888	-1.04895	0.138799	0.231744	-1.01356	1.14432	0.559136	-0.88525	0.856745	-1.45958	-0.0553518	0.671181	0.652841	-0.930731	-0.461032	-0.606158	2.27956	-0.853232	1.33454	2.46528	-0.334204	1.2614	0.314864	0.368536	-0.635741	-1.3538	-1.07491	-0.437917	-0.119205	0.148277	-0.268806
Peptide217	SDSASSEPVGIY[+80]QGFEK	Q05655	PRKCD	pY313	3.88301	0.49909	-0.0327994	-0.636056	1.14525	-0.832373	0.388149	0.325287	2.08937	-0.906359	-0.849092	0.427959	-0.618479	-0.716398	0.320336	0.125216	-0.723384	-0.604769	-0.0563739	-0.692912	0.670321	-0.446213	-0.582333	-0.288202	0.0748211	0.059617	-0.650222	-0.809987	-0.637414	0.730791	-0.655855
Peptide218	SDVY[+80]SDLNTQRPYYK	O43914	TYROBP	pY102	-1.00693	-1.41644	0.369478	-0.360755	-0.740671	0.986086	-0.0467873	-0.924458	1.40739	-0.943716	-0.388426	1.78627	1.15425	-0.933323	0.497743	-0.820193	2.49499	-0.27799	0.605518	0.162413	-1.03917	0.842868	0.622459	-0.283826	-0.393053	-1.09186	-0.993287	-0.802829	-0.616577	1.50782	0.643006
Peptide219	SEDIY[+80]ADPAAYVMR	Q9Y2H5	PLEKHA6	pY492	3.49721	0.730249	-0.227747	-0.639119	1.69437	-0.829066	0.867077	0.448965	1.59965	-0.905436	-0.77023	0.379842	-0.772998	-0.717962	-0.150304	-0.801288	-0.885994	-0.682367	-0.620229	-0.869498	0.422535	-0.72768	-0.0458402	-0.172937	0.745568	0.132353	-0.506783	-0.827223	-0.745701	1.01846	0.362114
Peptide221	SFLDSGY[+80]R	P18206	VCL	pY822	-0.142955	0.188328	-0.532083	-0.190629	-0.578679	-0.572492	-0.0245917	-0.425627	-0.216425	-0.626376	-0.0634001	-0.330358	-0.594619	-0.0310955	0.14241	-0.0564733	5.1683	-0.346293	-0.3507	0.0713602	-0.295128	-0.141388	0.0621994	0.457573	0.0319838	-0.11339	0.190475	-0.401985	-0.447792	0.352835	-0.182985
Peptide222	SGDLPY[+80]DGR	Q86X29	LSR	pY586	-0.259585	2.04099	-0.10931	0.157316	-0.662246	-0.817187	-0.816051	0.0366748	1.45182	-0.200208	-0.723095	-0.60764	2.37245	1.13493	-0.066483	-0.511707	-0.390729	-0.0347085	-1.0141	-0.500953	2.07656	-0.382046	-0.753185	-1.09494	-0.24545	1.7826	-0.758586	-0.954882	-0.986483	0.537298	0.298941
Peptide223	SGQSLTVPESTY[+80]TSIQGDPQR	Q9NWQ8	PAG1	pY341	-0.701069	-0.864519	0.981787	-0.791437	-0.30529	0.0417458	-0.618088	-0.803915	3.31881	-1.01544	-0.839822	0.890476	0.673388	-0.668689	0.0839271	-0.598719	2.13518	0.10343	0.232533	-0.56826	-0.45514	-0.182319	0.597655	0.204786	-0.17208	-0.884264	-0.736364	-0.657016	-0.560057	1.86108	0.297683
Peptide225	SLDNGGYY[+80]ISPR	P07948	LYN	pY194	0.0264479	-1.09036	1.47854	-0.689549	3.0108	-0.475172	0.169559	-0.555262	2.63934	-1.40949	-0.616096	-0.60364	-0.416722	-0.188348	0.929079	0.0922002	0.191259	-0.246108	0.59355	-0.0613741	0.315383	-0.423005	-0.394635	-0.256214	0.750526	-0.666728	-0.945776	-1.028	-0.552581	1.05881	-0.636436
Peptide226	SLDNNY[+80]STPNER	O60716	CTNND1	pY904	2.25087	0.423572	-0.299744	0.291268	-0.493818	-0.79044	0.418008	-0.319463	4.23482	-0.847042	-0.705975	0.0105908	-0.0223499	0.0225822	0.601907	-0.689091	-0.58832	-0.744682	-0.48379	-0.555542	0.439188	-0.326168	-0.268991	-0.0413243	0.359379	0.152228	-0.475625	-0.792326	-0.557979	0.280892	-0.482633
Peptide227	SLEATDSAFDNPDY[+80]WHSR	P21860	ERBB3	pY1328	0.361944	1.35766	-0.0557255	-0.282652	1.11433	1.78215	1.08452	0.420306	3.43035	-0.921451	-0.634599	-0.55751	-0.536486	-0.672476	-0.736696	-0.257774	-0.761485	-0.538118	-0.565112	-0.613313	0.655425	-0.725587	-0.896371	-0.402756	0.527577	0.917753	-0.812691	-0.845775	-0.667292	0.640667	-0.808812
Peptide230	SLYASSPGGVY[+80]ATR	P08670	VIM	pY61	-0.587786	-0.712328	0.503423	-0.433571	-0.467639	-0.548822	0.0749326	-0.257402	0.772162	-1.13306	-0.8825	1.6355	-0.402174	-1.04477	1.01402	-0.848562	-1.11932	-0.0697365	1.63475	0.829833	-0.465548	0.213107	2.07383	2.91877	-0.565941	-0.96269	-0.669153	-0.484939	-0.0196567	0.273996	-0.268734
Peptide228	SLY[+80]HDISGDTSGDYR	P50995	ANXA11	pY482	-0.27018	-0.234045	-0.297597	-0.340144	-0.35356	-0.153641	-0.108033	-0.283817	-0.110532	-0.402898	-0.371074	-0.0545598	1.35243	-0.13149	-0.308464	0.217142	5.0951	-0.232167	0.144799	-0.0211907	-0.0092071	-0.130071	-0.397356	-0.383926	-0.145236	-0.408599	-0.392151	-0.33002	-0.404651	-0.203715	-0.33114
Peptide229	SLY[+80]SMIK	P08133	ANXA6	pY302	-0.854367	-0.81484	0.217372	-0.537173	-0.931586	-0.350533	-0.417442	-0.47502	-0.27448	-1.11303	-0.8605	-0.196452	0.887482	-0.0206666	-0.198581	2.74041	2.66864	0.100603	-0.385788	0.898286	0.731188	1.1898	-0.0335301	0.0708102	-0.618075	-1.14048	-0.528608	-0.515129	1.8833	-0.591628	-0.52998
Peptide232	SNHY[+80]DPEEDEEYYR	Q07157	TJP1	pY1346	-0.717636	0.85437	2.5981	-0.681431	-0.409613	-0.734631	-0.602689	1.40902	-0.710429	-0.426687	-0.719964	-0.737522	-0.714068	-0.630613	-0.119704	-0.603317	-0.697612	0.308951	-0.709406	-0.701386	-0.0322647	-0.541392	-0.720473	1.87284	0.294548	-0.579946	1.42472	-0.204592	1.72409	-0.459327	1.96806
Peptide233	SNHY[+80]DPEEDEEYYRK	Q07157	TJP1	pY1346	1.04921	1.19674	0.0355067	-0.671178	-0.0666718	-0.472119	0.492536	-0.637598	4.58052	-0.358681	-0.550623	-0.402224	-0.446103	-0.433338	-0.274515	-0.414878	-0.115493	-0.610198	-0.521654	-0.608182	0.386135	-0.293062	-0.182411	-0.630334	0.957925	0.752523	-0.207277	-0.618495	-0.3055	-0.183202	-0.44736
Peptide237	SQSSHSY[+80]DDSTLPLIDR	O60716	CTNND1	pY865	2.29918	0.639541	-0.930409	-0.351896	-0.568081	-0.267305	1.04294	-0.103345	2.77467	-1.30427	-1.25796	0.310222	-0.190289	0.313497	1.47705	-0.82251	-0.719852	-0.467767	-0.88656	-0.757497	0.468299	-0.521234	-0.770729	-0.720462	1.02508	1.20319	0.251976	-0.0986903	-1.21171	0.0649528	0.0799631
Peptide238	SREYDQLY[+80]EEYTR	O00459	PIK3R2	pY464	0.174631	1.70898	-0.609999	-0.707253	1.18974	-0.0655052	1.48979	2.37141	1.2888	-0.870138	-0.989674	2.0346	-0.931178	-0.735875	-0.580376	-0.397563	-1.24721	-0.526385	-0.200903	-0.742763	0.707254	-0.54845	-0.285564	-0.370498	1.40614	0.244096	-0.628501	-1.06647	-0.220395	-0.529305	-0.361427
Peptide242	STGPGASLGTGY[+80]DR	O15551	CLDN3	pY214	-0.39528	3.24462	0.660485	-0.457005	-0.52034	-0.505344	-0.551015	-0.391643	1.08923	-0.195661	-0.463584	-0.215149	0.0464413	1.96541	-0.61186	-0.334843	-0.444887	-0.485318	-0.747608	-0.425349	0.276283	-0.236508	-0.663033	-0.597258	-0.323296	2.94844	-0.527056	-0.47428	-0.669385	0.00606878	-0.00128264
Peptide246	SYSPY[+80]DMLESIR	A6NMY6	ANXA2P2	pY238	0.259821	-0.110565	-0.104797	-0.213498	-0.0922435	-0.35953	-0.0683353	-0.0484569	-0.109001	-0.428621	-0.324576	-0.229678	-0.314668	-0.243955	0.283952	-0.327469	5.31641	-0.204365	-0.150297	-0.266523	-0.157984	-0.188614	-0.164465	0.0715865	-0.22978	-0.226654	-0.306248	-0.372774	-0.249393	-0.0952301	-0.344043
Peptide253	TEELIY[+80]LSQK	Q12774	ARHGEF5	pY1370	-0.240193	-0.148947	-0.314038	-0.303212	-0.233177	-0.265921	-0.12542	-0.158243	0.443168	-0.264801	-0.304325	-0.0228407	5.32595	-0.114534	-0.271727	0.130891	-0.129248	-0.315647	-0.210261	-0.224664	-0.0682776	-0.275339	-0.28889	-0.191382	-0.217335	-0.165988	-0.124005	-0.273292	-0.290937	-0.24673	-0.110639
Peptide254	TGVAGEDMQDNSGTY[+80]GK	Q05655	PRKCD	pY334	3.47562	-0.114897	0.145725	-0.147765	0.756642	-0.465909	0.344887	0.244734	3.21903	-0.766257	-0.648994	0.415464	-0.0359775	-0.657943	-0.296691	-0.321142	-0.776548	-0.605947	0.892469	-0.389142	-0.180231	-0.433912	-0.45774	-0.478598	-0.167929	-0.559032	-0.593549	-0.731133	-0.65885	0.49068	-0.497059
Peptide256	TLDNGGFY[+80]ISPR	P08631	HCK	pY209	-0.876301	-1.11973	-0.583364	-0.59635	-0.597134	1.05273	-0.267416	-0.643433	0.232779	-1.51335	-0.812377	-0.354238	0.617148	-0.462456	-0.0176286	-0.986658	2.52893	0.278624	1.94497	1.8109	-0.560396	-0.287448	-0.306551	0.0348987	1.12824	-1.18413	-0.223816	-0.648484	0.536417	1.77861	0.0970084
Peptide257	TMQFEPSTMVY[+80]DAC[+57]R	Q9Y490	TLN1	pY26	-0.0958324	-0.446494	0.507365	0.0348702	0.815095	-1.37498	1.18485	-0.476677	0.325249	-1.06092	-0.945703	0.219287	-0.983102	0.213879	0.0823357	0.7986	-1.68427	3.27033	-1.29861	-0.799332	1.86047	0.297255	0.467439	0.540036	-0.559463	-0.355088	-0.55439	-0.455038	0.539119	0.386876	-0.453151
Peptide260	TRDQY[+80]LMWLTQK	P27986	PIK3R1	pY580	0.783381	-0.220647	-0.500001	4.93504	0.0919103	-0.415502	-0.417293	-0.291725	0.0566139	-0.55919	-0.54016	-0.348582	0.170959	-0.451535	0.954997	-0.102851	-0.737324	0.129569	-0.535283	-0.28405	-0.233433	-0.274164	0.559063	0.13185	-0.424994	-0.325315	-0.443891	-0.587455	0.0462099	-0.379729	0.213527
Peptide262	TTAVEIDY[+80]DSLK	O15117	FYB1	pY571	-0.403804	-1.02074	1.50316	-0.978649	-0.553687	0.817799	0.36534	-1.21649	1.44133	-1.41773	-0.678979	0.125939	-0.224804	-1.22064	0.853909	-0.651054	1.08544	-0.650251	-0.99828	-0.00790096	-0.699498	0.445465	0.655967	-0.0779166	0.630934	-1.04424	0.725241	-0.920685	1.74313	2.46968	-0.0979926
Peptide268	TYVDPHTY[+80]EDPNQAVLK	P29317	EPHA2	pY594	1.55762	0.852563	0.0148295	-0.880378	0.497357	-0.69022	-0.239372	0.233876	4.1921	-0.595754	-0.075837	-0.574611	-0.286912	-0.596793	0.872658	-0.190726	-0.740883	-0.701462	-0.819685	-0.842791	0.687528	0.0841782	-0.0915943	-0.408036	-0.563557	0.846434	-0.43167	-0.619753	-0.831026	0.560593	-0.218675
Peptide265	TY[+80]DMLK	Q99959	PKP2	pY108	-0.067321	-0.282321	-0.311844	0.571131	-0.137266	-0.188127	3.25644	0.210274	0.964746	-0.83839	-0.748659	-0.283786	0.413092	-0.371156	3.45542	-0.629647	-0.462789	-0.626619	0.275631	-0.594308	-0.00429104	-0.496826	0.064457	-0.706371	-0.360951	-0.187112	-0.693696	-0.806979	-0.370973	0.548258	-0.590019
Peptide267	TY[+80]VDPHTYEDPNQAVLK	P29317	EPHA2	pY588	1.36967	0.446483	0.390701	0.618541	0.343342	1.9782	-0.271755	-0.632655	3.22468	-0.341552	-0.476723	-0.91014	-0.531511	-0.396365	0.108617	-0.387784	-0.904769	-0.975558	-0.371531	-1.19721	2.2216	-0.166218	-0.611473	-0.30448	-0.193887	0.190856	-0.220763	-0.56506	-0.771872	0.253927	-0.915317
Peptide269	VADPDHDHTGFLT[+80]EY[+80]VATR	P28482	MAPK1	pT185;pY187	-0.0997046	-0.293899	0.979146	-0.231447	-0.488082	-0.461755	-0.19092	1.48621	0.726393	-0.554819	-0.331573	-0.472083	-0.554982	-0.547666	0.57753	-0.475658	-0.550837	-0.451822	-0.480675	0.399149	0.146684	-4.9e-05	4.65241	0.139776	-0.393916	-0.446006	-0.567305	-0.427433	-0.253801	-0.367086	-0.465782
Peptide273	VDLGSEVY[+80]R	P50479	PDLIM4	pY191	-0.0170479	-0.679182	0.348303	0.227947	-0.838944	-1.07707	-0.32277	-0.401545	3.85247	-0.627945	-0.198732	0.352082	-0.467996	-0.538317	0.223204	1.16818	-0.467625	-0.38609	-0.154673	-0.0837384	-0.516831	0.551263	0.611921	2.45396	-0.134255	-0.883756	-0.718498	0.00937577	0.236807	-0.859636	-0.660865
Peptide275	VDY[+80]VVVDQQK	Q13480	GAB1	pY659	-0.0544345	0.508273	-0.19985	-0.443367	-0.39054	-0.54802	0.387134	-0.162828	4.95158	-0.536915	-0.489761	-0.365794	-0.459321	-0.375716	-0.464216	0.0229521	-0.373381	-0.465757	-0.211071	-0.181092	1.19501	-0.053124	-0.416538	-0.135831	0.488184	0.155832	-0.444417	-0.434991	-0.252478	0.277745	-0.52726
Peptide276	VEFGVY[+80]ESGPR	Q6ZUJ8	PIK3AP1	pY694	-0.922256	-0.849602	-0.0325514	-0.774077	-0.461094	-0.0459174	-0.622879	-0.722731	-0.206429	-0.885816	-0.425962	3.49038	1.55085	-0.270332	-0.744284	-0.572341	1.77837	0.0136631	0.555891	1.66929	0.120639	-0.451613	0.282994	-0.0395031	-0.317667	-0.042138	-0.895942	-0.244344	-0.870261	-0.378464	1.31412
Peptide277	VENC[+57]PDELY[+80]DIMK	P07948	LYN	pY473	-0.705518	-0.733122	1.53523	-0.583729	3.6329	1.39087	-0.0734725	-0.322671	0.885617	-1.11298	-0.761064	-0.241266	0.0990806	-0.271283	0.627326	-0.652779	0.730589	-0.685655	0.393567	1.40507	-0.443869	0.226807	-0.194735	-0.715132	-0.0822422	-1.05596	-1.04986	-1.04477	-0.143834	0.2842	-0.33731
Peptide278	VGEEEHVY[+80]SFPNK	P49023	PXN	pY118	0.400634	-0.235494	0.139909	0.26662	-0.409324	-0.422427	0.206877	-0.309377	4.81697	-1.05938	-0.500352	-0.576416	-0.657266	-0.340512	0.425592	-0.514884	-0.131536	-0.58485	-0.360447	-0.220438	-0.191328	-0.0558734	-0.265655	0.810947	-0.144223	-0.491288	-0.269042	-0.163749	0.36129	1.073	-0.597973
Peptide279	VGFQY[+80]EGTYK	P11413	G6PD	pY503	-0.893267	-0.26262	-0.668448	-0.63741	-0.492342	-0.0182202	-0.150813	-0.866711	-0.187692	-1.03595	-0.513586	0.129325	0.149212	0.515265	-0.196124	-0.463987	4.4861	-0.0926737	0.65845	1.19156	-0.331492	-0.404266	0.0138169	-0.28029	1.02457	-0.634158	-0.382404	-0.461413	0.523614	0.800065	-0.518114
Peptide283	VIEDNEY[+80]TAR	P07948	LYN	pY397	-0.581268	-0.848464	1.22343	-0.370729	-0.102045	0.192174	-0.637077	-0.753599	2.72878	-0.890193	-0.617078	0.553307	0.82784	-0.503011	-0.302374	-0.390966	3.55337	-0.213607	0.529248	0.431925	-0.443824	-0.238158	0.265154	-0.290364	-0.268484	-0.82556	-0.772436	-0.637975	-0.767934	0.444683	-0.294759
Peptide284	VIY[+80]DFIEK	O00401	WASL	pY256	0.56223	0.029545	0.416405	0.0636221	-0.730238	-1.04555	0.1739	-0.0261869	4.34514	-1.27872	-0.451413	-0.290137	-0.769651	-0.172804	-0.27634	0.569246	-0.496271	-0.488559	-0.172049	0.0661558	0.616179	-0.0443066	0.804846	0.657926	0.914929	-0.808824	-0.937221	-0.583952	0.105911	0.342468	-1.09629
Peptide285	VLEDDPEAAY[+80]TTR	P54764	EPHA4	pY779	0.0709876	-0.192336	-0.190305	-0.186653	-0.21151	-0.21104	0.0104386	5.37662	-0.081638	-0.228796	-0.210953	-0.218858	-0.200408	-0.224645	-0.164277	-0.183765	-0.182723	-0.213926	-0.204952	-0.205078	-0.197477	-0.179383	-0.159067	-0.189277	-0.208733	-0.204569	-0.218262	-0.210216	-0.204477	-0.156801	-0.217926
Peptide286	VLEDDPEATY[+80]TTSGGK	P29317	EPHA2	pY772	0.817576	0.363003	-0.161248	-0.269676	0.240594	-0.310662	-0.170551	-0.140371	4.65803	-0.832957	-0.31052	-0.579073	0.0971644	-0.370154	0.633761	-0.447549	0.205164	-0.859505	-0.825813	-0.522391	0.339965	0.382299	-0.165999	-0.362117	-0.159127	0.471181	-0.676288	-0.675863	-0.906062	0.991034	-0.453842
Peptide287	VQIY[+80]HNPTANSFR	P50552	VASP	pY39	1.36088	1.51582	-0.472551	-0.888951	2.44455	-0.548674	1.19641	0.393541	0.89762	-1.38172	0.0337982	-0.329908	-1.28072	-1.43735	-0.819262	1.68897	-1.80551	-0.737369	0.0706221	-0.0622047	0.541855	-0.149839	-0.456047	-0.247206	0.986088	-0.12007	0.158207	-0.650663	-0.500771	0.872484	-0.272042
Peptide288	VSEKPSADY[+80]VLSVR	Q13882	PTK6	pY114	0.614575	0.618984	-0.0232261	-1.30213	0.790516	-1.23348	1.73728	-0.489316	0.023957	-1.06529	-1.06708	-0.0816077	-0.999385	0.644953	1.25472	-0.570369	-0.550206	0.0315929	-0.989501	-1.33377	0.0915082	-0.341505	-0.936333	0.304282	-0.262993	1.51272	0.440654	0.325593	-0.608694	3.02824	0.435315
Peptide289	VTIADDY[+80]SDPFDAK	Q15464	SHB	pY246	2.53977	0.152252	-0.461763	-0.459806	0.136599	-0.604804	1.86863	-0.200425	3.47186	-0.676445	-0.617215	-0.0163112	0.242541	-0.568139	0.0211669	-0.784249	-0.524868	-0.273611	-0.665465	-0.262775	1.31941	-0.0807027	-0.601416	-0.546652	-0.340849	0.0882326	-0.752526	-0.706429	-0.666616	0.427671	-0.457068
Peptide292	VVY[+80]SAPR	O15551	CLDN3	pY198	0.479404	2.46385	1.22577	-0.464993	-0.572646	-0.683372	-0.403834	-0.220093	2.80928	-0.295291	-0.597951	-0.172701	-0.45306	1.08341	-0.443891	-0.336716	-0.724133	-0.416426	-0.61666	-0.544431	0.699863	-0.360678	-0.572799	-0.637497	-0.573656	2.57709	-0.537118	-0.605999	-0.691264	-0.20289	-0.210561
Peptide299	VYTY[+80]IQSR	Q92630	DYRK2	pY382	0.98157	-0.445009	-0.518419	-0.325432	2.01071	0.574605	-0.392431	2.08195	1.95216	-0.721658	0.326678	-0.787008	-0.239847	-0.710942	0.741873	1.45472	-0.471294	-1.1525	0.486038	0.105275	-0.18821	1.01562	-0.500447	-0.421202	-0.124137	-0.11797	-1.03642	-1.84291	-1.11671	0.711494	-1.33014
Peptide302	WDTGENPIY[+80]K	P05556	ITGB1	pY783	-0.468588	0.996352	0.182177	-0.0467528	-0.364676	-0.491323	-0.066716	-0.854496	3.96253	-0.997928	-0.493749	-0.335311	0.247897	-0.522105	0.0707612	0.947684	-0.804563	-0.828784	-0.36019	-0.433282	0.404506	0.613002	0.207401	1.6348	-0.965668	1.14565	-1.01536	-0.765628	-0.737545	0.192067	-0.052174
Peptide303	WTAPEAALY[+80]GR	P07947	YES1	pY446	-0.300782	-0.154593	0.700128	-0.222618	0.00829262	-0.192546	0.207431	0.0735091	1.85063	-0.169318	-0.171374	-0.287844	-0.0137474	0.0165795	4.69678	-0.662948	-0.743938	-0.611146	-0.467977	-0.25636	-0.054919	0.105277	-0.334718	-0.349818	-0.78769	-0.412355	-0.654013	-0.604875	-0.341801	-0.0421464	0.178901
Peptide329	YC[+57]RPESQEHPEADPGSAAPY[+80]LK	P40763	STAT3	pY705	-0.349835	-0.947915	-0.48948	-0.57419	1.47485	-0.691104	0.819064	2.12101	2.07782	-0.849738	-1.16488	-0.502603	-0.691606	1.26626	1.30114	-0.396209	0.915381	-0.225978	0.911939	0.953322	-0.172982	0.697731	-0.222519	0.453029	-0.991133	-1.30132	-0.692279	-1.39368	-0.306253	0.151848	-1.17969
Peptide331	YHGHSMSDPGVSY[+80]R	P08559	PDHA1	pY301	-0.637935	-0.645721	-0.645236	-0.958134	-0.0603736	0.0574456	0.237844	-0.127585	0.149608	-0.851548	-0.809526	-0.281338	-0.0924176	-0.0716434	-0.169877	0.14871	0.0873002	0.441278	-0.00971285	0.641356	0.631948	1.46929	0.503137	0.014685	-0.679797	-0.761914	-0.864473	-0.341194	4.51999	-0.2835	-0.610667
Peptide332	YIEDEDYY[+80]KASVTR	Q14289	PTK2B	pY580	3.20578	-0.336648	0.756874	-0.853091	1.80708	0.475484	0.389991	1.02095	0.11692	-1.25831	-0.695478	-0.318768	-0.54014	-0.208029	0.392942	-0.543566	-1.4429	-0.476733	0.757903	0.409529	-0.159658	-0.920535	1.62051	0.514042	-0.317346	-1.1915	-0.487331	-1.00212	0.535184	-0.554172	-0.696854
Peptide336	YTEFY[+80]HVPTHSDASK	Q96HC4	PDLIM5	pY251	0.195918	-0.517956	-0.512792	0.0399744	-0.712178	-1.09506	0.178841	-0.298996	0.913196	-1.10868	-0.485504	-0.515381	-0.90563	-0.626345	0.499825	-0.916572	-0.497416	-0.372354	-0.213202	-0.16575	-0.158273	0.399561	3.20081	3.2277	0.736018	-0.30458	-0.276103	-0.586393	0.109468	0.565421	0.202429
Peptide338	YVDSEGHLY[+80]TVPIR	Q03135	CAV1	pY14	0.0382671	-0.493522	0.249623	-0.408888	-0.445822	-0.404569	-0.353774	-0.518566	0.729926	-0.587503	0.0271961	-0.559111	-0.570209	-0.465171	0.174892	4.77266	-0.469694	-0.265599	-0.36066	-0.413914	0.739503	1.00201	-0.12684	0.897827	-0.504167	-0.494903	-0.473051	0.311787	-0.122779	-0.360381	-0.544574
Peptide339	YVLDDEY[+80]TSSVGSK	Q06187	BTK	pY551	-0.734062	-0.599429	3.4618	-0.73268	-0.427168	-0.221971	-0.0813767	-0.636971	0.339023	-0.575239	-0.410773	2.50166	0.29246	-0.460618	-0.502835	-0.280678	2.56658	-0.175357	-0.0185762	0.0556327	-0.0413683	-0.134971	-0.0846363	-0.250584	-0.67094	-0.717228	-0.625982	-0.258382	-0.475077	-0.236293	0.136035
Peptide340	YYGY[+80]TGAFR	P02788	LTF	pY547	-0.938905	-0.505605	-0.529251	-0.383	-0.360307	0.507336	-0.207051	-0.673453	-0.595702	-0.232981	-0.283129	1.0135	-0.0962253	-0.541869	-0.711337	-0.262083	-0.627395	-0.186022	-0.31548	1.09951	-0.373086	-0.439116	-0.635873	-0.429423	3.56568	-0.744898	0.953113	0.0177526	-0.690652	0.982981	2.62298
Peptide317	Y[+80]QQPFEDFR	P19174	PLCG1	pY1253	1.79878	2.03671	0.355987	-0.434018	0.523409	-1.63469	0.644385	0.123333	-0.224252	-0.695172	-0.770133	-0.746643	0.65073	-1.10237	-0.520058	-0.00877392	-0.673288	1.07116	0.0877278	-0.108085	1.21025	-0.963888	-1.71463	-0.674588	1.34376	0.537328	-0.515474	-0.412227	-1.5141	1.60484	0.723993

## Sheet: Table 6.2
Table 6.2	L:H ratios of all peptides identified in at least half of all tumors (expanded matrix).
Light/Heavy (L/H) ratios for all peptides in expanded matrix.
Blanks indicate an unquantifiable peptide
					L/H ratios
Peptide#	Modified Sequence	UniProt ID	Gene ID	Tyr Phosphosite	Tumor 1	Tumor 2	Tumor 3	Tumor 4	Tumor 5	Tumor 6	Tumor 7	Tumor 8	Tumor 9	Tumor 10	Tumor 11	Tumor 12	Tumor 13	Tumor 14	Tumor 15	Tumor 16	Tumor 17	Tumor 18	Tumor 19	Tumor 20	Tumor 21	Tumor 22	Tumor 23	Tumor 24	Tumor 25	Tumor 26	Tumor 27	Tumor 28	Tumor 29	Tumor 30	Tumor 31		Modifications key
Peptide62	ELPPDQAEY[+80]C[+57]IAR	P12814	ACTN1	pY859	0.000699886	0.000738244		0.0018105	0.000417352		0.000727473	0.00186094	0.00102106	0.00063221	0.000578316	0.000695064		0.000570696	0.00193357	0.000952869	0.0156029	0.000485628	0.000936689	0.00332397	0.00023903	0.00103637	0.000788802	0.00115194	0.000834257	0.0003557	0.000633218	0.000461742	0.00041081	0.000789004			Y[+80] = Tyrosine phosphorylation
Peptide69	EVPIY[+80]ANR	Q13443	ADAM9	pY769	0.00204263	0.00167052	0.0087314	0.00138864	0.00235705	0.000755418	0.00244293	0.00132341	0.00305624	0.000467315	0.00108365	0.00122509	0.00106081	0.00293062	0.00211801	0.00222358	0.000783371	0.0011194	0.00183478	0.000756015	0.00162961	0.00118685	0.00163263	0.00162454	0.000983453	0.00174534	0.000484351	0.000820786	0.000666291	0.00332662	0.00116854		T[+80] = Threonine phosphorylation
Peptide76	FAVPTY[+80]AAK	Q13443	ADAM9	pY778	0.00166214	0.00216594	0.021853	0.0025875	0.00424337	0.00198657	0.00247948	0.00234775	0.00263523	0.000956407	0.00135218	0.00117867	0.00264604	0.00450663	0.00140162	0.00226443	0.00190319	0.00182098	0.00126148	0.00123959	0.002149	0.00158793	0.00188845	0.00110916	0.00157198	0.00226057	0.000809616	0.00105083	0.00076368	0.00736995	0.00210133		S[+80] = Serine phosphorylation
Peptide61	ELGEY[+80]GFHEYTEVK	P00352	ALDH1A1	pY481					0.000586783	0.000246355	0.000313834	0.00058102		0.000270759	0.000229554	0.000230371	0.000320675	0.000212488			0.000657886		0.000243913	0.000251979	0.000590877	0.000411908	0.000784256		0.000416462	0.000978451	0.000297652		0.000598553		0.000732114		C[+57] = Carboxyamidomethylcysteine
Peptide170	LYSNAY[+80]LNDLAGC[+57]IK	P00352	ALDH1A1	pY119						0.000131844	0.000440703	0.000305971	0.000506075		0.000142722	0.000260627		0.000363887		0.00128837	0.000273828		0.000368258	0.000808923	0.000433257	0.000401184	0.00360664		0.000422026				0.0002736
Peptide192	QAWFIENEEQEY[+80]VQTVK	P04083	ANXA1	pY21						0.0393912	0.026488			0.00675034	0.00548613	0.0493922	0.0449324	0.00999247		0.0216255	0.1525		0.0332176	0.0528368	0.0758012	0.0304682	0.108101		0.0160992				0.0264965		0.0265056
Peptide228	SLY[+80]HDISGDTSGDYR	P50995	ANXA11	pY482	0.000454383	0.000508408	0.000413395	0.000349784	0.000329726	0.000628617	0.000696803	0.000433996	0.000693068	0.000255963	0.000303541	0.000776749	0.00288027	0.000661733	0.000397147	0.00118296	0.00847578	0.000511216	0.0010748	0.000826637	0.000844554	0.000663855	0.000264249	0.000284327	0.000641182	0.00024744	0.000272031	0.00036492	0.000253341	0.000553753	0.000363245
Peptide2	AEDGSVIDY[+80]ELIDQDAR	P07355	ANXA2	pY188	0.00160002	0.000104522	0.000525526	0.000358654	0.000530426	7.70727e-05	0.000839631	0.000619463	0.000957292	8.2046e-05	0.000195034	0.000333836	0.00011293	0.000159873	0.00078966	0.000369615	0.000778112	0.000259083	0.000269382	0.000269561	0.000421943	0.00052289	0.000474995	0.00112334	0.000228734	0.000400234	0.000296684	0.000163917	0.000470463	0.000588413	0.000367091
Peptide20	AY[+80]TNFDAER	A6NMY6	ANXA2P2	pY30	0.0121258	0.0510319	0.115761	0.00692813	0.0124267	0.00221211	0.0142964	0.0908449	0.00788577	0.0101059	0.00367701	0.00445897	0.00353624	0.00679043	0.0240537	0.00638338	0.00405034	0.0436211	0.00833936	0.00330925	0.0253232	0.0103971	0.00420252	0.107462	0.0459335	0.00992173	0.0793936	0.0239188	0.112811	0.0155169	0.108317
Peptide160	LSLEGDHSTPPSAY[+80]GSVK	A6NMY6	ANXA2P2	pY24	0.188658	0.10278	0.241073	0.0164494	0.00115743	0.0166714	0.172416	0.110466	0.317284	0.00909126	0.0155654	0.0449098	0.028445	0.0257849	0.494744	0.030026	0.0415172	0.0355024	0.0723692	0.0189717	0.0707956	0.162714	0.173806	0.193972	0.0936403	0.036797	0.0287098	0.0303967	0.0647995	0.0986229	0.0677018
Peptide246	SYSPY[+80]DMLESIR	A6NMY6	ANXA2P2	pY238	0.0394239	0.0188073	0.0191283	0.0130778	0.0198271	0.00494931	0.0211579	0.0222644	0.0188943	0.0011035	0.00689493	0.0121772	0.00744645	0.0113825	0.040767	0.00673387	0.320886	0.0135862	0.0165957	0.0101263	0.0161678	0.0144629	0.0158071	0.0289463	0.0121715	0.0123455	0.00791508	0.00421209	0.0110798	0.0196609	0.00581133
Peptide166	LYDAY[+80]ELK	P08758	ANXA5	pY94	0.00216014	0.00290849	0.00336654	0.00359727	0.00167684	0.00282011	0.00453881	0.00316991	0.00725689	0.00322391	0.00530575	0.00316675	0.0046278	0.0078389	0.00385922	0.023316	0.00593456	0.00510124	0.00513091	0.00480674	0.0142164	0.00615641	0.00516232	0.00530197	0.00239609	0.00208236	0.00474422	0.00504059	0.00649191	0.00266348	0.00192067
Peptide229	SLY[+80]SMIK	P08133	ANXA6	pY302	0.00257208	0.00266593	0.00511673	0.0033252	0.00238874	0.00376834	0.00360948	0.00347277	0.00394892	0.00195793	0.00255752	0.00413418	0.00670778	0.00455155	0.00412912	0.0111072	0.0109368	0.00483948	0.00368463	0.00673343	0.00633669	0.00742557	0.00452101	0.00476874	0.00313311	0.00189276	0.00334554	0.00337754	0.00907216	0.00319591	0.00334228
Peptide253	TEELIY[+80]LSQK	Q12774	ARHGEF5	pY1370	0.000275281	0.000378414	0.000191817	0.000204053	0.000283212	0.000246201	0.000405006	0.000367907	0.00104766	0.000247467	0.000202795	0.000520948	0.00656652	0.00041731	0.000239639	0.000694706	0.000400679	0.000189998	0.000309113	0.000292833	0.000469592	0.000235557	0.00022024	0.00033045	0.000301117	0.000359153	0.000406604	0.000237871	0.000217927	0.000267893	0.000421712
Peptide78	FELSC[+57]Y[+80]SLAPQIK	P00966	ASS1	pY133		0.000773772			0.00157689	0.00033859	0.000506028	0.000445846	0.000211591	0.000216977	0.000233719	0.000496544	0.000432321	0.000255448		0.000445523	0.0869215	0.00107001	0.00043094	0.000323982	0.000384885	0.000127322			0.000958576	0.000531955		0.00046047	0.000658683
Peptide91	GIVVY[+80]TGDR	P05023	ATP1A1	pY260	0.00292313	0.00109458	0.000940303	0.00157516	0.00166971	0.00116978	0.00142285	0.000796244	0.00223241	0.00116191	0.00393209	0.000512464	0.000785668	0.00229284	0.000869622	0.00233187	0.00202762		0.00172503		0.000936202	0.00141588	0.000784963	0.00209754	0.00141088	0.0016899	0.00372157	0.00192943	0.00081076	0.00159949	0.00142794
Peptide142	IYNGDY[+80]YR	P30530	AXL	pY702	0.000887946	0.000882359	0.0010724	0.000962416	0.000808442	0.000903415	0.000981563	0.000614832	0.0019293	0.000470544	0.00103956	0.00046964	0.000596725	0.000523337	0.00129053	0.00108402	0.000631793	0.000500025	0.000688811	0.000919628	0.000940953	0.00176176	0.000981409	0.00174589	0.00106346	0.0009944	0.000590135	0.000573888	0.00105634	0.00122599	0.000561895
Peptide16	AQQGLY[+80]QVPGPSPQFQSPPAK	P56945	BCAR1	pY128	0.00534633	0.00269205	0.00477178	0.0027015	0.00168728	0.000916986	0.00356298	0.00299404	0.00840075	0.000205783	0.00131106	0.00304578	0.00151105	0.0016539	0.00499124	0.00199566	0.00163542	0.00167842	0.00276417	0.00255262	0.00274489	0.00239793	0.00316323	0.00722894	0.0018475	0.00164107	0.00186189	0.00315599	0.00409212	0.00447618	0.00237433
Peptide119	HLLAPGPQDIY[+80]DVPPVR	P56945	BCAR1	pY249	0.0357629	0.014766	0.0270412	0.00707984	0.0102951	0.00532817	0.0205507	0.0132463	0.0536939	0.00124901	0.00894046	0.0151057	0.00448628	0.00443968	0.433242	0.0138842	0.00317494	0.0186673	0.0104575	0.0137611	0.0178847	0.0126206	0.0259586	0.102636	0.0125144	0.0122835	0.0163858	0.0211999	0.0282006	0.0443369	0.0172592
Peptide212	RPGPGTLY[+80]DVPR	P56945	BCAR1	pY387	0.0280577	0.0123631		0.0719365	0.00241518	0.0131552	0.014663	0.0117227	0.00865602		0.00523497	0.0012095		0.0102288		0.00425275		0.0384935		0.00511556	0.00448316	0.0864423	0.011355	0.0152365	0.0114704	0.0156847	0.0105859	0.00521377	0.0156959	0.0284607	0.0160373
Peptide280	VGQGYVYEAAQPEQDEY[+80]DIPR	P56945	BCAR1	pY234						0.133177	0.0582705			0.000816032	0.0473587	0.0614291	0.00226497	0.136726		0.00414478	0.0301874		0.00882399	0.00196758	0.0388565	0.202069				0.0061576	0.361572	0.187062	0.407017		0.118373
Peptide210	RIEY[+80]IEAR	Q8WUW1	BRK1	pY63	0.0015458	0.0011563	0.00111595	0.00100522	0.00170786	0.000881322	0.00136622	0.00157937	0.00147207	0.000651017	0.000827432	0.00119025	0.000777758	0.00124532	0.000593835	0.00136433	0.00273541	0.00100986	0.00141986	0.00187828	0.00114564	0.000840675	0.00100661	0.000943861	0.00102294	0.000679038	0.000764767	0.000726399	0.00133384	0.00164795	0.00119337
Peptide339	YVLDDEY[+80]TSSVGSK	Q06187	BTK	pY551	0.000267348	0.000389744	0.00408183	0.000268605	0.000546347	0.000732892	0.000860707	0.000355615	0.00124289	0.000411735	0.000561252	0.00320896	0.00120056	0.000515938	0.000477558	0.000679522	0.00326797	0.000775269	0.0009178	0.000985263	0.000897079	0.000811985	0.000857744	0.000706881	0.000324733	0.000282653	0.000365605	0.000699791	0.000502793	0.000719873	0.00105836
Peptide338	YVDSEGHLY[+80]TVPIR	Q03135	CAV1	pY14	0.0115921	0.00241477	0.0152396	0.00387535	0.00323797	0.00394989	0.00482648	0.00198258	0.0235284	0.000792902	0.0114011	0.00128287	0.00109135	0.00290405	0.0139499	0.093296	0.00282598	0.00634815	0.00470765	0.00378862	0.0236937	0.028224	0.00874279	0.026426	0.00223108	0.00239095	0.00276805	0.0163124	0.00881288	0.00471246	0.00153374
Peptide40	DTY[+80]DALHMQALPPR	P20963	CD247	pY153	0.0134435			0.000371528		0.00515934	0.00831653	0.0158463	0.0165168		0.017607	0.00118355				0.000841376	0.00313985	0.000894221				0.00859072		0.00130585	0.00627638	0.00866301	0.16439		0.00416365
Peptide55	EEY[+80]DVLDK	P20963	CD247	pY83	0.000212328	0.000189635	0.000212322	0.000182293	0.000189285	0.000180079	0.000180727	0.000190057	0.000175948	0.000224313	0.000234458	0.000186677	0.000176954	0.000214909	0.000224102	0.000164749	0.000238488	0.000207443	0.000179666	0.000169982	0.000146263	0.000228493	0.000224732	0.000208789	0.000219132	0.000226397	0.000205374	0.000216007	0.000228626	0.000214622	0.000196836
Peptide89	GHDGLY[+80]QGLSTATK	P20963	CD247	pY142	0.00589166	0.00205521	0.00651549	0.00159927	0.0041062	0.00266302	0.00548145	0.00832274	0.00574584	0.000352088	0.00299176	0.00183766	0.00228268	0.00207676	0.0029808	0.00211164	0.00360039	0.00114341	0.00322606	0.00445968	0.00417688	0.00379326	0.00375037	0.00173649	0.00105379	0.00141113	0.00280582	0.00237613	0.00904176	0.00173787	0.00080195
Peptide144	KNPQEGLY[+80]NELQK	P20963	CD247	pY111	0.000694274	0.000280188	0.00131868	0.000336797	0.000520849	0.000496137	0.000911847	0.0011851	0.000984	0.000200334	0.000501422	0.000371592	0.000416429	0.000357275	0.000744207	0.000495093	0.000754621	0.000324038	0.000591821	0.000773929	0.000654173	0.0007158	0.000711628	0.0003912	0.000295549	0.000270555	0.000492278	0.000398872	0.00170669	0.000443428	0.000222737
Peptide171	MAEAY[+80]SEIGMK	P20963	CD247	pY123	0.000647591	0.000286841	0.000889485	0.000408182	0.000526954	0.00024832	0.000942194	0.00147554	0.000694352	0.000126832	0.000335505	0.000489606	0.000527837	0.000317335	0.000579558	0.000490144	0.000410126	0.000381548	0.000457997	0.000618233	0.000846822	0.00123678	0.000680586	0.000477514	0.000269331	0.000336825	0.000248485	0.000492061	0.0018684	0.000375374	0.000193123
Peptide184	NPQEGLY[+80]NELQK	P20963	CD247	pY111	0.000375771	0.000273331	0.000580563	0.000328725	0.000370789	0.00027987	0.000473771	0.00060919	0.000432566	0.000241219	0.000442744	0.000197944	0.000275153	0.000286214	0.00050778	0.000317943	0.000458318	0.000215226	0.000303036	0.000585003	0.000391663	0.000451525	0.000429966	0.000300005	0.000256259	0.000228519	0.000357487	0.000327903	0.000799573	0.000253708	0.000213023
Peptide214	SADAPAYQQGQNQLY[+80]NELNLGR	P20963	CD247	pY72	0.0069714	0.000468317	0.00300625		0.00260264		0.00114922	0.00103263	0.00139958		0.000913761	0.000687114		0.000110516	0.0101779	0.000439532	0.000383814		0.00281749		0.00159808	0.00114785	0.00148481					0.000699928	0.00169687
Peptide23	DDAQY[+80]SHLGGNWA	P04234	CD3D	pY160	0.000157577			4.24563e-05	6.92662e-05	0.000105906		5.60323e-05		0.000247601	0.000266711	0.000146025	0.000164005	0.00024263	0.000187594		0.000263232	0.00025551	8.45721e-05			0.000149185	0.000299576	0.000129951	0.000119384	0.000247541		0.000183503	0.000491085	0.000230939
Peptide176	NDQVY[+80]QPLR	P04234	CD3D	pY149	0.000250054	8.45281e-05	0.000538153	0.000156829			0.000215163	0.000249713	0.000356721		0.000127112	9.61667e-05			0.000287149	0.000196555	0.000164743	0.00011346		0.000515156	0.00193458	0.000217855	0.000297168	0.000195058				0.000180105	0.000264792	0.000234725
Peptide203	QTLLPNDQLY[+80]QPLK	P09693	CD3G	pY160	0.000110539	0.000129081	0.000149821	0.000131681	7.31205e-05	0.000489099	0.000130107	0.000111386	0.000141167	0.000139088	0.000130103	0.000158082	0.00202443	0.000130342	0.00031085	0.000131906	0.000135203	0.000172993	0.000131609	0.00011986	0.000263455	0.000118228	0.00019295	0.000171455	0.000155118	0.000123942	7.58648e-05	0.000161244	0.000111339	0.000119312	0.00013133
Peptide138	IY[+80]DEILQSK	Q9UIB8	CD84	pY296	0.00182278	0.0051143	0.00380202	0.00849464	0.00847551	0.00577971	0.0168993	0.00623659	0.0244407		0.0126331	0.0127015	0.00782588				0.0123841		0.00179319	0.0109542	0.0105444	0.00192525	0.0292417	0.000282825			0.000274667	0.0126051	0.015545	0.000818409	0.000347795
Peptide100	GPAVGIY[+80]NDNINTEMPR	Q9H5V8	CDCP1	pY707	0.0233642	0.000239376	0.000233863	0.000147505	0.00023473	0.000645027	0.000276087	0.000190069	0.000278081	0.000207686	0.000765835	0.000351206	0.000545931	0.000203761		0.000519936	0.000222149		0.000256731	0.000267363	0.000180057	0.000363376	0.000223276		0.000198177	0.000366697	0.00149221	0.000381112	0.000374136		0.000338367
Peptide88	GGGPYDAPGGDDSY[+80]I	Q9HBB8	CDHR5	pY844	0.0786726	0.0634665	0.103501	0.151418	0.085019	0.109411	0.0842175	0.291597	0.0533849	0.192816	0.290009	0.101131	0.181549	0.00628485	0.377705	0.174019	0.341276	0.2431	0.126703	0.271049	0.650618	0.267415	0.22606	0.183855	0.0163698	0.187975	0.24127	0.250766	0.555605	0.140078	0.269439
Peptide150	LGEGTY[+80]ATVYK	Q00537	CDK17	pY203	0.00288675	0.000145427	0.000191492	0.00011274	0.000109432	9.15221e-05	0.000127058	0.00199171	0.000197838	0.000130391	0.000196116	0.000180847	0.000142619	0.000136132	0.000211609	0.000126903	0.000126426	0.000162276	0.000145752	9.37179e-05	0.000142576	0.000162075	0.000137818	0.000164467	9.96574e-05	0.000140787	0.000155717	0.000133184	0.00013207	0.00013011	0.000145156
Peptide133	IGEGTY[+80]GVVYK	P24941	CDK2	pY15	0.155535	0.378164	0.0362143	0.117423	0.199114	0.110263	0.155807	0.192407	0.177122	0.0229988	0.0519986	0.0732031	0.383008	0.126602	0.0614682	0.0772149	0.0526592	0.0967831	0.0557307	0.105015	0.136125	0.0468941	0.109928	0.0558361	0.447644	0.207315	0.0990591	0.0213447	0.102432	0.242989	0.0849376
Peptide132	IGEGT[+80]Y[+80]GVVYK	P24941	CDK2	pT14;pY15	0.0618024	0.203544	0.0393235	0.093357	0.175037	0.172343	0.149138	0.133595	0.127917	0.0786539	0.06109	0.0542284	0.109842	0.0942602	0.123171	0.043593	0.043123	0.242728	0.00904338	0.0368107	0.125449	0.0941999	0.194603	0.0818343	0.263588	0.250371	0.146605	0.0637586	0.0770883	0.220453	0.159406
Peptide117	HELQANC[+57]Y[+80]EEVKDR	P23528	CFL1	pY140	0.0218876	0.0316158	0.0138681	0.0111814	0.0196539	0.0100841	0.0272595	0.0178211	0.0228439	0.00800262	0.00753715	0.0144841	0.00697383	0.0135765	0.0102038	0.0204193	0.0267495	0.0123283	0.00594279	0.0149649	0.0262829	0.0142678	0.0177122	0.0157429	0.0249413	0.0209315	0.0153153	0.01375	0.0116194	0.0174342	0.0123808
Peptide235	SNY[+80]YDAYQAQPLATR	P57739	CLDN2	pY194	7.96444e-05	9.84561e-05	0.00185425	3.1978e-05	2.54563e-05	0.000191473	0.00146886	0.00049102	0.000512124	0.000163818	0.000491558	2.38312e-05	0.000546228	3.5475e-05	7.0041e-05	0.000305912	3.00964e-05	4.22246e-05	6.16479e-05		0.000973386	0.00100422	0.000277871	0.000118907		0.000125258	0.00020179	7.81659e-05	1.23249e-05	0.00151532	0.000645639
Peptide242	STGPGASLGTGY[+80]DR	O15551	CLDN3	pY214	0.00204472	0.0179892	0.00666946	0.00177433	0.0014969	0.00156258	0.00136252	0.00206065	0.00854758	0.00291914	0.00174551	0.00283377	0.00397966	0.0123857	0.00109599	0.00230946	0.00182742	0.00165031	0.000501356	0.001913	0.00498648	0.00274021	0.000871834	0.00115996	0.00236004	0.0166918	0.00146748	0.00169866	0.000844011	0.00380281	0.00377061
Peptide292	VVY[+80]SAPR	O15551	CLDN3	pY198	0.00739639	0.0177163	0.0112778	0.00248514	0.00192531	0.00134949	0.0028032	0.00375872	0.0195127	0.00336766	0.00179371	0.00400518	0.0025472	0.0105375	0.00259488	0.00315224	0.00113751	0.00273771	0.00169642	0.00207204	0.00854286	0.00302762	0.00192451	0.00158805	0.00192005	0.0183052	0.00211006	0.00175185	0.00130844	0.00384819	0.00380829
Peptide19	AY[+80]EFAER	Q00610	CLTC	pY1096	0.000876612	0.000974304		0.000709093	0.00257218	0.000462479	0.000656605	0.000913374	0.000671289	0.000522133	0.000759347	0.0011785	0.00160886	0.00102868	0.00263698	0.000881446	0.000892087	0.00112288	0.00104126		0.0030615	0.000497065	0.00108043	0.00112928	0.000656856	0.000851701	0.00059051	0.000707244	0.000580731	0.00164346	0.0010895
Peptide261	TSIDAY[+80]DNFDNISLAQR	Q00610	CLTC	pY1487	0.00856192	0.0141625	0.00443302		0.00877596	0.00108778	0.0042227	0.00431762	0.00236425	0.00245849	0.00382856	0.00585966	0.000464051	0.00185457			0.000456164		0.00107817	0.00115406	0.00459657	0.00527936	0.00903655		0.000349306	0.0104319	0.00242562	0.00378859	0.00362099		0.00086101
Peptide75	FASQQGMTAY[+80]GTR	P51911	CNN1	pY182			0.00148947	0.0013515	0.000930774		0.000535948	0.000403119	0.00138387	0.000891284	0.000465031	0.000730298		0.00293307	0.00548483	0.00912013	0.00152652	0.00272418	0.00145557		0.00751617	0.00689828	0.00102795	0.00246233	0.000548893	0.000743044	0.000722595	0.00347755	0.00259663	0.000556142	0.00133942
Peptide101	GPAY[+80]GLSAEVK	P51911	CNN1	pY12	0.000188696	0.000192149	0.000947918	0.000723687	0.000385952	0.000981119	0.000427877	0.00017403	0.000654502	0.000467363	0.000437864	0.000664004	0.000174783	0.000545568	0.000890855	0.00449033	0.000306764	0.00152854	0.000461284	0.00105442	0.00172688	0.00220016	0.000564567	0.00127725	0.000240794		0.000394021	0.00155525	0.00100445	0.00147762	0.000355606
Peptide96	GMSVY[+80]GLGR	Q15417	CNN3	pY261		0.000871069	0.00389055	0.00216702			0.0012907	0.000853142	0.00258308		0.000659134	0.000990557	0.0018431	0.00102488	0.00235328	0.00324087	0.000915358	0.00201256	0.0018101	0.00346017	0.00236691	0.00134045	0.00712292	0.00847795	0.00144427	0.0022697	0.00156964	0.00171881	0.00185101	0.00158389	0.00179382
Peptide38	DSSTSPGDY[+80]VLSVSENSR	P46108	CRK	pY47	0.00055517	0.000619704	0.000709003	0.000548273	0.000671259	0.000573862	0.0007084	0.000618027	0.000648794	0.000438319	0.000488929	0.000588582	0.00115117	0.00046123	0.000453744	0.00069487	0.00294252	0.000677931	0.000697673	0.000720231	0.000712266	0.000552942	0.000522826	0.00059857	0.000596819	0.000489806	0.000549845	0.000440698	0.000498495	0.000566152	0.000519557
Peptide37	DSSTC[+57]PGDY[+80]VLSVSENSR	P46109	CRKL	pY48	0.000549571	0.000665374	0.000626043	0.000463696	0.000694346	0.000214779	0.000761699	0.000618325	0.000610668	0.000455107	0.000451882	0.000452535	0.00101142	0.000569356	0.000551201	0.000760322	0.00247221	0.000682295	0.000557035	0.000764671	0.000810495	0.00062046	0.000506426	0.000774691	0.00137151	0.000601382	0.000669708	0.00055552	0.000713602	0.000819277	0.000627087
Peptide79	FHPEPY[+80]GLEDDQR	O60716	CTNND1	pY280	0.00229229	0.0029621	0.00151006	0.00138686	0.00173234	0.00105367	0.0019593	0.00151007	0.00353789	0.000554488	0.000848438	0.00272593	0.00190097	0.00230758	0.00212457	0.00111228	0.000965003	0.000658961	0.00125435	0.00120266	0.00187986	0.000963148	0.00083591	0.00118216	0.00191104	0.00140097	0.00100355	0.000775805	0.000982655	0.00142205	0.00133917
Peptide124	HYEDGYPGGSDNY[+80]GSLSR	O60716	CTNND1	pY228	0.0107563	0.0105081	0.00365288	0.00256771	0.00235955	0.00101138	0.00873003	0.00665332	0.0328397	0.00094143	0.00141068	0.00624237	0.00276421	0.00384919	0.0177248	0.00204078	0.000344236	0.00166175	0.00348358	0.00239849	0.00367227	0.002591	0.0040889	0.00484287	0.0100298	0.00497015	0.00314134	0.00173495	0.00270475	0.00591887	0.00335455
Peptide193	QDVY[+80]GPQPQVR	O60716	CTNND1	pY257	0.0129321	0.0077956	0.00231361	0.00590004	0.00407652	0.00136296	0.00749525	0.00750691	0.0197813	0.00100855	0.00184931	0.00825288	0.00279821	0.0111456	0.0290092	0.0032124	0.000904061	0.0015204	0.00401441	0.00361436	0.00534354	0.00205951	0.00328516	0.00523052	0.00842561	0.00476279	0.0046991	0.002052	0.00299617	0.0075696	0.00290882
Peptide226	SLDNNY[+80]STPNER	O60716	CTNND1	pY904	0.00559855	0.00248966	0.00125904	0.00226457	0.000928852	0.000424192	0.0024802	0.00122549	0.00897398	0.000327891	0.000567898	0.00178703	0.00173099	0.00180744	0.00279308	0.000596623	0.000768071	0.000502043	0.000945914	0.000823838	0.00251623	0.00121409	0.00131136	0.00169871	0.00238045	0.00202801	0.000959805	0.000420983	0.000819692	0.00224691	0.000947882
Peptide237	SQSSHSY[+80]DDSTLPLIDR	O60716	CTNND1	pY865	0.00182225	0.00114489	0.000504124	0.000740239	0.000652005	0.000774764	0.00130953	0.000841683	0.00201632	0.000351537	0.000370436	0.00101048	0.000806197	0.00101181	0.00148671	0.000548162	0.000590061	0.000692947	0.00052202	0.000574696	0.00107499	0.000671125	0.000569296	0.000589812	0.00130224	0.00137493	0.000986704	0.000843583	0.000389314	0.000910372	0.000916498
Peptide319	Y[+80]RPSMEGYR	O60716	CTNND1	pY241	0.0152319	0.0142126					0.00540479	0.00682156	0.0021589	0.0159515	0.00332539	0.00406773		0.0286006	0.00363298			0.000739274				0.00362037	0.00185429	0.00494865	0.00682303	0.00351934			0.00271644
Peptide168	LYGDADY[+80]LEER	P17812	CTPS1	pY473	4.02962e-05	0.000155511	4.34488e-05	4.20973e-05	9.83374e-05	8.64785e-05	8.89839e-05	8.39229e-05	7.56726e-05	3.44322e-05	5.29871e-05	8.5465e-05	0.000833824	6.42018e-05	3.96648e-05	0.000379244	0.00545256	0.000107703	0.000144173	9.99006e-05	0.00016394	7.78002e-05	9.23673e-05	4.10964e-05	0.000125493	0.000112077	8.92405e-05		0.000150628	9.89311e-05	4.2625e-05
Peptide158	LPSSPVY[+80]EDAASFK	Q14247	CTTN	pY421	0.00763093	0.0030807	0.00132605	0.00277549	0.00164988	0.000539335	0.00267476	0.00138205	0.00972622	0.000246188	0.00147899	0.00147252	0.000770948	0.000714966	0.00134279	0.00155073	0.000867103	0.00167783	0.00102318	0.00119879	0.00160175	0.0016942	0.00287707	0.00413483	0.00301314	0.00198937	0.0013827	0.001795	0.00381564	0.00498835	0.000902748
Peptide99	GNPPHSAPC[+57]VPNGSALLLSNPAY[+80]R	Q08345	DDR1	pY513				0.00296564		0.00121528	0.00156047	0.00100686	0.0113578	0.00330174	0.00264574	0.00138235	0.00457278	0.00295243	0.020648	0.00176925	0.000955432	0.00259312	0.00240052	0.00120276	0.00484774	0.0141113	0.001039	0.00443982	0.00184729	0.00206356	0.00127099	0.00176238	0.00171054	0.0349838	0.000994459
Peptide131	IFPLRPDY[+80]QEPSR	Q16832	DDR2	pY481	0.00107927	0.000821337	0.00505934	0.00333715	0.000737618	0.001317	0.00152754	0.00055299	0.00629193	0.000593097	0.00233412	0.000795344	0.000933746	0.000986731	0.00433857	0.0140463	0.0012094	0.00231757	0.00296834	0.00244536	0.00579422	0.00672428	0.00345515	0.00989516	0.000958336	0.000765229	0.000969708	0.00368899	0.00393758	0.0029831	0.00134719
Peptide330	YGTC[+57]IY[+80]QGR	P59665	DEFA1	pY85		0.000327487		0.00106311	0.000832187	0.0119362	0.000673899	0.000374482	0.000646607	0.000630116	0.00120604	0.00125214	0.00271735	0.00107441	0.00123577	0.000533351	0.00225049	0.00127843	0.00343071	0.00238915	0.00109411	0.00148951	0.000530869	0.00135269	0.00294263		0.00124358	0.00121849		0.00163332	0.00346113
Peptide73	FANY[+80]IEK	P17661	DES	pY122	0.000408309	0.000387687	0.000405089	0.000399122	0.000346512	0.000379607	0.000425192	0.00038377	0.000446167	0.000359382	0.000431472	0.000385188	0.000367476	0.00043027	0.000372202	0.00070758	0.000375608	0.000470972	0.000389732	0.000381244	0.000698616	0.000455148	0.000379442	0.000373543	0.000360851	0.000332449	0.000356169	0.000379155	0.000528171	0.000351729	0.00034138
Peptide74	FASEASGY[+80]QDNIAR	P17661	DES	pY363	0.000180776	9.97051e-05	0.00106458	0.000165249	0.000132858	8.06804e-05	0.000124407	0.000116432	0.000248648	0.000117873	0.000634518	8.94664e-05	0.000157975	0.0004299	0.000110394	0.0303892	0.000686192	0.00391534	0.00028986	9.36291e-05	0.0122918	0.00234341	0.000108665	0.000306839	0.00015796	0.0018376	0.00040855	0.00251108	0.00329631	8.41044e-05	6.34586e-05
Peptide195	QEMMEY[+80]R	P17661	DES	pY324	0.000223072	0.000209322	0.000556503	0.000200906	0.000456789	0.000276906	0.000129659	0.000138448	0.000232689	0.000176075	0.000186615	0.000142493	0.000228225	0.000189046	0.000153559	0.00147886	0.000212401	0.000335967	0.000195653	0.000249246	0.00114259	0.000448621	0.000146388	0.000194188	0.000144667	0.000150473	0.000130075	0.000183625	0.000374071	0.000172326	0.000147363
Peptide47	DYEVDGRDY[+80]HFVTSR	Q12959	DLG1	pY760	0.000585671	0.000489752	0.000153896	0.000126352	0.000124325	8.38423e-05	0.000346583	0.00177912	0.000558172	2.87078e-05	8.74929e-05	0.000108142		7.83042e-05	0.000489743	0.00032765		0.000101696	7.33986e-06	4.95763e-05	0.000237207	0.000106254	8.00837e-05	0.000117284	0.000404514	0.000392493	0.000203202	5.58586e-05	0.000105735	0.00031163	0.000418985
Peptide43	DY[+80]HFVTSR	Q12959	DLG1	pY760	0.00217779	0.00289545	0.000913137	0.000565645	0.000788455	0.000652459	0.00186491	0.00153907	0.00205	0.000462625	0.000974241	0.000786766	0.000413688	0.000936193	0.000475278	0.00229099	0.000314669	0.000581905	0.000525667	0.00055917	0.00198289	0.000863752	0.000703758	0.000803672	0.00212199	0.00196376	0.00129259	0.00075831	0.000721965	0.00194752	0.00177734
Peptide32	DNEVDGQDY[+80]HFVVSR	Q92796	DLG3	pY673	0.00395976	0.00201334	0.00263446	0.00047343	0.00106121	0.000233367	0.00234383	0.000648657	0.00446991		0.000161082	0.000224242	0.000325347		0.000426483	0.000346467		0.000158615	0.000240352		0.0006748	0.000676614		0.000801394	0.00196292	0.0013887	0.000433987	0.000177097	0.000260925	0.00139663	0.000296374
Peptide116	HAQDY[+80]VLTYNYEGR	Q02487	DSC2	pY853	0.0012701	0.00100731		0.000454399	0.000593136	0.000579248	0.00156902	0.00014768		0.00030707	0.000171548				0.000414044		0.00248742		0.000189877			0.00098479	0.000361608	0.000883928	0.000453622	0.00144747			0.000858375	0.0006986	0.000457119
Peptide337	YTY[+80]SEWHSFTQPR	Q14574	DSC3	pY818		0.000800412	6.39932e-05	0.00781209		0.00496455		0.0023908	0.00535445	0.000394974	0.000937938			0.000866057	0.00475563		0.000872028	0.000787411	0.00249361	0.000572519		0.00218425	0.00416349	0.0016552	0.00271138	0.00218109	0.00151379	0.000644604	0.000803091	0.00825947	0.00117986
Peptide5	AESGPDLRY[+80]EVTSGGGGTSR	P15924	DSP	pY28	0.000988891	0.000356358	0.000812296	0.000367343	0.00109485	0.000767966	0.0025982	0.00116266	0.000938519		0.000333974	0.000310781	0.000238632	0.00114895	0.000650102			0.00036803	0.000890603		0.000500153	0.00039965	0.000493059	0.000537226	0.000459603	0.000353789	0.000262727	0.000125926	0.00080119	0.00156917	0.00057196
Peptide95	GLIDRDLY[+80]R	P15924	DSP	pY2159		0.000551328	0.00140214	0.000642602	0.000395291	0.000474544	0.000713861	0.000623027		0.000476729	0.000674014	0.000382962	0.0004894	0.000742562	0.000739106	0.00124775	0.00418452	0.00160098	0.0012033	0.000838602	0.000266491	0.000627701	0.000615373	0.00166516	0.000480072	0.000416832	0.000724414	0.000547778	0.000415694	0.00593311	0.000481013
Peptide110	GVITDQNSDGY[+80]C[+57]QTGTMSR	P15924	DSP	pY56	0.134107	0.0215288	0.00721233	0.127483	0.0323256	0.00966015	0.0866166	0.0383952	0.024064	0.00163148	0.00803372	0.0368987	0.0200751	0.0281248	0.06257	0.00693608	0.0034631	0.011023	0.0486275	0.00684675	0.0158021	0.00843833	0.0152818	0.00406173	0.00988491	0.0387651	0.00737368	0.00443802	0.010033	0.0319466	0.0067996
Peptide209	RGVITDQNSDGY[+80]C[+57]QTGTMSR	P15924	DSP	pY56	0.00351812	0.00124806	0.00128331	0.0012479	0.00147076	0.00146783	0.00760104	0.00306573	0.00232668	0.000375828	0.000512564	0.00129953	0.00126794	0.00039874	0.00236238	0.000686575	0.000215388	0.00162784	0.00155949		0.000930342	0.000981038	0.00060074	0.000574612	0.00149754	0.000862585	0.00070947	0.000477879	0.00137247	0.00203634	0.0007885
Peptide298	VYNDGYDDDNY[+80]DYIVK	Q13627	DYRK1A	pY145	0.00114741	0.105099	0.000219059	0.0104152	0.0750934	0.0175594	0.0732109	0.0611668	9.54887e-05	0.0216072	0.0186735	0.0179747		0.0133245		0.038075	0.00940047	0.00135407	0.0354948	0.0370659	0.00263808	0.0690165	0.00217127	0.000666445		0.0333727	0.00448735	0.00607775	0.0186102	0.00352326	0.00558
Peptide143	IYQY[+80]IQSR	Q9Y463	DYRK1B	pY273	0.589921	0.666971	0.373508	0.295958	0.348374	0.475763	0.67431	0.904555	0.593374	0.232273	0.416612	0.344615	0.400229	0.494089	0.646895	0.558776	0.240713	0.342658	0.404668	0.523815	0.628892	0.450075	0.535902	0.520571	0.63933	0.528203	0.439479	0.465344	0.523897	0.765804	0.41595
Peptide299	VYTY[+80]IQSR	Q92630	DYRK2	pY382	0.00173053	0.00113647	0.0011059	0.00118626	0.00215909	0.00156106	0.00115836	0.00218875	0.0021347	0.00102126	0.00145782	0.00099405	0.0012219	0.00102573	0.00163071	0.00192756	0.00112552	0.000841852	0.00152418	0.00136562	0.0012434	0.00174471	0.00111338	0.00114638	0.00127009	0.00127265	0.000890191	0.000554347	0.000856753	0.00161806	0.000767878
Peptide263	TTENNYC[+57]PHY[+80]EK	P98172	EFNB1	pY317	0.00331631	0.00970283	0.0045846	0.000432896	0.00107611		0.00135773	0.00125259	0.00487785	0.000554123	0.00130265		0.00381635	0.00170204	0.00160231	0.00268498			0.00025273		0.00265651	0.00281322	0.00109178	0.00526811	0.00118797	0.00744956	0.00154333	0.000765517	0.00131812	0.0022007	0.00183147
Peptide33	DPHYQDPHSTAVGNPEY[+80]LNTVQPTC[+57]VNSTFDSPAHWAQK	P00533	EGFR	pY1138						0.0012077	0.00311169			0.00112697	0.00208545	0.00174721	0.000819445	0.00105885			0.0010489		0.000917052	0.0010344	0.00138597	0.00124495	0.000761802		0.002437		0.00187111		0.00195022		0.00181694
Peptide105	GSHQISLDNPDY[+80]QQDFFPK	P00533	EGFR	pY1172		0.222247	0.820324	1.01159		0.102685	0.220445	3.07497	0.47351	0.23521	0.126438	0.198064	0.166968	0.392549		0.189571	0.190195		0.0912684	0.149537	0.234008	0.062248	0.198077		3.18606	1.2134	0.120415	0.436321	0.190535		0.294367
Peptide107	GSTAENAEY[+80]LR	P00533	EGFR	pY1197	0.00280103	0.00238225	0.000825405	0.00104336	0.000689781	0.00047217	0.00214199	0.00157533	0.00856352	0.000101186	0.000577265	0.001029	0.000485966	0.000415515	0.000567838	0.00110079	0.000375445	0.00037177	0.000502263	0.000310161	0.00150134	0.00110932	0.000576943	0.00176248	0.00170478	0.00280903	0.000541208	0.000434548	0.00127662	0.00263086	0.000507023
Peptide174	MHLPSPTDSNFY[+80]R	P00533	EGFR	pY998	0.00112055	0.000434223			0.000281628	0.000163544	0.00032714	0.000234879	0.00124067	0.000158116	0.00016922	0.000320366	0.000200583	0.000611356	0.00412653		0.000138938				0.000547709	0.000231145	0.00015946		0.000333186	0.000628384	0.000476553		0.000195748	0.000589328	0.000313192
Peptide211	RPAGSVQNPVY[+80]HNQPLNPAPSR	P00533	EGFR	pY1110		0.00327265		0.00122044			0.00176251	0.00116836	0.00780953	0.0573735	0.000374386	0.000771954	0.00206833	0.000693482		0.00104604	0.000803496		0.00195013		0.00114612	0.00143029	0.000634894	0.00238213	0.0027436	0.00308782	0.000322555		0.00104087	0.00308062	0.000643168
Peptide316	Y[+80]LVIQGDER	P00533	EGFR	pY978	0.00197935	0.00099565	0.00142707	0.00104976	0.00128495	0.000748511	0.00207359	0.00113106	0.000838243	0.0019009	0.0158581	0.00142325	0.0029371	0.00209032		0.0022153	0.00257401	0.00166705	0.00177369	0.000329782	0.00103362	0.00304303	0.00276413	0.000790681	0.00227313	0.00064808	0.00211134	0.000590974	0.00257177
Peptide156	LLDDFDGTY[+80]ETQGGK	P21709	EPHA1	pY781	0.00118709	0.00194956	0.000401406	0.000367489	0.000710743	0.00020695	0.000692372	0.000584508	0.00749628	0.000358823	0.000453194	0.000748191	0.00036051	0.00157269	0.000423213	0.000781792	0.000482537	0.000751263	0.000213335	0.000569822	0.00243211	0.00132412	0.000445525	0.000441336	0.00130331	0.00146801	0.000562628	0.000502827	0.000320528	0.00218052	0.000740003
Peptide202	QSPEDVY[+80]FSK	P29317	EPHA2	pY575	0.0705746	0.336655	0.13772	0.00171458	0.0483065	0.633397	0.0951554	1.13931	0.499601	0.0569135	0.266098	0.55449	0.298364	0.245881	0.41473	0.0824601	0.314082	0.136783	0.0668305	0.0982764	0.123605	0.327029	1.15755	0.284341	0.349269	0.385616	0.124799	1.35382	4.98676	1.04339	0.191079
Peptide268	TYVDPHTY[+80]EDPNQAVLK	P29317	EPHA2	pY594	0.00380271	0.00291427	0.00185865	0.000730612	0.00246668	0.000970228	0.00153834	0.00213467	0.00712239	0.00108926	0.00174441	0.00111591	0.00147843	0.00108795	0.00293959	0.00159964	0.000906388	0.000956062	0.00080709	0.000777974	0.00270631	0.00194604	0.00172455	0.0013258	0.00112983	0.00290655	0.00129602	0.00105902	0.0007928	0.00254636	0.00156442
Peptide267	TY[+80]VDPHTYEDPNQAVLK	P29317	EPHA2	pY588	0.00163234	0.00129718	0.00127693	0.00135964	0.00125973	0.00185327	0.00103642	0.000905397	0.0023058	0.00101108	0.000962008	0.000804656	0.000942118	0.000991182	0.00117452	0.000994298	0.000806606	0.000780906	0.0010002	0.000700436	0.00194164	0.00107474	0.000913087	0.00102454	0.00106469	0.00120437	0.00105493	0.000929937	0.000854855	0.00122727	0.000802777
Peptide286	VLEDDPEATY[+80]TTSGGK	P29317	EPHA2	pY772	0.0076331	0.00579615	0.00367762	0.00323946	0.00530148	0.00307383	0.00364002	0.00376199	0.0231526	0.000963211	0.0030744	0.00198917	0.00472188	0.00283342	0.00689029	0.00252066	0.00515831	0.000855928	0.000992078	0.00221822	0.00570304	0.00587412	0.00365842	0.0028659	0.00368619	0.0062333	0.00159632	0.00159803	0.000667791	0.00833405	0.00249523
Peptide285	VLEDDPEAAY[+80]TTR	P54764	EPHA4	pY779	0.0673159	0.00870322	0.00915539	0.00996807	0.00443522	0.00454002	0.0538384	1.24829	0.0333433	0.000587747	0.00455921	0.0027998	0.00690649	0.00151168	0.0149487	0.0106109	0.010843	0.00389762	0.00589513	0.00586692	0.00755887	0.0115864	0.0161085	0.00938405	0.00505349	0.00598029	0.00293236	0.00472322	0.00600087	0.0166129	0.00300716
Peptide304	WTAPEAIAY[+80]R	Q9UF33	EPHA6	pY850	0.000998421	0.00493686		0.000258444	0.000594511	0.000324954	0.000516076	0.000565179	0.000318034	0.000296499	0.00029146	0.000270923		7.68358e-05	0.000166227	0.000695507		0.000439939			0.000619737	0.000328688	0.00038552	0.00017829		0.00521083	0.000378174	0.000382145	5.81031e-05	0.000162865	0.000902735
Peptide282	VIEDDPEAVY[+80]TTTGGK	Q15375	EPHA7	pY791	0.0420697	0.0530973	0.408697		0.00653611		0.0508899	0.00717027	0.350253		0.0133198			0.00993693		0.502547	0.0123692	0.0111787	0.00932035		0.063614	0.033651		0.00794272				0.024702	0.0225425	0.0129431
Peptide141	IYIDPFTY[+80]EDPNEAVR	P54762	EPHB1	pY600	0.0142994	0.00796173	0.00125503	0.000613771	0.000848501	0.000861911	0.00242101	0.00315404	0.021386	0.000479773	0.000493068	0.000533682	0.000444431	0.00129301	0.00195334	0.00168967	0.000107938	0.000661451	0.000424183	0.000250864	0.00309008	0.00126949	0.00134004	0.001159	0.00169254	0.00706174	0.000959075	0.00046832	0.000370064	0.00281529	0.00259402
Peptide81	FLEDDPSDPTY[+80]TSSLGGK	P54753	EPHB3	pY792	0.0139115	0.0510827	0.000671495	0.00376093	0.00485991	0.0159098	0.00895683	0.00568385	0.00600809	0.00279367	0.00391112	0.00790256	0.0239359	0.000873058	0.00125919	0.00595941	0.00515809	0.00337969	0.000591763	0.00212258	0.00414193	0.00538381	0.00500509	0.00208271	0.00326851	0.0521835	0.00358112	0.00202869	0.000399622	0.0103387	0.0151023
Peptide159	LQQY[+80]IAPGMK	P54753	EPHB3	pY600	0.0037273	0.0201194	0.000629417	0.0017632	0.00213909	0.00428543	0.0022249	0.00235315	0.00121926	0.00100994	0.00139401	0.00253695	0.00969532	0.000536154	0.000475355	0.00294006	0.000927674	0.00112081	0.000336053	0.00101125	0.00146302	0.00257029	0.00143833	0.00069598	0.000550079	0.0194347	0.00108543	0.000924364	0.000200457	0.00330815	0.00479636
Peptide333	YLSEMNY[+80]VHR	P54753	EPHB3	pY754	0.002184	0.00841926		0.00106515	0.00181617	0.00216452	0.00152332	0.00184294	0.00131811	0.000728151	0.00199123	0.00284244	0.00231574			0.00171894		0.00359901		0.00137352		0.00335708	0.00169462			0.00965388	0.00118606	0.00464905		0.00277602	0.00377321
Peptide57	EIDVSY[+80]VK	P54760	EPHB4	pY614	0.00100917	0.00118781	0.00132211	0.000550234	0.00151079	0.000752618	0.000858448	0.000593813	0.000753509	0.00110212	0.000627556	0.0005916	0.00121327	0.00067186	0.00106401	0.000692002	0.000888847	0.000543419	0.00110851	0.000915429	0.00106971	0.000808055	0.000622025	0.00126017	0.000711417	0.000672054	0.000868646	0.000697303	0.000991839	0.000978781	0.000653096
Peptide296	VY[+80]IDPFTY[+80]EDPNEAVR	P54760	EPHB4	pY590;pY596		3.11053	0.0471433	0.0444302	0.478638	0.107514	0.532968	0.404151		0.0486877	0.0291781	0.0603701	0.0685675	0.00873153		0.0423441	0.00315891	0.170019	0.0208834	0.0613136	0.099592	0.0692832	0.164552		0.437369	1.60841	0.0303269	0.0195365	0.00904255	0.0756727	0.149946
Peptide109	GTPTAENPEY[+80]LGLDVPV	P04626	ERBB2	pY1248	0.00125549	0.000493352	0.000439241	0.000297713	0.000366023	0.000165636	0.000836983	0.000496169	0.0042145	0.000440047	0.00102999	0.000563916	0.000328483	0.000342749	0.00200639	0.000476543	0.000351993		0.000308126	0.000781255	0.000510096	0.000320247	0.000873837	0.000736704	0.000596095	0.00043467	0.000126325		0.000432994	0.00078299	0.000620344
Peptide227	SLEATDSAFDNPDY[+80]WHSR	P21860	ERBB3	pY1328	0.00134431	0.00225173	0.000963677	0.000756873	0.00202998	0.00263858	0.00200281	0.0013975	0.00414063	0.000174719	0.000436135	0.000506388	0.000525547	0.000401617	0.000343091	0.000779545	0.0003205	0.00052406	0.00049946	0.000455533	0.00161177	0.000353215	0.000197575	0.000647419	0.00149525	0.00185083	0.000273835	0.000243685	0.000406341	0.00159832	0.00027737
Peptide186	NQETY[+80]ETLKHEKPPQ	P30273	FCER1G	pY76	0.00269061	0.00188494	0.0122937	0.00421752	0.00537389	0.0088694	0.00829003	0.00360628	0.0136423	0.00107152	0.00225059	0.0102784	0.0086286	0.0013001	0.0102847	0.0039228	0.0169042	0.00356157	0.00950905	0.00776389	0.00318211	0.00756697	0.0171561	0.00565056	0.00271782	0.00184231	0.00153164	0.00279557	0.00786259	0.0115337	0.00741652
Peptide154	LIKDDEY[+80]NPC[+57]QGSK	P09769	FGR	pY412	0.00109047	0.00256389	0.00486228	0.00457404	0.00563017	0.0126005	0.0028153	0.00148666	0.0136745	0.00252353	0.00502674	0.0259709	0.0224119	0.00626058	0.00208928	0.00522224	0.0835936	0.0107816	0.0124928	0.0128391	0.00252367	0.00522109	0.0025323	0.00509757	0.0133831	0.0016965	0.00171606	0.00785186	0.00129516	0.0159231	0.01303
Peptide199	QLLY[+80]SENK	P42685	FRK	pY132	0.00185273	0.001494	0.0016294	0.00145195	0.00206987	0.00160685	0.00132358	0.0012314	0.00225765	0.00121914	0.00115524	0.00194782	0.00204998	0.00179844	0.00139073	0.00212248	0.00151184	0.00148806	0.00143034	0.00197949	0.00243159	0.001096	0.00136112	0.0011185	0.00160334	0.0013608	0.00103763	0.00107661	0.00108159	0.002228	0.00115621
Peptide274	VDNEDIY[+80]ESRHEIK	P42685	FRK	pY387	0.0688041						0.0919432			0.0229796	0.0502965	0.353572		0.0270494	0.00327241	0.0165963	0.00510079	0.00552158	0.0619617		0.014932	0.0156528	0.0315302	0.0133445		0.304744			0.0374226		0.0214317
Peptide262	TTAVEIDY[+80]DSLK	O15117	FYB1	pY571	0.0307946	0.0137139	0.0835912	0.0148793	0.0266448	0.0646161	0.0520892	0.00829443	0.0818792	0.00272268	0.023176	0.0454611	0.0357504	0.00817956	0.0656159	0.0239491	0.0720262	0.0239714	0.0143357	0.0417556	0.0226079	0.0543076	0.0601356	0.0398171	0.0594425	0.0130633	0.0620536	0.0164841	0.090235	0.110351	0.0392613
Peptide279	VGFQY[+80]EGTYK	P11413	G6PD	pY503	0.00065111	0.00167934	0.00101766	0.00106827	0.0013048	0.00207782	0.00186164	0.000694408	0.00180151	0.000418473	0.00127016	0.00231839	0.00235081	0.00294764	0.00178776	0.00135103	0.00942187	0.00195643	0.0031811	0.0040503	0.00156705	0.0014484	0.00213006	0.00165053	0.00377804	0.00107357	0.00148404	0.00135522	0.00296125	0.00341199	0.00126278
Peptide22	DASSQDC[+57]Y[+80]DIPR	Q13480	GAB1	pY406	0.0032579	0.00540124	0.00217137	0.0010026	0.00101953	0.000390053	0.00348216	0.00187153	0.0126722		0.000835464	0.000791646	0.000410754	0.000788618	0.00162214	0.00182229	0.000891983	0.000704122	0.00113194	0.000993901	0.00308493	0.00213224	0.00145445	0.00389989	0.0030577	0.00394264	0.00117032	0.000773149	0.00227514	0.00247533	0.000743037
Peptide205	QVEY[+80]LDLDLDSGK	Q13480	GAB1	pY627		0.0457433		0.00458503	0.00623091	0.003298	0.0239417	0.019703	0.0159845		0.00328647	0.00739376	0.00478831	0.00544894		0.0105025	0.00974588	0.00133583	0.00491703	0.0046614	0.0258973	0.0209656	0.00919416	0.0162062	0.0186707	0.0274594	0.0116206		0.00912378	0.00458939	0.00453462
Peptide239	SSGSGSSVADERVDY[+80]VVVDQQK	Q13480	GAB1	pY659	0.0108422	0.0206747	0.00986327	0.00187173	0.00492119	0.000781503	0.0187881	0.00739097	0.145044		0.00101987	0.00277833	0.00176793	0.00190861	0.00114144	0.00804288	0.0040528	0.00405522	0.00443903	0.00272666	0.0191648	0.0133962	0.00574963	0.0127211	0.0311117	0.0152484	0.00393948	0.00259315	0.00927594	0.0116386	0.00158471
Peptide251	TASDTDSSY[+80]C[+57]IPTAGMSPSR	Q13480	GAB1	pY373	0.000258221	0.000410277	9.79148e-05	6.74908e-05	9.76108e-05		0.00022747	0.000126248	0.000911487		7.17664e-05	3.95047e-05		4.85131e-05	7.13042e-05	0.000149348		0.000205569			0.000168295	0.000136154	5.71738e-05	0.000144032	0.000173219	0.000205785	5.60166e-05	9.42214e-05	0.000201279	0.000133602	4.51745e-05
Peptide275	VDY[+80]VVVDQQK	Q13480	GAB1	pY659	0.00755744	0.0151983	0.00558287	0.00227619	0.00299353	0.000855135	0.0135534	0.00608558	0.0755332	0.00100592	0.00164622	0.00332954	0.00205956	0.00319482	0.00199309	0.00860826	0.00322652	0.00197217	0.00543049	0.00583758	0.0245234	0.00757523	0.0026405	0.00645217	0.0149256	0.0104126	0.00226194	0.00238992	0.00486824	0.012068	0.00113702
Peptide39	DSTY[+80]DLPR	Q9UQC2	GAB2	pY266	0.00123143	0.00125777	0.000975921	0.00115618	0.00118208	0.00106822	0.00113441	0.00110582	0.00160207	0.000865797	0.00100898	0.000991716	0.00117189	0.0009085	0.00103984	0.00114663	0.00110784	0.000945114	0.0010143	0.00129028	0.00127243	0.000889934	0.00107251	0.000995205	0.000948593	0.00100181	0.000807943	0.000912354	0.0012162	0.00106896	0.000975247
Peptide188	NY[+80]VTPVNR	P62993	GRB2	pY209	0.00045057	0.00071467	0.001031	0.000476343		0.000641128	0.00038275	0.000535518	0.00074958	0.000297319	0.00033151	0.000385743	0.000345342	0.00086429	0.000540489	0.00057981	0.000281871	0.00050915			0.00136297	0.000427514	0.00050851	0.00115652	0.000427283	0.000723718	0.00035797	0.000368259	0.000300996	0.000669671	0.000435776
Peptide87	GEPNVSY[+80]IC[+57]SR	P49840	GSK3A	pY279	1.40473	0.941546	0.549235	0.427311	0.580316	0.4554	1.25924	0.493474	1.80344	0.196991	0.846451	0.402222	0.321754	0.598498	0.757069	1.72128	0.153049	0.545551	0.684828	0.411349	1.21936	1.13735	0.82132	0.676305	0.814684	1.20001	0.465132	0.473508	0.723511	1.477	0.372841
Peptide256	TLDNGGFY[+80]ISPR	P08631	HCK	pY209	0.000800399	0.000594435	0.00104825	0.00103726	0.0010366	0.00243253	0.00131557	0.000997426	0.00173878	0.000261396	0.000854484	0.00124211	0.00206399	0.00115055	0.00152691	0.000707026	0.00368154	0.00177757	0.00318746	0.00307402	0.00106768	0.00129862	0.00128246	0.00157136	0.00249642	0.000539945	0.00135246	0.000993153	0.00199569	0.00304669	0.00162391
Peptide173	MDY[+80]VEINIDHK	Q00341	HDLBP	pY437					0.00189429	0.000310043	0.0145164	0.000560994	0.00059211	0.000880589	0.000148436	0.000306987	0.000422646	0.000371425		0.00120064	0.00520199		0.000279742	0.000473213	0.000971146	0.000495665	0.0071243		0.00096782	0.000964962	0.000639737		0.000863755		0.00209747
Peptide63	ELY[+80]GEVIR	Q92835	INPP5D	pY221	0.000214266	0.00330723	0.00463684	0.000214937	0.00202152	0.000122803	0.000929712	0.00479103	0.000318795	0.00146614	0.000189418	0.000214054	0.00017818	0.00105062	0.00306973	0.000801642	0.000578891	0.00341039	9.47637e-05	0.000482484	0.00226269	0.000678409	0.000494991	0.00403005	0.00352554	0.000915604	0.00395578	0.00293924	0.00467693	0.0014877	0.00354332
Peptide164	LY[+80]DFVK	Q92835	INPP5D	pY865	0.0717462	0.0255004	0.604359	0.0200741	0.0368811	0.022448	0.0495697	0.0143252	0.103792		0.179159	0.0558979			0.233199	0.0148023	1.57902	0.0114173	0.0150595		0.140266	0.130231	0.267632	0.0203992	0.115763	0.0155039	0.00872829		0.0134293	0.358713
Peptide15	APYTC[+57]GGDSDQY[+80]VLMSSPVGR	Q9Y4H2	IRS2	pY823	0.0133263	0.00555205	0.00267937	0.0206841	0.0111936	0.00145346	0.00577296	0.00623607	0.0282975		0.00577272	0.00129374	0.0020546	0.00125866	0.00422909	0.00189745		0.004855	0.00103328	0.00216356	0.00548669	0.00546088	0.00141223	0.0101461	0.00985607	0.00404094	0.00501258	0.00298061	0.0104794	0.00347486	0.00442004
Peptide302	WDTGENPIY[+80]K	P05556	ITGB1	pY783	0.001544	0.00315459	0.00225947	0.00200778	0.00165824	0.00151901	0.00198583	0.00111973	0.00641567	0.000962035	0.00151634	0.00169053	0.00233172	0.00148516	0.00213697	0.00310108	0.00117463	0.001148	0.00166318	0.00158282	0.0025039	0.00273312	0.0022872	0.00385651	0.000997502	0.00331873	0.000942875	0.00121743	0.00124831	0.00227034	0.00200182
Peptide46	DY[+80]STLTSVSSHDSR	P16144	ITGB4	pY1510	0.00268295	0.0023691	0.000617904	0.000609648	0.0008267	0.000792393	0.00166905	0.00153359	0.00669733	0.000487297	0.00113749	0.0011454	0.00137795	0.00149269	0.0013563	0.00187954	0.000248667	0.000668483	0.000414492	0.000557908	0.00223303	0.00105	0.00111916	0.000665945	0.00172166	0.00195074	0.00111908	0.000509132	0.00103818	0.00345267	0.00140126
Peptide272	VC[+57]AYGAQGEGPY[+80]SSLVSC[+57]R	P16144	ITGB4	pY1207	0.0194343	0.0142984	0.00496606	0.00485151	0.0253436	0.00173183	0.0148179	0.00807217	0.022681	0.00143653	0.00459194	0.0027877	0.00102913	0.00519555	0.0131841	0.00487709		0.0027021	0.000880832	0.000998137	0.00954034	0.00449675	0.00624449	0.00441069	0.0126056	0.0131721	0.00345951	0.00281248	0.0115745	0.0233822	0.00643235
Peptide53	EEPEALY[+80]AAVNK	Q9NZM3	ITSN2	pY968	0.00139565	0.000987907	0.00184131	0.000564694	0.000899987	0.000679856	0.00180405	0.00113	0.00196489	0.000172959	0.000582528	0.000968256	0.00061009	0.000289034	0.00114082	0.000291295	0.000324494	0.000593565	0.00104171	0.000759441	0.000830016	0.00076692	0.00157292	0.00105209	0.000872136	0.000594958	0.00074183	0.000315365	0.00136915	0.001235	0.000650171
Peptide155	LIY[+80]LVPEK	Q9NZM3	ITSN2	pY553	0.000938393	0.000722633	0.000681508	0.000720845	0.00144218	0.000485631	0.00155021	0.00085447	0.0013234	0.000348109	0.000451297	0.000603113	0.000535039	0.000613614	0.000803934	0.000445254	0.000774576	0.00051591	0.000620294	0.000449321	0.000626456	0.000586327	0.000497137	0.000585229	0.00122123	0.000665536	0.000506198	0.000429329	0.000698055	0.0014934	0.000450332
Peptide208	REEPEALY[+80]AAVNK	Q9NZM3	ITSN2	pY968	0.000969341	0.000589528	0.00121794	0.000437911	0.000706341	0.000570329	0.00142256	0.000862509	0.00202071	0.000359289	0.00155558	0.000788714	0.000486652	0.000480359	0.00110025	0.000186786	0.000990208	0.000680508	0.000673555	0.000467843	0.000587455	0.000896533	0.00152407	0.00116782	0.00104	0.000805774	0.000762182	0.000547809	0.00141809	0.00120254	0.000756409
Peptide42	DWSHY[+80]FK	P05783	KRT18	pY129	0.000300935	0.000251852	0.000226901	0.000216	0.000234731	0.000254515	0.000226054	0.000245332	0.000232075	0.000211168	0.000203418	0.000193233	0.000210383	0.000212833	0.000242319	0.000204385	0.00266409	0.000198935	0.000214746	0.000206713	0.000189259	0.000210939	0.000205424	0.00015974	0.000174069	0.00023787	0.000175959	0.000177248	0.000196816	0.000224306	0.000215057
Peptide48	DYSHY[+80]YTTIQDLR	P08727	KRT19	pY130	0.000485505	2.3024e-05		0.00011003	0.00564931	0.000264725	0.00116089		0.000196248	7.07679e-05	0.000123996	4.83201e-05	0.000102321	2.57619e-05	0.000655182	0.000158074	0.00192504		0.000160739	1.83943e-05	7.79331e-05	0.000218632	0.00437036	2.57151e-05	0.000163578	0.000293053	9.71276e-05	0.000168371	0.000106742	0.000146605	0.000173847
Peptide17	AQY[+80]EDIANR	O95678	KRT75	pY327	0.00223108	0.0005093	0.000543782	0.000412704	0.000590957	0.000444109	0.000601057	0.000550807	0.000923603	0.000584618	0.000442751	0.000953002	0.000430685	0.00107409	0.000620562	0.00058787	0.000824537	0.000600552	0.000564853	0.000495569	0.00127281	0.000527274	0.000559798	0.000436789	0.000567114	0.000399573	0.00055934	0.00135018	0.000370522	0.000435226	0.000572124
Peptide153	LIEDNEY[+80]TAR	P06239	LCK	pY394	0.116581	0.0464452	0.151443	0.0714775	0.0626728	0.0440995	0.096195	0.0853311	0.319806	0.00409424	0.0472833	0.0347162	0.0621365	0.0369199	0.107631	0.0594677	0.0506966	0.0295366	0.0667036	0.0439057	0.0845794	0.0701777	0.103105	0.0894776	0.039018	0.0540602	0.0444557	0.038795	0.077229	0.109325	0.0339803
Peptide179	NLDNGGFY[+80]ISPR	P06239	LCK	pY192	0.00421957	0.00200393	0.00466911	0.00217785	0.00451703	0.00399286	0.00438503	0.00963568	0.00513283		0.00250046	0.00191969	0.00707261	0.00268218	0.00760339	0.00167835	0.00480225	0.00285513	0.00363979	0.00718645	0.00305441	0.00457056	0.00593789	0.00358871	0.00303444	0.00149138	0.00499754	0.0036209	0.0144938	0.0136414	0.0014316
Peptide244	SVLEDFFTATEGQY[+80]QPQP	P06239	LCK	pY505		0.00750138	0.00490434	0.403132	0.0315152	0.0348269	0.0168183	0.0362394	0.0314163	0.000484128	0.00782109	0.00372665	0.0491213	0.00282574		0.00277451	0.0037438		0.00283712	0.00400128	0.0048933	0.0059669	0.0208099		0.0144041	0.0133018	0.00771512	0.00342946	0.0273898	0.204072	0.00279699
Peptide177	NHQLY[+80]C[+57]NDC[+57]YLR	Q8WWI1	LMO7	pY1667	0.000852411	0.000625578	0.00155225		0.000944921	0.000837387	0.000404906	0.000616336	0.00122653	0.000702251	0.000606183	0.000550518	0.000450511	0.00116093	0.000983435	0.000448898	0.001068	0.000747304	0.00078698	0.000625728	0.0014313	0.0013508	0.000715437	0.00138381	0.00105652	0.000710833	0.000717929	0.000435586	0.000792618	0.0012496	0.000912509
Peptide222	SGDLPY[+80]DGR	Q86X29	LSR	pY586	0.000433244	0.0010716	0.000474942	0.000548924	0.000321515	0.000278523	0.000278838	0.000515449	0.000908119	0.00044972	0.000304631	0.000336667	0.00116357	0.000820187	0.000486825	0.000363286	0.000396854	0.000495642	0.000223883	0.00036627	0.00108147	0.000399264	0.000296282	0.000201453	0.000437166	0.000999902	0.000294783	0.000240316	0.000231547	0.00065436	0.000588222
Peptide241	SSSAGGQGSY[+80]VPLLR	Q86X29	LSR	pY372	0.00230794	0.00653713	0.00262494	0.00102421	0.00171118		0.00198874	0.00212379	0.00360081	0.00232024	0.00146738	0.00203145	0.0035854	0.00196679	0.00263774	0.00170554	0.000338078	0.00283436	0.00117095	0.00098709	0.00453588	0.00256771	0.000909692	0.00136882	0.00216	0.00712244	0.00122377	0.00135353	0.000892807	0.00525296	0.00660506
Peptide340	YYGY[+80]TGAFR	P02788	LTF	pY547	0.000222957	0.000796953	0.00076563	0.00095937	0.000989431	0.00213881	0.00119245	0.000574604	0.000677601	0.0011581	0.00109167	0.00280933	0.00133926	0.000748914	0.000524419	0.00111955	0.000635617	0.00122031	0.00104881	0.00292326	0.000972503	0.000885033	0.000624386	0.000897873	0.00619022	0.00047996	0.00272933	0.00149025	0.00055182	0.0027689	0.00494142
Peptide54	EEPIY[+80]IITEYMAK	P07948	LYN	pY316				0.0187984	0.0427872	0.0031376	0.00726582	0.00306098		0.00151071	0.0015476	0.00188276	0.00132179	0.00200208			8.85472e-05		0.000922071	0.0019465	0.0038683	0.00184353	0.00492528		0.00255922		0.00254791	0.00402137	0.00197249	0.0497564	0.00243426
Peptide163	LY[+80]AVVTR	P07948	LYN	pY306	0.00137891	0.000872388	0.00389892	0.000828696	0.00302944	0.0011909	0.00161979	0.00175436	0.00271797	0.000562849	0.000685599	0.000945604	0.000674076	0.000862273	0.00149174	0.00115042	0.000400979	0.00100524	0.00103846	0.000979865	0.00145397	0.000935989	0.00120097	0.00143982	0.00160161	0.00115323	0.000947596	0.00078501	0.000945799	0.00146939	0.00122533
Peptide225	SLDNGGYY[+80]ISPR	P07948	LYN	pY194	0.00130687	0.000510092	0.00234285	0.000796046	0.00343604	0.000948992	0.00140897	0.000891853	0.00317102	0.00028241	0.000848451	0.000857338	0.000990693	0.00115363	0.00195085	0.00135378	0.00142445	0.00111242	0.00171147	0.00124421	0.00151301	0.00098621	0.00100645	0.00110521	0.00182346	0.000812328	0.000613243	0.000554582	0.000893765	0.0020434	0.00083394
Peptide277	VENC[+57]PDELY[+80]DIMK	P07948	LYN	pY473	0.00246286	0.00237754	0.00938888	0.0028393	0.0158726	0.00894265	0.00441647	0.00364622	0.00738096	0.00120343	0.00229117	0.00389783	0.00494982	0.00380505	0.0065826	0.00262587	0.00690178	0.00252426	0.00586006	0.00898654	0.0032716	0.00534462	0.00404166	0.00243315	0.00438937	0.00137966	0.00139853	0.00141425	0.00419899	0.00552202	0.00360097
Peptide283	VIEDNEY[+80]TAR	P07948	LYN	pY397	0.0117144	0.00507177	0.0565801	0.0169485	0.0236281	0.0309426	0.010327	0.00743016	0.0940039	0.00403437	0.0108241	0.0399205	0.0467455	0.0136599	0.0186478	0.0164454	0.114503	0.0208546	0.0393224	0.0369029	0.0151313	0.0202443	0.0327569	0.0189464	0.0194904	0.00564118	0.00696185	0.0103046	0.00707377	0.0372201	0.0188372
Peptide270	VADPDHDHTGFLTEY[+80]VATR	P28482	MAPK1	pY187	0.468801	0.306673	0.057017	0.0897952	0.0646489	0.0380066	0.1832	0.0799247	0.172043	0.0103041	0.0459855	0.124419	0.0296187	0.0206118	0.225387	0.0162299			0.484635	0.31988	0.281392	0.139565			0.143475				0.163589	0.256947
Peptide269	VADPDHDHTGFLT[+80]EY[+80]VATR	P28482	MAPK1	pT185;pY187	0.182202	0.10992	0.583764	0.133165	0.0376423	0.0474417	0.14825	0.772502	0.489686	0.0128019	0.0958971	0.0435975	0.0127413	0.0154646	0.434277	0.0422667	0.0142843	0.0511388	0.0403993	0.367881	0.273911	0.219295	1.951	0.27134	0.0726921	0.0533038	0.00815452	0.0602167	0.124845	0.0826787	0.0459428
Peptide250	TAGTSFMMTPY[+80]VVTR	P53779	MAPK10	pY223	0.0062941	0.0022149	0.00450583	0.00322883	0.0102176	0.00182967	0.00537358	0.00270385	0.00458538	0.000674563	0.00053867	0.00144898		0.000317122	0.00506269	0.00105939		0.00288325	0.00217226	0.00111186	0.00454874	0.00354952	0.0031863	0.00466888	0.0020323	0.00270566	0.00163852	0.0012428	0.00226688		0.00831954
Peptide249	TAGTSFMMT[+80]PY[+80]VVTR	P53779	MAPK10	pT221;pY223	0.000559251	0.000643278		0.000643876	0.000683592		0.00137477	0.000377714	0.00117999	0.00112942	0.00241313		0.00011201						0.0062774			0.00149232			0.00763063			0.000112855	0.00104263	0.00192958	0.000472402
Peptide190	QADEEMTGY[+80]VATR	Q15759	MAPK11	pY182	0.00356765	0.0033995	0.00296545	0.00446082	0.00628814	0.00288976	0.00383125	0.0203996	0.00615776	0.000435752	0.00283466	0.00117522	0.00287852	0.00400571	0.00466955	0.010358	0.00221928	0.00464104	0.00871594	0.0178533	0.00777533	0.0113116	0.00952373	0.00855307	0.00291041	0.00318845	0.00253266	0.00274066	0.00989334	0.002641	0.0016874
Peptide191	QADSEMTGY[+80]VVTR	P53778	MAPK12	pY185	0.00333554	0.00336851	0.0067036	0.00233637	0.00582845	0.00242951	0.00568215	0.00187758	0.00927499	0.000462875	0.00262067	0.00227182	0.00210294	0.00178376	0.00794789	0.0158064	0.000264732	0.00236679	0.00652742	0.0109565	0.00861467	0.00382079	0.0116242	0.0141602	0.00207865	0.00178843	0.00161182	0.00244662	0.0106977	0.00243207	0.00220552
Peptide115	HADAEMTGY[+80]VVTR	O15264	MAPK13	pY182	0.0246999	0.015805	0.00647216	0.00224342	0.0253366	0.00371289	0.0304156	0.02092	0.0112157	0.0012644	0.00189142	0.0277487	0.00306456	0.0565585	0.0108274	0.0139348	0.00148874	0.00361699	0.0142316	0.00826741	0.0133341	0.00685034	0.00974515	0.00199147	0.0206054	0.0113221	0.00684251	0.0017984	0.0151529	0.00604366	0.00194781
Peptide114	HADAEMT[+80]GY[+80]VVTR	O15264	MAPK13	pT180;pY182	0.000839465	0.000584969	0.00123698	0.000159797	0.00201043	0.000335867	0.00368927	0.0020955	0.000889586	0.000158029	0.000190505	0.00424028	0.000290515	0.00907477	0.00360203	0.00120706	0.000317217	0.001131	0.000342055	0.00022915	0.00191488	0.000757662	0.00271403	0.000312792	0.00179683	0.000616328	0.000943095	0.000315118	0.00106581	0.00026429	0.000207873
Peptide123	HTDDEMTGY[+80]VATR	Q16539	MAPK14	pY182	0.00557991	1.3753		0.97147	1.32821	0.932884	3.05372	1.38802	0.331821	0.122626	0.911866	8.53434	1.14731	2.64973	1.72225	0.126569	1.43111	0.652467	8.77832	3.56139	1.50638	3.8274	4.3052	6.19264	3.14459	3.34774	0.766217	1.63987	4.81998	1.83992	0.2545
Peptide122	HTDDEMT[+80]GY[+80]VATR	Q16539	MAPK14	pT180;pY182	0.0172808	0.00508227	0.0186556	0.00607882	0.00590089	0.00686606	0.0208281	0.0150441	0.0232893	0.000916139	0.00294676	0.0161881	0.00124538	0.0149302	0.0191718	0.00667635	0.00220416	0.0101591	0.0022326	0.0051859	0.020052	0.0283651	0.0326619	0.0251599	0.00717198	0.00641184	0.00736746	0.00418406	0.0127642	0.007803	0.00649816
Peptide126	IADPEHDHTGFLTEY[+80]VATR	P27361	MAPK3	pY204	1.48386	0.331634	0.124598	0.0753119	0.158586	0.0442689	0.279797	0.11966	0.359769	0.00809798	0.0942019	0.367875	0.0490396	0.0227432	0.303449	0.0159791	0.0092027	0.156539	0.479067	0.269772	0.311965	0.0911302	0.197066	0.265605	0.247024	0.179441	0.0252685	0.00579034	0.0927822	0.336184	0.109518
Peptide125	IADPEHDHTGFLT[+80]EY[+80]VATR	P27361	MAPK3	pT202;pY204	0.0442227	0.0130805	0.0907981	0.0166459	0.00954962	0.00660306	0.0404428	0.0133272	0.04108	0.000994351	0.00513758		0.000927587	0.00183196	0.0274826	0.00138258	0.0017002	0.0163836	0.00267122	0.00907098	0.0209547	0.0377275	0.0516818	0.0528852	0.00932578	0.0131429	0.00251043	0.00510149	0.0126618	0.012935	0.0107854
Peptide94	GLC[+57]TSPAEHQYFMTEY[+80]VATR	Q13164	MAPK7	pY221						0.00882385	0.0201754	0.0454506	0.0348272	0.00770465	0.00311844	0.0100104	0.00911949	0.00784597		0.0141659	0.00226654		0.0492893	0.0182672	0.013565	0.038581	0.0699569		0.0259309				0.0141664
Peptide248	TAC[+57]TNFMMTPY[+80]VVTR	P45984	MAPK9	pY185	0.0203749	0.00594847	0.00602747	0.00317348	0.0111102		0.0075817	0.00380206	0.00425308	0.000548029	0.00116606	0.00271152		0.0021678	0.0388357			0.00817683			0.00286399	0.00318399	0.00839382	0.0173563	0.00150497	0.00211936			0.00350109		0.0035178
Peptide187	NQGAHDPDY[+80]ENITLAFK	Q8IX19	MCEMP1	pY38					0.00492371	0.00109178	0.00135436		0.00109738	0.000859271	0.00128596	0.00141846	0.000220847	0.00069627		0.0044216	0.000311393		0.000503442	0.000772129	0.000940905	0.000724966			0.00024265			0.00446542			0.00378072
Peptide65	EQY[+80]DVPQEWR	Q9UKN1	MUC12	pY5413	0.000367139	0.000662121	0.000797899	8.86956e-05	0.000163943	0.000533305	0.000315458	0.00034138	0.0013142	0.000124145	0.000113161	0.000297752	0.000117043	0.0023754	0.000272214	0.000980939	0.000286155	0.000514129	0.000117673	9.13439e-05	0.000607939	0.000624453	0.00215535	0.000648639	0.00100972	0.00106888	0.000519975	0.00113968	0.000258511	0.000249803	0.000577607
Peptide36	DSQMQNPY[+80]SR	Q9H3R2	MUC13	pY501	0.00295934	0.00351214	0.0638003	0.00254142	0.00131784	0.000782943		0.000930277		0.00167681	0.00126989	0.00276238	0.000782663	0.00657501	0.000810514	0.00242093	0.000612027	0.00378598	0.00140239	0.0292172	0.0120161	0.00419524	0.000685917	0.000674833	0.00160166	0.00398545			0.00176591	0.00694517	0.00605059
Peptide310	Y[+80]IDLDK	Q9BRK3	MXRA8	pY429		0.00144751		0.00157675				0.000990339	0.0017647	0.00210426	0.00203938	0.00645112					0.00237688			0.00383991		0.00242857	0.00356366	0.00527377	0.000868955	0.000533943	0.000910137	0.00388969	0.00123697
Peptide9	ALELDPNLY[+80]R	P35580	MYH10	pY761	0.000668883	0.00266071	0.00179917	0.00049085	0.000293657	0.000381158	0.00131001	0.000201316	0.00237613	0.000394903	0.00153028	0.000557061	0.000405141	0.000904759	0.00130974	0.01537	0.0016458	0.00314983	0.00100046	0.00167673	0.00574925	0.00261823	0.000963809	0.00200269	0.0118869	0.0002154	0.000986624	0.0017447	0.00280104	0.000680338	0.000290106
Peptide58	EIENLTQQY[+80]EEK	P35749	MYH11	pY1408	0.00124083	0.000436458	0.00779773	0.00319218	0.000491742	0.000518589	0.00138899	0.000438586	0.00497211	0.000459613	0.0102342	0.00135775	0.0017607	0.0073707	0.00206262	0.345884	0.0271223	0.0229792	0.00587228	0.00106362	0.106278	0.022295	0.00134329	0.00255274	0.000785147	0.000376738	0.0024763	0.0122408	0.0157059	0.000597601	0.000329043
Peptide82	FQKEIENLTQQY[+80]EEK	P35749	MYH11	pY1408	0.000342819	0.000271573	0.000276625	0.000270257	0.000366998	0.000267993	0.000274769	0.000319211	0.000316332	0.000319632	0.00026741	0.000251595	0.000310575	0.000253246	0.000292989	0.000461604	0.000270227	0.000301616	0.000282305	0.000285558	0.000338331	0.000246952	0.000314703	0.000279619	0.000281668	0.000254892	0.00028372	0.000259552	0.000416138	0.00026235	0.000340198
Peptide10	ALELDSNLY[+80]R	P35579	MYH9	pY754	0.00266335	0.00441508	0.0049895	0.00549324	0.00337674	0.00418187	0.00531	0.00250027	0.0106135	0.0051776	0.00859808	0.00959659	0.0052886	0.00659511	0.00850088	0.00623578	0.0116355	0.00663003	0.0114813	0.01615	0.00431108	0.0105492	0.00776087	0.0121245	0.00525601	0.00340434	0.00541427	0.0019347	0.00578097	0.0107504	0.00551234
Peptide178	NKDQGTYEDY[+80]VEGLR	P60660	MYL6	pY89	0.000427638	9.6788e-05			2.56347e-06	0.000268287		9.89015e-05	7.94135e-05	0.000221328	0.00015852			5.78733e-05	0.000407192		0.000208629					9.81025e-05	0.000213163	0.000782316	0.000230703	0.000136377			0.000271507	0.000323453	0.000261566
Peptide98	GNFNY[+80]VEFTR	P24844	MYL9	pY156	0.00169787		0.00162396	0.000948306			0.000534749	0.000871624	0.00112522		0.00158508				0.00151584	0.00443635		0.00202298	0.00094723		0.00276964	0.00264539	0.00121346	0.0051403			0.000482487	0.00233241	0.00365655	0.00143798	0.00200576
Peptide3	AEFAEY[+80]ASVDR	Q9NWQ8	PAG1	pY227	0.00582321	0.00334791	0.00915541	0.00442041	0.00695109	0.0125195	0.00622597	0.00396084	0.0230914	0.000963026	0.00354877	0.00891496	0.00957257	0.00215563	0.00996571	0.00116126	0.0120494	0.00472352	0.00949924	0.00381585	0.00406109	0.00651338	0.00931805	0.00550104	0.0131783	0.00353269	0.00272079	0.000926494	0.00369847	0.0208958	0.0106669
Peptide64	ENDY[+80]ESISDLQQGR	Q9NWQ8	PAG1	pY417	0.239777	0.455389	1.66367	0.624933	0.230597	1.06982	0.276461	1.00585	0.360729	0.0825409	3.05885	2.15031	0.808161	0.165947	1.18494	1.21511	0.127395	1.00272	3.71969	0.388943	0.77139	0.143142	0.972854	1.28187	1.20913	1.3245	0.12215	0.0237985	1.21847	0.911971	1.22412
Peptide223	SGQSLTVPESTY[+80]TSIQGDPQR	Q9NWQ8	PAG1	pY341	0.00115955	0.000731142	0.00557036	0.000922691	0.0021969	0.00310649	0.00137704	0.000889986	0.0116958	0.000335562	0.000795874	0.00533103	0.00476204	0.00124442	0.00321705	0.00142781	0.00859345	0.00326816	0.00360655	0.00150765	0.00180414	0.00251921	0.00456354	0.00353382	0.00254604	0.000679389	0.00106704	0.00127501	0.00152914	0.00787502	0.00377731
Peptide305	Y[+80]AALSDQGLDIK	Q8WX93	PALLD	pY1348	0.00037716	0.000422466	0.000302648	0.000234629		9.06645e-05	0.000308449	0.000191248	0.000307901			0.000221795	0.000457226		0.000809396	0.000754706	0.00260178	0.00806296	0.000337663	0.000260196	0.000294411	0.000632932	0.00060092	0.00103971	0.000446856	0.000914064	0.00039879	0.000548855	0.000759632	0.00090844	0.00164854
Peptide41	DVTIGGSAPIY[+80]VK	Q8TEW0	PARD3	pY489	0.00240255	0.00199067	0.00241308		0.0014842	0.00106221	0.00193495	0.00199947	0.00155744		0.000942984	0.0019021	0.000750335			0.00280059	0.00250116		0.000608056	0.00356076	0.00678631		0.000553172		0.00154494	0.00284537	0.00339058				0.00383833
Peptide66	ERDY[+80]AEIQDFHR	Q8TEW0	PARD3	pY1080	0.00337601	0.00196321	0.000223989	0.000786249	0.00017585	0.000236468	0.00206312	0.00126737	0.00203005	4.14243e-05	0.000153934	0.000192178	0.000199109	0.000123391	0.000576633	0.000131	2.40018e-05	0.000135147	0.000281994	0.00017658	0.000310389	0.000315705	0.00043617	0.000339186	0.00111963	0.00105704	0.000274467	5.36421e-05	0.000285721	0.000717994	0.000304269
Peptide25	DGHPLSPERDHLEGLY[+80]AK	Q8TEW8	PARD3B	pY1000	0.0166898	0.00228027	0.00328997	0.00117715	0.000866749	0.000814186	0.00149113	0.00176765	0.015772	0.000425858	0.000517293	0.00228071	0.000614001	0.00100337	0.00135024	0.00146198	0.000871518	0.000637183	0.00164337	0.00075953	0.00127276	0.00171341	0.00118584	0.00256656	0.00263572	0.00128186	0.00139061	0.000643408	0.00138887	0.00287955	0.00142007
Peptide28	DHLEGLY[+80]AK	Q8TEW8	PARD3B	pY1000	0.00208455	0.000905539	0.000801592	0.00124785	0.000501606	0.000392314	0.00117316	0.00105958	0.00612307	0.000313204	0.000457894	0.00124126	0.000826529	0.000902728	0.000795737	0.000780559	0.000595782	0.000357883	0.00147287	0.000636964	0.00107062	0.00075062	0.000541822	0.00130083	0.00106131	0.000651253	0.000703956	0.000407642	0.00064232	0.00116172	0.000725295
Peptide327	YADIESSNY[+80]MAPYDNYVPSAPER	P09619	PDGFRB	pY771		0.000118106				9.32073e-05	0.000163322	0.000333252	0.000137568	0.000124695	0.00019736	0.00017473	0.000107517	0.00267405					0.000262389	5.98138e-05	8.51166e-05	0.000321077	0.000337322		0.000113264	0.000166039	6.58249e-05		0.000149714	0.000395169	0.000267921
Peptide331	YHGHSMSDPGVSY[+80]R	P08559	PDHA1	pY301	0.000756431	0.000749884	0.000750292	0.000487222	0.00124202	0.00134107	0.00149274	0.00118551	0.00141856	0.000576835	0.000612165	0.00105624	0.00121508	0.00123254	0.00114995	0.0014178	0.00136617	0.00166378	0.00128461	0.001832	0.00182409	0.00252808	0.00171579	0.00130512	0.000721235	0.000652195	0.000565968	0.00100592	0.00509298	0.00105442	0.000779356
Peptide290	VTPPEGY[+80]EVVTVFPK	O00151	PDLIM1	pY321	0.00101925	0.000483645	0.000558602	0.000223543	0.000358509		0.000761832	0.000339588	0.000626084		7.22189e-05	0.000141572		0.000173002	0.000432192	0.000138713	0.000603768				0.000537681	0.000173834	0.000455127	0.000974655	0.000261542	0.000324723	0.000225659	0.000366291	0.000346622	0.000265438	0.000293953
Peptide112	GY[+80]FFLDER	P50479	PDLIM4	pY293	0.000555064	0.000690324	0.000598895	0.000635764	0.00053681	0.000505524	0.000562792	0.000665129	0.000567869	0.000465027	0.000540078	0.000489922	0.000629016	0.000458139	0.000485421	0.00061817	0.000464959	0.000484699	0.000566862	0.000542273	0.000562582	0.000472184	0.000491479	0.000486714	0.000557746	0.000492362	0.000499928	0.000432442	0.000491385	0.000536978	0.000499829
Peptide273	VDLGSEVY[+80]R	P50479	PDLIM4	pY191	0.000144542	8.50947e-05	0.000177343	0.000166537	7.07512e-05	4.9372e-05	0.000117094	0.000110021	0.00049195	8.96948e-05	0.00012823	0.000177683	0.000104055	9.77417e-05	0.000166112	0.000250953	0.000104088	0.000111409	0.000132186	0.000138554	9.96708e-05	0.000195565	0.000201011	0.000366391	0.000134019	6.67279e-05	8.1565e-05	0.000146914	0.000167333	6.88934e-05	8.67393e-05
Peptide336	YTEFY[+80]HVPTHSDASK	Q96HC4	PDLIM5	pY251	0.0005007	0.000324666	0.000325939	0.000462246	0.000276773	0.000182358	0.000496489	0.000378659	0.000677573	0.000179	0.000332668	0.000325301	0.00022907	0.000297938	0.00057564	0.000226371	0.000329731	0.00036057	0.000399815	0.000411516	0.00041336	0.000550916	0.00124167	0.00124831	0.000633883	0.000377282	0.000384304	0.00030779	0.000479382	0.000591815	0.000502305
Peptide323	Y[+80]SSMAASFR	Q13113	PDZK1IP1	pY83	0.00218248	0.00314195	0.0774586	0.000974782	0.00146921		0.00133931	0.000846208	0.00576823	0.000891976	0.00251327	0.00112193		0.0029583	0.00182955	0.00327258		0.00335905	0.00302649		0.00786042	0.00103033	0.000580546	0.00165934	0.0016372	0.00472124	0.00170006	0.00175782	0.00108643	0.00700223	0.00392272
Peptide151	LGLDY[+80]EER	Q99623	PHB2	pY128	0.000312495	0.000523221	0.000260661	9.657e-05	0.000674513	0.000360202	0.000747648	0.000668649	0.000152898	7.24626e-05	4.84941e-05	0.000339733	0.000153708	0.000140581	8.47281e-05	0.000414672	0.000299724	8.085e-05	0.000422312	0.000239305	0.000490504	6.74281e-05	0.000301137	3.5136e-05	0.000512394	0.000428664	0.000126081	0.000115074	0.000101738	0.000329883	0.000341285
Peptide328	YAGEVY[+80]GMIR	P42356	PI4KA	pY1154	0.00127615	0.000485915	0.000513138	0.000402845	0.000666889	0.000709924	0.000590004	0.000624277	0.000920077		0.000682517				0.00159135	0.000608457	0.000327058		0.000452986	0.000938546	0.00169431	0.00142089	0.00115426	0.00212772	0.00128319	0.000998684	0.000367039	0.00050491	0.00074261	0.00123015
Peptide276	VEFGVY[+80]ESGPR	Q6ZUJ8	PIK3AP1	pY694	0.000227913	0.000315719	0.00130317	0.000406996	0.000785254	0.00128702	0.000589728	0.00046905	0.00109303	0.000271953	0.000827713	0.00556084	0.00321681	0.0010158	0.000443002	0.000650806	0.00349178	0.00135903	0.00201434	0.00335995	0.00148831	0.000796712	0.00168453	0.00129477	0.000958594	0.00129159	0.000259715	0.00104721	0.000290752	0.000885118	0.00293071
Peptide35	DQY[+80]LMWLTQK	P27986	PIK3R1	pY580	0.00248491	0.00270184	0.00233783	0.00102472	0.00209505	0.00144513	0.00240961	0.00211157	0.00271074	0.00127737	0.00149039	0.00267032	0.00254147	0.00177302	0.00253728	0.00247412	0.00113265	0.00216613	0.00132405	0.00217745	0.00274977	0.00222068	0.00357687	0.00272918	0.00190073	0.00197929	0.00228021	0.00193296	0.00303344	0.00209362	0.00339057
Peptide71	EYDRLY[+80]EEYTR	P27986	PIK3R1	pY467	0.00155273	0.00149949	0.00121945	0.000808096	0.000967777	0.00111222	0.000982589	0.00249276	0.00163692	0.00114893	0.00150936	0.0013478	0.000959535	0.000863018	0.00167473	0.000951492	0.000103486	0.00150632	0.00256691	0.00229866	0.0013025	0.00179488	0.00268092	0.00152296	0.00202986	0.00116012	0.00161096	0.000669293	0.00204873	0.00238602	0.00256525
Peptide152	LHEY[+80]NTQFQEK	P27986	PIK3R1	pY452	0.000298007	0.000397943	0.00032368	0.000271366	0.000281742	0.000360075	0.000356206	0.000362307	0.000499965	0.000280393	0.000309124	0.000386533	0.000756932	0.000397115	0.000390602	0.000338448	0.000384257	0.000248092	0.000519627	0.000525324	0.000429744	0.000385927	0.00053285	0.000384298	0.000320393	0.00026759	0.000373217	0.000234804	0.000383985	0.000412112	0.000338763
Peptide167	LYEEY[+80]TR	P27986	PIK3R1	pY470	0.000491771	0.000698049	0.00061447	0.000647423	0.00041711	0.000498847	0.000596692	0.000806479	0.00108377	0.000454574	0.000547097	0.000624558	0.00323424	0.000723051	0.00106686	0.00108828	0.000575438	0.000367739	0.00126687	0.00146152	0.000981687	0.000868196	0.0013765	0.000944793	0.000665971	0.00051114	0.000721465	0.00050804	0.000628622	0.000811335	0.00059384
Peptide165	LY[+80]EEYTR	P27986	PIK3R1	pY467	0.00134664	0.00156422	0.00131893	0.00138441	0.00118524	0.00131853	0.00103463	0.00168812	0.00170711	0.000984775	0.00163204	0.000912768	0.00110954	0.00120866	0.00111688	0.00176554	0.000296747	0.00114525	0.00325102	0.0034687	0.00248182	0.00156368	0.00214002	0.00151784	0.00150993	0.00100817	0.00153403	0.0011596	0.00154983	0.00171957	0.00148831
Peptide260	TRDQY[+80]LMWLTQK	P27986	PIK3R1	pY580	0.00174186	0.000866401	0.00062282	0.00536187	0.00113893	0.000696498	0.000694936	0.000804424	0.00110816	0.00057121	0.000587804	0.000754848	0.00120786	0.00066508	0.0018915	0.000969112	0.000415887	0.00117177	0.000592056	0.000811117	0.000855252	0.000819737	0.00154626	0.00117376	0.000688222	0.000775136	0.000671744	0.000546564	0.00109908	0.00072769	0.00124498
Peptide70	EYDQLY[+80]EEYTR	O00459	PIK3R2	pY464	0.051841	0.0545605	0.0206945	0.0134102	0.0548732	0.0402851	0.0682676	0.0599984	0.0336968	0.0184493	0.0263433	0.095732	0.0149145	0.0200287	0.0308901	0.0296106	0.00819637	0.0201019	0.0372568	0.0270422	0.0461909	0.021941	0.0372917	0.0272963	0.0836939	0.0626623	0.025091	0.0167988	0.0214371	0.0592202	0.0247817
Peptide238	SREYDQLY[+80]EEYTR	O00459	PIK3R2	pY464	0.00182509	0.00366576	0.000883822	0.000767152	0.00304286	0.00153702	0.0034028	0.00446044	0.0031617	0.000571748	0.000428348	0.00405638	0.000498522	0.000732816	0.000919358	0.00113867	0.000119396	0.000984128	0.00137459	0.000724553	0.00246405	0.000957657	0.00127303	0.00117114	0.00330246	0.00190843	0.000861625	0.000336215	0.0013512	0.000980625	0.00118202
Peptide85	GDY[+80]PLEAVR	P14618	PKM	pY370	0.00340037	0.000853125	0.000727578	0.00108131	0.000805175	0.00183938	0.00112928	0.000698212	0.000702046	0.000579433	0.00028516		0.00450961	0.0035537	0.00076702	0.002171	0.00190024	0.00098199	0.0010606		0.00115766	0.00117028	0.0010894		0.000691491	0.000717605	0.000994339	0.000821275	0.000950118		0.000986452
Peptide252	TATESFASDPILY[+80]RPVAVALDTK	P14618	PKM	pY105					0.0123334	0.000132281	0.00253734	0.00239967	0.000781161	0.000917864	0.000615629	0.000659505		0.000223168			0.000208281		0.000111626		0.000804753	0.000240991	0.00203237		0.000435256		0.000759315		0.0014579		0.00548307
Peptide7	AHY[+80]THSDYQYSQR	Q99959	PKP2	pY161	0.00317691	0.00224089	0.0012773	0.00243049	0.00113047	0.00100981	0.00597961	0.00136856	0.00180384		0.000498133	0.00118123	0.000746539	0.000489547	0.00172679	0.000409043		0.000448678	0.00142446	0.000442979	0.00172221	0.000405663	0.00049968	0.000513486	0.000472145	0.00106493	0.000842172	0.000370908	0.000654427	0.00129184	0.000466387
Peptide118	HFDTY[+80]HR	Q99959	PKP2	pY217	0.00192538	0.00142815	0.00131888	0.00338434	0.00119461	0.00137051	0.00684988	0.00214354	0.00220418	0.000518473	0.000825866	0.00134641	0.0012469	0.000690731	0.00262977	0.000893005	0.000864243	0.000924387	0.00169154	0.000846663	0.00105023	0.00106522	0.000873691	0.00089208	0.000931375	0.00160129	0.00110301	0.000657429	0.00123613	0.00214368	0.000845878
Peptide265	TY[+80]DMLK	Q99959	PKP2	pY108	0.00095184	0.000810477	0.000791065	0.00137162	0.00090585	0.000872409	0.00313722	0.00113436	0.00163043	0.000444859	0.000503858	0.000809513	0.00126771	0.000752067	0.00326805	0.000582109	0.000691818	0.000584099	0.00117733	0.000605344	0.000993282	0.000669439	0.00103848	0.000531662	0.000758777	0.000873077	0.000539996	0.000465512	0.000752187	0.00135658	0.000608164
Peptide334	YSQNIY[+80]IQNR	Q99959	PKP2	pY631	0.0207599	0.00834886	0.0833898	0.00712572	0.00516774	0.00771459	0.0105904	0.0078916	0.0174379	0.000859342	0.00561596	0.00589444	0.00331702	0.0135394	0.0366678	0.000455131		0.0351223	0.0055449	0.000804941	0.0266135	0.00251019	0.0114445	0.0219306	0.00208984	0.00799493	0.0037	0.0213005	0.00677286	0.00748551	0.025783
Peptide1	ADY[+80]DTLSLR	Q9Y446	PKP3	pY176	0.00554801	0.00910731	0.00191889	0.00124273	0.00194703	0.00155336	0.0068859	0.00287905	0.0115955	0.000801014	0.00101798	0.0029087	0.00182456	0.000976385	0.00315284	0.00120717	0.000562837	0.00163608	0.00418819	0.000935483	0.00308227	0.00210748	0.00391448	0.00134645	0.00937126	0.00700175	0.00186319	0.000939806	0.00119837	0.0098633	0.00303221
Peptide104	GQY[+80]HTLQAGFSSR	Q9Y446	PKP3	pY84	0.00473082	0.00598185		0.00220188	0.00239281	0.00120026	0.00641904	0.00330754	0.00369754	0.000796567	0.000843399	0.00127055	0.00106714	0.000381645	0.00124641			0.00116074	0.0018552		0.00125276	0.000605983	0.000823343		0.00421101	0.00369041	0.00127238		0.000686825	0.00449753	0.00256057
Peptide181	NLIY[+80]DNADNK	Q9Y446	PKP3	pY390	0.0304761	0.192331	0.0159117	0.00979854	0.0174947	0.0124704	0.0351337	0.0829285	0.0527187	0.0314284	0.0221417	0.0281805	0.0445477	0.0946683	0.0207818	0.0829682	0.06296	0.018941	0.127349	0.0245873	0.0646216	0.031805	0.025634	0.0084138	0.105652	0.0958833	0.0445353	0.0179516	0.00663136	0.0912986	0.0843515
Peptide243	STTNY[+80]VDFYSTK	Q99569	PKP4	pY1168	0.00394005	0.00110354	0.000213937	0.000534103	0.000368187	0.000318605	0.00145393	0.00108185	0.00136625	0.000253344	0.00043358	0.000577661	0.000471196	0.000411885	0.000961043	0.00018983	0.000157485	0.000509295	0.00034461		0.000463221	0.000247482	0.000663349	0.000205625	0.00128773	0.000973087	0.000234032	0.0001545	0.000341796	0.00134238	0.000587653
Peptide139	IY[+80]EPLDVK	P47712	PLA2G4A	pY535	0.000649073	0.000714844	0.000922512	0.000841524	0.00174476	0.000497203	0.000686899	0.000779892	0.000479012		0.000697955	0.00157394	0.00183732		0.00299279	0.00110092	0.00175607		0.000679411		0.00191906		0.00113066		0.001247			0.00348168	0.00153391		0.00205609
Peptide134	IGTAEPDY[+80]GALYEGR	P19174	PLCG1	pY771	0.000697942	0.000493012	0.000882759	0.000475566	0.000386682	0.000182849	0.000527283	0.000441707	0.00160791	3.92142e-05	0.000306323	0.000435452	0.000369662	0.000160674	0.00040096	8.17661e-05	0.000114526	0.000210888	0.000211533	0.000292884	0.000451662	0.000179928	0.000792999	0.000660181	0.000532085	0.000364182	0.000252915	6.00081e-05	0.000593567	0.00079973	0.000440884
Peptide182	NPGFY[+80]VEANPMPTFK	P19174	PLCG1	pY783		0.00116439	0.00547177		0.000836662	0.000566335	0.000791759	0.000799892	0.00239266	0.000368793	0.000378967	0.000560587	0.00132878	0.000865745		0.00106605	0.00226085		0.00060922	0.000943984	0.00109088	0.000735798	0.000837433		0.000853803	0.000894027	0.000576511	0.000403025	0.000554663	0.000737094	0.000554534
Peptide317	Y[+80]QQPFEDFR	P19174	PLCG1	pY1253	0.00221091	0.00229936	0.00167458	0.00138091	0.00173681	0.000934574	0.00178178	0.00158809	0.00145888	0.00128383	0.00125596	0.00126469	0.00178414	0.00113245	0.00134892	0.00153898	0.00129196	0.00194043	0.00157486	0.00150207	0.00199214	0.00118393	0.000904857	0.00129148	0.00204177	0.00174199	0.00135063	0.00138901	0.000979401	0.00213882	0.00181138
Peptide219	SEDIY[+80]ADPAAYVMR	Q9Y2H5	PLEKHA6	pY492	0.0496916	0.0188802	0.00821253	0.00363173	0.0296162	0.00151659	0.0204039	0.015748	0.0285614	0.000666167	0.00217175	0.0149783	0.00214093	0.00275378	0.00907489	0.00182591	0.000882665	0.00315014	0.00384207	0.00106636	0.0154537	0.00264556	0.0102381	0.00882286	0.0190508	0.0122224	0.00510535	0.0015371	0.00244489	0.0220896	0.0147809
Peptide31	DLEY[+80]LDLK	Q6IQ23	PLEKHA7	pY665	0.00196709	0.00121887	0.00106269	0.000880563	0.001247	0.000958972	0.00159039	0.00152659	0.00167246	0.000740339	0.00076783	0.00092739	0.00119211	0.000982738	0.00238158	0.000864065	0.00127786	0.00061297	0.00093763	0.000681168	0.000970056	0.000834622	0.000903905	0.000836732	0.000865414	0.0011964	0.000888482	0.000839744	0.0010031	0.00134862	0.000840637
Peptide318	Y[+80]QTLPGR	Q6IQ23	PLEKHA7	pY1011	0.00204792	0.000472968		0.00101611	0.000298281		0.00291064	0.000871359	0.00161502			0.000285087	0.000286403		0.00148505				0.000590395		0.000643647	0.000140485	0.000161469		0.000454833	0.000502856			0.000201158	0.000535767
Peptide149	LEPQIASASEY[+80]AHR	O60664	PLIN3	pY95	9.20458e-05	0.000103211	0.000162742	4.37556e-05	8.32137e-05	0.000172445	9.28468e-05	3.85174e-05	0.000254682	5.63205e-05	7.11528e-05	0.000185057	6.68643e-05		7.20289e-05	8.57834e-05	8.28474e-05	8.82967e-05	0.000126399	7.85098e-05	6.23045e-05	7.96592e-05	6.81284e-05	9.44987e-05	7.21353e-05	0.000117053	2.374e-05	3.66005e-05	0.000127786	0.000155951	0.000149211
Peptide50	EATQPEPIY[+80]AESTK	Q86YV5	PRAG1	pY413	0.00071106	0.000345575	0.00125739	0.000452009	0.000202831	0.0001894	0.00102812	0.000393551	0.000580478	0.000161248	0.000289348	0.000827001	0.00042213	0.000165577	0.000519076	0.000128134	0.000136903	0.000198297	0.000474899	0.000283821	0.000470413	0.000129156	0.000838106	0.000939343	0.000986943	0.000259765	0.000301399	0.000280868	0.00043068	0.000131205	0.000293352
Peptide213	RSDSASSEPVGIY[+80]QGFEK	Q05655	PRKCD	pY313	0.269906	0.0983044	0.0481991	0.0144405	0.123486	0.00780121	0.0809955	0.0918943	0.146726	0.007182	0.00909058	0.0985042	0.0120081	0.0151254	0.102437	0.0380903	0.0181668	0.0427117	0.035744	0.0065524	0.0875225	0.0543493	0.0402732	0.0554172	0.0911618	0.088828	0.034613	0.0113507	0.0316876	0.138095	0.0262657
Peptide217	SDSASSEPVGIY[+80]QGFEK	Q05655	PRKCD	pY313	0.00648041	0.00206353	0.00136928	0.000581876	0.00290693	0.000325632	0.00191872	0.00183667	0.00413925	0.000229063	0.000303809	0.00197069	0.000604819	0.00047701	0.00183021	0.00157553	0.000467891	0.000622713	0.00133851	0.000507665	0.00228703	0.000829669	0.000651998	0.00103591	0.00150975	0.00148991	0.000563386	0.000354852	0.000580103	0.00236596	0.000556034
Peptide254	TGVAGEDMQDNSGTY[+80]GK	Q05655	PRKCD	pY334	0.0225155	0.00355867	0.00493467	0.00338513	0.00816014	0.00170542	0.00598619	0.00545741	0.0211608	0.000119675	0.000738788	0.00635881	0.00397534	0.000691542	0.00259885	0.00246975	6.53386e-05	0.000966063	0.00887726	0.00211073	0.00321372	0.00187436	0.00174855	0.00163843	0.00327867	0.00121376	0.00103152	0.000305118	0.000686751	0.00675594	0.00154096
Peptide146	LC[+57]DFGSASHVADNDITPY[+80]LVSR	Q13523	PRPF4B	pY849	0.885708	1.7681	0.235766	0.0261117	0.581043	0.181056	0.826174	0.530662	0.703006	0.261188	0.268732	0.464467	0.0928603	0.330957	0.567555	0.625012	0.00799317	0.183885	0.103616	0.27867	1.03646	0.272384	0.43419	0.864037	0.332153	0.756434	0.563655	0.283926	0.543334	0.317457	0.513009
Peptide332	YIEDEDYY[+80]KASVTR	Q14289	PTK2B	pY580	0.0089226	0.00266256	0.00459499	0.00174992	0.00645087	0.00409773	0.00394665	0.00506167	0.00346409	0.00103384	0.00202845	0.00269416	0.00230296	0.00288985	0.00395187	0.00229691	0.000707636	0.00241501	0.00459681	0.00398118	0.00297533	0.00163074	0.00612118	0.00416587	0.00269667	0.00115189	0.00239628	0.00148657	0.00420323	0.00227816	0.00202602
Peptide288	VSEKPSADY[+80]VLSVR	Q13882	PTK6	pY114	0.00577826	0.00578689	0.0045288	0.00202344	0.00612292	0.00215792	0.00797763	0.00361573	0.00462123	0.0024874	0.00248389	0.00441443	0.00261651	0.00583777	0.00703229	0.00345695	0.00349645	0.00463619	0.00263587	0.00196144	0.00475357	0.0039053	0.00274003	0.00517039	0.0040591	0.00753772	0.00543754	0.00521214	0.00338187	0.0105066	0.00542708
Peptide90	GHEY[+80]TNIK	Q06124	PTPN11	pY546	0.000620718	0.00076174	0.00136066	0.00112021	0.000845781	0.000890789	0.000872613	0.000486937	0.00151721	0.000453282	0.000633341	0.00062451	0.000598763	0.000571042	0.000839148	0.000972574	0.000470211	0.000545847	0.000733259	0.00120326	0.00112895	0.00112108	0.000778433	0.000871598	0.000590147	0.000648976	0.000487195	0.000490672	0.000601059	0.000892894	0.000748336
Peptide137	IQNTGDY[+80]YDLYGGEK	Q06124	PTPN11	pY62	0.00452851	0.0108082	0.00139363	0.0029696	0.00478836	0.00223775	0.00543609	0.00906358	0.00976744	0.00383027	0.00561659	0.0064926	0.00286708	0.00402728	0.00232672	0.000651036	0.000339053	0.00266424	0.00529112	0.000917158	0.00474098	0.00157308	0.00337799	0.00181461	0.0149982	0.00952606	0.00427283	0.00024194	0.00526388	0.00400773	0.00538969
Peptide295	VY[+80]ENVGLMQQQK	Q06124	PTPN11	pY584	0.00125621	0.00179282	0.0018206	0.00107576	0.00141677	0.000831036	0.0025648	0.0009771	0.00783918		0.00871918	0.00240002	0.00161552	0.00153504	0.00142304	0.00123338	0.00138186	0.0017983	0.00243986	0.00116219	0.00228003	0.00248556	0.00217264	0.00219477	0.00180091	0.000637591	0.000456704	0.00119042	0.00210688	0.00148355	0.00105305
Peptide215	SAEEAPLY[+80]SK	Q99952	PTPN18	pY389	0.000525961	0.000454361	0.000985384	0.00102694	0.000470183	0.00143494	0.00117331	0.000527548	0.00130637	0.000270776	0.000898582	0.0012234	0.0012152	0.000507214	0.000717209	0.000652326	0.00194248	0.000541863	0.00151998	0.00202552	0.000773912	0.00148728	0.0010641	0.0010881	0.000639099	0.000318068	0.000442754	0.000727543	0.000870035	0.000989622	0.000803151
Peptide220	SEQENPLFPIY[+80]ENVNPEYHR	P23467	PTPRB	pY1981	0.00309476	0.000972722	0.00759412	0.000813265	0.000742854	0.00058839	0.00133014	0.000564581	0.00236718	0.000305513	0.000629296	0.00180256	0.000665196	0.00091563	0.00302921	0.00205307	0.000115157		0.000725453	0.00143468	0.00290504	0.00113962	0.000669327	0.00162404	0.000669333	0.000862187	0.000339935	0.00108044	0.000494602	0.00308739	0.00110979
Peptide307	Y[+80]ANVIAYDHSR	P10586	PTPRF	pY1381		0.000399152		0.000172963	0.000657343	0.000315068	0.000220348	0.000165225	0.000231618	0.000227707	0.000338042	0.000266759	0.00014421			0.000319789	0.000460489	0.000587985				0.000249387	0.000180442	0.000252961	0.000307992	0.000271067	0.000298876	0.000360448	0.000228866	0.000812845
Peptide80	FIHQQPQSSSPVY[+80]GSSAK	P49023	PXN	pY88	0.138376	0.0346716	0.0653531	0.21998	0.0489223	0.118886	0.075969	0.0900867	0.46746	0.00472484	0.0365518	0.0440205	0.0364507	0.0464615	0.0735678	0.047134	0.0794758	0.0677951	0.0432685	0.0665592	0.0549867	0.0612203	0.0932295	0.154808	0.0552113	0.0310131	0.0589977	0.0442767	0.069228	0.354657	0.0243755
Peptide278	VGEEEHVY[+80]SFPNK	P49023	PXN	pY118	0.014552	0.00858475	0.0121062	0.0132949	0.00695413	0.00683122	0.0127344	0.00789169	0.0559796	0.00085623	0.00610024	0.00538672	0.0046283	0.00759962	0.0147861	0.00596393	0.00955994	0.00530761	0.00741262	0.00872599	0.00899906	0.0102697	0.00830182	0.0184009	0.00944093	0.00618527	0.00827005	0.00925776	0.0141829	0.0208591	0.0051845
Peptide60	EKPAQDPLY[+80]DVPNASGGQAGGPQRPGR	Q13671	RIN1	pY36	0.0314032	0.0177515	0.0162882	0.0127509	0.051766	0.00805523	0.0388597	0.0166963	0.0550158	0.000202438	0.0042387	0.0105292	0.0116176	0.00225795	0.0144547	0.007198	0.00310797	0.00516863	0.0473941	0.0123364	0.0212405	0.0216483	0.00752051	0.0149741	0.0231496	0.0101972	0.00526055	0.00207697	0.014014	0.0573022	0.00505508
Peptide111	GY[+80]AYVEFENPDEAEK	Q15287	RNPS1	pY205	0.000979178	0.000254795	0.000126194	0.000124813	0.000233414	0.000157411	0.000173728	0.000167351	0.000189304	0.000157771	0.000233481	0.000241925	0.00026853	0.000129911		0.000165742	0.00589344	0.000424924	0.000217562	0.000231261	0.000206371	0.000203068	0.000291966	0.000304902	0.000238984	0.000250331	0.000334054	0.000233243	0.0001191	0.000777157	0.00024127
Peptide129	IEGVY[+80]AR	P18077	RPL35A	pY34	0.00468262	0.00999809	0.00509384	0.00226924	0.00981235	0.00565767	0.0150604	0.0065462	0.00468944	0.00364852	0.00267931	0.00334509	0.00328207	0.00246721	0.00388147	0.00694415	0.00368731	0.00252882	0.00505108	0.00803868	0.0146324	0.00264108	0.00403376	0.00341423	0.00854676	0.00809673	0.0048421	0.00570823	0.00325667	0.011716	0.00402422
Peptide135	IIQLLDDY[+80]PK	P05388	RPLP0	pY24	0.00094126	0.00155125	0.000271627	0.000446488	0.0022845	0.000637408	0.00207431	0.000492069	0.000457182	0.00121789	0.000682806	0.000570866	0.000392051	0.000254315	0.000565884	0.00029548	0.000234921	0.0004214	0.000339487	0.000282863	0.000752915	0.000313027	0.000711405	0.000352101	0.00118837	0.000989731	0.00109368	0.000236483	0.000485111	0.000672433	0.00082949
Peptide127	IAIY[+80]ELLFK	P46783	RPS10	pY12					0.00126466	0.000338218	0.00119648	0.000667148		0.000512281	0.000307539	0.00153909	0.000169104	0.000223165		0.00122964	0.000178737	0.00181729	0.000202876	0.000328642	0.000556776	0.000256252	0.00041771		0.000492211	0.000796248	0.000359713	0.000378723	0.000209323	0.00106681	0.000560429
Peptide14	APTNEFY[+80]A	P31431	SDC4	pY197	0.000323903	0.000370034	0.000370549	0.00034242	0.000334671	0.000299214	0.000322152	0.000327793	0.000378745	0.000336492	0.000311628	0.000347422	0.000322374	0.000299465	0.000290671	0.000345695	0.000290049	0.000217456	0.000312062	0.000327249	0.000331972	0.000295491	0.00030328	0.000295119	0.000312439	0.000364085	0.000327327	0.000303204	0.000297508	0.000381138	0.000297401
Peptide306	Y[+80]AAPELEIAR	Q86VE9	SERINC5	pY345	0.00552317	0.0360933	0.0104028	0.00513119	0.00918571	0.00730212	0.00280327	0.00364104	0.0195034	0.00267257	0.00258123	0.00137073	0.0149553	0.00778342	0.00290484	0.00138351		0.00316691		0.00111489	0.00831987	0.00587503	0.00493672	0.00221549	0.00459881	0.0236829	0.00188183	0.00395728	0.00343393	0.0236421	0.0259024
Peptide157	LPQDDDRPADEY[+80]DQPWEWNR	Q15464	SHB	pY336		0.00162367		0.000974054	0.00268986	0.000428347	0.00322443	0.000887392		8.05251e-05	0.00013147	0.000417715	0.000482943	0.000239244	0.000651647	0.000351367		0.00212721	0.000429248	0.000602702	0.00144572	0.000550949	0.000328275	0.000605963	0.00098474	0.00132441	0.000127174	0.000151769	0.000273096	0.000949633	0.000439069
Peptide289	VTIADDY[+80]SDPFDAK	Q15464	SHB	pY246	0.000790162	0.000316308	0.000194444	0.000194832	0.000313201	0.000166054	0.00065696	0.000246312	0.000975155	0.000151835	0.000163591	0.000282853	0.000334228	0.000173331	0.000290291	0.000130439	0.000181919	0.000231786	0.000154015	0.000233937	0.000547955	0.000270073	0.000166726	0.000177596	0.000218442	0.000303602	0.000136736	0.000145885	0.000153786	0.000370971	0.000195375
Peptide34	DQEAPSTTEY[+80]SEIK	O15389	SIGLEC5	pY544	0.00269169	0.00964294	0.008234	0.0406008	0.029647	0.180192	0.0383746	0.015357	0.0395965	0.0278938	0.0585746	0.10841	0.0973225	0.00487581	0.0199456	0.00793247	0.234231	0.0146037	0.141181	0.0906625	0.00828247	0.0591576	0.0060451	0.0233	0.134278	0.00960716	0.00280966	0.0215245	0.00537921	0.162617	0.0812013
Peptide102	GQEATDTEY[+80]SEIK	Q9Y336	SIGLEC9	pY456	0.000349848	0.000328008	0.000560939	0.00107147	0.000396649	0.000859634	0.000502086	0.000165329	0.000752438	0.000235569	0.000748911	0.000866829	0.000794907	0.000324846	0.000394151	0.000270267	0.00102278	0.0006612	0.000519831	0.00112186	0.000450523	0.000753069	0.000439344	0.000378581	0.0009611	0.000344449	0.000282365	0.000522282	0.000391823	0.00108709	0.000658617
Peptide185	NQALNTDNY[+80]GHDLASVQALQR	Q13813	SPTAN1	pY1261	0.00187334	0.00114018	0.000475026		0.000779194	0.000383825	0.00101922	0.000125289	0.00108973		0.0004161	0.000555011				0.00101304	0.00122426			0.000753442	0.000859859	0.000544699	0.000873092	0.00348803	0.000719698	0.00416184	0.000732747		0.000422508	0.00161898	0.000670425
Peptide201	QNLLSQSHAY[+80]QQFLR	Q01082	SPTBN1	pY1171							0.00404045	0.0159327	0.00738626	0.00149393	0.00231929	0.00166273	0.00750282	0.00211724			0.00464083		0.0024385	0.00102484	0.00432804	0.00761214	0.00358907		0.0071054		0.00251897		0.000518374		0.0246028
Peptide161	LVNEAPVYSVY[+80]SK	O75886	STAM2	pY374	0.00021813	0.000302545	0.000276531	0.000149061	0.00762657	0.000209684	0.000248712	0.000318585	0.000658229	0.00015975	0.000172722	0.000307812	0.000296059	0.000226622	0.000235087	0.000182705	0.000219533	0.000218842	0.000386207	0.00023798	0.00023592	0.000230009	0.000440607	0.000432983	0.000107843	0.00023495	0.000158097	0.000184978	0.000259795	0.000257894	0.000171496
Peptide329	YC[+57]RPESQEHPEADPGSAAPY[+80]LK	P40763	STAT3	pY705	0.0455058	0.0303855	0.0419754	0.0398338	0.0916363	0.0368781	0.0750572	0.107972	0.10688	0.0328676	0.0249004	0.0416436	0.0368654	0.0863629	0.0872447	0.0443334	0.0774922	0.0486371	0.0774052	0.0784514	0.0499769	0.0719897	0.0487245	0.0658033	0.0292929	0.021451	0.0368484	0.0191161	0.0466076	0.0581891	0.024526
Peptide196	QESTVSFNPY[+80]EPELAPWAADKGPQR	P43405	SYK	pY323	0.00235747	0.000461837	0.00181921		0.00349838	0.000205014	0.00190505	0.00143164	0.00154557	0.000179034	0.000210762	0.00162415		0.000151647		0.000409402	0.000124479		0.000220118	0.000172605	0.000547097	0.00078966	0.00193121		0.00063039	0.00177776	0.000286125	0.000645627	0.00136351		0.000961022
Peptide326	Y[+80]VLDDQY[+80]TSSSGAK	P42680	TEC	pY513;pY519								0.00245018		0.108532	0.005112		0.00110774		0.00250957	0.052757	0.00476254	0.0081323	0.0123345			0.00479145		0.000747648		0.00117591	0.012318	0.0172134	0.00395596		0.00449755
Peptide77	FEEPAPLSY[+80]DSRPR	Q07157	TJP1	pY1140	0.000231143	0.000141315	0.000122359	0.000112244	0.000127439	8.13274e-05	0.000114103	9.80664e-05	0.000184464	0.000109155	0.000149631	0.00012504	8.46239e-05	0.000134694	0.000140521	0.000102058	0.00012852	8.86603e-05	0.000153364	8.33043e-05	0.00016864	0.000161895	0.000120525	0.000128372	0.000159757	0.000121237	0.000131862	8.84675e-05	0.000166404	0.000165533	8.50783e-05
Peptide207	QYFEQY[+80]SR	Q07157	TJP1	pY1195	0.00148905	0.00164852					0.000871275	0.000546434	0.00432564		5.00572e-05				0.00133077		0.000213859	0.000466945				0.000537419	0.000918411	0.000839184	0.00182045	0.00135968	0.000546451	0.000752779	0.00046342	0.000839512
Peptide232	SNHY[+80]DPEEDEEYYR	Q07157	TJP1	pY1346	0.00240068	0.0576926	0.119024	0.00367413	0.0132347	0.00180292	0.0064437	0.0772011	0.00265417	0.0126342	0.0023188	0.00170126	0.00252618	0.00546154	0.0234317	0.00642161	0.00310498	0.0385086	0.00269017	0.00297227	0.0265071	0.00859968	0.00230089	0.0935151	0.0380021	0.00724363	0.0777535	0.0204459	0.0882833	0.0114862	0.0968643
Peptide233	SNHY[+80]DPEEDEEYYRK	Q07157	TJP1	pY1346	0.000219052	0.000229329	0.000148432	9.92005e-05	0.000141313	0.000113068	0.000180271	0.00010154	0.000465061	0.000120971	0.000107599	0.000117937	0.00011488	0.00011577	0.000126834	0.000117056	0.000137912	0.000103449	0.000109617	0.000103589	0.000172858	0.000125542	0.000133251	0.000102046	0.000212692	0.000198383	0.000131518	0.000102871	0.000124675	0.000133195	0.000114793
Peptide121	HPDIY[+80]AVPIK	Q9UDY2	TJP2	pY1118	0.0820943	0.0468885	0.0280166	0.0187595	0.042043	0.00849015	0.0516175	0.0501103	0.0686013	0.00441548	0.0141701	0.145131	0.0417203	0.0250598	0.0251006	0.0220469	0.010964	0.0335524	0.0681395	0.0246989	0.113379	0.0161614	0.035324	0.0313504	0.0252742	0.0280823	0.0373655	0.015618	0.0246157	0.0333296	0.0478793
Peptide8	ALDY[+80]YMLR	Q9Y490	TLN1	pY70	0.00630344	0.0127858	0.00665999	0.00734748	0.00649053	0.00586063	0.0132406	0.00629095	0.00997107	0.00538792	0.00692113	0.009521	0.00624459	0.00454791	0.00939828	0.00827454	0.00641036	0.00761213	0.009045	0.0123333	0.0128343	0.00952482	0.0130439	0.0106459	0.0101524	0.00904716	0.0063735	0.00464316	0.00822011	0.0124079	0.00730439
Peptide49	EAAY[+80]HPEVAPDVR	Q9Y490	TLN1	pY2224	0.000260145	0.000326595	0.000257514	0.000262523	0.000268671	0.000192331	0.000344717	0.000237284	0.00038239	0.000209401	0.000367961	0.000292742	0.000190844	0.000235747	0.000280977	0.000342875	0.000471366	0.000263769	0.000269638	0.000307436	0.000307535	0.000332959	0.000400606	0.000425672	0.000263101	0.000250134	0.000318701	0.000264365	0.000285111	0.000365687	0.000277029
Peptide234	SNTSPEELGPLANQLTSDY[+80]GR	Q9Y490	TLN1	pY1893	0.00140459	0.00180893	0.00206031	0.00173328		0.00284895	0.00203495	0.00227013	0.00388083	0.000432778	0.0017385	0.00229401	0.00266599			0.00212295	0.000843407	0.00377544	0.00211075	0.0033275	0.00360362	0.00309432	0.00295033		0.000756656			0.00169065	0.00184649
Peptide257	TMQFEPSTMVY[+80]DAC[+57]R	Q9Y490	TLN1	pY26	0.00940958	0.00744466	0.0127896	0.010142	0.0145139	0.00224189	0.0165858	0.00727553	0.0117691	0.00400173	0.00464736	0.0111753	0.00443779	0.011145	0.0104079	0.0144215	0.000508804	0.0282718	0.00266983	0.00546754	0.0203717	0.0116122	0.0125659	0.0129726	0.00681164	0.00795685	0.00684007	0.00739678	0.0129675	0.0121144	0.00740736
Peptide51	EC[+57]DY[+80]SIDGINR	Q9Y4G6	TLN2	pY1665	0.00387022	0.00340744	0.00326957	0.00271306	0.00331438	0.00187423	0.00474267	0.00252692	0.00499953	0.00115811	0.0029074	0.00249798	0.00321899	0.00338639	0.00470487	0.00328422	0.00291481	0.00338354	0.00374778	0.00378826	0.00404582	0.00327292	0.00318339	0.00443643	0.0027582	0.00249959	0.00344547	0.00303737	0.00317849	0.00352544	0.00301567
Peptide12	ALPQNDDHY[+80]VMQEHR	Q07912	TNK2	pY284	0.00430111	0.0021126	0.00199483	0.00124009	0.000844646	0.00108015	0.00224976	0.0016971	0.00341226	0.000195368	0.0017548	0.00126024	0.00107197	0.00241718	0.00128387	0.0027458	0.00215228	0.00136035	0.00264403	0.00305288	0.00283725	0.00213492	0.00212954	0.00226103	0.00212477	0.00134055	0.00128484	0.000785534	0.00241271	0.00558603	0.00134717
Peptide145	KPTY[+80]DPVSEDQDPLSSDFKR	Q07912	TNK2	pY518	0.00446479	0.00211847	0.00434541	0.00103061	0.0010786	0.000637847	0.00253965	0.00192658	0.00624756	0.000329727	0.000993337	0.00113751	0.000589991	0.00107307	0.0014962	0.00291259	0.000235373	0.00185734	0.00123537	0.00137803	0.00345124	0.00230877	0.00285849	0.00346435	0.00266541	0.00155739	0.00168448	0.000988445	0.00214907	0.00423958	0.00174241
Peptide308	Y[+80]ATPQVIQAPGPR	Q07912	TNK2	pY827	0.00481201	0.00186861	0.00190654	0.00108795	0.000721884		0.00202089	0.00149365	0.00288944		0.000983377			0.00973598	0.00223535	0.00229211		0.00179078			0.00208641	0.0013759	0.0021029	0.00159171	0.00102024	0.00127525	0.00146051	0.00176163	0.00254761	0.00286942	0.00221433
Peptide6	AGSLPNY[+80]ATINGK	Q9HBL0	TNS1	pY1404	0.000973781	0.000645997	0.00111384	0.00237653	0.000384273	0.000392862	0.00097753	0.000313817	0.00584863	0.000104811	0.000831826	0.000179609	0.000370087	0.000398684	0.00298059	0.00148766	0.000445635	0.00124219	0.000505264	0.00106094	0.00196328	0.0036826	0.00108262	0.00248379	0.000629566	0.000450417	0.000573204	0.00179721	0.00177705	0.00150152	0.000632103
Peptide24	DDGMEEVVGHTQGPLDGSLY[+80]AK	Q9HBL0	TNS1	pY366	0.0481093	0.00577369	0.0104571		0.00219205	0.000612991	0.0065243		0.00228191		0.00221186	0.00433126				0.00769636			0.00231719	0.00386836	0.0168885	0.0124178	0.0139988		0.00363568		0.00534113	0.00521144	0.00801504		0.00593984
Peptide120	HPAGVY[+80]QVSGLHNK	Q9HBL0	TNS1	pY1254	0.000618268	0.00046264	0.000453791	0.000514231	0.000282885	0.000184072	0.000568453	0.00027816	0.000792594	0.000209817	0.000339167	0.000227793	0.000195899	0.00028072	0.000350774	0.00107407	0.000195528	0.000608429	0.000206202	0.000210579	0.000916052	0.000883134	0.000630539	0.000995029	0.000239032	0.000371309	0.00034163	0.000731237	0.00127852	0.000283026	0.000281051
Peptide218	SDVY[+80]SDLNTQRPYYK	O43914	TYROBP	pY102	0.000397769	0.000226583	0.000973131	0.00066788	0.000509068	0.00123088	0.000799124	0.000432241	0.001407	0.000424191	0.000656313	0.00156538	0.00130118	0.000428536	0.00102675	0.000475826	0.00186163	0.000702477	0.0010718	0.000886574	0.00038429	0.00117102	0.00107888	0.000700038	0.000654378	0.000362263	0.00040347	0.000483085	0.000560941	0.00144898	0.00108747
Peptide287	VQIY[+80]HNPTANSFR	P50552	VASP	pY39	0.00360526	0.00375566	0.00182557	0.00142137	0.00465716	0.00175167	0.00344561	0.00266627	0.00315558	0.000943044	0.00231707	0.00196403	0.00104109	0.000889051	0.00148902	0.00392373	0.000531682	0.00156851	0.00235282	0.00222389	0.00281024	0.00213882	0.00184159	0.00204431	0.00324145	0.00216772	0.00243784	0.00165268	0.00179817	0.00313118	0.0020202
Peptide44	DY[+80]LIDGSR	P18206	VCL	pY107	0.000587702	0.000622362	0.000668996	0.00068096	0.000480518	0.000451288	0.000583082	0.000366019	0.000758994	0.000362975	0.000748915	0.000604016	0.000618208	0.00068635	0.000691851	0.00416837	0.00128182	0.000978925	0.000818287	0.000934513	0.00221703	0.000996506	0.000651417	0.000729229	0.000463854	0.000581173	0.000626829	0.000850521	0.000921213	0.000719774	0.000454791
Peptide183	NPGNQAAY[+80]EHFETMK	P18206	VCL	pY692	0.0025333	0.001777	0.00153976	0.00327634	0.00230683	0.00218289	0.00199603	0.0024516	0.00297005	0.00110846	0.00202166	0.0030123	0.00281609	0.00208948	0.00405714	0.00218804	0.00740289	0.00183285	0.0045206	0.00576124	0.00213743	0.00370266	0.00210503	0.00274602	0.00168673	0.00112094	0.00101618	0.00143811	0.00142186	0.0027664	0.00178875
Peptide221	SFLDSGY[+80]R	P18206	VCL	pY822	0.106722	0.143756	0.0632218	0.101393	0.0580128	0.0587044	0.119954	0.0751225	0.0985091	0.0526807	0.115616	0.0857726	0.0562309	0.119227	0.138623	0.11639	0.700466	0.0839912	0.0834985	0.130681	0.0897109	0.106898	0.129656	0.173855	0.126279	0.110027	0.143996	0.0777654	0.0726447	0.162147	0.102247
Peptide72	FANY[+80]IDK	P08670	VIM	pY117	0.000801225	0.00226976	0.00120803	0.00178123	0.0010439	0.00135076	0.00185587	0.000984677	0.00151409	0.00118562	0.00134692	0.00178747	0.00137102	0.00190534	0.00217504	0.00103018	0.00154872	0.000965703	0.00255443	0.00303048	0.00159553	0.0015362	0.00243293	0.00192999	0.00202182	0.00147086	0.00168444	0.00117863	0.0012786	0.0016207	0.00152107
Peptide230	SLYASSPGGVY[+80]ATR	P08670	VIM	pY61	0.0088487	0.00748436	0.0208028	0.0105381	0.0101649	0.00927554	0.0161087	0.012468	0.0237468	0.00287526	0.00562015	0.0332045	0.0108821	0.00384251	0.0263963	0.00599193	0.00302583	0.0145239	0.0331963	0.0243785	0.0101878	0.0176224	0.0380064	0.0472626	0.00908801	0.00474167	0.00795733	0.00997537	0.0150725	0.0182894	0.0123439
Peptide284	VIY[+80]DFIEK	O00401	WASL	pY256	0.00282043	0.0021072	0.00262518	0.00215282	0.00108989	0.000667713	0.00230048	0.00203258	0.00788552	0.00035551	0.00146322	0.00167916	0.00103712	0.00183626	0.00169764	0.00282982	0.00140316	0.00141349	0.00183728	0.00215622	0.00289266	0.00200831	0.00314528	0.00294856	0.00329267	0.000984672	0.000812757	0.00128576	0.00220945	0.00252618	0.000599779
Peptide83	GAY[+80]SLSIR	P07947	YES1	pY194	0.002314	0.00252084	0.00277853	0.00199436	0.00206674	0.0025703	0.00293352	0.00228222	0.00356126	0.00116573	0.00251107	0.00262778	0.00251232	0.00174408	0.00266421	0.00390131	0.00227015	0.00173318	0.00350581	0.0040721	0.00257645	0.00315482	0.00205872	0.00275573	0.00296437	0.00165371	0.00167108	0.00175037	0.00233212	0.00271958	0.00212354
Peptide147	LDNGGY[+80]YITTR	P07947	YES1	pY222	0.000908068	0.000671724	0.00102392	0.000369266	0.000568207	0.000482937	0.000837127	0.000755269	0.00142346	0.000184037	0.000957141	0.000516818	0.000394037	0.000458356	0.000990812	0.00166816	7.98245e-05	0.00049962	0.000867212	0.000940268	0.00103951	0.00108086	0.000865115	0.000971474	0.000538697	0.000636862	0.000506759	0.000539877	0.000924594	0.000721482	0.00050391
Peptide303	WTAPEAALY[+80]GR	P07947	YES1	pY446	0.000682982	0.000835777	0.00172912	0.000764679	0.00100602	0.000796109	0.00121416	0.00107419	0.00293161	0.000820387	0.000818238	0.000696505	0.000982987	0.00101468	0.00590637	0.000304451	0.000219802	0.000358594	0.000508232	0.000729412	0.000939955	0.00110739	0.000647513	0.00063173	0.000174073	0.000566368	0.00031379	0.000365149	0.000640109	0.000953305	0.00118434
Peptide312	Y[+80]LAEVAAGDDK	P63104	YWHAZ	pY128	0.00037763	0.000298064	0.000264671	0.000339825	0.000304173		0.000394522	0.000141942	0.000370568	0.0003393	0.000342473	0.000246829			0.000252775	0.00148065		0.000380499				0.000360048	0.000243219	0.000826709	0.000201455	0.000673034	0.000304596	0.000244364	0.000610629		0.000882473
Peptide128	IDTLNSDGY[+80]TPEPAR	P43403	ZAP70	pY292		0.000263218	0.000338242				6.88989e-05	0.000239818		6.56881e-05				4.68034e-05	0.000124248			0.000142137			0.000206652		6.52337e-05	0.000167202	0.000103057		0.000183253	9.2047e-05	0.000162832		0.000253887

## Sheet: Table 6.3
Table 6.3	Z-score normalized L:H ratios of peptides identified in at least half of all tumors (expanded matrix).
Z-scored L/H ratio for all peptides in expanded matrix.
Blanks indicate an unquantifiable peptide
					L/H ratios
Peptide#	Modified Sequence	UniProt ID	Gene ID	Tyr Phosphosite	Tumor 1	Tumor 2	Tumor 3	Tumor 4	Tumor 5	Tumor 6	Tumor 7	Tumor 8	Tumor 9	Tumor 10	Tumor 11	Tumor 12	Tumor 13	Tumor 14	Tumor 15	Tumor 16	Tumor 17	Tumor 18	Tumor 19	Tumor 20	Tumor 21	Tumor 22	Tumor 23	Tumor 24	Tumor 25	Tumor 26	Tumor 27	Tumor 28	Tumor 29	Tumor 30	Tumor 31		Modifications key
Peptide62	ELPPDQAEY[+80]C[+57]IAR	P12814	ACTN1	pY859	-0.265757	-0.252519		0.117536	-0.363264		-0.256236	0.134943	-0.154915	-0.289113	-0.307713	-0.267421		-0.310343	0.160007	-0.178449	4.87753	-0.339701	-0.184032	0.639857	-0.424806	-0.149631	-0.235071	-0.109744	-0.219383	-0.384541	-0.288765	-0.347944	-0.365522	-0.235001			Y[+80] = Tyrosine phosphorylation
Peptide69	EVPIY[+80]ANR	Q13443	ADAM9	pY769	0.187372	-0.0615936	4.66261	-0.250189	0.39774	-0.673857	0.4552	-0.293833	0.865548	-0.866617	-0.454244	-0.359612	-0.469526	0.781498	0.237811	0.308443	-0.655154	-0.430327	0.0483085	-0.673457	-0.0889665	-0.385203	-0.0869442	-0.092353	-0.521286	-0.0115296	-0.855219	-0.630122	-0.733488	1.04645	-0.397452		T[+80] = Threonine phosphorylation
Peptide76	FAVPTY[+80]AAK	Q13443	ADAM9	pY778	-0.287354	-0.1539	5.06109	-0.0422302	0.396398	-0.201413	-0.0708446	-0.105739	-0.0295877	-0.474297	-0.369459	-0.415421	-0.026725	0.466133	-0.356362	-0.12781	-0.223499	-0.245278	-0.393485	-0.399284	-0.158387	-0.307011	-0.227405	-0.433835	-0.311237	-0.128834	-0.513181	-0.449284	-0.525349	1.22461	-0.171014		S[+80] = Serine phosphorylation
Peptide61	ELGEY[+80]GFHEYTEVK	P00352	ALDH1A1	pY481					0.617987	-0.895665	-0.59563	0.592361		-0.787157	-0.970366	-0.966732	-0.565213	-1.04625			0.934134		-0.906522	-0.87066	0.636191	-0.159565	1.49601		-0.139312	2.35946	-0.667582		0.67032		1.26418		C[+57] = Carboxyamidomethylcysteine
Peptide170	LYSNAY[+80]LNDLAGC[+57]IK	P00352	ALDH1A1	pY119						-0.587852	-0.220983	-0.38102	-0.143333		-0.574931	-0.434881		-0.312227		0.785887	-0.4192		-0.307035	0.216395	-0.229828	-0.267925	3.53957		-0.243168				-0.419472
Peptide192	QAWFIENEEQEY[+80]VQTVK	P04083	ANXA1	pY21						-0.0865853	-0.423138			-0.937955	-0.970929	0.174271	0.0579454	-0.853391		-0.549968	2.86362		-0.247612	0.264115	0.863095	-0.319324	1.70556		-0.694109				-0.422917		-0.42268
Peptide228	SLY[+80]HDISGDTSGDYR	P50995	ANXA11	pY482	-0.27018	-0.234045	-0.297597	-0.340144	-0.35356	-0.153641	-0.108033	-0.283817	-0.110532	-0.402898	-0.371074	-0.0545598	1.35243	-0.13149	-0.308464	0.217142	5.0951	-0.232167	0.144799	-0.0211907	-0.0092071	-0.130071	-0.397356	-0.383926	-0.145236	-0.408599	-0.392151	-0.33002	-0.404651	-0.203715	-0.33114
Peptide2	AEDGSVIDY[+80]ELIDQDAR	P07355	ANXA2	pY188	3.37268	-1.05547	0.191112	-0.30299	0.205623	-1.13675	1.12117	0.469257	1.46956	-1.12202	-0.787464	-0.376477	-1.03057	-0.891576	0.973207	-0.270536	0.939015	-0.597817	-0.567322	-0.566793	-0.115592	0.183307	0.0414906	1.96121	-0.687681	-0.179872	-0.486481	-0.879601	0.0280739	0.377318	-0.278008
Peptide20	AY[+80]TNFDAER	A6NMY6	ANXA2P2	pY30	-0.509767	0.51642	2.2237	-0.64686	-0.50183	-0.77125	-0.452514	1.56653	-0.621601	-0.563043	-0.732612	-0.711987	-0.736325	-0.650492	-0.195155	-0.661228	-0.722765	0.320952	-0.609637	-0.742312	-0.161671	-0.555363	-0.718751	2.00481	0.381944	-0.567901	1.26449	-0.198715	2.14589	-0.420323	2.02736
Peptide160	LSLEGDHSTPPSAY[+80]GSVK	A6NMY6	ANXA2P2	pY24	0.856628	0.0543469	1.3463	-0.752164	-0.895024	-0.750091	0.704897	0.126149	2.05828	-0.820905	-0.760423	-0.486283	-0.6401	-0.664951	3.71613	-0.62533	-0.517977	-0.574168	-0.229754	-0.7286	-0.244455	0.614262	0.717879	0.906277	-0.0310363	-0.562074	-0.637626	-0.621866	-0.300471	0.0155114	-0.273357
Peptide246	SYSPY[+80]DMLESIR	A6NMY6	ANXA2P2	pY238	0.259821	-0.110565	-0.104797	-0.213498	-0.0922435	-0.35953	-0.0683353	-0.0484569	-0.109001	-0.428621	-0.324576	-0.229678	-0.314668	-0.243955	0.283952	-0.327469	5.31641	-0.204365	-0.150297	-0.266523	-0.157984	-0.188614	-0.164465	0.0715865	-0.22978	-0.226654	-0.306248	-0.372774	-0.249393	-0.0952301	-0.344043
Peptide166	LYDAY[+80]ELK	P08758	ANXA5	pY94	-0.72621	-0.545094	-0.434236	-0.378394	-0.843178	-0.566484	-0.150523	-0.481823	0.50731	-0.468755	0.035094	-0.482589	-0.128986	0.648169	-0.314997	4.39396	0.187278	-0.0144028	-0.00722185	-0.0856786	2.19165	0.240971	0.000379119	0.0341781	-0.669105	-0.745034	-0.100809	-0.0290811	0.322168	-0.60439	-0.784166
Peptide229	SLY[+80]SMIK	P08133	ANXA6	pY302	-0.854367	-0.81484	0.217372	-0.537173	-0.931586	-0.350533	-0.417442	-0.47502	-0.27448	-1.11303	-0.8605	-0.196452	0.887482	-0.0206666	-0.198581	2.74041	2.66864	0.100603	-0.385788	0.898286	0.731188	1.1898	-0.0335301	0.0708102	-0.618075	-1.14048	-0.528608	-0.515129	1.8833	-0.591628	-0.52998
Peptide253	TEELIY[+80]LSQK	Q12774	ARHGEF5	pY1370	-0.240193	-0.148947	-0.314038	-0.303212	-0.233177	-0.265921	-0.12542	-0.158243	0.443168	-0.264801	-0.304325	-0.0228407	5.32595	-0.114534	-0.271727	0.130891	-0.129248	-0.315647	-0.210261	-0.224664	-0.0682776	-0.275339	-0.28889	-0.191382	-0.217335	-0.165988	-0.124005	-0.273292	-0.290937	-0.24673	-0.110639
Peptide78	FELSC[+57]Y[+80]SLAPQIK	P00966	ASS1	pY133		-0.199289			-0.155699	-0.222909	-0.213821	-0.217088	-0.229802	-0.22951	-0.228601	-0.214336	-0.217822	-0.227422		-0.217105	4.47649	-0.183211	-0.217897	-0.223702	-0.220397	-0.234376			-0.189259	-0.212414		-0.216294	-0.205536
Peptide91	GIVVY[+80]TGDR	P05023	ATP1A1	pY260	1.54492	-0.640714	-0.825115	-0.066286	0.0467243	-0.55083	-0.248333	-0.997305	0.719314	-0.560234	2.7509	-1.3365	-1.00995	0.791545	-0.909598	0.838194	0.47453		0.112848		-0.830016	-0.25667	-1.01079	0.558106	-0.26264	0.0708659	2.49927	0.357171	-0.979954	-0.037205	-0.242253
Peptide142	IYNGDY[+80]YR	P30530	AXL	pY702	-0.105762	-0.120692	0.387078	0.0932168	-0.318192	-0.06443	0.144375	-0.835505	2.67667	-1.22103	0.299331	-1.22345	-0.883887	-1.07997	0.969926	0.418133	-0.790188	-1.14226	-0.637838	-0.0211108	0.0358684	2.229	0.143964	2.1866	0.3632	0.178676	-0.901495	-0.944905	0.344168	0.797468	-0.97695
Peptide16	AQQGLY[+80]QVPGPSPQFQSPPAK	P56945	BCAR1	pY128	1.35162	-0.144546	1.02775	-0.139218	-0.710909	-1.14511	0.346382	0.025679	3.07333	-1.546	-0.92298	0.0548478	-0.810247	-0.729726	1.15146	-0.537086	-0.740143	-0.715904	-0.103893	-0.223139	-0.114757	-0.310331	0.121053	2.4128	-0.620596	-0.73696	-0.612489	0.116967	0.644646	0.861131	-0.323636
Peptide119	HLLAPGPQDIY[+80]DVPPVR	P56945	BCAR1	pY249	0.0345607	-0.239123	-0.0791213	-0.339308	-0.297399	-0.362141	-0.163722	-0.258932	0.268284	-0.415311	-0.315056	-0.234695	-0.373114	-0.373722	5.21551	-0.250617	-0.390207	-0.188272	-0.295283	-0.252221	-0.198472	-0.267088	-0.0932336	0.906224	-0.268471	-0.271481	-0.21801	-0.15526	-0.0640091	0.146319	-0.206625
Peptide212	RPGPGTLY[+80]DVPR	P56945	BCAR1	pY387	0.49556	-0.272152		2.64193	-0.758764	-0.233405	-0.159653	-0.30348	-0.453488		-0.620831	-0.81774		-0.376556		-0.668878		1.00604		-0.626672	-0.657607	3.35149	-0.321464	-0.131596	-0.315821	-0.109674	-0.359089	-0.621869	-0.109125	0.515275	-0.0924255
Peptide280	VGQGYVYEAAQPEQDEY[+80]DIPR	P56945	BCAR1	pY234						0.268898	-0.344661			-0.815269	-0.434039	-0.318788	-0.803401	0.297967		-0.788003	-0.574689		-0.749676	-0.805837	-0.50368	0.833191				-0.771516	2.13968	0.71027	2.51192		0.147634
Peptide210	RIEY[+80]IEAR	Q8WUW1	BRK1	pY63	0.809915	-0.0717959	-0.163147	-0.413805	1.17678	-0.694272	0.403406	0.885914	0.643004	-1.21561	-0.816263	0.00504764	-0.92871	0.129705	-1.34506	0.399123	3.50284	-0.40329	0.524816	1.56256	-0.0959234	-0.786284	-0.410647	-0.552701	-0.373687	-1.15218	-0.958117	-1.04497	0.330104	1.04116	0.0121042
Peptide339	YVLDDEY[+80]TSSVGSK	Q06187	BTK	pY551	-0.734062	-0.599429	3.4618	-0.73268	-0.427168	-0.221971	-0.0813767	-0.636971	0.339023	-0.575239	-0.410773	2.50166	0.29246	-0.460618	-0.502835	-0.280678	2.56658	-0.175357	-0.0185762	0.0556327	-0.0413683	-0.134971	-0.0846363	-0.250584	-0.67094	-0.717228	-0.625982	-0.258382	-0.475077	-0.236293	0.136035
Peptide338	YVDSEGHLY[+80]TVPIR	Q03135	CAV1	pY14	0.0382671	-0.493522	0.249623	-0.408888	-0.445822	-0.404569	-0.353774	-0.518566	0.729926	-0.587503	0.0271961	-0.559111	-0.570209	-0.465171	0.174892	4.77266	-0.469694	-0.265599	-0.36066	-0.413914	0.739503	1.00201	-0.12684	0.897827	-0.504167	-0.494903	-0.473051	0.311787	-0.122779	-0.360381	-0.544574
Peptide40	DTY[+80]DALHMQALPPR	P20963	CD247	pY153	-0.0733908			-0.411962		-0.287955	-0.206182	-0.0111549	0.00620966		0.034446	-0.39093				-0.399793	-0.340261	-0.398424				-0.19908		-0.387763	-0.259023	-0.197208	3.83621		-0.313744
Peptide55	EEY[+80]DVLDK	P20963	CD247	pY83	0.45915	-0.512357	0.458871	-0.826632	-0.527306	-0.921437	-0.893697	-0.494289	-1.09828	0.97223	1.40653	-0.638954	-1.05521	0.569632	0.963201	-1.57771	1.57903	0.25004	-0.939117	-1.35368	-2.36908	1.15117	0.990147	0.307638	0.750434	1.06144	0.161452	0.616638	1.15687	0.557349	-0.20408
Peptide89	GHDGLY[+80]QGLSTATK	P20963	CD247	pY142	1.22613	-0.585067	1.52064	-0.800321	0.383208	-0.298118	1.03247	2.37385	1.15729	-1.38912	-0.14292	-0.687776	-0.47768	-0.574895	-0.148093	-0.558429	0.144417	-1.01553	-0.0323088	0.550088	0.416577	0.235468	0.215221	-0.735537	-1.05784	-0.889141	-0.230701	-0.433563	2.7133	-0.734884	-1.17674
Peptide144	KNPQEGLY[+80]NELQK	P20963	CD247	pY111	0.279851	-0.93339	2.10931	-0.767528	-0.228271	-0.300674	0.917323	1.71792	1.12872	-1.16735	-0.285191	-0.665582	-0.534214	-0.70753	0.426149	-0.303735	0.456662	-0.804912	-0.0203276	0.513232	0.162359	0.342919	0.330696	-0.608134	-0.888382	-0.961612	-0.311982	-0.585653	3.24615	-0.455109	-1.10172
Peptide171	MAEAY[+80]SEIGMK	P20963	CD247	pY123	0.185799	-0.760464	0.820297	-0.442182	-0.130636	-0.861507	0.958556	2.35755	0.308457	-1.18018	-0.632815	-0.228601	-0.128321	-0.680476	0.0073464	-0.22719	-0.437083	-0.512044	-0.311514	0.108793	0.70839	1.73126	0.272347	-0.26032	-0.806393	-0.629355	-0.861072	-0.222162	3.38804	-0.528239	-1.00629
Peptide184	NPQEGLY[+80]NELQK	P20963	CD247	pY111	0.0195154	-0.717233	1.49238	-0.318839	-0.0163161	-0.670207	0.724327	1.69826	0.427982	-0.94818	0.501183	-1.25942	-0.704128	-0.624579	0.968921	-0.396383	0.613189	-1.13512	-0.503594	1.52431	0.133811	0.564339	0.409283	-0.525391	-0.840012	-1.03952	-0.111984	-0.324751	3.06749	-0.858364	-1.15097
Peptide214	SADAPAYQQGQNQLY[+80]NELNLGR	P20963	CD247	pY72	1.97262	-0.629462	0.386041		0.224545		-0.35701	-0.403664	-0.256835		-0.451226	-0.541914		-0.772629	3.25564	-0.64098	-0.663274		0.310516		-0.177409	-0.357561	-0.222733					-0.536787	-0.137882
Peptide23	DDAQY[+80]SHLGGNWA	P04234	CD3D	pY160	-0.302136			-1.43817	-1.17361	-0.812039		-1.3042		0.586232	0.774809	-0.41614	-0.238708	0.537178	-0.00592555		0.740479	0.664281	-1.02256			-0.384951	1.09913	-0.57476	-0.679038	0.585638		-0.0462925	2.98897	0.42181
Peptide176	NDQVY[+80]QPLR	P04234	CD3D	pY149	-0.17448	-0.600199	0.566485	-0.414248			-0.264218	-0.175358	0.099859		-0.490678	-0.570265			-0.0790752	-0.312075	-0.393894	-0.525788		0.507339	4.15798	-0.257293	-0.0533063	-0.315926				-0.354383	-0.136576	-0.213904
Peptide203	QTLLPNDQLY[+80]QPLK	P09693	CD3G	pY160	-0.304111	-0.250293	-0.190095	-0.242748	-0.412722	0.794678	-0.247315	-0.301655	-0.215212	-0.221247	-0.247327	-0.166117	5.25106	-0.246633	0.2773	-0.242094	-0.232525	-0.122836	-0.242957	-0.277058	0.139735	-0.281794	-0.0649088	-0.1273	-0.174721	-0.265209	-0.404756	-0.156939	-0.301791	-0.278649	-0.243766
Peptide138	IY[+80]DEILQSK	Q9UIB8	CD84	pY296	-0.919821	-0.485225	-0.658492	-0.038902	-0.0414286	-0.397368	1.07081	-0.337044	2.06653		0.507522	0.516546	-0.127203				0.474643		-0.923727	0.285849	0.231732	-0.906291	2.70043	-1.12315			-1.12423	0.503828	0.891991	-1.05243	-1.11457
Peptide100	GPAVGIY[+80]NDNINTEMPR	Q9H5V8	CDCP1	pY707	4.99447	-0.220536	-0.221779	-0.241254	-0.221583	-0.129055	-0.212257	-0.231655	-0.211807	-0.227682	-0.101811	-0.195316	-0.151403	-0.228567		-0.157265	-0.224421		-0.216622	-0.214224	-0.233913	-0.192572	-0.224166		-0.229827	-0.191823	0.0619979	-0.188572	-0.190145		-0.198212
Peptide88	GGGPYDAPGGDDSY[+80]I	Q9HBB8	CDHR5	pY844	-0.876213	-0.98275	-0.70226	-0.366543	-0.831748	-0.660855	-0.837364	0.615581	-1.05338	-0.0764984	0.604457	-0.718864	-0.155441	-1.38338	1.21887	-0.208196	0.963646	0.275798	-0.539702	0.471618	3.13096	0.446157	0.156413	-0.139279	-1.31272	-0.110419	0.262978	0.32951	2.46528	-0.445995	0.460338
Peptide150	LGEGTY[+80]ATVYK	Q00537	CDK17	pY203	4.43178	-0.25025	-0.171573	-0.306077	-0.311727	-0.342316	-0.281622	2.90311	-0.160734	-0.275931	-0.163675	-0.189754	-0.255046	-0.266124	-0.137214	-0.281887	-0.282703	-0.221472	-0.249694	-0.338566	-0.25512	-0.221815	-0.263246	-0.21773	-0.328422	-0.258175	-0.232674	-0.271159	-0.273062	-0.27641	-0.250712
Peptide133	IGEGTY[+80]GVVYK	P24941	CDK2	pY15	0.194596	2.29851	-0.933015	-0.165567	0.60643	-0.233238	0.19717	0.54305	0.398607	-1.0579	-0.783849	-0.58346	2.34429	-0.0788267	-0.694359	-0.545547	-0.777606	-0.360623	-0.748579	-0.282828	0.0111711	-0.832087	-0.236401	-0.747584	2.95512	0.683935	-0.339113	-1.07354	-0.307242	1.02106	-0.472566
Peptide132	IGEGT[+80]Y[+80]GVVYK	P24941	CDK2	pT14;pY15	-0.846238	1.20348	-1.17131	-0.389928	0.791244	0.752291	0.416715	0.191956	0.109844	-0.602549	-0.856541	-0.955767	-0.151537	-0.376868	0.0412116	-1.10956	-1.11636	1.77012	-1.60919	-1.20764	0.07416	-0.377739	1.07419	-0.556558	2.07178	1.88064	0.38009	-0.817949	-0.62519	1.448	0.565204
Peptide117	HELQANC[+57]Y[+80]EEVKDR	P23528	CFL1	pY140	0.839089	2.32114	-0.382661	-0.79198	0.498793	-0.959151	1.65747	0.219568	0.984779	-1.27625	-1.34716	-0.288822	-1.43298	-0.427081	-0.940912	0.615397	1.57978	-0.61725	-1.59006	-0.21557	1.5087	-0.321768	0.202978	-0.097049	1.30431	0.693419	-0.16218	-0.400659	-0.725245	0.160615	-0.60925
Peptide235	SNY[+80]YDAYQAQPLATR	P57739	CLDN2	pY194	-0.627403	-0.590066	2.89472	-0.722008	-0.734952	-0.405452	2.12982	0.189072	0.230956	-0.460339	0.190139	-0.738177	0.298645	-0.715067	-0.646463	-0.17832	-0.725742	-0.701671	-0.663121		1.14644	1.20764	-0.233975	-0.549477		-0.536871	-0.384976	-0.630337	-0.761014	2.22205	0.495949
Peptide242	STGPGASLGTGY[+80]DR	O15551	CLDN3	pY214	-0.39528	3.24462	0.660485	-0.457005	-0.52034	-0.505344	-0.551015	-0.391643	1.08923	-0.195661	-0.463584	-0.215149	0.0464413	1.96541	-0.61186	-0.334843	-0.444887	-0.485318	-0.747608	-0.425349	0.276283	-0.236508	-0.663033	-0.597258	-0.323296	2.94844	-0.527056	-0.47428	-0.669385	0.00606878	-0.00128264
Peptide292	VVY[+80]SAPR	O15551	CLDN3	pY198	0.479404	2.46385	1.22577	-0.464993	-0.572646	-0.683372	-0.403834	-0.220093	2.80928	-0.295291	-0.597951	-0.172701	-0.45306	1.08341	-0.443891	-0.336716	-0.724133	-0.416426	-0.61666	-0.544431	0.699863	-0.360678	-0.572799	-0.637497	-0.573656	2.57709	-0.537118	-0.605999	-0.691264	-0.20289	-0.210561
Peptide19	AY[+80]EFAER	Q00610	CLTC	pY1096	-0.31702	-0.166693		-0.574791	2.29206	-0.954272	-0.655558	-0.260451	-0.632962	-0.862478	-0.497462	0.147514	0.809737	-0.0830185	2.39176	-0.309581	-0.293207	0.0619215	-0.0636642		3.045	-0.901051	-0.003391	0.0717793	-0.655172	-0.355351	-0.757262	-0.577636	-0.772309	0.862981	0.0105709
Peptide261	TSIDAY[+80]DNFDNISLAQR	Q00610	CLTC	pY1487	1.22045	2.79423	0.0602028		1.28059	-0.879825	0.00110248	0.0277764	-0.521131	-0.494648	-0.109653	0.461096	-1.0551	-0.664354			-1.05731		-0.882525	-0.861199	0.106163	0.298029	1.35382		-1.08734	1.74592	-0.503884	-0.120883	-0.16798		-0.943548
Peptide75	FASQQGMTAY[+80]GTR	P51911	CNN1	pY182			-0.333728	-0.391876	-0.56919		-0.735589	-0.79157	-0.378234	-0.585833	-0.765477	-0.65368		0.274675	1.35011	2.8822	-0.318113	0.186638	-0.348015		2.20622	1.94581	-0.528236	0.0762804	-0.730133	-0.648309	-0.656927	0.504144	0.132881	-0.727078	-0.396968
Peptide101	GPAY[+80]GLSAEVK	P51911	CNN1	pY12	-0.807193	-0.803179	0.0752914	-0.185344	-0.577912	0.113883	-0.52918	-0.82424	-0.265762	-0.483283	-0.517572	-0.254717	-0.823365	-0.392381	0.00896419	4.19282	-0.669956	0.750176	-0.490349	0.199084	0.980725	1.53084	-0.370298	0.458091	-0.746636		-0.568533	0.781228	0.140996	0.690988	-0.613185
Peptide96	GMSVY[+80]GLGR	Q15417	CNN3	pY261		-0.785476	0.90032	-0.0619365			-0.551194	-0.795484	0.170348		-0.903801	-0.718765	-0.242788	-0.699604	0.0420507	0.537596	-0.760749	-0.148172	-0.261207	0.660032	0.049661	-0.52342	2.70497	3.46149	-0.465452	-0.00460977	-0.395459	-0.31218	-0.23837	-0.387503	-0.2703
Peptide38	DSSTSPGDY[+80]VLSVSENSR	P46108	CRK	pY47	-0.27829	-0.131987	0.0704564	-0.293926	-0.0151117	-0.235915	0.0690894	-0.135789	-0.0660408	-0.543195	-0.42846	-0.202542	1.07285	-0.491254	-0.508225	0.0384149	5.13393	1.44e-05	0.0447704	0.0959102	0.0778529	-0.28334	-0.351615	-0.179899	-0.18387	-0.426472	-0.290362	-0.537802	-0.406774	-0.253393	-0.359026
Peptide37	DSSTC[+57]PGDY[+80]VLSVSENSR	P46109	CRKL	pY48	-0.418857	-0.116066	-0.218906	-0.643392	-0.040315	-1.29423	0.135792	-0.239086	-0.259106	-0.665849	-0.674283	-0.672574	0.788734	-0.367123	-0.414594	0.132193	4.60826	-0.0718239	-0.39934	0.143565	0.263379	-0.233502	-0.531666	0.169762	1.73025	-0.283387	-0.104736	-0.4033	0.0100351	0.286342	-0.216176
Peptide79	FHPEPY[+80]GLEDDQR	O60716	CTNND1	pY280	1.0872	2.0371	-0.0221475	-0.196878	0.293074	-0.669397	0.614947	-0.0221448	2.85368	-1.37733	-0.960457	1.70217	0.532222	1.10888	0.849338	-0.586275	-0.795146	-1.22917	-0.384802	-0.458111	0.502295	-0.797776	-0.978223	-0.487175	0.546511	-0.176868	-0.740483	-1.06346	-0.770111	-0.146971	-0.264502
Peptide124	HYEDGYPGGSDNY[+80]GSLSR	O60716	CTNND1	pY228	0.843766	0.804288	-0.286038	-0.458634	-0.491742	-0.706168	0.521484	0.191182	4.35614	-0.717294	-0.642659	0.125822	-0.427381	-0.254814	1.95211	-0.542442	-0.812278	-0.602728	-0.312964	-0.485549	-0.282953	-0.45493	-0.216689	-0.0967688	0.728207	-0.0765257	-0.367398	-0.591084	-0.436838	0.0743685	-0.333486
Peptide193	QDVY[+80]GPQPQVR	O60716	CTNND1	pY257	1.18346	0.307255	-0.627881	-0.0160962	-0.32716	-0.790048	0.256019	0.258009	2.35181	-0.850504	-0.707083	0.385259	-0.545217	0.878706	3.92594	-0.474564	-0.868328	-0.76319	-0.337753	-0.405995	-0.111026	-0.671227	-0.462152	-0.130305	0.414723	-0.210092	-0.220956	-0.672508	-0.511448	0.268702	-0.526349
Peptide226	SLDNNY[+80]STPNER	O60716	CTNND1	pY904	2.25087	0.423572	-0.299744	0.291268	-0.493818	-0.79044	0.418008	-0.319463	4.23482	-0.847042	-0.705975	0.0105908	-0.0223499	0.0225822	0.601907	-0.689091	-0.58832	-0.744682	-0.48379	-0.555542	0.439188	-0.326168	-0.268991	-0.0413243	0.359379	0.152228	-0.475625	-0.792326	-0.557979	0.280892	-0.482633
Peptide237	SQSSHSY[+80]DDSTLPLIDR	O60716	CTNND1	pY865	2.29918	0.639541	-0.930409	-0.351896	-0.568081	-0.267305	1.04294	-0.103345	2.77467	-1.30427	-1.25796	0.310222	-0.190289	0.313497	1.47705	-0.82251	-0.719852	-0.467767	-0.88656	-0.757497	0.468299	-0.521234	-0.770729	-0.720462	1.02508	1.20319	0.251976	-0.0986903	-1.21171	0.0649528	0.0799631
Peptide319	Y[+80]RPSMEGYR	O60716	CTNND1	pY241	1.10083	0.959861					-0.258283	-0.0623408	-0.707198	1.20035	-0.545869	-0.443201		2.94975	-0.503328			-0.903535				-0.505072	-0.749326	-0.321368	-0.0621363	-0.519046			-0.630088
Peptide168	LYGDADY[+80]LEER	P17812	CTPS1	pY473	-0.263897	-0.146869	-0.260695	-0.262068	-0.204942	-0.216988	-0.214443	-0.219584	-0.227964	-0.269854	-0.251007	-0.218018	0.542124	-0.239615	-0.264539	0.0803869	5.23357	-0.195429	-0.158385	-0.203355	-0.138307	-0.225803	-0.211007	-0.263085	-0.177359	-0.190987	-0.214183		-0.151829	-0.204339	-0.261532
Peptide158	LPSSPVY[+80]EDAASFK	Q14247	CTTN	pY421	2.61355	0.382419	-0.477942	0.232767	-0.31916	-0.863696	0.183376	-0.450486	3.64094	-1.00744	-0.402953	-0.406127	-0.750129	-0.777578	-0.469738	-0.367775	-0.702981	-0.305454	-0.626453	-0.540344	-0.342761	-0.297429	0.282572	0.899298	0.349295	-0.152697	-0.450166	-0.248003	0.742785	1.3178	-0.685503
Peptide99	GNPPHSAPC[+57]VPNGSALLLSNPAY[+80]R	Q08345	DDR1	pY513				-0.253071		-0.485176	-0.439402	-0.512814	0.859766	-0.208503	-0.295491	-0.463022	-0.0399583	-0.254823	2.09169	-0.411717	-0.519633	-0.302468	-0.328008	-0.486836	-0.00349678	1.22488	-0.508551	-0.0575893	-0.40137	-0.372691	-0.477789	-0.412628	-0.419503	3.99266	-0.514458
Peptide131	IFPLRPDY[+80]QEPSR	Q16832	DDR2	pY481	-0.648843	-0.734238	0.668853	0.0986815	-0.761955	-0.570137	-0.500433	-0.823081	1.07693	-0.809802	-0.233396	-0.742844	-0.697023	-0.67948	0.430222	3.6442	-0.605761	-0.238875	-0.0234233	-0.196567	0.91215	1.22007	0.137748	2.26986	-0.688882	-0.752814	-0.685116	0.215165	0.297467	-0.0185362	-0.560143
Peptide330	YGTC[+57]IY[+80]QGR	P59665	DEFA1	pY85		-0.670026		-0.337129	-0.44163	4.58336	-0.513261	-0.648758	-0.525612	-0.533075	-0.272447	-0.251585	0.411476	-0.332017	-0.258992	-0.576864	0.200204	-0.239688	0.734298	0.262952	-0.3231	-0.144165	-0.577987	-0.206082	0.513423		-0.255461	-0.266813		-0.0790874	0.748064
Peptide73	FANY[+80]IEK	P17661	DES	pY122	-0.0557018	-0.29049	-0.0923568	-0.160294	-0.759278	-0.382482	0.136519	-0.335087	0.37533	-0.612753	0.20802	-0.318944	-0.520596	0.194335	-0.466786	3.35162	-0.428006	0.657749	-0.267204	-0.363845	3.24956	0.477584	-0.384365	-0.451525	-0.596021	-0.919394	-0.649334	-0.387632	1.30897	-0.699881	-0.817708
Peptide74	FASEASGY[+80]QDNIAR	P17661	DES	pY363	-0.319279	-0.333373	-0.165634	-0.321979	-0.32761	-0.33668	-0.329079	-0.330465	-0.30748	-0.330215	-0.240398	-0.335153	-0.323243	-0.27597	-0.331515	4.93233	-0.231415	0.329961	-0.300315	-0.334429	1.78618	0.0566868	-0.331815	-0.297364	-0.323246	-0.0312469	-0.279682	0.0858359	0.222344	-0.336085	-0.339674
Peptide195	QEMMEY[+80]R	P17661	DES	pY324	-0.252113	-0.29901	0.885069	-0.327715	0.544988	-0.0685095	-0.570705	-0.540728	-0.219314	-0.412401	-0.376455	-0.526933	-0.234541	-0.368162	-0.489192	4.0308	-0.288509	0.13292	-0.345629	-0.162848	2.88394	0.517132	-0.513651	-0.350625	-0.519518	-0.499719	-0.569284	-0.386651	0.262876	-0.425188	-0.510325
Peptide47	DYEVDGRDY[+80]HFVTSR	Q12959	DLG1	pY760	0.923829	0.639085	-0.357934	-0.4397	-0.445718	-0.565893	0.214074	4.46669	0.842197	-0.729564	-0.555056	-0.493757		-0.582333	0.639059	0.157872		-0.512894	-0.792997	-0.667615	-0.110617	-0.499361	-0.577051	-0.466618	0.386048	0.350364	-0.211563	-0.648965	-0.500903	0.110316	0.429006
Peptide43	DY[+80]HFVTSR	Q12959	DLG1	pY760	1.39869	2.40881	-0.381318	-0.870416	-0.556808	-0.748225	0.958315	0.49969	1.21882	-1.01542	-0.295313	-0.559186	-1.0843	-0.348866	-0.997609	1.55803	-1.22367	-0.847529	-0.926686	-0.879529	1.12437	-0.450828	-0.676021	-0.53539	1.32016	1.09744	0.15277	-0.599238	-0.650394	1.07459	0.835054
Peptide32	DNEVDGQDY[+80]HFVVSR	Q92796	DLG3	pY673	2.46093	0.804014	1.33274	-0.506855	-0.0064972	-0.711211	1.08534	-0.357691	2.89519		-0.772744	-0.718979	-0.632912		-0.546818	-0.614934		-0.774845	-0.705265		-0.335436	-0.333892		-0.227672	0.761089	0.27228	-0.540431	-0.759111	-0.687752	0.279033	-0.657576
Peptide116	HAQDY[+80]VLTYNYEGR	Q02487	DSC2	pY853	0.868498	0.415015		-0.539135	-0.299721	-0.323687	1.38435	-1.06843		-0.793378	-1.02724				-0.608775		2.9692		-0.995615			0.376148	-0.699262	0.202092	-0.540476	1.17459			0.157997	-0.117723	-0.534442
Peptide337	YTY[+80]SEWHSFTQPR	Q14574	DSC3	pY818		-0.711174	-1.03221	2.34548		1.10413		-0.0178655	1.2741	-0.887919	-0.651221			-0.682557	1.01306		-0.679953	-0.716841	0.0269539	-0.810521		-0.107908	0.754918	-0.338539	0.121889	-0.109285	-0.400185	-0.779096	-0.710006	2.54051	-0.545759
Peptide5	AESGPDLRY[+80]EVTSGGGGTSR	P15924	DSP	pY28	0.546741	-0.682283	0.203614	-0.66094	0.752616	0.11748	3.67366	0.884377	0.448868		-0.725777	-0.770841	-0.911027	0.857735	-0.111533			-0.659604	0.355767		-0.402887	-0.598167	-0.41667	-0.330853	-0.481676	-0.687275	-0.864211	-1.13002	0.182035	1.67423	-0.263364
Peptide95	GLIDRDLY[+80]R	P15924	DSP	pY2159		-0.390282	0.319462	-0.314142	-0.520447	-0.454335	-0.254699	-0.330472		-0.452512	-0.287938	-0.530732	-0.441943	-0.230757	-0.233639	0.190665	2.6405	0.485325	0.153589	-0.150641	-0.627891	-0.326572	-0.336856	0.538865	-0.449723	-0.502477	-0.245895	-0.393243	-0.503428	4.09916	-0.448938
Peptide110	GVITDQNSDGY[+80]C[+57]QTGTMSR	P15924	DSP	pY56	3.16726	-0.193621	-0.62102	2.9695	0.128704	-0.547944	1.74949	0.309905	-0.117934	-0.78763	-0.596499	0.26523	-0.237018	0.00329518	1.03161	-0.629268	-0.732949	-0.507259	0.615376	-0.631935	-0.364583	-0.58442	-0.380118	-0.715078	-0.541234	0.320947	-0.616204	-0.703844	-0.536814	0.117388	-0.633342
Peptide209	RGVITDQNSDGY[+80]C[+57]QTGTMSR	P15924	DSP	pY56	1.46278	-0.165596	-0.140305	-0.165705	-0.00584411	-0.00794746	4.39157	1.13827	0.60813	-0.791269	-0.693184	-0.128672	-0.151333	-0.774834	0.633738	-0.568362	-0.906357	0.106831	0.0578061		-0.393501	-0.357135	-0.629933	-0.648676	0.0133643	-0.442105	-0.551938	-0.718065	-0.0763519	0.399863	-0.495248
Peptide298	VYNDGYDDDNY[+80]DYIVK	Q13627	DYRK1A	pY145	-0.826531	2.86895	-0.859534	-0.497059	1.80226	-0.243085	1.73534	1.30716	-0.863927	-0.0991813	-0.203477	-0.228318		-0.393635		0.48625	-0.533134	-0.819184	0.394523	0.450377	-0.773538	1.58623	-0.790133	-0.84363		0.31908	-0.707796	-0.651257	-0.205725	-0.742069	-0.668952
Peptide143	IYQY[+80]IQSR	Q9Y463	DYRK1B	pY273	0.608255	1.11873	-0.825557	-1.33935	-0.992072	-0.148084	1.16736	2.69281	0.631127	-1.76128	-0.539973	-1.01698	-0.648516	-0.0266632	0.985722	0.401908	-1.70536	-1.02995	-0.619105	0.170279	0.866447	-0.318275	0.250358	0.148788	0.935605	0.199353	-0.388473	-0.217111	0.170824	1.77354	-0.544364
Peptide299	VYTY[+80]IQSR	Q92630	DYRK2	pY382	0.98157	-0.445009	-0.518419	-0.325432	2.01071	0.574605	-0.392431	2.08195	1.95216	-0.721658	0.326678	-0.787008	-0.239847	-0.710942	0.741873	1.45472	-0.471294	-1.1525	0.486038	0.105275	-0.18821	1.01562	-0.500447	-0.421202	-0.124137	-0.11797	-1.03642	-1.84291	-1.11671	0.711494	-1.33014
Peptide263	TTENNYC[+57]PHY[+80]EK	P98172	EFNB1	pY317	0.334248	3.1686	0.897116	-0.94542	-0.659961		-0.534978	-0.58164	1.02726	-0.891619	-0.559423		0.556164	-0.382171	-0.42643	0.0540617			-1.02538		0.0414238	0.110971	-0.653007	1.20046	-0.610314	2.16859	-0.452607	-0.797802	-0.552554	-0.160865	-0.32473
Peptide33	DPHYQDPHSTAVGNPEY[+80]LNTVQPTC[+57]VNSTFDSPAHWAQK	P00533	EGFR	pY1138						-0.467151	2.50078			-0.593005	0.901078	0.373823	-1.07237	-0.69918			-0.714695		-0.92022	-0.737299	-0.189273	-0.4091	-1.16222		1.44907		0.566958		0.690279		0.482531
Peptide105	GSHQISLDNPDY[+80]QQDFFPK	P00533	EGFR	pY1172		-0.387754	0.332916	0.563384		-0.531823	-0.389925	3.04972	-0.0849869	-0.372133	-0.503201	-0.416894	-0.454363	-0.182543		-0.427127	-0.426375		-0.545579	-0.475367	-0.373581	-0.580548	-0.416877		3.18357	0.806564	-0.510458	-0.129799	-0.425965		-0.300851
Peptide107	GSTAENAEY[+80]LR	P00533	EGFR	pY1197	0.946145	0.67705	-0.323329	-0.183276	-0.410477	-0.550308	0.522669	0.158549	4.64895	-0.788691	-0.482777	-0.192507	-0.541443	-0.586712	-0.488834	-0.146378	-0.61246	-0.614822	-0.530971	-0.65441	0.111004	-0.140893	-0.482984	0.278805	0.241733	0.951291	-0.505946	-0.574482	-0.0333893	0.836802	-0.527912
Peptide174	MHLPSPTDSNFY[+80]R	P00533	EGFR	pY998	0.669857	-0.158169			-0.342269	-0.484734	-0.287361	-0.39867	0.814785	-0.491282	-0.477886	-0.295534	-0.440048	0.0555357	4.29648		-0.51442				-0.0212517	-0.403176	-0.489661		-0.280066	0.07608	-0.107099		-0.44588	0.0289603	-0.304189
Peptide211	RPAGSVQNPVY[+80]HNQPLNPAPSR	P00533	EGFR	pY1110		-0.0801195		-0.255557			-0.209217	-0.260009	0.307726	4.54481	-0.327884	-0.293897	-0.183073	-0.300605		-0.270467	-0.291201		-0.193178		-0.261911	-0.237618	-0.305614	-0.156248	-0.125347	-0.0959205	-0.332315		-0.270908	-0.0965357	-0.304907
Peptide316	Y[+80]LVIQGDER	P00533	EGFR	pY978	-0.06012	-0.412241	-0.25781	-0.392872	-0.308684	-0.500706	-0.0263873	-0.363769	-0.468585	-0.0882008	4.90787	-0.25918	0.282712	-0.0203969		0.0243399	0.152741	-0.171908	-0.133736	-0.650592	-0.398648	0.32063	0.220797	-0.485611	0.0450402	-0.536656	-0.0128724	-0.557097	0.15194
Peptide156	LLDDFDGTY[+80]ETQGGK	P21709	EPHA1	pY781	0.115355	0.687309	-0.474014	-0.499456	-0.24197	-0.619882	-0.255751	-0.336663	4.84809	-0.505957	-0.435166	-0.213879	-0.504692	0.404606	-0.457656	-0.188674	-0.413155	-0.211574	-0.615093	-0.34768	1.04929	0.218145	-0.440919	-0.444061	0.202534	0.32608	-0.353076	-0.397935	-0.534684	0.860562	-0.220022
Peptide202	QSPEDVY[+80]FSK	P29317	EPHA2	pY575	-0.486618	-0.192276	-0.412341	-0.562791	-0.511251	0.135982	-0.459426	0.695628	-0.0120248	-0.50173	-0.270328	0.0486941	-0.234635	-0.292691	-0.105909	-0.47347	-0.217247	-0.413378	-0.490759	-0.455974	-0.427955	-0.202926	0.715803	-0.250147	-0.178323	-0.138115	-0.426634	0.932917	4.95172	0.589521	-0.353315
Peptide268	TYVDPHTY[+80]EDPNQAVLK	P29317	EPHA2	pY594	1.55762	0.852563	0.0148295	-0.880378	0.497357	-0.69022	-0.239372	0.233876	4.1921	-0.595754	-0.075837	-0.574611	-0.286912	-0.596793	0.872658	-0.190726	-0.740883	-0.701462	-0.819685	-0.842791	0.687528	0.0841782	-0.0915943	-0.408036	-0.563557	0.846434	-0.43167	-0.619753	-0.831026	0.560593	-0.218675
Peptide267	TY[+80]VDPHTYEDPNQAVLK	P29317	EPHA2	pY588	1.36967	0.446483	0.390701	0.618541	0.343342	1.9782	-0.271755	-0.632655	3.22468	-0.341552	-0.476723	-0.91014	-0.531511	-0.396365	0.108617	-0.387784	-0.904769	-0.975558	-0.371531	-1.19721	2.2216	-0.166218	-0.611473	-0.30448	-0.193887	0.190856	-0.220763	-0.56506	-0.771872	0.253927	-0.915317
Peptide286	VLEDDPEATY[+80]TTSGGK	P29317	EPHA2	pY772	0.817576	0.363003	-0.161248	-0.269676	0.240594	-0.310662	-0.170551	-0.140371	4.65803	-0.832957	-0.31052	-0.579073	0.0971644	-0.370154	0.633761	-0.447549	0.205164	-0.859505	-0.825813	-0.522391	0.339965	0.382299	-0.165999	-0.362117	-0.159127	0.471181	-0.676288	-0.675863	-0.906062	0.991034	-0.453842
Peptide285	VLEDDPEAAY[+80]TTR	P54764	EPHA4	pY779	0.0709876	-0.192336	-0.190305	-0.186653	-0.21151	-0.21104	0.0104386	5.37662	-0.081638	-0.228796	-0.210953	-0.218858	-0.200408	-0.224645	-0.164277	-0.183765	-0.182723	-0.213926	-0.204952	-0.205078	-0.197477	-0.179383	-0.159067	-0.189277	-0.208733	-0.204569	-0.218262	-0.210216	-0.204477	-0.156801	-0.217926
Peptide304	WTAPEAIAY[+80]R	Q9UF33	EPHA6	pY850	0.170432	3.1651		-0.392225	-0.13669	-0.341653	-0.19633	-0.158993	-0.346915	-0.363289	-0.367121	-0.382736		-0.530315	-0.462345	-0.0598954		-0.254222			-0.117508	-0.338813	-0.295601	-0.453172		3.37343	-0.301186	-0.298167	-0.544559	-0.464901	0.097675
Peptide282	VIEDDPEAVY[+80]TTTGGK	Q15375	EPHA7	pY791	-0.29248	-0.219824	2.12304		-0.526592		-0.234368	-0.522414	1.73799		-0.481898			-0.504186		2.74137	-0.488161	-0.496004	-0.508248		-0.150535	-0.347946		-0.517325				-0.406906	-0.421134	-0.48438
Peptide141	IYIDPFTY[+80]EDPNEAVR	P54762	EPHB1	pY600	2.57046	1.16503	-0.32224	-0.464444	-0.412391	-0.409417	-0.0636753	0.0988808	4.14197	-0.49416	-0.491211	-0.482205	-0.501997	-0.313818	-0.167384	-0.225855	-0.576617	-0.453871	-0.506487	-0.544922	0.0846966	-0.319033	-0.303389	-0.343535	-0.225219	0.965446	-0.387871	-0.496699	-0.518488	0.0237611	-0.025307
Peptide81	FLEDDPSDPTY[+80]TSSLGGK	P54753	EPHB3	pY792	0.407523	3.36078	-0.644395	-0.39894	-0.311625	0.566287	0.0138749	-0.246164	-0.220403	-0.475788	-0.387007	-0.0698865	1.20396	-0.628381	-0.597703	-0.22427	-0.287935	-0.429229	-0.65073	-0.529106	-0.368669	-0.270001	-0.300091	-0.532274	-0.438062	3.44823	-0.413226	-0.536566	-0.665995	0.123661	0.502129
Peptide159	LQQY[+80]IAPGMK	P54753	EPHB3	pY600	0.124864	3.52986	-0.518633	-0.283122	-0.205043	0.240799	-0.187217	-0.160577	-0.39611	-0.43959	-0.359812	-0.122398	1.36455	-0.538006	-0.550635	-0.0386636	-0.456679	-0.416561	-0.579571	-0.439317	-0.345477	-0.115473	-0.350604	-0.504807	-0.535113	3.38762	-0.423909	-0.457366	-0.607737	0.0377965	0.34693
Peptide333	YLSEMNY[+80]VHR	P54753	EPHB3	pY754	-0.282685	2.49819		-0.781684	-0.446735	-0.291374	-0.577345	-0.434796	-0.668867	-0.931983	-0.368659	0.0109703	-0.22393			-0.490099		0.348397		-0.644153		0.240498	-0.500945			3.04882	-0.727759	0.816705		-0.0186495	0.426089
Peptide57	EIDVSY[+80]VK	P54760	EPHB4	pY614	0.505887	1.20727	1.73461	-1.29608	2.47543	-0.501447	-0.085916	-1.12498	-0.497946	0.870852	-0.992488	-1.13367	1.30725	-0.818533	0.721195	-0.739449	0.0334406	-1.32284	0.895933	0.137813	0.743564	-0.283778	-1.01421	1.49141	-0.663217	-0.817772	-0.0458753	-0.718634	0.437829	0.386556	-0.892208
Peptide296	VY[+80]IDPFTY[+80]EDPNEAVR	P54760	EPHB4	pY590;pY596		4.34188	-0.378335	-0.382516	0.286533	-0.285313	0.370248	0.17176		-0.375955	-0.406017	-0.357954	-0.345324	-0.437522		-0.38573	-0.446108	-0.189002	-0.418798	-0.356501	-0.297519	-0.344221	-0.197425		0.222945	2.02734	-0.404247	-0.420873	-0.437043	-0.334375	-0.219932
Peptide109	GTPTAENPEY[+80]LGLDVPV	P04626	ERBB2	pY1248	0.706886	-0.283184	-0.353479	-0.537335	-0.448595	-0.708913	0.163219	-0.279525	4.55087	-0.352432	0.413954	-0.191516	-0.497362	-0.478829	1.68236	-0.30502	-0.466821		-0.523807	0.0908234	-0.261433	-0.508061	0.211095	0.0329479	-0.149714	-0.359416	-0.759981		-0.361594	0.0930772	-0.118213
Peptide227	SLEATDSAFDNPDY[+80]WHSR	P21860	ERBB3	pY1328	0.361944	1.35766	-0.0557255	-0.282652	1.11433	1.78215	1.08452	0.420306	3.43035	-0.921451	-0.634599	-0.55751	-0.536486	-0.672476	-0.736696	-0.257774	-0.761485	-0.538118	-0.565112	-0.613313	0.655425	-0.725587	-0.896371	-0.402756	0.527577	0.917753	-0.812691	-0.845775	-0.667292	0.640667	-0.808812
Peptide186	NQETY[+80]ETLKHEKPPQ	P30273	FCER1G	pY76	-0.871095	-1.04915	1.25116	-0.533651	-0.278096	0.494402	0.366363	-0.668734	1.54921	-1.22891	-0.968339	0.805787	0.441186	-1.17839	0.807191	-0.598785	2.27007	-0.678615	0.635764	0.250088	-0.762474	0.206568	2.32574	-0.216953	-0.865081	-1.05857	-1.12723	-0.847899	0.271901	1.08321	0.17332
Peptide154	LIKDDEY[+80]NPC[+57]QGSK	P09769	FGR	pY412	-0.588901	-0.491079	-0.338487	-0.357623	-0.287506	0.175262	-0.474388	-0.562597	0.246568	-0.493759	-0.327568	1.06294	0.826648	-0.245652	-0.522589	-0.314588	4.88856	0.0545047	0.168113	0.1911	-0.493749	-0.314665	-0.493177	-0.322865	0.227219	-0.548666	-0.547367	-0.140006	-0.575311	0.395854	0.203775
Peptide199	QLLY[+80]SENK	P42685	FRK	pY132	0.709157	-0.179721	0.155788	-0.28391	1.24719	0.0999162	-0.601981	-0.830399	1.71248	-0.860768	-1.01909	0.944773	1.1979	0.574627	-0.435605	1.37755	-0.135508	-0.19442	-0.337443	1.02325	2.14347	-1.16588	-0.508963	-1.11014	0.0912093	-0.509747	-1.31051	-1.21394	-1.20159	1.639	-1.0167
Peptide274	VDNEDIY[+80]ESRHEIK	P42685	FRK	pY387	0.0513546						0.283047			-0.407485	-0.133962	2.90273		-0.366735	-0.604814	-0.471402	-0.586506	-0.582293	-0.0171575		-0.488067	-0.480849	-0.321868	-0.503962		2.41382			-0.262868		-0.422985
Peptide262	TTAVEIDY[+80]DSLK	O15117	FYB1	pY571	-0.403804	-1.02074	1.50316	-0.978649	-0.553687	0.817799	0.36534	-1.21649	1.44133	-1.41773	-0.678979	0.125939	-0.224804	-1.22064	0.853909	-0.651054	1.08544	-0.650251	-0.99828	-0.00790096	-0.699498	0.445465	0.655967	-0.0779166	0.630934	-1.04424	0.725241	-0.920685	1.74313	2.46968	-0.0979926
Peptide279	VGFQY[+80]EGTYK	P11413	G6PD	pY503	-0.893267	-0.26262	-0.668448	-0.63741	-0.492342	-0.0182202	-0.150813	-0.866711	-0.187692	-1.03595	-0.513586	0.129325	0.149212	0.515265	-0.196124	-0.463987	4.4861	-0.0926737	0.65845	1.19156	-0.331492	-0.404266	0.0138169	-0.28029	1.02457	-0.634158	-0.382404	-0.461413	0.523614	0.800065	-0.518114
Peptide22	DASSQDC[+57]Y[+80]DIPR	Q13480	GAB1	pY406	0.449009	1.36652	-0.0161124	-0.516439	-0.509189	-0.778655	0.545007	-0.144468	4.47907		-0.587984	-0.606742	-0.769793	-0.608038	-0.251227	-0.165546	-0.56379	-0.644209	-0.461071	-0.520161	0.374963	-0.0328632	-0.323008	0.723828	0.363306	0.742129	-0.44464	-0.61466	0.0283091	0.114005	-0.62755
Peptide205	QVEY[+80]LDLDLDSGK	Q13480	GAB1	pY627		3.25629		-0.751319	-0.591058	-0.876638	1.13346	0.72073	0.358659		-0.87776	-0.47783	-0.731525	-0.667198		-0.175133	-0.248803	-1.0677	-0.718992	-0.743882	1.32387	0.843666	-0.302524	0.38024	0.620216	1.47598	-0.0662555		-0.309377	-0.750894	-0.756227
Peptide239	SSGSGSSVADERVDY[+80]VVVDQQK	Q13480	GAB1	pY659	-0.068178	0.309365	-0.105767	-0.412621	-0.29553	-0.454483	0.236925	-0.200697	5.08482		-0.445331	-0.37781	-0.416607	-0.411205	-0.440663	-0.175665	-0.328874	-0.328781	-0.314044	-0.379794	0.251387	0.02989	-0.26372	0.00396497	0.710119	0.101008	-0.333225	-0.384921	-0.128318	-0.0375973	-0.423642
Peptide251	TASDTDSSY[+80]C[+57]IPTAGMSPSR	Q13480	GAB1	pY373	0.512018	1.37407	-0.396809	-0.569292	-0.398532		0.337683	-0.236178	4.2156		-0.545053	-0.727955		-0.676883	-0.547673	-0.105217		0.21352			0.00220108	-0.18002	-0.627783	-0.135356	0.0301156	0.21474	-0.634343	-0.417748	0.189196	-0.194488	-0.695811
Peptide275	VDY[+80]VVVDQQK	Q13480	GAB1	pY659	-0.0544345	0.508273	-0.19985	-0.443367	-0.39054	-0.54802	0.387134	-0.162828	4.95158	-0.536915	-0.489761	-0.365794	-0.459321	-0.375716	-0.464216	0.0229521	-0.373381	-0.465757	-0.211071	-0.181092	1.19501	-0.053124	-0.416538	-0.135831	0.488184	0.155832	-0.444417	-0.434991	-0.252478	0.277745	-0.52726
Peptide39	DSTY[+80]DLPR	Q9UQC2	GAB2	pY266	0.972483	1.13764	-0.629485	0.500675	0.66308	-0.0508008	0.364183	0.18496	3.2963	-1.31993	-0.422212	-0.530453	0.599156	-1.05219	-0.228725	0.440817	0.197605	-0.822636	-0.38886	1.34148	1.22953	-1.1686	-0.0238943	-0.508581	-0.800823	-0.467199	-1.68266	-1.02803	0.87701	-0.0461384	-0.633711
Peptide188	NY[+80]VTPVNR	P62993	GRB2	pY209	-0.431012	0.552608	1.73076	-0.335022		0.27871	-0.683601	-0.114628	0.68263	-1.00178	-0.874439	-0.672451	-0.822922	1.10986	-0.0961125	0.0503328	-1.05931	-0.212832			2.96714	-0.516879	-0.215216	2.19824	-0.517739	0.586307	-0.775891	-0.737572	-0.988086	0.385014	-0.486108
Peptide87	GEPNVSY[+80]IC[+57]SR	P49840	GSK3A	pY279	1.4559	0.389971	-0.512853	-0.793436	-0.441327	-0.728795	1.12108	-0.641176	2.37345	-1.32347	0.171129	-0.851174	-1.03635	-0.399485	-0.0345661	2.18437	-1.4246	-0.521332	-0.200813	-0.830171	1.0293	0.840583	0.113295	-0.220427	0.0980247	0.98478	-0.7064	-0.687124	-0.111793	1.6222	-0.918789
Peptide256	TLDNGGFY[+80]ISPR	P08631	HCK	pY209	-0.876301	-1.11973	-0.583364	-0.59635	-0.597134	1.05273	-0.267416	-0.643433	0.232779	-1.51335	-0.812377	-0.354238	0.617148	-0.462456	-0.0176286	-0.986658	2.52893	0.278624	1.94497	1.8109	-0.560396	-0.287448	-0.306551	0.0348987	1.12824	-1.18413	-0.223816	-0.648484	0.536417	1.77861	0.0970084
Peptide173	MDY[+80]VEINIDHK	Q00341	HDLBP	pY437					0.00539108	-0.476484	3.84464	-0.400153	-0.390688	-0.302943	-0.525639	-0.477414	-0.442234	-0.457814		-0.205593	1.01148		-0.485701	-0.426853	-0.275398	-0.420024	1.59619		-0.27641	-0.277279	-0.376202		-0.308063		0.0671909
Peptide63	ELY[+80]GEVIR	Q92835	INPP5D	pY221	-0.992526	0.912246	1.73108	-0.992113	0.120458	-1.04885	-0.551925	1.82603	-0.928153	-0.221572	-1.00783	-0.992657	-1.01475	-0.477464	0.765985	-0.630796	-0.767975	0.975778	-1.06612	-0.827347	0.268978	-0.706688	-0.819644	1.35739	1.04669	-0.560614	1.31165	0.685628	1.75576	-0.208295	1.05764
Peptide164	LY[+80]DFVK	Q92835	INPP5D	pY865	-0.284189	-0.426163	1.35092	-0.442822	-0.391224	-0.435534	-0.352271	-0.460471	-0.185809		0.0455674	-0.332843			0.211468	-0.459006	4.3431	-0.469398	-0.458216		-0.0738359	-0.104641	0.317177	-0.441823	-0.14906	-0.456852	-0.477653		-0.463221	0.596793
Peptide15	APYTC[+57]GGDSDQY[+80]VLMSSPVGR	Q9Y4H2	IRS2	pY823	1.15367	-0.121707	-0.592975	2.36073	0.803798	-0.794088	-0.0854653	-0.00949229	3.60973		-0.0855046	-0.820289	-0.69547	-0.826045	-0.33874	-0.72125		-0.236059	-0.863019	-0.677594	-0.132429	-0.136663	-0.800851	0.63195	0.584375	-0.369606	-0.210208	-0.543555	0.686638	-0.462472	-0.307414
Peptide302	WDTGENPIY[+80]K	P05556	ITGB1	pY783	-0.468588	0.996352	0.182177	-0.0467528	-0.364676	-0.491323	-0.066716	-0.854496	3.96253	-0.997928	-0.493749	-0.335311	0.247897	-0.522105	0.0707612	0.947684	-0.804563	-0.828784	-0.36019	-0.433282	0.404506	0.613002	0.207401	1.6348	-0.965668	1.14565	-1.01536	-0.765628	-0.737545	0.192067	-0.052174
Peptide46	DY[+80]STLTSVSSHDSR	P16144	ITGB4	pY1510	1.01664	0.758687	-0.68059	-0.687376	-0.508984	-0.537181	0.183325	0.0719978	4.31598	-0.787933	-0.253549	-0.247049	-0.055922	0.0383822	-0.0737151	0.356322	-0.984059	-0.63902	-0.84777	-0.729899	0.646851	-0.325455	-0.268621	-0.641106	0.226568	0.41484	-0.268686	-0.769988	-0.335174	1.64926	-0.036762
Peptide272	VC[+57]AYGAQGEGPY[+80]SSLVSC[+57]R	P16144	ITGB4	pY1207	1.55111	0.829119	-0.482779	-0.498882	2.3818	-0.937433	0.902144	-0.0461356	2.0075	-0.978944	-0.535371	-0.789003	-1.03621	-0.450519	0.672482	-0.495286		-0.801036	-1.05706	-1.04057	0.160252	-0.548753	-0.303064	-0.56085	0.591153	0.670786	-0.694564	-0.78552	0.446212	2.10608	-0.276654
Peptide53	EEPEALY[+80]AAVNK	Q9NZM3	ITSN2	pY968	1.04353	0.177006	1.99061	-0.722384	-0.009838	-0.477649	1.91143	0.478973	2.25325	-1.55488	-0.684484	0.135244	-0.625911	-1.3082	0.501965	-1.3034	-1.23284	-0.661029	0.291344	-0.308518	-0.158536	-0.292625	1.42025	0.313396	-0.0690246	-0.658069	-0.345944	-1.25225	0.987199	0.702117	-0.540734
Peptide155	LIY[+80]LVPEK	Q9NZM3	ITSN2	pY553	0.62518	-0.023002	-0.146548	-0.0283714	2.13866	-0.734995	2.46319	0.373061	1.78182	-1.14813	-0.838142	-0.382059	-0.586567	-0.350512	0.22124	-0.856297	0.133044	-0.644034	-0.330444	-0.844078	-0.311932	-0.432488	-0.700431	-0.435786	1.47486	-0.194531	-0.673209	-0.904136	-0.0968384	2.29253	-0.841041
Peptide208	REEPEALY[+80]AAVNK	Q9NZM3	ITSN2	pY968	0.216699	-0.703088	0.818722	-1.07026	-0.420203	-0.749581	1.31425	-0.0420141	2.76279	-1.26065	1.63638	-0.220722	-0.95222	-0.96746	0.533725	-1.6784	0.267232	-0.482764	-0.4996	-0.99777	-0.708108	0.0403808	1.56008	0.697356	0.387813	-0.179409	-0.284973	-0.804117	1.30343	0.781436	-0.298955
Peptide42	DWSHY[+80]FK	P05783	KRT18	pY129	0.0154921	-0.0958738	-0.152485	-0.177219	-0.13472	-0.089832	-0.154406	-0.110666	-0.140745	-0.188182	-0.205767	-0.228875	-0.189963	-0.184404	-0.117502	-0.203573	5.37733	-0.215939	-0.180064	-0.198289	-0.237892	-0.188701	-0.201214	-0.304868	-0.272357	-0.127598	-0.268069	-0.265144	-0.220746	-0.158372	-0.179358
Peptide48	DYSHY[+80]YTTIQDLR	P08727	KRT19	pY130	-0.09288	-0.443929		-0.377887	3.82674	-0.260465	0.419774		-0.312442	-0.407689	-0.367286	-0.424728	-0.383739	-0.441851	0.0359145	-0.341419	0.999808		-0.339396	-0.447444	-0.40225	-0.295452	2.85594	-0.441887	-0.337241	-0.238962	-0.387681	-0.333603	-0.380383	-0.350125	-0.329446
Peptide17	AQY[+80]EDIANR	O95678	KRT75	pY327	4.10757	-0.447996	-0.356762	-0.703574	-0.231944	-0.620481	-0.205222	-0.338174	0.648185	-0.248717	-0.624075	0.72597	-0.655999	1.04635	-0.153615	-0.240111	0.386072	-0.206557	-0.301012	-0.484325	1.57213	-0.400438	-0.314387	-0.639849	-0.295028	-0.738317	-0.315597	1.77685	-0.815181	-0.643984	-0.281774
Peptide153	LIEDNEY[+80]TAR	P06239	LCK	pY394	0.776627	-0.490417	1.40642	-0.038195	-0.197258	-0.532793	0.408339	0.212077	4.44799	-1.25551	-0.475277	-0.702307	-0.206946	-0.662497	0.614932	-0.255158	-0.413613	-0.795879	-0.124438	-0.536294	0.198496	-0.0616771	0.533168	0.286985	-0.624592	-0.352849	-0.526358	-0.628621	0.0657075	0.645538	-0.715602
Peptide179	NLDNGGFY[+80]ISPR	P06239	LCK	pY192	-0.166446	-0.8601	-0.0257103	-0.80565	-0.0733195	-0.237423	-0.114646	1.52918	0.119468		-0.70465	-0.886473	0.726755	-0.647758	0.892928	-0.962029	0.015974	-0.593612	-0.347958	0.762395	-0.531224	-0.0565629	0.37151	-0.36395	-0.537475	-1.02056	0.0771123	-0.353872	3.05012	2.78327	-1.03928
Peptide244	SVLEDFFTATEGQY[+80]QPQP	P06239	LCK	pY505		-0.332073	-0.363289	4.42334	-0.0434313	-0.00362477	-0.220085	0.0133531	-0.0446194	-0.416419	-0.32823	-0.377444	0.168192	-0.388273		-0.388889	-0.377238		-0.388136	-0.374143	-0.363421	-0.350517	-0.172107		-0.249104	-0.262353	-0.329504	-0.381017	-0.0930177	2.03067	-0.388619
Peptide177	NHQLY[+80]C[+57]NDC[+57]YLR	Q8WWI1	LMO7	pY1667	-0.0391395	-0.748111	2.14824		0.250005	-0.0860949	-1.43783	-0.776997	1.13018	-0.508467	-0.808731	-0.982713	-1.29529	0.925137	0.370381	-1.30033	0.634695	-0.367653	-0.243645	-0.747642	1.7702	1.51858	-0.467253	1.62177	0.598795	-0.481645	-0.459466	-1.34193	-0.226021	1.20227	0.1487
Peptide222	SGDLPY[+80]DGR	Q86X29	LSR	pY586	-0.259585	2.04099	-0.10931	0.157316	-0.662246	-0.817187	-0.816051	0.0366748	1.45182	-0.200208	-0.723095	-0.60764	2.37245	1.13493	-0.066483	-0.511707	-0.390729	-0.0347085	-1.0141	-0.500953	2.07656	-0.382046	-0.753185	-1.09494	-0.24545	1.7826	-0.758586	-0.954882	-0.986483	0.537298	0.298941
Peptide241	SSSAGGQGSY[+80]VPLLR	Q86X29	LSR	pY372	-0.144206	2.22629	0.0334767	-0.863745	-0.478694		-0.323116	-0.247421	0.58046	-0.137312	-0.615344	-0.29918	0.57182	-0.335422	0.0406529	-0.481854	-1.24833	0.150856	-0.781493	-0.884551	1.10458	0.00139981	-0.927933	-0.670591	-0.227128	2.55436	-0.751888	-0.679157	-0.937397	1.50651	2.26437
Peptide340	YYGY[+80]TGAFR	P02788	LTF	pY547	-0.938905	-0.505605	-0.529251	-0.383	-0.360307	0.507336	-0.207051	-0.673453	-0.595702	-0.232981	-0.283129	1.0135	-0.0962253	-0.541869	-0.711337	-0.262083	-0.627395	-0.186022	-0.31548	1.09951	-0.373086	-0.439116	-0.635873	-0.429423	3.56568	-0.744898	0.953113	0.0177526	-0.690652	0.982981	2.62298
Peptide54	EEPIY[+80]IITEYMAK	P07948	LYN	pY316				0.871689	2.68741	-0.31368	-0.00121362	-0.31948		-0.43682	-0.434027	-0.408659	-0.451119	-0.399628			-0.544464		-0.481374	-0.403835	-0.258373	-0.411628	-0.17837		-0.357458		-0.358314	-0.246787	-0.401867	3.21491	-0.366916
Peptide163	LY[+80]AVVTR	P07948	LYN	pY306	0.110081	-0.581567	3.55109	-0.641228	2.36383	-0.146644	0.438988	0.622747	1.93852	-1.00423	-0.836623	-0.481592	-0.852357	-0.595379	0.264145	-0.201929	-1.22526	-0.400163	-0.354804	-0.43481	0.212562	-0.494722	-0.132897	0.193253	0.414171	-0.19808	-0.478873	-0.700879	-0.481327	0.233618	-0.0996313
Peptide225	SLDNGGYY[+80]ISPR	P07948	LYN	pY194	0.0264479	-1.09036	1.47854	-0.689549	3.0108	-0.475172	0.169559	-0.555262	2.63934	-1.40949	-0.616096	-0.60364	-0.416722	-0.188348	0.929079	0.0922002	0.191259	-0.246108	0.59355	-0.0613741	0.315383	-0.423005	-0.394635	-0.256214	0.750526	-0.666728	-0.945776	-1.028	-0.552581	1.05881	-0.636436
Peptide277	VENC[+57]PDELY[+80]DIMK	P07948	LYN	pY473	-0.705518	-0.733122	1.53523	-0.583729	3.6329	1.39087	-0.0734725	-0.322671	0.885617	-1.11298	-0.761064	-0.241266	0.0990806	-0.271283	0.627326	-0.652779	0.730589	-0.685655	0.393567	1.40507	-0.443869	0.226807	-0.194735	-0.715132	-0.0822422	-1.05596	-1.04986	-1.04477	-0.143834	0.2842	-0.33731
Peptide283	VIEDNEY[+80]TAR	P07948	LYN	pY397	-0.581268	-0.848464	1.22343	-0.370729	-0.102045	0.192174	-0.637077	-0.753599	2.72878	-0.890193	-0.617078	0.553307	0.82784	-0.503011	-0.302374	-0.390966	3.55337	-0.213607	0.529248	0.431925	-0.443824	-0.238158	0.265154	-0.290364	-0.268484	-0.82556	-0.772436	-0.637975	-0.767934	0.444683	-0.294759
Peptide270	VADPDHDHTGFLTEY[+80]VATR	P28482	MAPK1	pY187	2.22903	1.05175	-0.76111	-0.523093	-0.705692	-0.899153	0.155158	-0.594768	0.0741445	-1.10031	-0.841214	-0.271677	-0.960061	-1.02546	0.461499	-1.05728			2.34401	1.14765	0.868174	-0.161697			-0.133304				0.012753	0.690667
Peptide269	VADPDHDHTGFLT[+80]EY[+80]VATR	P28482	MAPK1	pT185;pY187	-0.0997046	-0.293899	0.979146	-0.231447	-0.488082	-0.461755	-0.19092	1.48621	0.726393	-0.554819	-0.331573	-0.472083	-0.554982	-0.547666	0.57753	-0.475658	-0.550837	-0.451822	-0.480675	0.399149	0.146684	-4.9e-05	4.65241	0.139776	-0.393916	-0.446006	-0.567305	-0.427433	-0.253801	-0.367086	-0.465782
Peptide250	TAGTSFMMTPY[+80]VVTR	P53779	MAPK10	pY223	1.31094	-0.433114	0.546368	0.000391871	2.98841	-0.597817	0.917376	-0.224065	0.58038	-1.09168	-1.14978	-0.760581		-1.2445	0.784453	-0.92715		-0.147363	-0.451342	-0.904714	0.564718	0.1375	-0.0177944	0.616081	-0.511181	-0.223288	-0.679542	-0.848732	-0.410887		2.17691
Peptide249	TAGTSFMMT[+80]PY[+80]VVTR	P53779	MAPK10	pT221;pY223	-0.519637	-0.47966		-0.479376	-0.46048		-0.13164	-0.606007	-0.224312	-0.248371	0.362375		-0.73242						2.20087			-0.0757124			2.84469			-0.732018	-0.28966	0.132319	-0.560957
Peptide190	QADEEMTGY[+80]VATR	Q15759	MAPK11	pY182	-0.459809	-0.496174	-0.590047	-0.266638	0.128563	-0.606417	-0.402799	3.1805	0.100365	-1.13715	-0.618334	-0.977228	-0.608849	-0.365067	-0.221496	1.00876	-0.751426	-0.227662	0.653631	2.62981	0.450203	1.21501	0.828336	0.618406	-0.601952	-0.541819	-0.683649	-0.638665	0.908272	-0.660219	-0.866456
Peptide191	QADSEMTGY[+80]VVTR	P53778	MAPK12	pY185	-0.402254	-0.394352	0.404996	-0.641733	0.195242	-0.61941	0.160178	-0.751694	1.0213	-1.09077	-0.573591	-0.657202	-0.697681	-0.77418	0.703225	2.58674	-1.13826	-0.63444	0.362769	1.42432	0.863036	-0.285948	1.58436	2.19218	-0.703501	-0.773062	-0.81539	-0.615307	1.3623	-0.618795	-0.673093
Peptide115	HADAEMTGY[+80]VVTR	O15264	MAPK13	pY182	1.05501	0.302031	-0.488017	-0.845991	1.10891	-0.721597	1.53886	0.735036	-0.0864599	-0.928868	-0.87579	1.3131	-0.77648	3.75193	-0.119332	0.14372	-0.909878	-0.729715	0.168842	-0.336044	0.0928679	-0.456003	-0.21095	-0.86732	0.708398	-0.0774533	-0.456666	-0.883664	0.246829	-0.524291	-0.871016
Peptide114	HADAEMT[+80]GY[+80]VVTR	O15264	MAPK13	pT180;pY182	-0.311835	-0.452339	-0.0923721	-0.68707	0.334638	-0.589864	1.2615	0.381603	-0.284164	-0.688046	-0.670117	1.56571	-0.614902	4.23476	1.21333	-0.108893	-0.600161	-0.150881	-0.586448	-0.648782	0.281888	-0.356997	0.723084	-0.602604	0.21671	-0.435026	-0.254622	-0.60132	-0.186872	-0.629381	-0.660528
Peptide123	HTDDEMTGY[+80]VATR	Q16539	MAPK14	pY182	-1.02504	-0.427603		-0.603743	-0.448143	-0.620573	0.30448	-0.422054	-0.882741	-0.973986	-0.62974	2.69499	-0.527046	0.128272	-0.276272	-0.972266	-0.403259	-0.742883	2.8014	0.525913	-0.37043	0.641943	0.850345	1.6736	0.344119	0.432727	-0.693268	-0.312205	1.07488	-0.224946	-0.916466
Peptide122	HTDDEMT[+80]GY[+80]VATR	Q16539	MAPK14	pT180;pY182	0.662322	-0.757657	0.822355	-0.641652	-0.662364	-0.550014	1.07524	0.401953	1.36174	-1.24262	-1.00624	0.535129	-1.20429	0.388702	0.882441	-0.572097	-1.09268	-0.166687	-1.08937	-0.745593	0.984904	1.95259	2.45276	1.57949	-0.514402	-0.602887	-0.491647	-0.862212	0.136566	-0.440948	-0.592838
Peptide126	IADPEHDHTGFLTEY[+80]VATR	P27361	MAPK3	pY204	4.71358	0.438684	-0.329447	-0.512303	-0.203345	-0.627476	0.246364	-0.347768	0.543068	-0.761675	-0.442219	0.573144	-0.609777	-0.70734	0.334114	-0.732435	-0.757577	-0.210939	0.985679	0.209169	0.365709	-0.453615	-0.0605813	0.193709	0.12477	-0.125972	-0.69797	-0.770237	-0.447486	0.455564	-0.385395
Peptide125	IADPEHDHTGFLT[+80]EY[+80]VATR	P27361	MAPK3	pT202;pY204	1.20741	-0.28939	3.44599	-0.118024	-0.459096	-0.600718	1.02574	-0.277534	1.05636	-0.870292	-0.671154		-0.873501	-0.830034	0.402825	-0.851633	-0.836367	-0.13063	-0.789696	-0.482101	0.0890735	0.895231	1.56593	1.62377	-0.469855	-0.286388	-0.797424	-0.672889	-0.309512	-0.296381	-0.399702
Peptide94	GLC[+57]TSPAEHQYFMTEY[+80]VATR	Q13164	MAPK7	pY221						-0.69947	-0.0898315	1.26758	0.697048	-0.759577	-1.00588	-0.635744	-0.683593	-0.751988		-0.412573	-1.05163		1.47374	-0.192312	-0.444845	0.898648	2.58371		0.219269				-0.412549
Peptide248	TAC[+57]TNFMMTPY[+80]VVTR	P45984	MAPK9	pY185	1.5187	-0.1438	-0.134696	-0.463591	0.451037		0.0444141	-0.391153	-0.339177	-0.766149	-0.694926	-0.516827		-0.579486	3.64613			0.112997			-0.499257	-0.462379	0.138004	1.17084	-0.655871	-0.585068			-0.425837		-0.423911
Peptide187	NQGAHDPDY[+80]ENITLAFK	Q8IX19	MCEMP1	pY38					2.09042	-0.332246	-0.166232		-0.328705	-0.479243	-0.209475	-0.12571	-0.882874	-0.582298		1.77297	-0.825628		-0.704209	-0.534338	-0.427632	-0.564155			-0.86909			1.80067			1.36778
Peptide65	EQY[+80]DVPQEWR	Q9UKN1	MUC12	pY5413	-0.424941	0.103505	0.346746	-0.923761	-0.788959	-0.127262	-0.517525	-0.471088	1.27168	-0.860255	-0.879932	-0.549246	-0.872978	3.17278	-0.594995	0.674654	-0.570022	-0.161615	-0.871849	-0.919016	0.00644163	0.0360253	2.77855	0.0793529	0.726217	0.832192	-0.151142	0.959028	-0.619544	-0.635145	-0.0478972
Peptide36	DSQMQNPY[+80]SR	Q9H3R2	MUC13	pY501	-0.245485	-0.202469	4.48878	-0.278004	-0.373216	-0.414838		-0.403374		-0.345283	-0.376947	-0.26081	-0.41486	0.0358649	-0.412693	-0.287381	-0.428138	-0.18116	-0.366637	1.79774	0.459258	-0.149314	-0.422388	-0.423251	-0.351131	-0.165639			-0.33835	0.0646679	-0.00494241
Peptide310	Y[+80]IDLDK	Q9BRK3	MXRA8	pY429		-0.59269		-0.514664				-0.868704	-0.401192	-0.196184	-0.235355	2.42819					-0.0315905			0.851698		-0.000387218	0.684913	1.71738	-0.941988	-1.14425	-0.917125	0.881755	-0.719805
Peptide9	ALELDPNLY[+80]R	P35580	MYH10	pY761	-0.463174	0.141077	-0.120285	-0.517183	-0.577004	-0.550459	-0.268678	-0.605017	0.0547464	-0.54629	-0.201855	-0.497097	-0.543184	-0.391617	-0.268759	3.99664	-0.166812	0.289461	-0.362583	-0.157427	1.07804	0.128191	-0.373703	-0.058543	2.93998	-0.600745	-0.366782	-0.136809	0.18365	-0.459699	-0.578081
Peptide58	EIENLTQQY[+80]EEK	P35749	MYH11	pY1408	-0.290717	-0.303365	-0.187618	-0.260035	-0.302496	-0.302074	-0.288388	-0.303332	-0.232047	-0.303001	-0.149308	-0.288879	-0.282543	-0.194332	-0.277796	5.12838	0.116237	0.0510919	-0.217893	-0.293504	1.36087	0.0403339	-0.289106	-0.270089	-0.297882	-0.304304	-0.271291	-0.117756	-0.0632718	-0.300831	-0.305054
Peptide82	FQKEIENLTQQY[+80]EEK	P35749	MYH11	pY1408	0.897417	-0.575209	-0.470791	-0.602405	1.39718	-0.649212	-0.509158	0.409452	0.349935	0.41815	-0.66126	-0.988157	0.23095	-0.954024	-0.132541	3.35265	-0.603024	0.0457751	-0.353388	-0.286145	0.804657	-1.08412	0.31627	-0.408901	-0.366554	-0.920006	-0.324133	-0.823686	2.41289	-0.765847	0.843243
Peptide10	ALELDSNLY[+80]R	P35579	MYH9	pY754	-1.24094	-0.721246	-0.550833	-0.401384	-1.0293	-0.790434	-0.455747	-1.28932	1.11768	-0.495026	0.519744	0.815976	-0.462097	-0.0744884	0.490907	-0.181092	1.42087	-0.0641285	1.37513	2.7602	-0.7521	1.0986	0.271363	1.56594	-0.471765	-1.02111	-0.424812	-1.45711	-0.316021	1.15827	-0.395717
Peptide178	NKDQGTYEDY[+80]VEGLR	P60660	MYL6	pY89	1.12872	-0.747949			-1.28242	0.224839		-0.73596	-0.846502	-0.0415229	-0.397787			-0.968683	1.01275		-0.113558					-0.740492	-0.0878378	3.14056	0.011652	-0.523389			0.243107	0.537757	0.186716
Peptide98	GNFNY[+80]VEFTR	P24844	MYL9	pY156	-0.200755		-0.25969	-0.798402			-1.12814	-0.859542	-0.657348		-0.290685				-0.345897	1.9827		0.0584577	-0.79926		0.653788	0.554725	-0.586991	2.54398			-1.16981	0.305175	1.36095	-0.407977	0.0447339
Peptide3	AEFAEY[+80]ASVDR	Q9NWQ8	PAG1	pY227	-0.25892	-0.727956	0.372488	-0.524731	-0.0452018	1.00994	-0.182602	-0.611815	3.01318	-1.17986	-0.689897	0.326927	0.451534	-0.953878	0.52603	-1.1423	0.920871	-0.467298	0.43764	-0.639288	-0.592818	-0.128142	0.403306	-0.319966	1.13477	-0.692944	-0.846788	-1.18678	-0.661531	2.59714	0.658895
Peptide64	ENDY[+80]ESISDLQQGR	Q9NWQ8	PAG1	pY417	-0.824037	-0.56907	0.859753	-0.36858	-0.834893	0.157509	-0.780658	0.0818677	-0.681008	-1.00997	2.5096	1.43523	-0.151908	-0.911343	0.29364	0.329325	-0.956931	0.0781685	3.29106	-0.647644	-0.19539	-0.938311	0.0428467	0.408266	0.322256	0.458678	-0.963134	-1.07944	0.333294	-0.0291493	0.339979
Peptide223	SGQSLTVPESTY[+80]TSIQGDPQR	Q9NWQ8	PAG1	pY341	-0.701069	-0.864519	0.981787	-0.791437	-0.30529	0.0417458	-0.618088	-0.803915	3.31881	-1.01544	-0.839822	0.890476	0.673388	-0.668689	0.0839271	-0.598719	2.13518	0.10343	0.232533	-0.56826	-0.45514	-0.182319	0.597655	0.204786	-0.17208	-0.884264	-0.736364	-0.657016	-0.560057	1.86108	0.297683
Peptide305	Y[+80]AALSDQGLDIK	Q8WX93	PALLD	pY1348	-0.333931	-0.304225	-0.382788	-0.427387		-0.521782	-0.378984	-0.455831	-0.379343			-0.435801	-0.281433		-0.0505206	-0.0863799	1.12472	4.70553	-0.359828	-0.410623	-0.388188	-0.166225	-0.187215	0.100494	-0.288233	0.0181087	-0.319748	-0.221353	-0.0831501	0.0144211	0.499695
Peptide41	DVTIGGSAPIY[+80]VK	Q8TEW0	PARD3	pY489	0.121085	-0.171108	0.128553		-0.530409	-0.829771	-0.210641	-0.164864	-0.478446		-0.914351	-0.233944	-1.05102			0.403459	0.191036		-1.15195	0.942733	3.23098		-1.19089		-0.487317	0.435226	0.822001				1.13964
Peptide66	ERDY[+80]AEIQDFHR	Q8TEW0	PARD3	pY1080	3.53973	1.72194	-0.515834	0.207599	-0.577772	-0.499778	1.85048	0.826638	1.80794	-0.750732	-0.605971	-0.556764	-0.547847	-0.645269	-0.0621038	-0.635479	-0.773148	-0.630144	-0.441202	-0.576833	-0.404668	-0.397828	-0.242831	-0.367616	0.636548	0.556018	-0.450886	-0.735012	-0.436407	0.119778	-0.412542
Peptide25	DGHPLSPERDHLEGLY[+80]AK	Q8TEW8	PARD3B	pY1000	3.79675	-0.0291564	0.238931	-0.32205	-0.404464	-0.41842	-0.238683	-0.165264	3.55306	-0.521526	-0.497249	-0.0290407	-0.471572	-0.368189	-0.27609	-0.246423	-0.403198	-0.465417	-0.198261	-0.432932	-0.296664	-0.179666	-0.319741	0.0468555	0.0652181	-0.294246	-0.265373	-0.463764	-0.265834	0.129959	-0.257552
Peptide28	DHLEGLY[+80]AK	Q8TEW8	PARD3B	pY1000	1.04151	-0.114368	-0.216275	0.221229	-0.510373	-0.61752	0.148002	0.0366497	5.00076	-0.695078	-0.553227	0.214769	-0.191827	-0.117123	-0.222015	-0.236895	-0.418046	-0.651276	0.441833	-0.377671	0.0474778	-0.266246	-0.470947	0.273161	0.0383494	-0.363663	-0.311994	-0.602493	-0.372421	0.136787	-0.291074
Peptide327	YADIESSNY[+80]MAPYDNYVPSAPER	P09619	PDGFRB	pY771		-0.333464				-0.378551	-0.251587	0.0561199	-0.298222	-0.321534	-0.189952	-0.230931	-0.352638	4.29482					-0.0721987	-0.439019	-0.393201	0.0340733	0.0634892		-0.342232	-0.246667	-0.428134		-0.276229	0.168239	-0.0621811
Peptide331	YHGHSMSDPGVSY[+80]R	P08559	PDHA1	pY301	-0.637935	-0.645721	-0.645236	-0.958134	-0.0603736	0.0574456	0.237844	-0.127585	0.149608	-0.851548	-0.809526	-0.281338	-0.0924176	-0.0716434	-0.169877	0.14871	0.0873002	0.441278	-0.00971285	0.641356	0.631948	1.46929	0.503137	0.014685	-0.679797	-0.761914	-0.864473	-0.341194	4.51999	-0.2835	-0.610667
Peptide290	VTPPEGY[+80]EVVTVFPK	O00151	PDLIM1	pY321	2.48363	0.313318	0.61705	-0.740635	-0.19374		1.44055	-0.270409	0.890494		-1.35381	-1.07278		-0.94543	0.104828	-1.08437	0.800068				0.532278	-0.942056	0.197762	2.30293	-0.586659	-0.330645	-0.732059	-0.162207	-0.241908	-0.570871	-0.455328
Peptide112	GY[+80]FFLDER	P50479	PDLIM4	pY293	0.3112	2.4137	0.992507	1.5656	0.0274446	-0.45886	0.431316	2.02205	0.510243	-1.08835	0.0782427	-0.701384	1.46072	-1.19543	-0.771355	1.29213	-1.08941	-0.782577	0.494576	0.112375	0.428055	-0.977097	-0.677178	-0.751255	0.35288	-0.663458	-0.545853	-1.59487	-0.678636	0.03006	-0.547389
Peptide273	VDLGSEVY[+80]R	P50479	PDLIM4	pY191	-0.0170479	-0.679182	0.348303	0.227947	-0.838944	-1.07707	-0.32277	-0.401545	3.85247	-0.627945	-0.198732	0.352082	-0.467996	-0.538317	0.223204	1.16818	-0.467625	-0.38609	-0.154673	-0.0837384	-0.516831	0.551263	0.611921	2.45396	-0.134255	-0.883756	-0.718498	0.00937577	0.236807	-0.859636	-0.660865
Peptide336	YTEFY[+80]HVPTHSDASK	Q96HC4	PDLIM5	pY251	0.195918	-0.517956	-0.512792	0.0399744	-0.712178	-1.09506	0.178841	-0.298996	0.913196	-1.10868	-0.485504	-0.515381	-0.90563	-0.626345	0.499825	-0.916572	-0.497416	-0.372354	-0.213202	-0.16575	-0.158273	0.399561	3.20081	3.2277	0.736018	-0.30458	-0.276103	-0.586393	0.109468	0.565421	0.202429
Peptide323	Y[+80]SSMAASFR	Q13113	PDZK1IP1	pY83	-0.219719	-0.153675	4.96177	-0.302848	-0.268815		-0.277756	-0.311698	0.0271	-0.308548	-0.196949	-0.292719		-0.166316	-0.244012	-0.144684		-0.138732	-0.161622		0.171111	-0.299025	-0.329984	-0.255728	-0.257252	-0.0449679	-0.252925	-0.248949	-0.295163	0.11204	-0.0999325
Peptide151	LGLDY[+80]EER	Q99623	PHB2	pY128	0.11966	1.16947	-0.138569	-0.95605	1.92319	0.357331	2.28753	1.89397	-0.675429	-1.07615	-1.19556	0.255358	-0.671395	-0.736791	-1.01504	0.628694	0.0560379	-1.03437	0.666753	-0.244963	1.00648	-1.10123	0.0630761	-1.26211	1.11553	0.698397	-0.809032	-0.863866	-0.930306	0.206284	0.263088
Peptide328	YAGEVY[+80]GMIR	P42356	PI4KA	pY1154	0.815054	-0.864028	-0.806184	-1.04053	-0.479496	-0.388055	-0.642861	-0.570038	0.0584757		-0.44629				1.4848	-0.603652	-1.20157		-0.933996	0.0977199	1.70357	1.12259	0.556068	2.62446	0.830025	0.225499	-1.11662	-0.823668	-0.318604	0.717325
Peptide276	VEFGVY[+80]ESGPR	Q6ZUJ8	PIK3AP1	pY694	-0.922256	-0.849602	-0.0325514	-0.774077	-0.461094	-0.0459174	-0.622879	-0.722731	-0.206429	-0.885816	-0.425962	3.49038	1.55085	-0.270332	-0.744284	-0.572341	1.77837	0.0136631	0.555891	1.66929	0.120639	-0.451613	0.282994	-0.0395031	-0.317667	-0.042138	-0.895942	-0.244344	-0.870261	-0.378464	1.31412
Peptide35	DQY[+80]LMWLTQK	P27986	PIK3R1	pY580	0.432079	0.783897	0.193547	-1.93602	-0.200187	-1.25421	0.309972	-0.173384	0.798328	-1.52628	-1.18081	0.732788	0.523814	-0.722452	0.517024	0.414586	-1.76099	-0.084898	-1.45057	-0.0665516	0.861637	0.00356905	2.20301	0.828244	-0.515332	-0.387913	0.100099	-0.463048	1.32168	-0.202496	1.90087
Peptide71	EYDRLY[+80]EEYTR	P27986	PIK3R1	pY467	0.0592099	-0.0249704	-0.467729	-1.11809	-0.865629	-0.637265	-0.842212	1.54544	0.19231	-0.579223	-0.00936938	-0.264805	-0.87866	-1.03126	0.252095	-0.891377	-2.23211	-0.014171	1.66267	1.23856	-0.336416	0.442048	1.84292	0.0121378	0.813568	-0.561526	0.151275	-1.33754	0.843405	1.37667	1.66004
Peptide152	LHEY[+80]NTQFQEK	P27986	PIK3R1	pY452	-0.772396	0.179735	-0.527806	-1.02622	-0.927364	-0.181047	-0.217914	-0.159782	1.15174	-0.940211	-0.666486	0.0710228	3.59997	0.171848	0.109796	-0.3871	0.0493427	-1.24796	1.33907	1.39334	0.482716	0.0652533	1.46505	0.0497321	-0.559119	-1.0622	-0.0558419	-1.37456	0.0467523	0.314732	-0.384101
Peptide167	LYEEY[+80]TR	P27986	PIK3R1	pY470	-0.650704	-0.25932	-0.4179	-0.355375	-0.792362	-0.637278	-0.45163	-0.0535901	0.47253	-0.721279	-0.545731	-0.39876	4.55275	-0.211883	0.440454	0.48108	-0.491956	-0.886037	0.819931	1.18925	0.278843	0.0635086	1.02795	0.208841	-0.320184	-0.613954	-0.214891	-0.619836	-0.391048	-0.0443765	-0.457042
Peptide165	LY[+80]EEYTR	P27986	PIK3R1	pY467	-0.275168	0.0706648	-0.319218	-0.215138	-0.531711	-0.319854	-0.771101	0.267605	0.297799	-0.850352	0.178467	-0.964806	-0.652047	-0.494497	-0.640377	0.390671	-1.94397	-0.595273	2.75182	3.09782	1.52918	0.0698121	0.985896	-0.00305204	-0.0156292	-0.813159	0.0226813	-0.572477	0.047796	0.3176	-0.0499856
Peptide260	TRDQY[+80]LMWLTQK	P27986	PIK3R1	pY580	0.783381	-0.220647	-0.500001	4.93504	0.0919103	-0.415502	-0.417293	-0.291725	0.0566139	-0.55919	-0.54016	-0.348582	0.170959	-0.451535	0.954997	-0.102851	-0.737324	0.129569	-0.535283	-0.28405	-0.233433	-0.274164	0.559063	0.13185	-0.424994	-0.325315	-0.443891	-0.587455	0.0462099	-0.379729	0.213527
Peptide70	EYDQLY[+80]EEYTR	O00459	PIK3R2	pY464	0.681903	0.808398	-0.766823	-1.10564	0.822941	0.144403	1.44596	1.06133	-0.162044	-0.871253	-0.504076	2.72342	-1.03567	-0.797792	-0.292589	-0.352106	-1.34815	-0.794384	0.0035448	-0.471569	0.419097	-0.708843	0.00517043	-0.459752	2.16349	1.18524	-0.562324	-0.948026	-0.732279	1.02514	-0.576711
Peptide238	SREYDQLY[+80]EEYTR	O00459	PIK3R2	pY464	0.174631	1.70898	-0.609999	-0.707253	1.18974	-0.0655052	1.48979	2.37141	1.2888	-0.870138	-0.989674	2.0346	-0.931178	-0.735875	-0.580376	-0.397563	-1.24721	-0.526385	-0.200903	-0.742763	0.707254	-0.54845	-0.285564	-0.370498	1.40614	0.244096	-0.628501	-1.06647	-0.220395	-0.529305	-0.361427
Peptide85	GDY[+80]PLEAVR	P14618	PKM	pY370	2.07751	-0.465501	-0.590839	-0.237699	-0.513371	0.51911	-0.189805	-0.620156	-0.616328	-0.738736	-1.03252		3.1849	2.23058	-0.551462	0.850184	0.579871	-0.33685	-0.258367		-0.161476	-0.148877	-0.229619		-0.626865	-0.600795	-0.324521	-0.497298	-0.368669		-0.332396
Peptide252	TATESFASDPILY[+80]RPVAVALDTK	P14618	PKM	pY105					3.58557	-0.561864	0.255671	0.208871	-0.341295	-0.294827	-0.397563	-0.382649		-0.530969			-0.53603		-0.568885		-0.333276	-0.524911	0.0840182		-0.458876		-0.348721		-0.111255		1.25699
Peptide7	AHY[+80]THSDYQYSQR	Q99959	PKP2	pY161	1.6788	0.865642	0.0285372	1.03035	-0.0990185	-0.20384	4.11361	0.107816	0.485962		-0.648355	-0.0549284	-0.432556	-0.655815	0.419022	-0.725751		-0.691319	0.156379	-0.69627	0.415048	-0.728688	-0.647012	-0.635018	-0.670932	-0.155954	-0.349476	-0.75888	-0.512577	0.0411654	-0.675934
Peptide118	HFDTY[+80]HR	Q99959	PKP2	pY217	0.355485	-0.0663583	-0.159065	1.59325	-0.264492	-0.11526	4.53339	0.540567	0.592016	-0.838124	-0.577335	-0.135709	-0.220135	-0.691982	0.953082	-0.520374	-0.544776	-0.49375	0.157099	-0.559691	-0.386984	-0.374267	-0.53676	-0.521159	-0.487822	0.0805258	-0.342204	-0.720235	-0.229272	0.540692	-0.560357
Peptide265	TY[+80]DMLK	Q99959	PKP2	pY108	-0.067321	-0.282321	-0.311844	0.571131	-0.137266	-0.188127	3.25644	0.210274	0.964746	-0.83839	-0.748659	-0.283786	0.413092	-0.371156	3.45542	-0.629647	-0.462789	-0.626619	0.275631	-0.594308	-0.00429104	-0.496826	0.064457	-0.706371	-0.360951	-0.187112	-0.693696	-0.806979	-0.370973	0.548258	-0.590019
Peptide334	YSQNIY[+80]IQNR	Q99959	PKP2	pY631	0.423008	-0.33085	4.2272	-0.405144	-0.524074	-0.369376	-0.194697	-0.358624	0.221226	-0.785769	-0.496849	-0.479933	-0.636488	-0.0155727	1.38927	-0.810321		1.29539	-0.501165	-0.789074	0.778558	-0.685496	-0.14282	0.494115	-0.711028	-0.352348	-0.613226	0.455844	-0.426577	-0.38329	0.728114
Peptide1	ADY[+80]DTLSLR	Q9Y446	PKP3	pY176	0.69723	1.8562	-0.484475	-0.704647	-0.475315	-0.603501	1.13287	-0.171831	2.66638	-0.848476	-0.777829	-0.162177	-0.51519	-0.791372	-0.0826806	-0.716223	-0.926031	-0.576565	0.254447	-0.804691	-0.105659	-0.423069	0.165321	-0.670874	1.94215	1.17059	-0.502612	-0.803283	-0.719089	2.10236	-0.121961
Peptide104	GQY[+80]HTLQAGFSSR	Q9Y446	PKP3	pY84	1.36809	2.07985		-0.0707094	0.0379144	-0.640569	2.32859	0.558339	0.780222	-0.870246	-0.843601	-0.600578	-0.716309	-1.10631	-0.614312			-0.663054	-0.267949		-0.610703	-0.978676	-0.855012		1.07235	0.776166	-0.59954		-0.932682	1.23537	0.133358
Peptide181	NLIY[+80]DNADNK	Q9Y446	PKP3	pY390	-0.484809	3.31699	-0.826912	-0.970503	-0.789728	-0.907744	-0.375407	0.747243	0.0376477	-0.462441	-0.680575	-0.538731	-0.154282	1.023	-0.712518	0.748175	0.278204	-0.755756	1.79063	-0.623131	0.317234	-0.453594	-0.598546	-1.00303	1.28099	1.05154	-0.154574	-0.778996	-1.0449	0.943849	0.780669
Peptide243	STTNY[+80]VDFYSTK	Q99569	PKP4	pY1168	4.4177	0.542587	-0.672747	-0.23535	-0.462017	-0.529754	1.02128	0.512959	0.901495	-0.618911	-0.37268	-0.175842	-0.32129	-0.402318	0.347917	-0.70568	-0.749868	-0.269242	-0.494227		-0.332186	-0.626919	-0.0587798	-0.684102	0.79422	0.364371	-0.645293	-0.753946	-0.498071	0.868881	-0.162192
Peptide139	IY[+80]EPLDVK	P47712	PLA2G4A	pY535	-0.859743	-0.777046	-0.515932	-0.617763	0.517934	-1.0507	-0.812182	-0.695256	-1.07357		-0.798281	0.303145	0.634304		2.08715	-0.291604	0.532144		-0.821598		0.737092		-0.254214		-0.107937			2.70186	0.25282		0.909379
Peptide134	IGTAEPDY[+80]GALYEGR	P19174	PLCG1	pY771	0.847075	0.189891	1.43976	0.133944	-0.151096	-0.804761	0.299793	0.025365	3.76524	-1.26538	-0.408795	0.00530555	-0.205676	-0.875874	-0.105307	-1.12892	-1.02386	-0.714843	-0.712775	-0.451892	0.0572866	-0.814128	1.15191	0.725981	0.315194	-0.223249	-0.580067	-1.19869	0.512358	1.1735	0.0227241
Peptide182	NPGFY[+80]VEANPMPTFK	P19174	PLCG1	pY783		0.0989075	4.31056		-0.221541	-0.48586	-0.265446	-0.257494	1.29987	-0.679012	-0.669064	-0.49148	0.259636	-0.193105		0.00274711	1.171		-0.443928	-0.116605	0.0270227	-0.320164	-0.220787		-0.204781	-0.165451	-0.47591	-0.645541	-0.497273	-0.318896	-0.497399
Peptide317	Y[+80]QQPFEDFR	P19174	PLCG1	pY1253	1.79878	2.03671	0.355987	-0.434018	0.523409	-1.63469	0.644385	0.123333	-0.224252	-0.695172	-0.770133	-0.746643	0.65073	-1.10237	-0.520058	-0.00877392	-0.673288	1.07116	0.0877278	-0.108085	1.21025	-0.963888	-1.71463	-0.674588	1.34376	0.537328	-0.515474	-0.412227	-1.5141	1.60484	0.723993
Peptide219	SEDIY[+80]ADPAAYVMR	Q9Y2H5	PLEKHA6	pY492	3.49721	0.730249	-0.227747	-0.639119	1.69437	-0.829066	0.867077	0.448965	1.59965	-0.905436	-0.77023	0.379842	-0.772998	-0.717962	-0.150304	-0.801288	-0.885994	-0.682367	-0.620229	-0.869498	0.422535	-0.72768	-0.0458402	-0.172937	0.745568	0.132353	-0.506783	-0.827223	-0.745701	1.01846	0.362114
Peptide31	DLEY[+80]LDLK	Q6IQ23	PLEKHA7	pY665	2.22648	0.311066	-0.0887374	-0.554982	0.38309	-0.354257	1.26215	1.09884	1.47225	-0.913951	-0.843573	-0.435104	0.242563	-0.293416	3.28757	-0.597216	0.462075	-1.24001	-0.408891	-1.06543	-0.325882	-0.672589	-0.495226	-0.667187	-0.593761	0.253561	-0.534707	-0.659477	-0.241293	0.643225	-0.65719
Peptide318	Y[+80]QTLPGR	Q6IQ23	PLEKHA7	pY1011	1.64913	-0.443302		0.278302	-0.675387		2.79532	0.0859894	1.074			-0.692915	-0.691166		0.901328				-0.287291		-0.216543	-0.885029	-0.85715		-0.467396	-0.403594			-0.804421	-0.359869
Peptide149	LEPQIASASEY[+80]AHR	O60664	PLIN3	pY95	-0.120281	0.100587	1.2782	-1.07553	-0.294992	1.47013	-0.104435	-1.17915	3.0969	-0.826979	-0.533574	1.71962	-0.618407		-0.516244	-0.244161	-0.302238	-0.194443	0.559278	-0.388043	-0.708607	-0.365306	-0.593401	-0.0717587	-0.51414	0.3744	-1.47147	-1.21707	0.586719	1.14386	1.01054
Peptide50	EATQPEPIY[+80]AESTK	Q86YV5	PRAG1	pY413	0.861257	-0.32661	2.63688	0.0193124	-0.790543	-0.834198	1.89174	-0.170683	0.43685	-0.925693	-0.509356	1.23808	-0.0777992	-0.911624	0.237286	-1.03332	-1.00482	-0.805279	0.0937061	-0.527317	0.0791275	-1.02999	1.27417	1.6032	1.75791	-0.605502	-0.470187	-0.536915	-0.05001	-1.02334	-0.49634
Peptide213	RSDSASSEPVGIY[+80]QGFEK	Q05655	PRKCD	pY313	3.66599	0.637837	-0.246344	-0.842062	1.08221	-0.959222	0.332397	0.524721	1.49231	-0.970148	-0.936469	0.641363	-0.884985	-0.829976	0.71076	-0.424726	-0.776307	-0.343176	-0.466132	-0.981259	0.447575	-0.137814	-0.386207	-0.118969	0.511795	0.470612	-0.486089	-0.896586	-0.537712	1.33999	-0.633389
Peptide217	SDSASSEPVGIY[+80]QGFEK	Q05655	PRKCD	pY313	3.88301	0.49909	-0.0327994	-0.636056	1.14525	-0.832373	0.388149	0.325287	2.08937	-0.906359	-0.849092	0.427959	-0.618479	-0.716398	0.320336	0.125216	-0.723384	-0.604769	-0.0563739	-0.692912	0.670321	-0.446213	-0.582333	-0.288202	0.0748211	0.059617	-0.650222	-0.809987	-0.637414	0.730791	-0.655855
Peptide254	TGVAGEDMQDNSGTY[+80]GK	Q05655	PRKCD	pY334	3.47562	-0.114897	0.145725	-0.147765	0.756642	-0.465909	0.344887	0.244734	3.21903	-0.766257	-0.648994	0.415464	-0.0359775	-0.657943	-0.296691	-0.321142	-0.776548	-0.605947	0.892469	-0.389142	-0.180231	-0.433912	-0.45774	-0.478598	-0.167929	-0.559032	-0.593549	-0.731133	-0.65885	0.49068	-0.497059
Peptide146	LC[+57]DFGSASHVADNDITPY[+80]LVSR	Q13523	PRPF4B	pY849	1.13987	3.61109	-0.680349	-1.26751	0.286629	-0.833569	0.97314	0.145532	0.628199	-0.609154	-0.588026	-0.0398532	-1.08057	-0.413759	0.248855	0.409768	-1.31825	-0.825648	-1.05045	-0.560194	1.56208	-0.577798	-0.124645	1.07918	-0.410409	0.777828	0.237932	-0.545474	0.181021	-0.451567	0.0960942
Peptide332	YIEDEDYY[+80]KASVTR	Q14289	PTK2B	pY580	3.20578	-0.336648	0.756874	-0.853091	1.80708	0.475484	0.389991	1.02095	0.11692	-1.25831	-0.695478	-0.318768	-0.54014	-0.208029	0.392942	-0.543566	-1.4429	-0.476733	0.757903	0.409529	-0.159658	-0.920535	1.62051	0.514042	-0.317346	-1.1915	-0.487331	-1.00212	0.535184	-0.554172	-0.696854
Peptide288	VSEKPSADY[+80]VLSVR	Q13882	PTK6	pY114	0.614575	0.618984	-0.0232261	-1.30213	0.790516	-1.23348	1.73728	-0.489316	0.023957	-1.06529	-1.06708	-0.0816077	-0.999385	0.644953	1.25472	-0.570369	-0.550206	0.0315929	-0.989501	-1.33377	0.0915082	-0.341505	-0.936333	0.304282	-0.262993	1.51272	0.440654	0.325593	-0.608694	3.02824	0.435315
Peptide90	GHEY[+80]TNIK	Q06124	PTPN11	pY546	-0.617537	-0.10223	2.08628	1.20763	0.204862	0.369323	0.302907	-1.10638	2.65832	-1.22936	-0.571411	-0.60368	-0.697763	-0.799057	0.180623	0.668172	-1.1675	-0.89112	-0.206302	1.51113	1.23959	1.21081	-0.0412352	0.299199	-0.729247	-0.514279	-1.10544	-1.09273	-0.689373	0.377015	-0.151211
Peptide137	IQNTGDY[+80]YDLYGGEK	Q06124	PTPN11	pY62	-0.00803225	1.85471	-0.937936	-0.470455	0.0690474	-0.687543	0.261183	1.33721	1.546	-0.215152	0.314726	0.574579	-0.500864	-0.156713	-0.661153	-1.15821	-1.25076	-0.561034	0.218182	-1.07927	0.0549919	-0.884705	-0.349312	-0.813059	3.09761	1.4744	-0.0838765	-1.27956	0.210102	-0.162513	0.24742
Peptide295	VY[+80]ENVGLMQQQK	Q06124	PTPN11	pY584	-0.436638	-0.136996	-0.121483	-0.5374	-0.346984	-0.674052	0.294076	-0.592491	3.23926		3.73065	0.202062	-0.236002	-0.280937	-0.343479	-0.449388	-0.366476	-0.133934	0.224309	-0.489136	0.13506	0.249827	0.0750954	0.0874492	-0.132477	-0.78207	-0.883077	-0.473372	0.0383757	-0.309694	-0.550079
Peptide215	SAEEAPLY[+80]SK	Q99952	PTPN18	pY389	-0.8888	-1.04895	0.138799	0.231744	-1.01356	1.14432	0.559136	-0.88525	0.856745	-1.45958	-0.0553518	0.671181	0.652841	-0.930731	-0.461032	-0.606158	2.27956	-0.853232	1.33454	2.46528	-0.334204	1.2614	0.314864	0.368536	-0.635741	-1.3538	-1.07491	-0.437917	-0.119205	0.148277	-0.268806
Peptide220	SEQENPLFPIY[+80]ENVNPEYHR	P23467	PTPRB	pY1981	1.12861	-0.334185	4.23017	-0.444104	-0.492641	-0.599119	-0.0878065	-0.615531	0.627064	-0.794115	-0.570921	0.23785	-0.546174	-0.373541	1.08342	0.410537	-0.925334		-0.504636	-0.0157411	0.997825	-0.219134	-0.543326	0.114793	-0.543322	-0.410381	-0.770387	-0.259932	-0.663769	1.12353	-0.239697
Peptide307	Y[+80]ANVIAYDHSR	P10586	PTPRF	pY1381		0.449767		-0.917829	2.01085	-0.0586261	-0.631326	-0.964613	-0.563185	-0.586834	0.0802777	-0.350714	-1.09168			-0.0300847	0.820624	1.5915				-0.455751	-0.872609	-0.434145	-0.101409	-0.324671	-0.156526	0.215748	-0.579824	2.95106
Peptide80	FIHQQPQSSSPVY[+80]GSSAK	P49023	PXN	pY88	0.495418	-0.579317	-0.26135	1.34112	-0.43163	0.293437	-0.151333	-0.00502483	3.90587	-0.889669	-0.559832	-0.48243	-0.56088	-0.457133	-0.176218	-0.450164	-0.11499	-0.236043	-0.490224	-0.248851	-0.368783	-0.30418	0.027546	0.665711	-0.366455	-0.617232	-0.327214	-0.479775	-0.221193	2.73684	-0.68602
Peptide278	VGEEEHVY[+80]SFPNK	P49023	PXN	pY118	0.400634	-0.235494	0.139909	0.26662	-0.409324	-0.422427	0.206877	-0.309377	4.81697	-1.05938	-0.500352	-0.576416	-0.657266	-0.340512	0.425592	-0.514884	-0.131536	-0.58485	-0.360447	-0.220438	-0.191328	-0.0558734	-0.265655	0.810947	-0.144223	-0.491288	-0.269042	-0.163749	0.36129	1.073	-0.597973
Peptide60	EKPAQDPLY[+80]DVPNASGGQAGGPQRPGR	Q13671	RIN1	pY36	0.843307	0.00152376	-0.0887099	-0.306825	2.0989	-0.596364	1.30308	-0.063541	2.29929	-1.08058	-0.831697	-0.443815	-0.376705	-0.953832	-0.201766	-0.649222	-0.901419	-0.774356	1.82933	-0.332383	0.216661	0.241806	-0.629336	-0.169739	0.334376	-0.46429	-0.768688	-0.964992	-0.228941	2.44027	-0.781358
Peptide111	GY[+80]AYVEFENPDEAEK	Q15287	RNPS1	pY205	0.504812	-0.18933	-0.312562	-0.313885	-0.209818	-0.282648	-0.267012	-0.273123	-0.252086	-0.282303	-0.209753	-0.201662	-0.176168	-0.309		-0.274665	5.21392	-0.0263024	-0.225008	-0.211881	-0.235732	-0.238897	-0.15371	-0.141315	-0.20448	-0.193607	-0.113379	-0.209982	-0.319359	0.311225	-0.20229
Peptide129	IEGVY[+80]AR	P18077	RPL35A	pY34	-0.329641	1.21725	-0.209971	-1.03198	1.1632	-0.0458869	2.69045	0.212691	-0.327657	-0.630584	-0.912638	-0.718885	-0.737225	-0.974363	-0.56279	0.328501	-0.619295	-0.956435	-0.222413	0.647028	2.56591	-0.923765	-0.518471	-0.698765	0.794887	0.663922	-0.28323	-0.0311711	-0.744619	1.71718	-0.521248
Peptide135	IIQLLDDY[+80]PK	P05388	RPLP0	pY24	0.448274	1.63545	-0.854979	-0.51466	3.06251	-0.143088	2.65343	-0.425949	-0.493848	0.986648	-0.0547333	-0.272593	-0.620607	-0.88867	-0.28229	-0.808554	-0.926416	-0.563487	-0.722908	-0.833109	0.0817139	-0.774403	0.000925947	-0.698358	0.929208	0.542608	0.74492	-0.923375	-0.439492	-0.074922	0.230746
Peptide127	IAIY[+80]ELLFK	P46783	RPS10	pY12					1.34912	-0.613689	1.20466	0.0831987		-0.24491	-0.678686	1.93055	-0.971982	-0.857444		1.27493	-0.951573	2.51995	-0.900431	-0.633976	-0.150641	-0.787346	-0.445273		-0.28743	0.356718	-0.568147	-0.527873	-0.886771	0.929949	-0.1429
Peptide14	APTNEFY[+80]A	P31431	SDC4	pY197	0.0603539	1.4527	1.46824	0.619247	0.385344	-0.684842	0.00750083	0.177769	1.71563	0.440314	-0.310138	0.770228	0.0142078	-0.677269	-0.942677	0.718104	-0.96145	-3.1525	-0.297043	0.161342	0.303888	-0.797196	-0.562094	-0.808441	-0.285655	1.27316	0.1637	-0.564406	-0.736313	1.78785	-0.739567
Peptide306	Y[+80]AAPELEIAR	Q86VE9	SERINC5	pY345	-0.332376	3.10217	0.215853	-0.376415	0.0791088	-0.132512	-0.637956	-0.543832	1.23829	-0.652639	-0.662902	-0.798901	0.727316	-0.0784379	-0.626544	-0.797465		-0.597102		-0.827645	-0.0181674	-0.292845	-0.398264	-0.703993	-0.436227	1.70787	-0.74148	-0.508303	-0.567101	1.70328	1.95722
Peptide157	LPQDDDRPADEY[+80]DQPWEWNR	Q15464	SHB	pY336		0.996791		0.176611	2.34291	-0.512375	3.01783	0.0671948		-0.95152	-0.887199	-0.525798	-0.443445	-0.751129	-0.230447	-0.609566		1.63253	-0.511237	-0.292242	0.77211	-0.357584	-0.638722	-0.288125	0.190102	0.61895	-0.892623	-0.86157	-0.708388	0.145778	-0.498839
Peptide289	VTIADDY[+80]SDPFDAK	Q15464	SHB	pY246	2.53977	0.152252	-0.461763	-0.459806	0.136599	-0.604804	1.86863	-0.200425	3.47186	-0.676445	-0.617215	-0.0163112	0.242541	-0.568139	0.0211669	-0.784249	-0.524868	-0.273611	-0.665465	-0.262775	1.31941	-0.0807027	-0.601416	-0.546652	-0.340849	0.0882326	-0.752526	-0.706429	-0.666616	0.427671	-0.457068
Peptide34	DQEAPSTTEY[+80]SEIK	O15389	SIGLEC5	pY544	-0.845481	-0.731663	-0.754733	-0.224768	-0.404122	2.06086	-0.261218	-0.638102	-0.241212	-0.432829	0.0695317	0.885517	0.703979	-0.809719	-0.56297	-0.75967	2.94569	-0.650437	1.4221	0.594929	-0.753939	0.0790776	-0.790573	-0.508046	1.30908	-0.732249	-0.84355	-0.537118	-0.801476	1.77309	0.440014
Peptide102	GQEATDTEY[+80]SEIK	Q9Y336	SIGLEC9	pY456	-0.850399	-0.928502	-0.0954845	1.73032	-0.683027	0.972721	-0.305958	-1.51029	0.589362	-1.25909	0.576751	0.998454	0.741244	-0.939812	-0.691961	-1.135	1.55618	0.263073	-0.242499	1.91052	-0.490359	0.591618	-0.530337	-0.747642	1.33559	-0.869708	-1.09174	-0.233732	-0.700287	1.78615	0.253834
Peptide185	NQALNTDNY[+80]GHDLASVQALQR	Q13813	SPTAN1	pY1261	0.824388	0.0583548	-0.63662		-0.318815	-0.73191	-0.068022	-1.00204	0.00564149		-0.698188	-0.553049				-0.0744829	0.146208			-0.345721	-0.234532	-0.563823	-0.220706	2.51147	-0.380978	3.21549	-0.367343		-0.691492	0.558621	-0.43246
Peptide201	QNLLSQSHAY[+80]QQFLR	Q01082	SPTBN1	pY1171							-0.260347	1.72249	0.297511	-0.684939	-0.547324	-0.656794	0.316946	-0.581012			-0.160244		-0.527447	-0.763152	-0.212397	0.335175	-0.335608		0.250684		-0.514029		-0.847597		3.16809
Peptide161	LVNEAPVYSVY[+80]SK	O75886	STAM2	pY374	-0.209038	-0.14546	-0.165053	-0.261059	5.37076	-0.215399	-0.186005	-0.133379	0.12243	-0.253008	-0.243238	-0.141492	-0.150345	-0.202643	-0.196267	-0.235719	-0.207981	-0.208502	-0.0824481	-0.194088	-0.195639	-0.200091	-0.0414756	-0.0472178	-0.292102	-0.19637	-0.254253	-0.234007	-0.177658	-0.179089	-0.244161
Peptide329	YC[+57]RPESQEHPEADPGSAAPY[+80]LK	P40763	STAT3	pY705	-0.349835	-0.947915	-0.48948	-0.57419	1.47485	-0.691104	0.819064	2.12101	2.07782	-0.849738	-1.16488	-0.502603	-0.691606	1.26626	1.30114	-0.396209	0.915381	-0.225978	0.911939	0.953322	-0.172982	0.697731	-0.222519	0.453029	-0.991133	-1.30132	-0.692279	-1.39368	-0.306253	0.151848	-1.17969
Peptide196	QESTVSFNPY[+80]EPELAPWAADKGPQR	P43405	SYK	pY323	1.53817	-0.625665	0.923761		2.84051	-0.918825	1.02174	0.481351	0.611398	-0.948481	-0.912263	0.701096		-0.979742		-0.685518	-1.01075		-0.901584	-0.955819	-0.528341	-0.251459	1.05161		-0.433263	0.876449	-0.826238	-0.41587	0.403582		-0.0558509
Peptide326	Y[+80]VLDDQY[+80]TSSSGAK	P42680	TEC	pY513;pY519								-0.455118		3.34653	-0.359726		-0.503227		-0.452989	1.34772	-0.37225	-0.251488	-0.100895			-0.371214		-0.516131		-0.500784	-0.101484	0.0739514	-0.401155		-0.381746
Peptide77	FEEPAPLSY[+80]DSRPR	Q07157	TJP1	pY1140	2.95974	0.347938	-0.203231	-0.497325	-0.0555299	-1.39624	-0.443278	-0.909547	1.60251	-0.587126	0.58972	-0.125265	-1.3004	0.155418	0.324848	-0.793483	-0.0240879	-1.18304	0.698252	-1.33876	1.14243	0.946298	-0.256541	-0.0283852	0.884151	-0.235846	0.0730945	-1.18864	1.07742	1.05209	-1.28718
Peptide207	QYFEQY[+80]SR	Q07157	TJP1	pY1195	0.453888	0.621291					-0.194602	-0.535595	3.43153		-1.05665				0.287745		-0.884707	-0.619037				-0.545058	-0.145121	-0.228288	0.801771	0.318088	-0.535577	-0.318989	-0.622737	-0.227944
Peptide232	SNHY[+80]DPEEDEEYYR	Q07157	TJP1	pY1346	-0.717636	0.85437	2.5981	-0.681431	-0.409613	-0.734631	-0.602689	1.40902	-0.710429	-0.426687	-0.719964	-0.737522	-0.714068	-0.630613	-0.119704	-0.603317	-0.697612	0.308951	-0.709406	-0.701386	-0.0322647	-0.541392	-0.720473	1.87284	0.294548	-0.579946	1.42472	-0.204592	1.72409	-0.459327	1.96806
Peptide233	SNHY[+80]DPEEDEEYYRK	Q07157	TJP1	pY1346	1.04921	1.19674	0.0355067	-0.671178	-0.0666718	-0.472119	0.492536	-0.637598	4.58052	-0.358681	-0.550623	-0.402224	-0.446103	-0.433338	-0.274515	-0.414878	-0.115493	-0.610198	-0.521654	-0.608182	0.386135	-0.293062	-0.182411	-0.630334	0.957925	0.752523	-0.207277	-0.618495	-0.3055	-0.183202	-0.44736
Peptide121	HPDIY[+80]AVPIK	Q9UDY2	TJP2	pY1118	1.41232	0.248947	-0.37467	-0.680568	0.0888288	-1.01992	0.405218	0.355413	0.966445	-1.15456	-0.832224	3.49535	0.0781681	-0.472375	-0.471027	-0.571936	-0.93817	-0.191739	0.951182	-0.484304	2.44612	-0.766421	-0.133198	-0.264503	-0.465292	-0.372498	-0.065737	-0.78438	-0.487053	-0.199103	0.28169
Peptide8	ALDY[+80]YMLR	Q9Y490	TLN1	pY70	-0.851499	1.61277	-0.71596	-0.45461	-0.78038	-1.01983	1.78563	-0.85625	0.542743	-1.19953	-0.616688	0.371651	-0.873872	-1.51886	0.325	-0.102192	-0.810857	-0.354005	0.190699	1.44073	1.63119	0.3731	1.71087	0.799264	0.611669	0.191521	-0.824868	-1.48265	-0.122882	1.46911	-0.470991
Peptide49	EAAY[+80]HPEVAPDVR	Q9Y490	TLN1	pY2224	-0.581329	0.423852	-0.621119	-0.545351	-0.452347	-1.60714	0.697978	-0.927143	1.26786	-1.34891	1.04959	-0.0882379	-1.62964	-0.950392	-0.266198	0.670125	2.61379	-0.5265	-0.437727	0.134039	0.135534	0.520115	1.5434	1.92257	-0.536604	-0.732754	0.304438	-0.517491	-0.20367	1.01519	-0.325926
Peptide234	SNTSPEELGPLANQLTSDY[+80]GR	Q9Y490	TLN1	pY1893	-0.88264	-0.450388	-0.181652	-0.531263		0.66143	-0.208759	0.042653	1.76453	-1.92153	-0.525673	0.0681781	0.465839			-0.114684	-1.48256	1.65187	-0.127727	1.17301	1.46819	0.923732	0.769802		-1.5753			-0.576825	-0.410237
Peptide257	TMQFEPSTMVY[+80]DAC[+57]R	Q9Y490	TLN1	pY26	-0.0958324	-0.446494	0.507365	0.0348702	0.815095	-1.37498	1.18485	-0.476677	0.325249	-1.06092	-0.945703	0.219287	-0.983102	0.213879	0.0823357	0.7986	-1.68427	3.27033	-1.29861	-0.799332	1.86047	0.297255	0.467439	0.540036	-0.559463	-0.355088	-0.55439	-0.455038	0.539119	0.386876	-0.453151
Peptide51	EC[+57]DY[+80]SIDGINR	Q9Y4G6	TLN2	pY1665	0.718951	0.141694	-0.0302751	-0.724448	0.0256173	-1.77077	1.8072	-0.956635	2.12759	-2.66403	-0.482033	-0.992732	-0.0933656	0.115437	1.76005	-0.0119994	-0.472794	0.111888	0.566224	0.616719	0.937981	-0.0260954	-0.137781	1.42522	-0.668141	-0.990719	0.189132	-0.319909	-0.143889	0.288888	-0.346978
Peptide12	ALPQNDDHY[+80]VMQEHR	Q07912	TNK2	pY284	2.10324	0.0711372	-0.0382142	-0.739015	-1.1062	-0.887525	0.19849	-0.314673	1.27791	-1.70908	-0.261094	-0.720311	-0.895123	0.353947	-0.698364	0.659086	0.107983	-0.627352	0.564588	0.944215	0.743997	0.0918587	0.0868671	0.20896	0.0824314	-0.645737	-0.697466	-1.16109	0.349795	3.29633	-0.639593
Peptide145	KPTY[+80]DPVSEDQDPLSSDFKR	Q07912	TNK2	pY518	1.71112	0.0217154	1.62517	-0.761576	-0.727021	-1.04437	0.324972	-0.11645	2.99476	-1.26623	-0.78841	-0.684605	-1.07883	-0.730997	-0.426338	0.593502	-1.33416	-0.166305	-0.61414	-0.511419	0.981341	0.158733	0.554548	0.990781	0.415529	-0.382276	-0.290773	-0.791932	0.0437455	1.54897	-0.249059
Peptide308	Y[+80]ATPQVIQAPGPR	Q07912	TNK2	pY827	1.4207	-0.215335	-0.19425	-0.64925	-0.852721		-0.130691	-0.423751	0.352073		-0.707375			4.1576	-0.0114904	0.0200596		-0.258595			-0.0942725	-0.489198	-0.0851106	-0.369243	-0.686886	-0.545145	-0.442168	-0.274796	0.162074	0.340949	-0.0231738
Peptide6	AGSLPNY[+80]ATINGK	Q9HBL0	TNS1	pY1404	-0.239719	-0.509749	-0.124341	0.915873	-0.725358	-0.718281	-0.236631	-0.783399	3.7762	-0.955579	-0.356662	-0.893961	-0.737044	-0.713486	1.4135	0.183614	-0.674807	-0.018601	-0.625685	-0.167919	0.575433	1.99182	-0.150057	1.00423	-0.523285	-0.670868	-0.569715	0.438624	0.422018	0.195036	-0.521194
Peptide24	DDGMEEVVGHTQGPLDGSLY[+80]AK	Q9HBL0	TNS1	pY366	3.86263	-0.254559	0.200908		-0.602878	-0.756443	-0.181561		-0.594139		-0.600951	-0.394836				-0.0675769			-0.590707	-0.439855	0.826367	0.391589	0.545347		-0.462483		-0.296626	-0.309238	-0.0365851		-0.238401
Peptide120	HPAGVY[+80]QVSGLHNK	Q9HBL0	TNS1	pY1254	0.448017	-0.0713515	-0.100883	0.100822	-0.671237	-1.001	0.281772	-0.687006	1.02978	-0.915084	-0.483412	-0.855092	-0.96153	-0.678465	-0.444677	1.96915	-0.962771	0.415181	-0.927148	-0.912542	1.4418	1.33194	0.488969	1.70536	-0.817586	-0.376145	-0.475191	0.825021	2.65143	-0.670766	-0.677357
Peptide218	SDVY[+80]SDLNTQRPYYK	O43914	TYROBP	pY102	-1.00693	-1.41644	0.369478	-0.360755	-0.740671	0.986086	-0.0467873	-0.924458	1.40739	-0.943716	-0.388426	1.78627	1.15425	-0.933323	0.497743	-0.820193	2.49499	-0.27799	0.605518	0.162413	-1.03917	0.842868	0.622459	-0.283826	-0.393053	-1.09186	-0.993287	-0.802829	-0.616577	1.50782	0.643006
Peptide287	VQIY[+80]HNPTANSFR	P50552	VASP	pY39	1.36088	1.51582	-0.472551	-0.888951	2.44455	-0.548674	1.19641	0.393541	0.89762	-1.38172	0.0337982	-0.329908	-1.28072	-1.43735	-0.819262	1.68897	-1.80551	-0.737369	0.0706221	-0.0622047	0.541855	-0.149839	-0.456047	-0.247206	0.986088	-0.12007	0.158207	-0.650663	-0.500771	0.872484	-0.272042
Peptide44	DY[+80]LIDGSR	P18206	VCL	pY107	-0.371181	-0.32187	-0.255522	-0.238501	-0.523674	-0.56526	-0.377754	-0.686575	-0.127479	-0.690905	-0.141819	-0.34797	-0.32778	-0.230832	-0.223006	4.72312	0.616364	0.185421	-0.0431223	0.122235	1.94691	0.210434	-0.280532	-0.169827	-0.547383	-0.38047	-0.315514	0.0027381	0.103313	-0.183279	-0.560277
Peptide183	NPGNQAAY[+80]EHFETMK	P18206	VCL	pY692	-0.0292424	-0.581111	-0.754225	0.51295	-0.194494	-0.284935	-0.421289	-0.0888604	0.289451	-1.06894	-0.402581	0.32028	0.177107	-0.353099	1.08269	-0.281179	3.52407	-0.540358	1.42088	2.32616	-0.318104	0.824033	-0.341748	0.125975	-0.646978	-1.05983	-1.13628	-0.828397	-0.840252	0.140849	-0.572538
Peptide221	SFLDSGY[+80]R	P18206	VCL	pY822	-0.142955	0.188328	-0.532083	-0.190629	-0.578679	-0.572492	-0.0245917	-0.425627	-0.216425	-0.626376	-0.0634001	-0.330358	-0.594619	-0.0310955	0.14241	-0.0564733	5.1683	-0.346293	-0.3507	0.0713602	-0.295128	-0.141388	0.0621994	0.457573	0.0319838	-0.11339	0.190475	-0.401985	-0.447792	0.352835	-0.182985
Peptide72	FANY[+80]IDK	P08670	VIM	pY117	-1.58847	1.28762	-0.791752	0.330854	-1.11319	-0.51222	0.477039	-1.22918	-0.192336	-0.835635	-0.519748	0.343075	-0.472534	0.573911	1.10211	-1.14006	-0.124517	-1.26635	1.84515	2.77748	-0.0328471	-0.149028	1.6072	0.622199	0.802043	-0.277012	0.141295	-0.849335	-0.653542	0.0164479	-0.178662
Peptide230	SLYASSPGGVY[+80]ATR	P08670	VIM	pY61	-0.587786	-0.712328	0.503423	-0.433571	-0.467639	-0.548822	0.0749326	-0.257402	0.772162	-1.13306	-0.8825	1.6355	-0.402174	-1.04477	1.01402	-0.848562	-1.11932	-0.0697365	1.63475	0.829833	-0.465548	0.213107	2.07383	2.91877	-0.565941	-0.96269	-0.669153	-0.484939	-0.0196567	0.273996	-0.268734
Peptide284	VIY[+80]DFIEK	O00401	WASL	pY256	0.56223	0.029545	0.416405	0.0636221	-0.730238	-1.04555	0.1739	-0.0261869	4.34514	-1.27872	-0.451413	-0.290137	-0.769651	-0.172804	-0.27634	0.569246	-0.496271	-0.488559	-0.172049	0.0661558	0.616179	-0.0443066	0.804846	0.657926	0.914929	-0.808824	-0.937221	-0.583952	0.105911	0.342468	-1.09629
Peptide83	GAY[+80]SLSIR	P07947	YES1	pY194	-0.276796	0.0315455	0.415705	-0.7533	-0.645396	0.105286	0.64675	-0.324168	1.58255	-1.98859	0.0169824	0.190966	0.0188436	-1.12641	0.24528	2.08949	-0.342173	-1.14266	1.4999	2.34409	0.114445	0.976651	-0.657362	0.381716	0.692738	-1.26112	-1.23523	-1.11703	-0.249786	0.327821	-0.560733
Peptide147	LDNGGY[+80]YITTR	P07947	YES1	pY222	0.499635	-0.201012	0.843088	-1.09765	-0.50789	-0.760674	0.28933	0.0466604	2.02753	-1.64677	0.645113	-0.660232	-1.02422	-0.833545	0.744932	2.75296	-1.95571	-0.711215	0.378516	0.595092	0.889295	1.01189	0.3723	0.687603	-0.595372	-0.304359	-0.690053	-0.591873	0.548626	-0.0535027	-0.698498
Peptide303	WTAPEAALY[+80]GR	P07947	YES1	pY446	-0.300782	-0.154593	0.700128	-0.222618	0.00829262	-0.192546	0.207431	0.0735091	1.85063	-0.169318	-0.171374	-0.287844	-0.0137474	0.0165795	4.69678	-0.662948	-0.743938	-0.611146	-0.467977	-0.25636	-0.054919	0.105277	-0.334718	-0.349818	-0.78769	-0.412355	-0.654013	-0.604875	-0.341801	-0.0421464	0.178901
Peptide312	Y[+80]LAEVAAGDDK	P63104	YWHAZ	pY128	-0.174852	-0.442626	-0.555011	-0.302084	-0.422067		-0.118003	-0.96805	-0.198619	-0.303849	-0.293172	-0.615056			-0.595045	3.53732		-0.165196				-0.234022	-0.627207	1.3365	-0.767762	0.819319	-0.420644	-0.623352	0.609296		1.52418
Peptide128	IDTLNSDGY[+80]TPEPAR	P43403	ZAP70	pY292		1.23924	2.12037				-1.04294	0.96442		-1.08065				-1.30244	-0.392891			-0.182798			0.574906		-1.08598	0.111588	-0.641772		0.300098	-0.771075	0.060264		1.12965
